# Supplementary material
Source: PubMed Central journal article supplement (PMC2646372)

## *Supporting Information*

# The Design, Synthesis and Evaluation of Coumarin Ring Derivatives of the Novobiocin Scaffold that Exhibit Anti-proliferative Activity

*Alison C. Donnelly,<sup>1,†</sup> Jared R. Mays,<sup>1,†</sup> Joseph A. Burlison,<sup>†</sup> John T. Nelson,<sup>†</sup> George Vielhauer,<sup>‡</sup> Jeffrey Holzbeierlein,<sup>‡</sup> and Brian S. J. Blagg<sup>\*,†</sup>*

Department of Medicinal Chemistry, 1251 Wescoe Hall Drive, Malott 4070, The University of Kansas, Lawrence, Kansas 66045-7563, and Department of Urology, The University of Kansas Medical Center, 3901 Rainbow Blvd., Mail Stop 3016, Kansas City, Kansas 66160

### Table of Contents

| <u>Description</u>                     | <u>Page</u> |
|----------------------------------------|-------------|
| <sup>1</sup> H NMR of <b>2a</b> .....  | S5          |
| <sup>1</sup> H NMR of <b>3a</b> .....  | S6          |
| <sup>13</sup> C NMR of <b>3a</b> ..... | S7          |
| <sup>1</sup> H NMR of <b>3b</b> .....  | S8          |
| <sup>1</sup> H NMR of <b>4a</b> .....  | S9          |
| <sup>13</sup> C NMR of <b>4a</b> ..... | S10         |
| <sup>1</sup> H NMR of <b>4b</b> .....  | S11         |
| <sup>13</sup> C NMR of <b>4b</b> ..... | S12         |
| <sup>1</sup> H NMR of <b>4c</b> .....  | S13         |
| <sup>13</sup> C NMR of <b>4c</b> ..... | S14         |
| <sup>1</sup> H NMR of <b>5a</b> .....  | S15         |
| <sup>13</sup> C NMR of <b>5a</b> ..... | S16         |
| <sup>1</sup> H NMR of <b>5b</b> .....  | S17         |
| <sup>13</sup> C NMR of <b>5b</b> ..... | S18         |
| <sup>1</sup> H NMR of <b>5c</b> .....  | S19         |
| <sup>13</sup> C NMR of <b>5c</b> ..... | S20         |
| <sup>1</sup> H NMR of <b>6a</b> .....  | S21         |
| <sup>13</sup> C NMR of <b>6a</b> ..... | S22         |
| <sup>1</sup> H NMR of <b>6b</b> .....  | S23         |
| <sup>13</sup> C NMR of <b>6b</b> ..... | S24         |
| <sup>1</sup> H NMR of <b>6c</b> .....  | S25         |
| <sup>13</sup> C NMR of <b>6c</b> ..... | S26         |

|                                         |     |
|-----------------------------------------|-----|
| <sup>1</sup> H NMR of <b>8</b> .....    | S27 |
| <sup>13</sup> C NMR of <b>8</b> .....   | S28 |
| <sup>1</sup> H NMR of <b>9</b> .....    | S29 |
| <sup>13</sup> C NMR of <b>9</b> .....   | S30 |
| <sup>1</sup> H NMR of <b>10</b> .....   | S31 |
| <sup>13</sup> C NMR of <b>10</b> .....  | S32 |
| <sup>1</sup> H NMR of <b>12</b> .....   | S33 |
| <sup>1</sup> H NMR of <b>13</b> .....   | S34 |
| <sup>13</sup> C NMR of <b>13</b> .....  | S35 |
| <sup>1</sup> H NMR of <b>14</b> .....   | S36 |
| <sup>1</sup> H NMR of <b>15</b> .....   | S37 |
| <sup>13</sup> C NMR of <b>15</b> .....  | S38 |
| <sup>1</sup> H NMR of <b>16</b> .....   | S39 |
| <sup>13</sup> C NMR of <b>16</b> .....  | S40 |
| <sup>1</sup> H NMR of <b>17</b> .....   | S41 |
| <sup>1</sup> H NMR of <b>19</b> .....   | S42 |
| <sup>1</sup> H NMR of <b>23a</b> .....  | S43 |
| <sup>13</sup> C NMR of <b>23a</b> ..... | S44 |
| <sup>1</sup> H NMR of <b>23b</b> .....  | S45 |
| <sup>13</sup> C NMR of <b>23b</b> ..... | S46 |
| <sup>1</sup> H NMR of <b>23c</b> .....  | S47 |
| <sup>13</sup> C NMR of <b>23c</b> ..... | S48 |
| <sup>1</sup> H NMR of <b>23d</b> .....  | S49 |
| <sup>13</sup> C NMR of <b>23d</b> ..... | S50 |
| <sup>1</sup> H NMR of <b>23e</b> .....  | S51 |
| <sup>13</sup> C NMR of <b>23e</b> ..... | S52 |
| <sup>1</sup> H NMR of <b>23f</b> .....  | S53 |
| <sup>13</sup> C NMR of <b>23f</b> ..... | S54 |
| <sup>1</sup> H NMR of <b>23g</b> .....  | S55 |
| <sup>13</sup> C NMR of <b>23g</b> ..... | S56 |
| <sup>1</sup> H NMR of <b>23h</b> .....  | S57 |
| <sup>13</sup> C NMR of <b>23h</b> ..... | S58 |
| <sup>1</sup> H NMR of <b>25a</b> .....  | S59 |
| <sup>13</sup> C NMR of <b>25a</b> ..... | S60 |
| <sup>1</sup> H NMR of <b>25b</b> .....  | S61 |
| <sup>13</sup> C NMR of <b>25b</b> ..... | S62 |
| <sup>1</sup> H NMR of <b>25c</b> .....  | S63 |
| <sup>13</sup> C NMR of <b>25c</b> ..... | S64 |
| <sup>1</sup> H NMR of <b>25d</b> .....  | S65 |
| <sup>13</sup> C NMR of <b>25d</b> ..... | S66 |
| <sup>1</sup> H NMR of <b>25e</b> .....  | S67 |
| <sup>13</sup> C NMR of <b>25e</b> ..... | S68 |
| <sup>1</sup> H NMR of <b>25f</b> .....  | S69 |
| <sup>13</sup> C NMR of <b>25f</b> ..... | S70 |
| <sup>1</sup> H NMR of <b>25g</b> .....  | S71 |
| <sup>13</sup> C NMR of <b>25g</b> ..... | S72 |

|                                         |      |
|-----------------------------------------|------|
| <sup>1</sup> H NMR of <b>25h</b> .....  | S73  |
| <sup>13</sup> C NMR of <b>25h</b> ..... | S74  |
| <sup>1</sup> H NMR of <b>26a</b> .....  | S75  |
| <sup>13</sup> C NMR of <b>26a</b> ..... | S76  |
| <sup>1</sup> H NMR of <b>26b</b> .....  | S77  |
| <sup>13</sup> C NMR of <b>26b</b> ..... | S78  |
| <sup>1</sup> H NMR of <b>26c</b> .....  | S79  |
| <sup>13</sup> C NMR of <b>26c</b> ..... | S80  |
| <sup>1</sup> H NMR of <b>26d</b> .....  | S81  |
| <sup>13</sup> C NMR of <b>26d</b> ..... | S82  |
| <sup>1</sup> H NMR of <b>26e</b> .....  | S83  |
| <sup>13</sup> C NMR of <b>26e</b> ..... | S84  |
| <sup>1</sup> H NMR of <b>26f</b> .....  | S85  |
| <sup>13</sup> C NMR of <b>26f</b> ..... | S86  |
| <sup>1</sup> H NMR of <b>26g</b> .....  | S87  |
| <sup>13</sup> C NMR of <b>26g</b> ..... | S88  |
| <sup>1</sup> H NMR of <b>26h</b> .....  | S89  |
| <sup>13</sup> C NMR of <b>26h</b> ..... | S90  |
| <sup>1</sup> H NMR of <b>26i</b> .....  | S91  |
| <sup>13</sup> C NMR of <b>26i</b> ..... | S92  |
| <sup>1</sup> H NMR of <b>26j</b> .....  | S93  |
| <sup>13</sup> C NMR of <b>26j</b> ..... | S94  |
| <sup>1</sup> H NMR of <b>26k</b> .....  | S95  |
| <sup>13</sup> C NMR of <b>26k</b> ..... | S96  |
| <sup>1</sup> H NMR of <b>26l</b> .....  | S97  |
| <sup>13</sup> C NMR of <b>26l</b> ..... | S98  |
| <sup>1</sup> H NMR of <b>26m</b> .....  | S99  |
| <sup>13</sup> C NMR of <b>26m</b> ..... | S100 |
| <sup>1</sup> H NMR of <b>26n</b> .....  | S101 |
| <sup>1</sup> H NMR of <b>26o</b> .....  | S102 |
| <sup>13</sup> C NMR of <b>26o</b> ..... | S103 |
| <sup>1</sup> H NMR of <b>26p</b> .....  | S104 |
| <sup>13</sup> C NMR of <b>26p</b> ..... | S105 |
| <sup>1</sup> H NMR of <b>28</b> .....   | S106 |
| <sup>13</sup> C NMR of <b>28</b> .....  | S107 |
| <sup>1</sup> H NMR of <b>31</b> .....   | S108 |
| <sup>13</sup> C NMR of <b>31</b> .....  | S109 |
| <sup>1</sup> H NMR of <b>32</b> .....   | S110 |
| <sup>13</sup> C NMR of <b>32</b> .....  | S111 |
| <sup>1</sup> H NMR of <b>33</b> .....   | S112 |
| <sup>13</sup> C NMR of <b>33</b> .....  | S113 |
| <sup>1</sup> H NMR of <b>34</b> .....   | S114 |
| <sup>13</sup> C NMR of <b>34</b> .....  | S115 |
| <sup>1</sup> H NMR of <b>36</b> .....   | S116 |
| <sup>13</sup> C NMR of <b>36</b> .....  | S117 |
| <sup>1</sup> H NMR of <b>37</b> .....   | S118 |

|                                         |      |
|-----------------------------------------|------|
| <sup>13</sup> C NMR of <b>37</b> .....  | S119 |
| <sup>1</sup> H NMR of <b>38</b> .....   | S120 |
| <sup>13</sup> C NMR of <b>38</b> .....  | S121 |
| <sup>1</sup> H NMR of <b>39</b> .....   | S122 |
| <sup>13</sup> C NMR of <b>39</b> .....  | S123 |
| <sup>1</sup> H NMR of <b>42a</b> .....  | S124 |
| <sup>13</sup> C NMR of <b>42a</b> ..... | S125 |
| <sup>1</sup> H NMR of <b>42b</b> .....  | S126 |
| <sup>13</sup> C NMR of <b>42b</b> ..... | S127 |
| <sup>1</sup> H NMR of <b>42c</b> .....  | S128 |
| <sup>13</sup> C NMR of <b>42c</b> ..... | S129 |
| <sup>1</sup> H NMR of <b>42d</b> .....  | S130 |
| <sup>13</sup> C NMR of <b>42d</b> ..... | S131 |

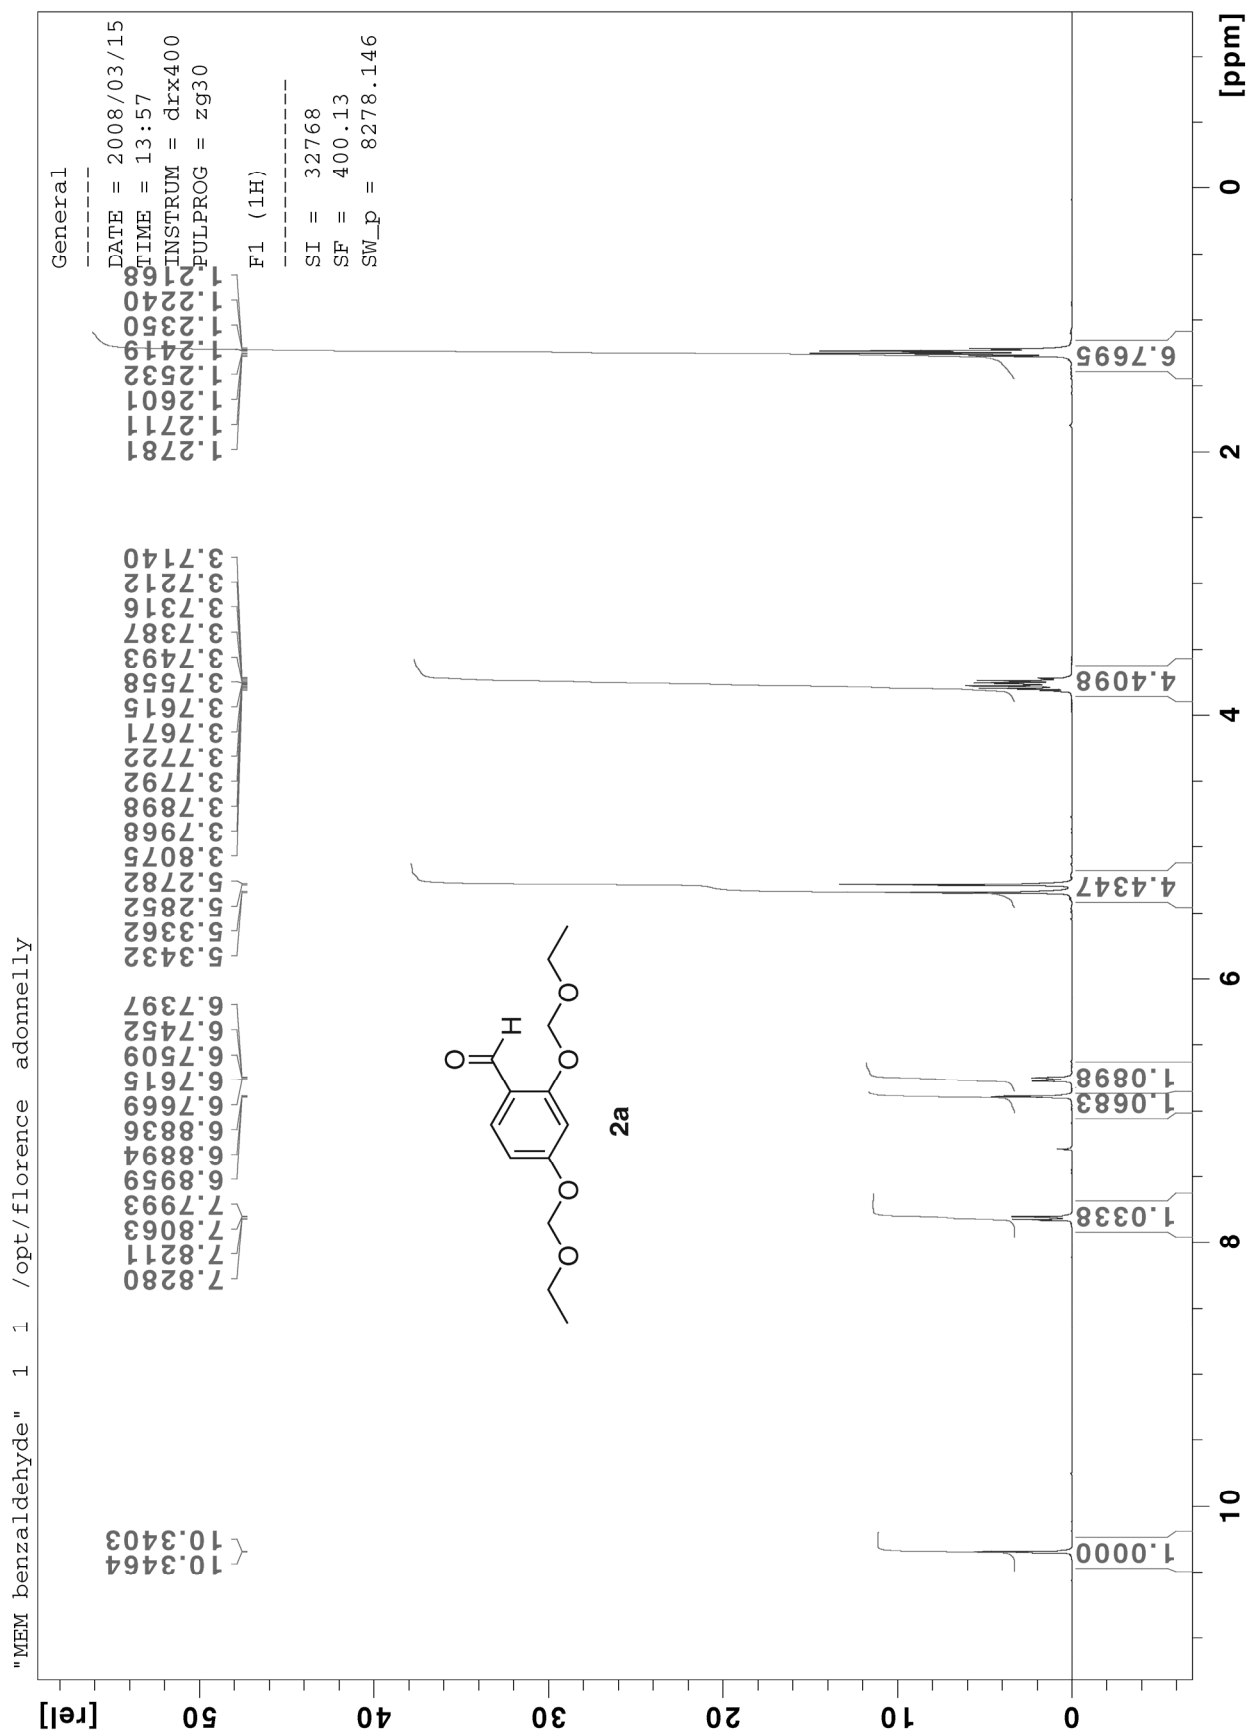

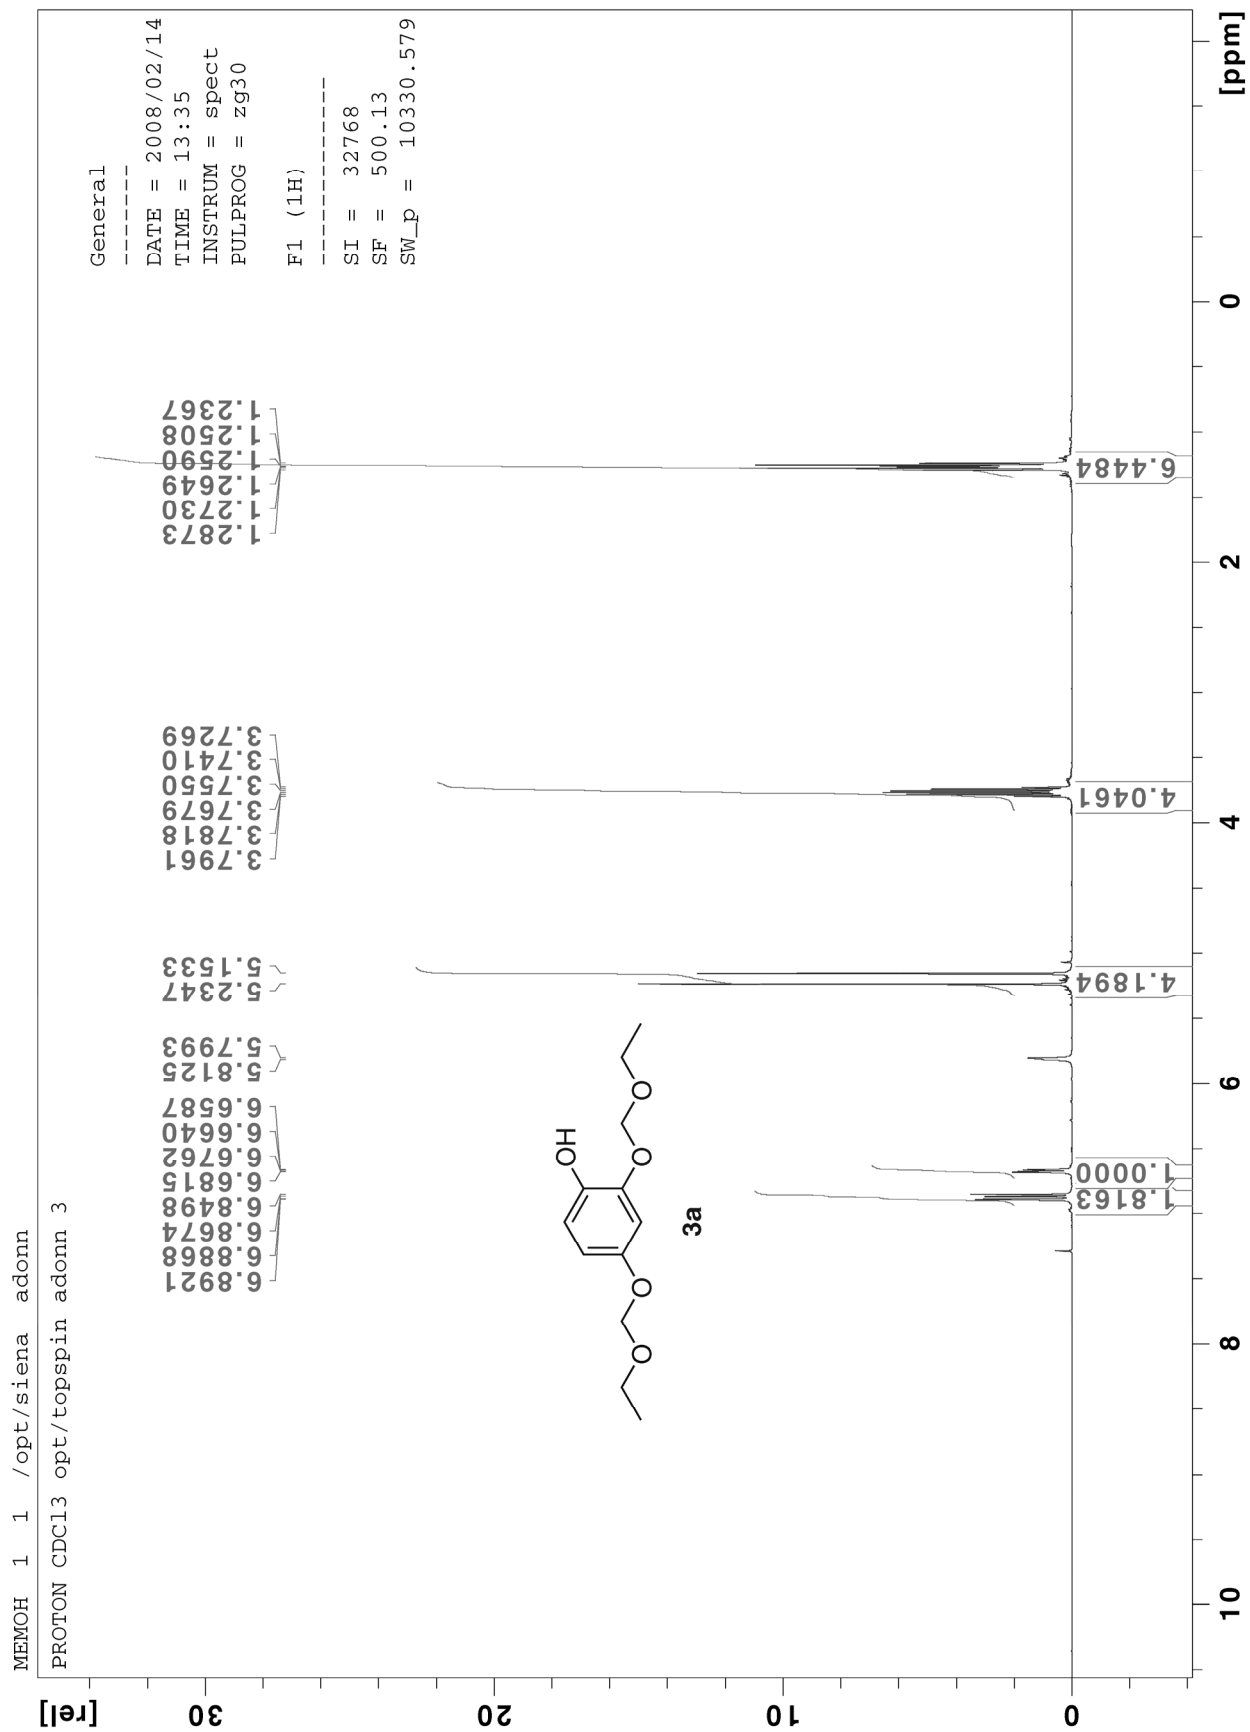

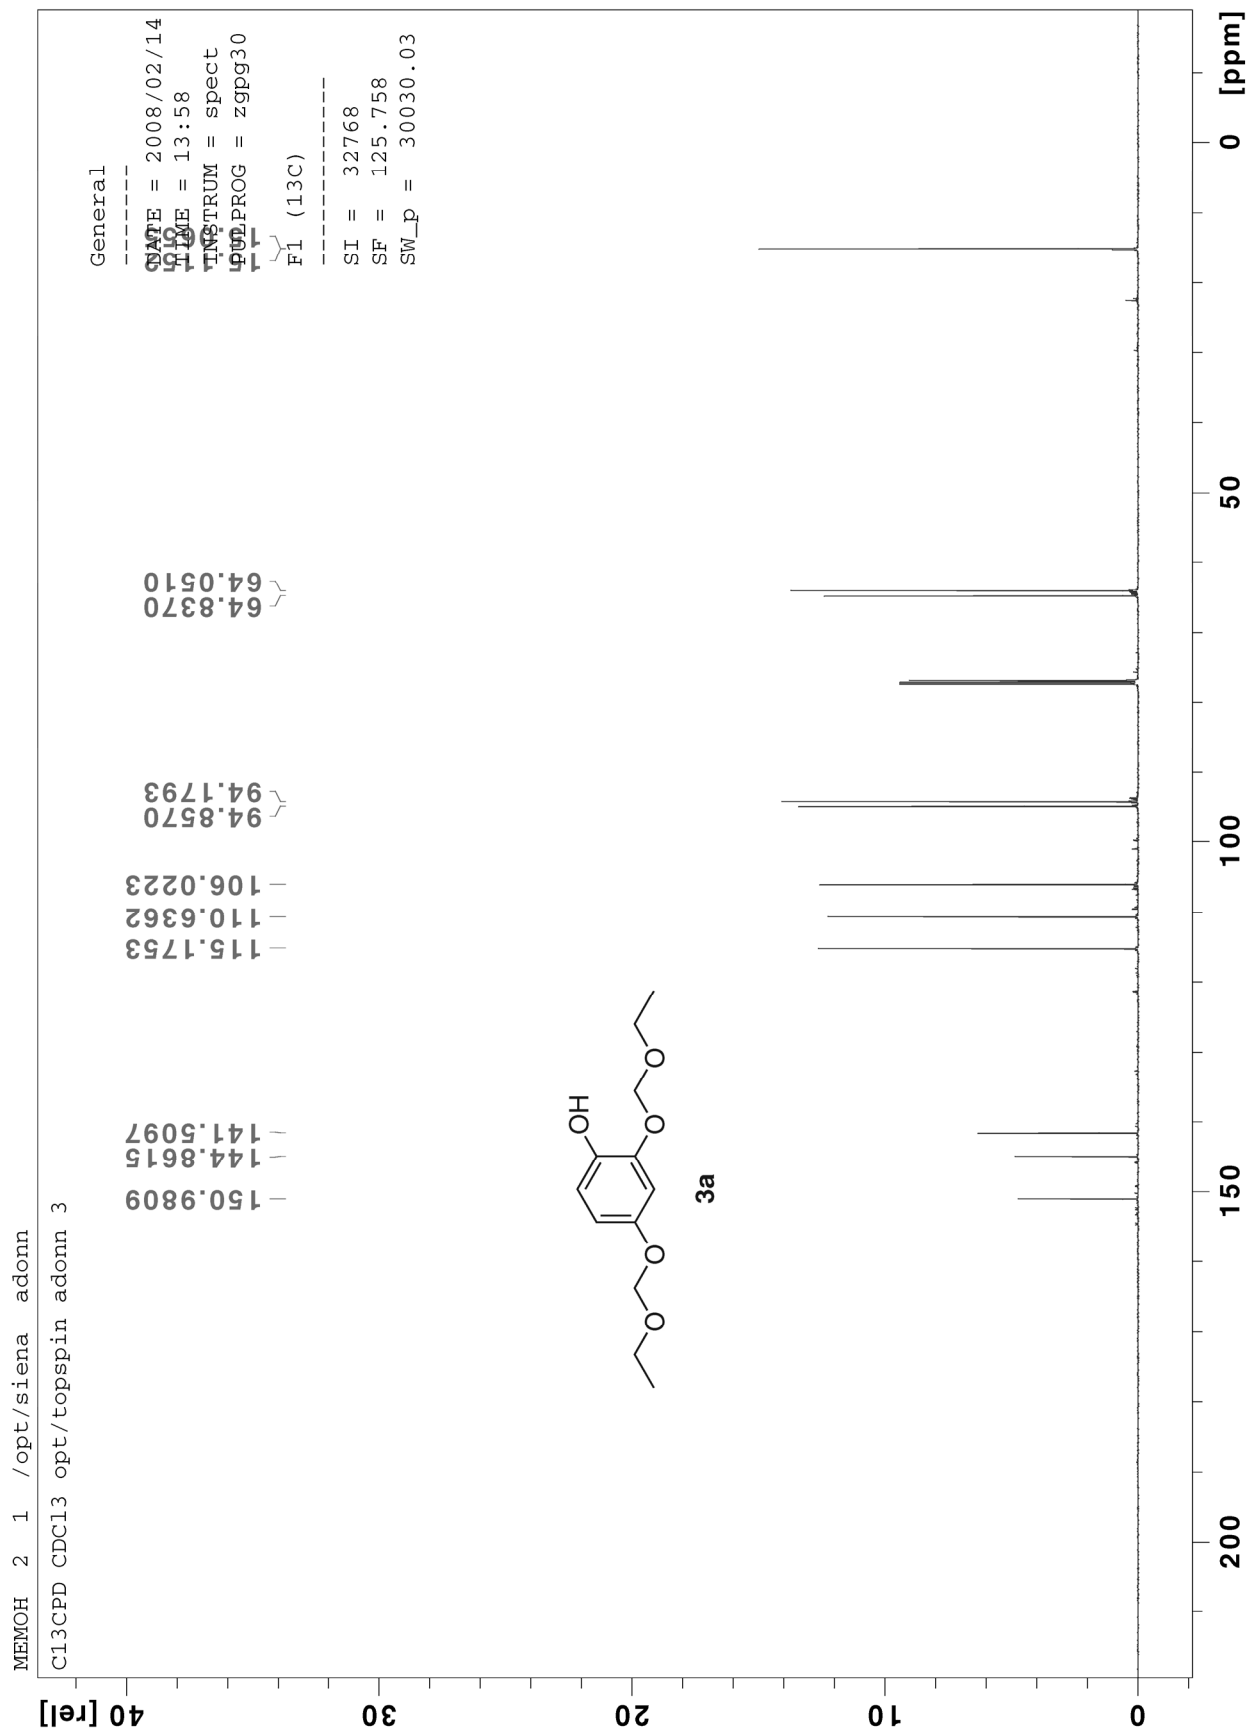

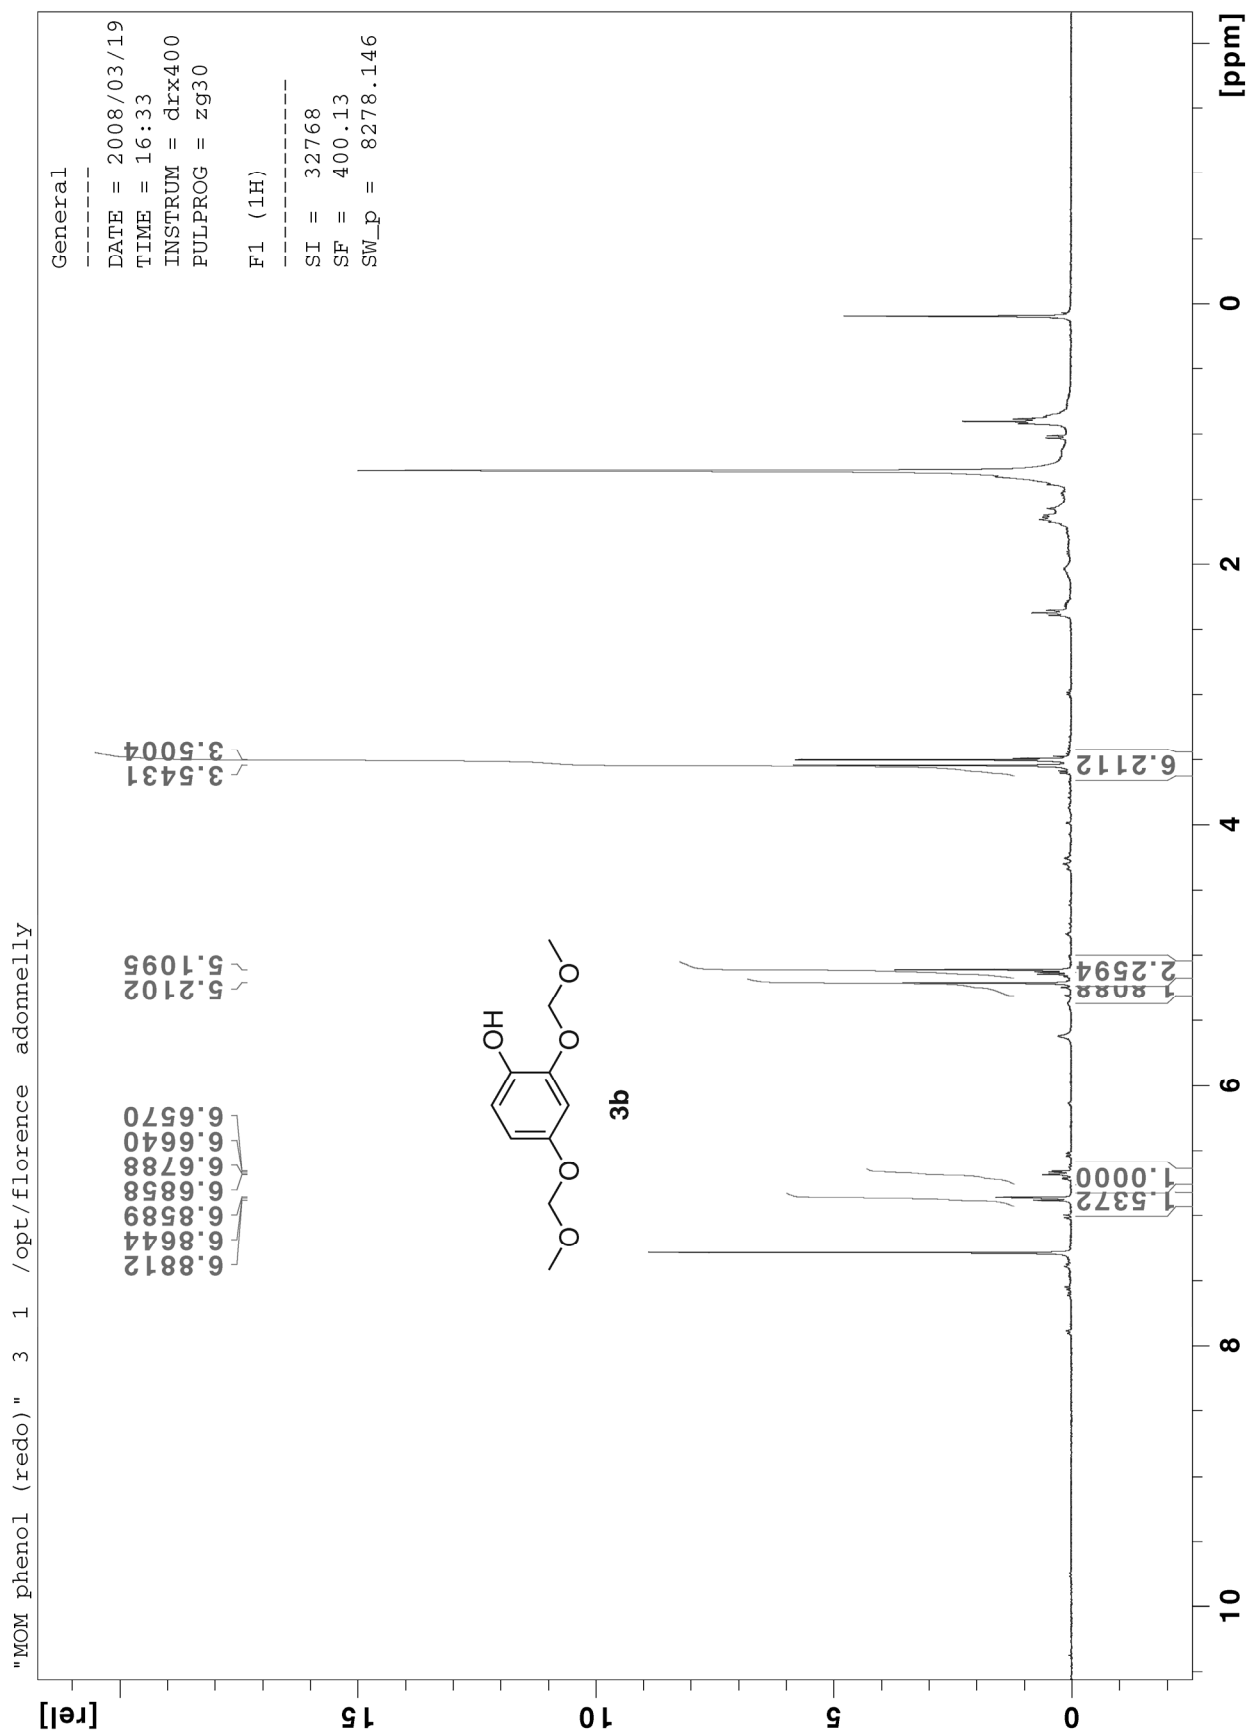



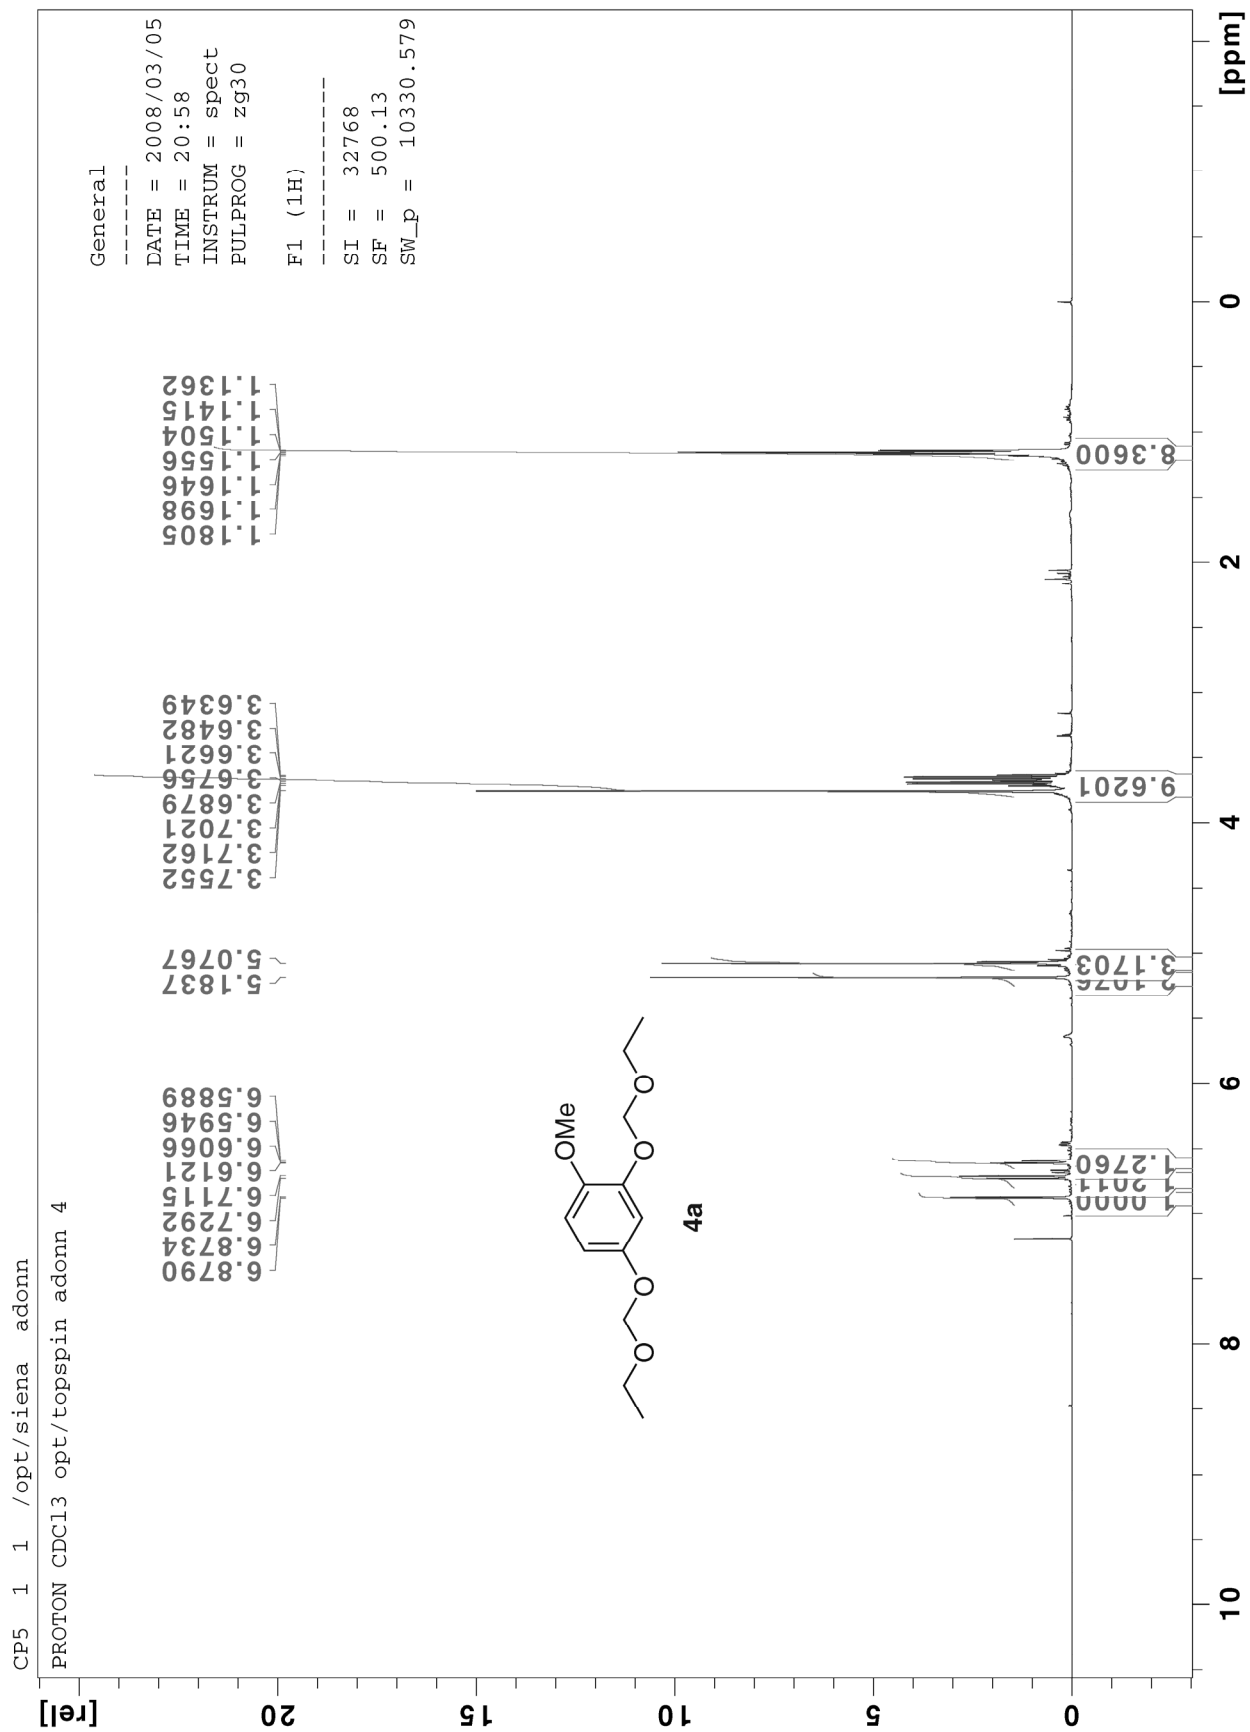

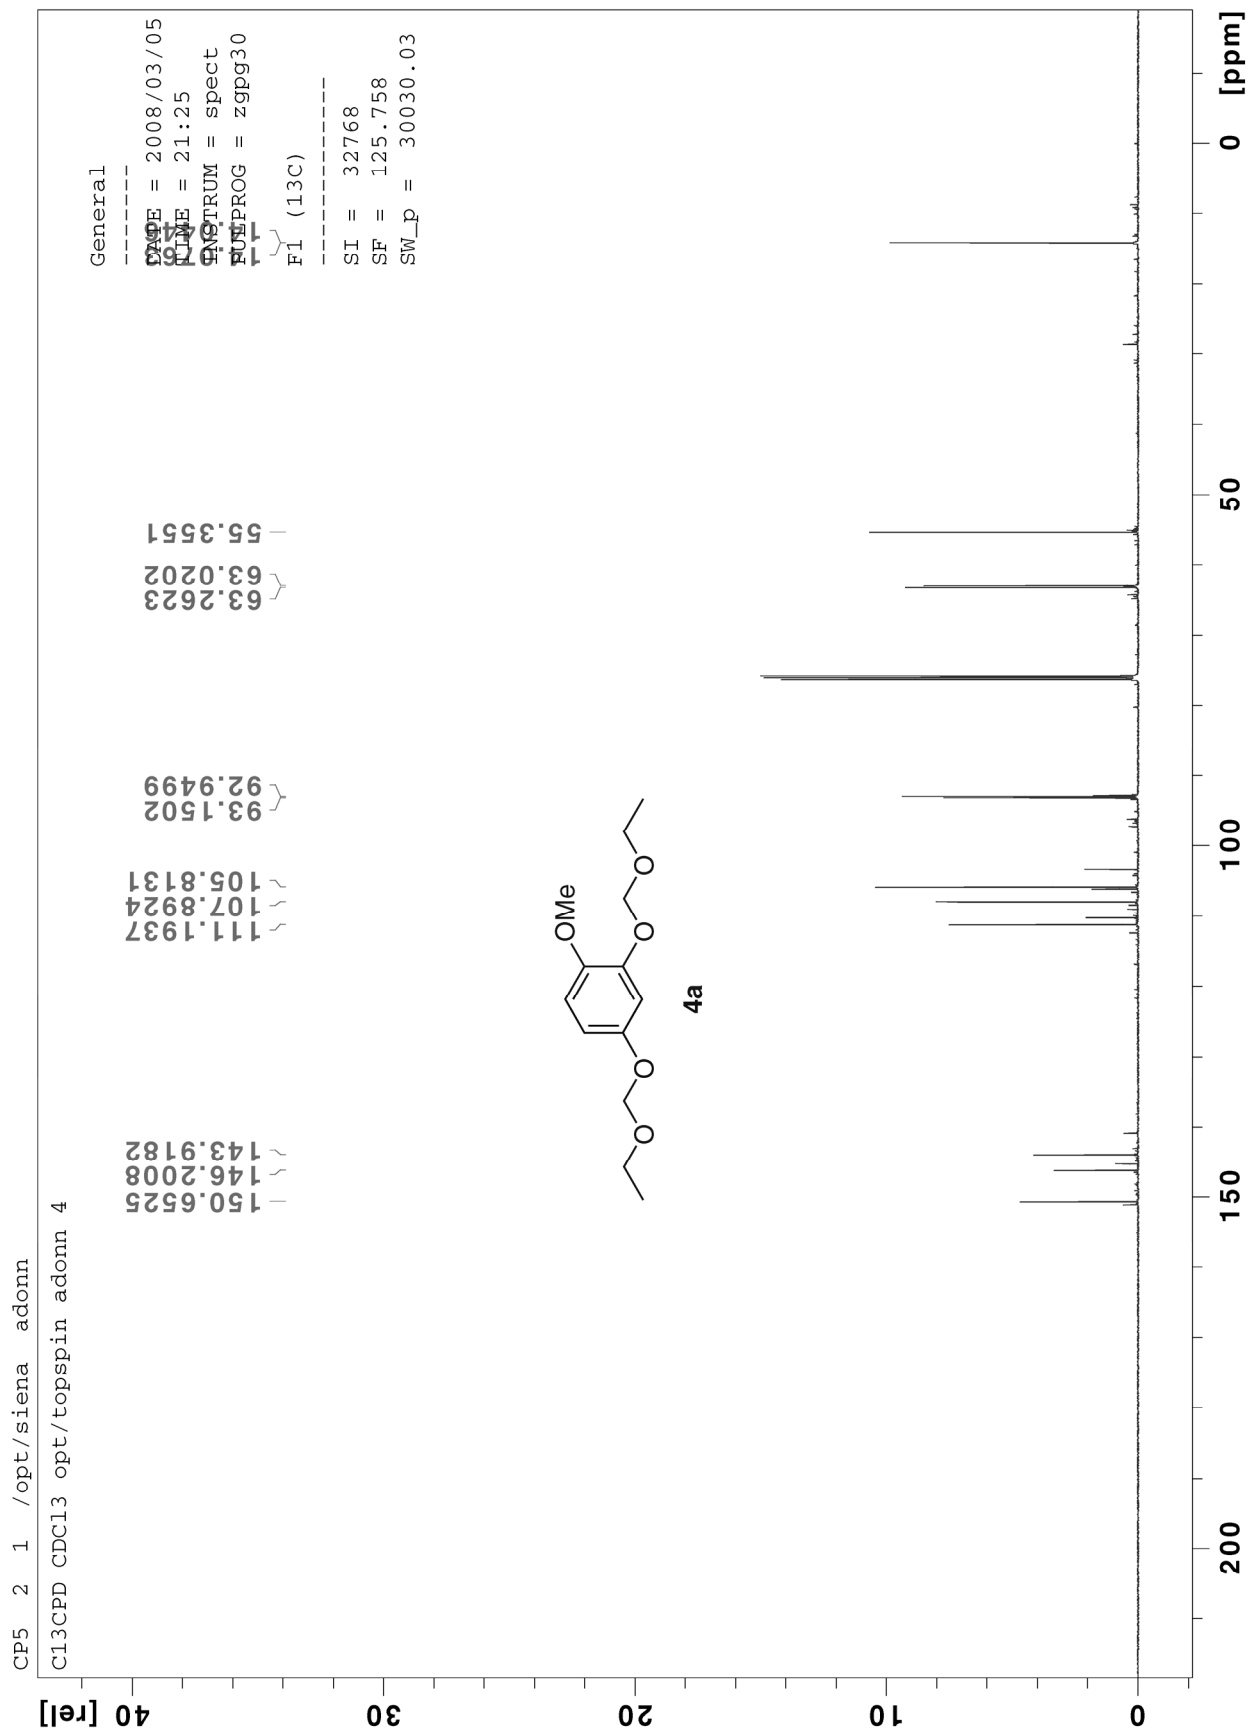

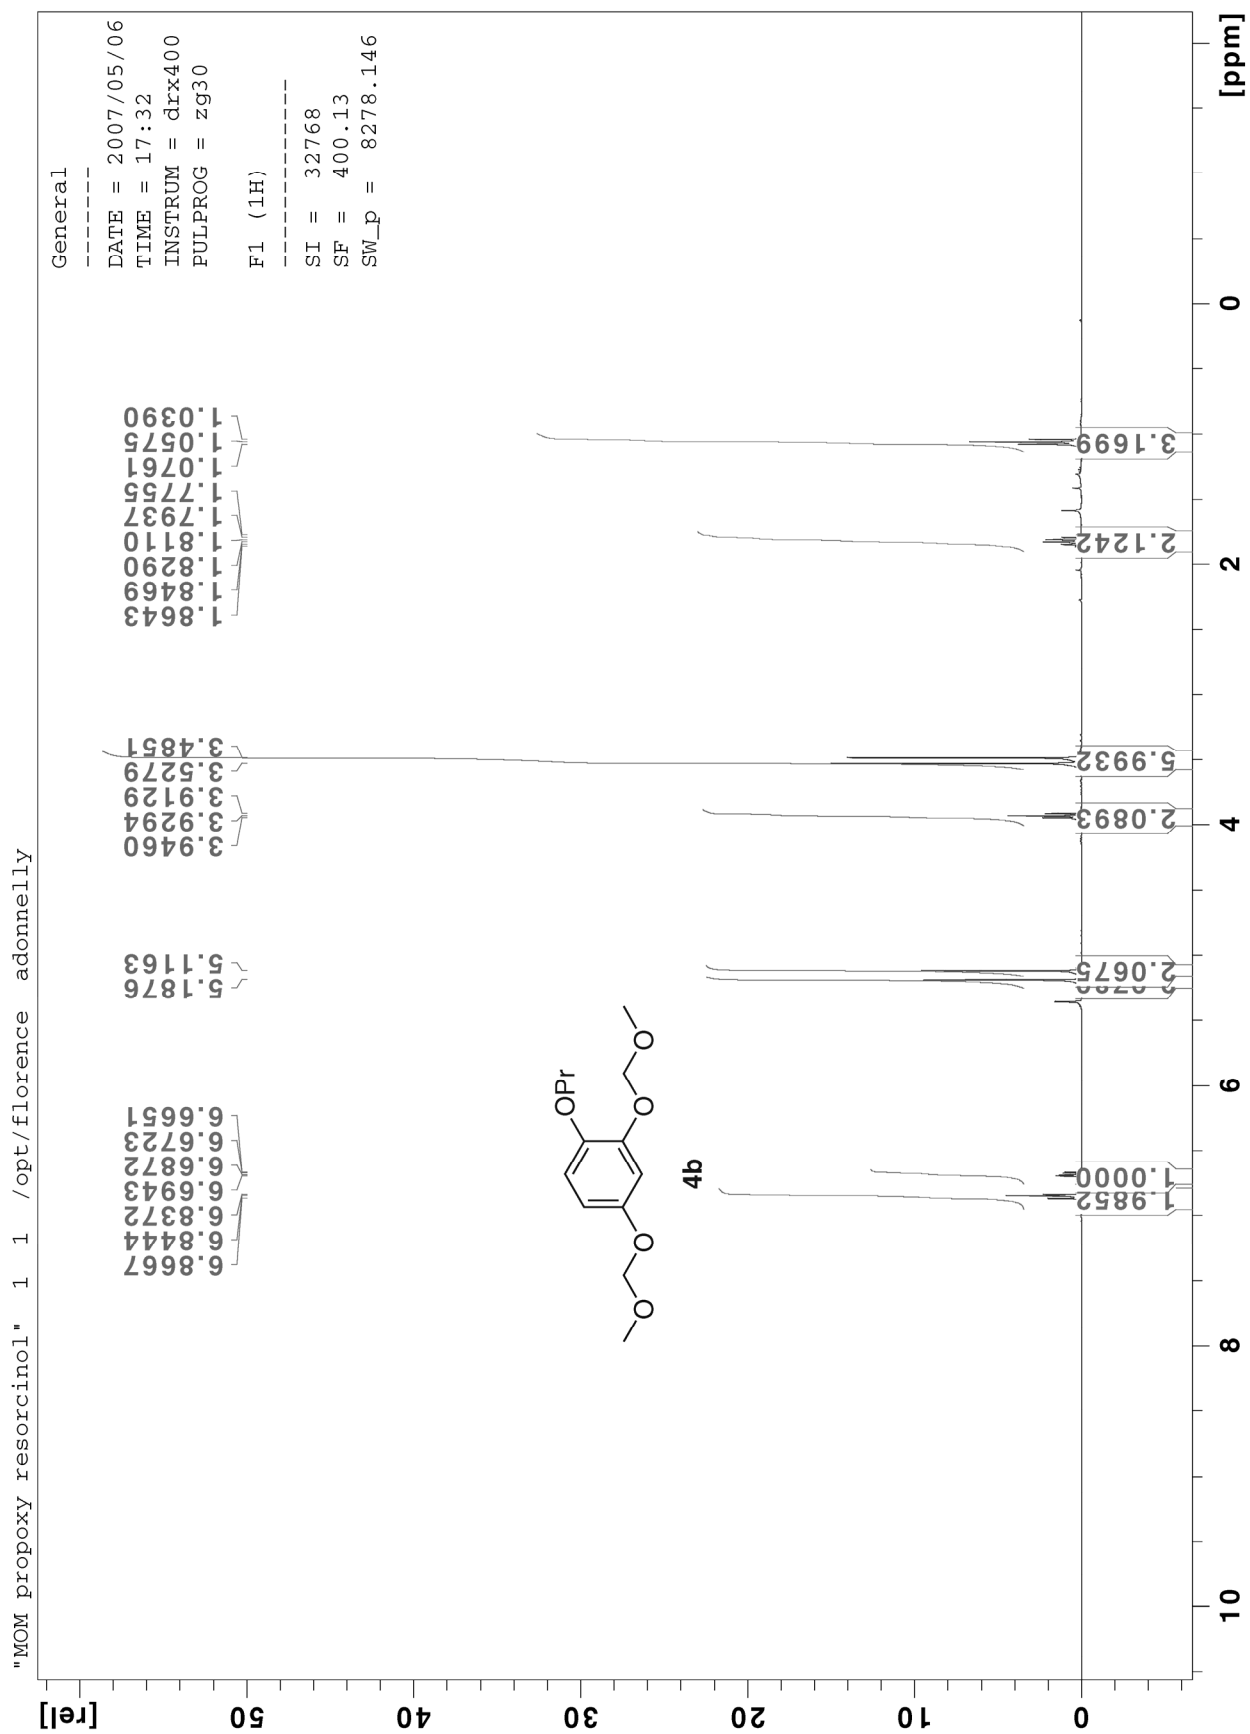

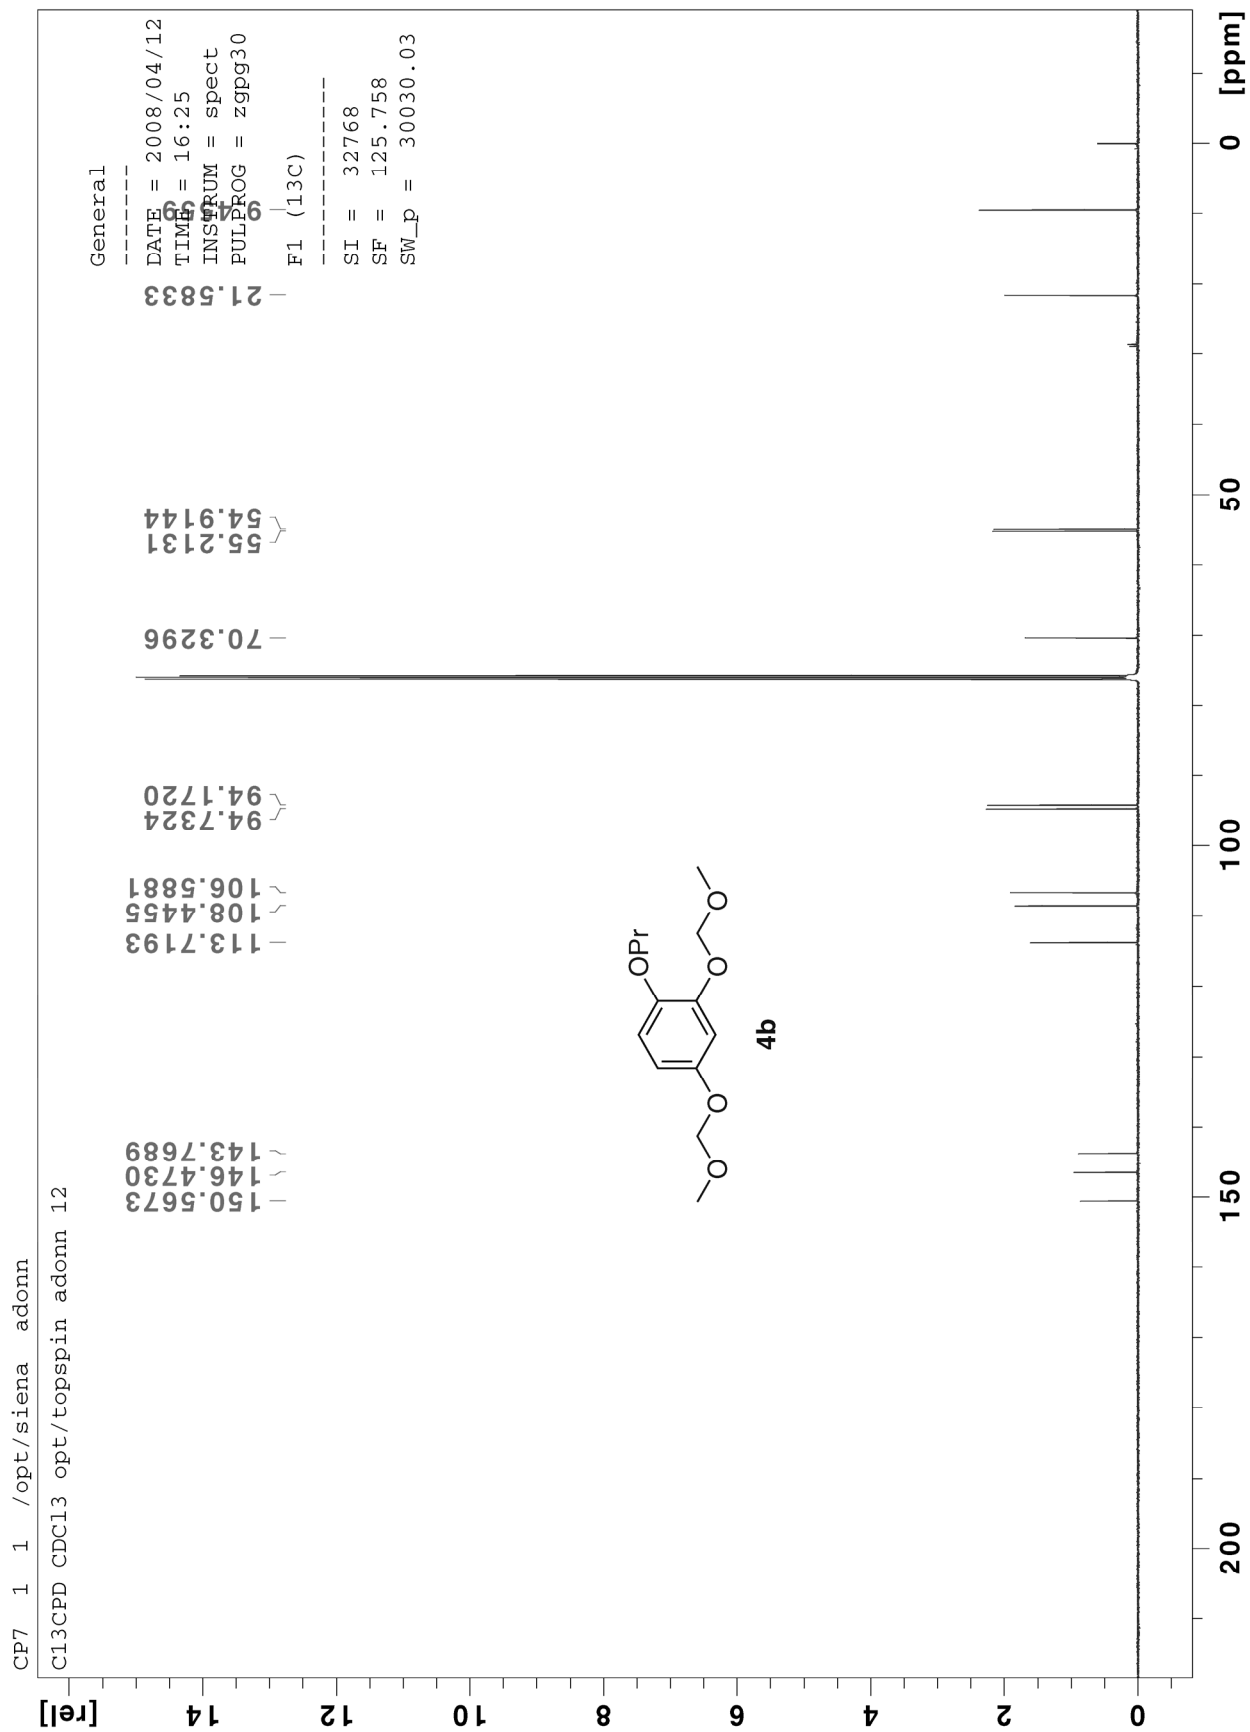

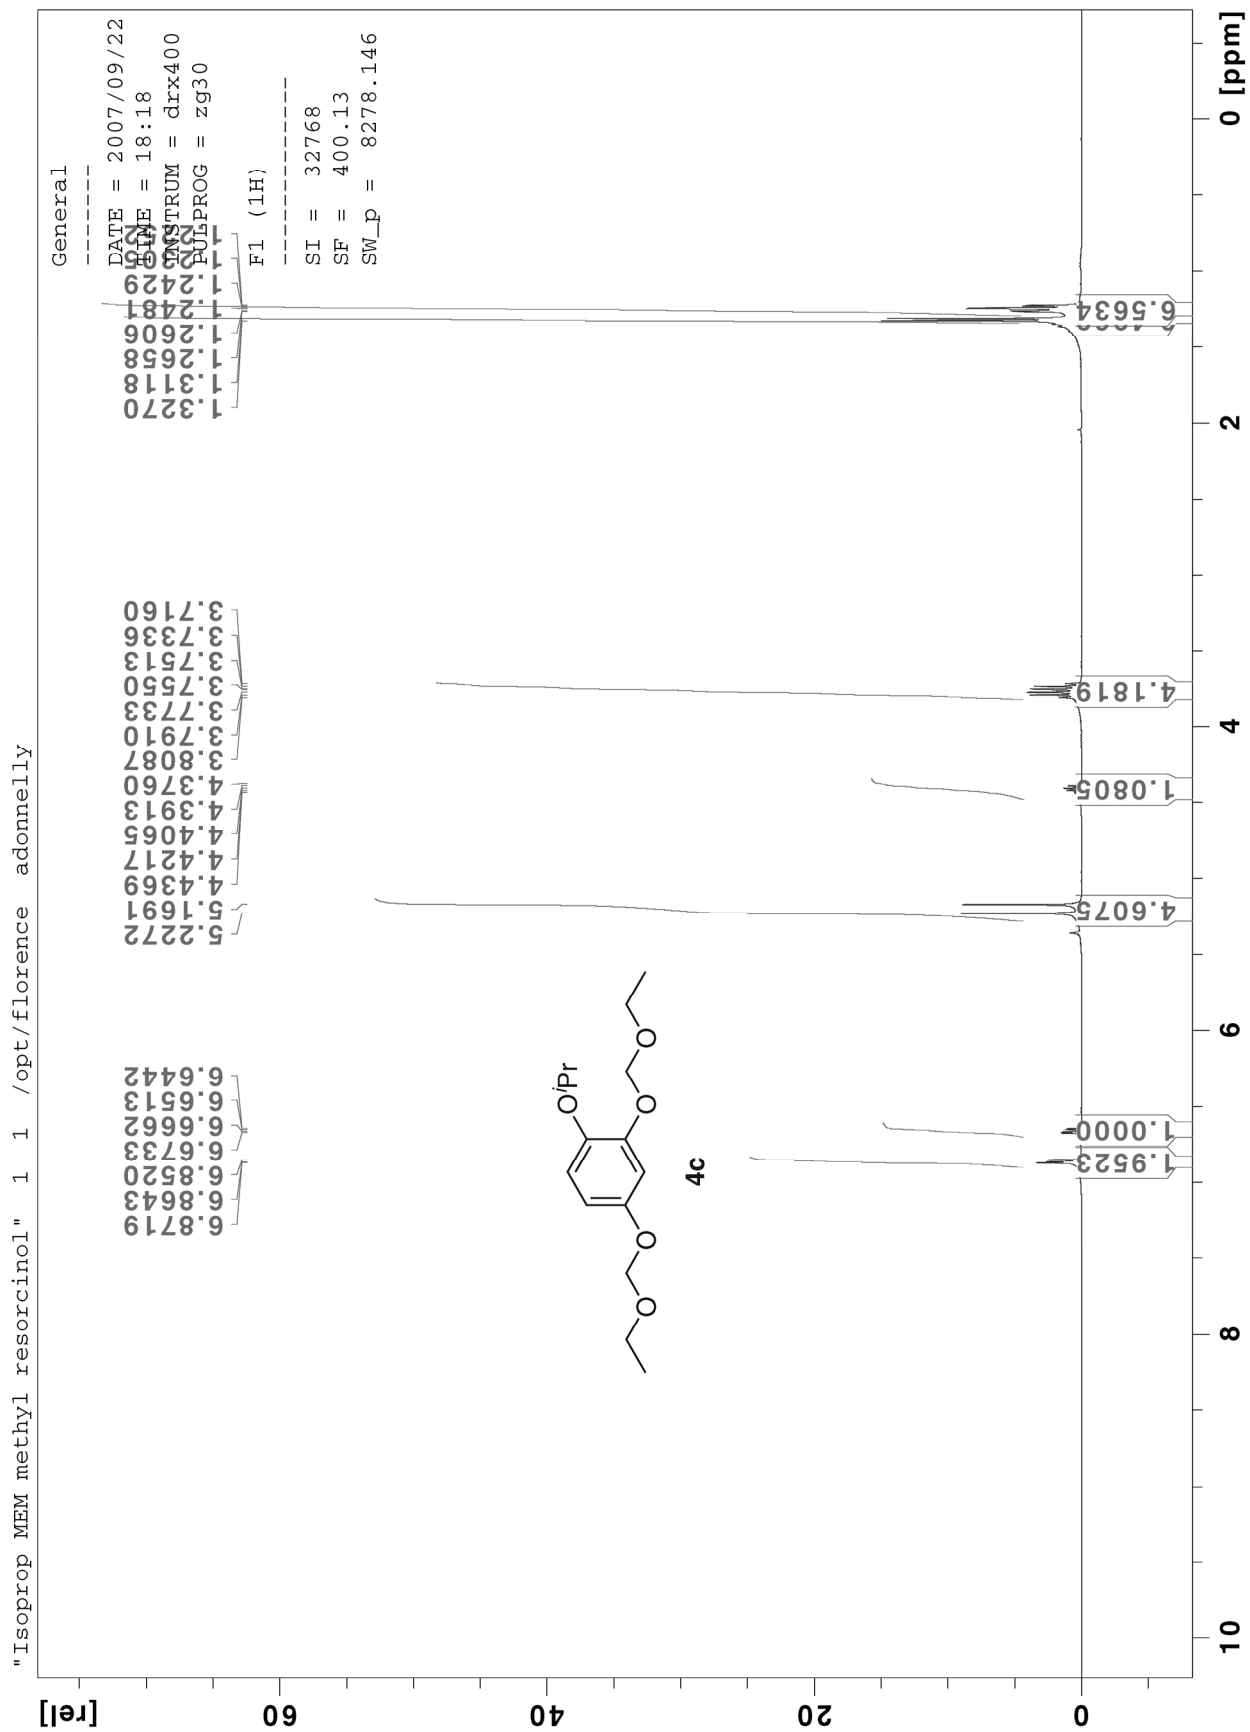

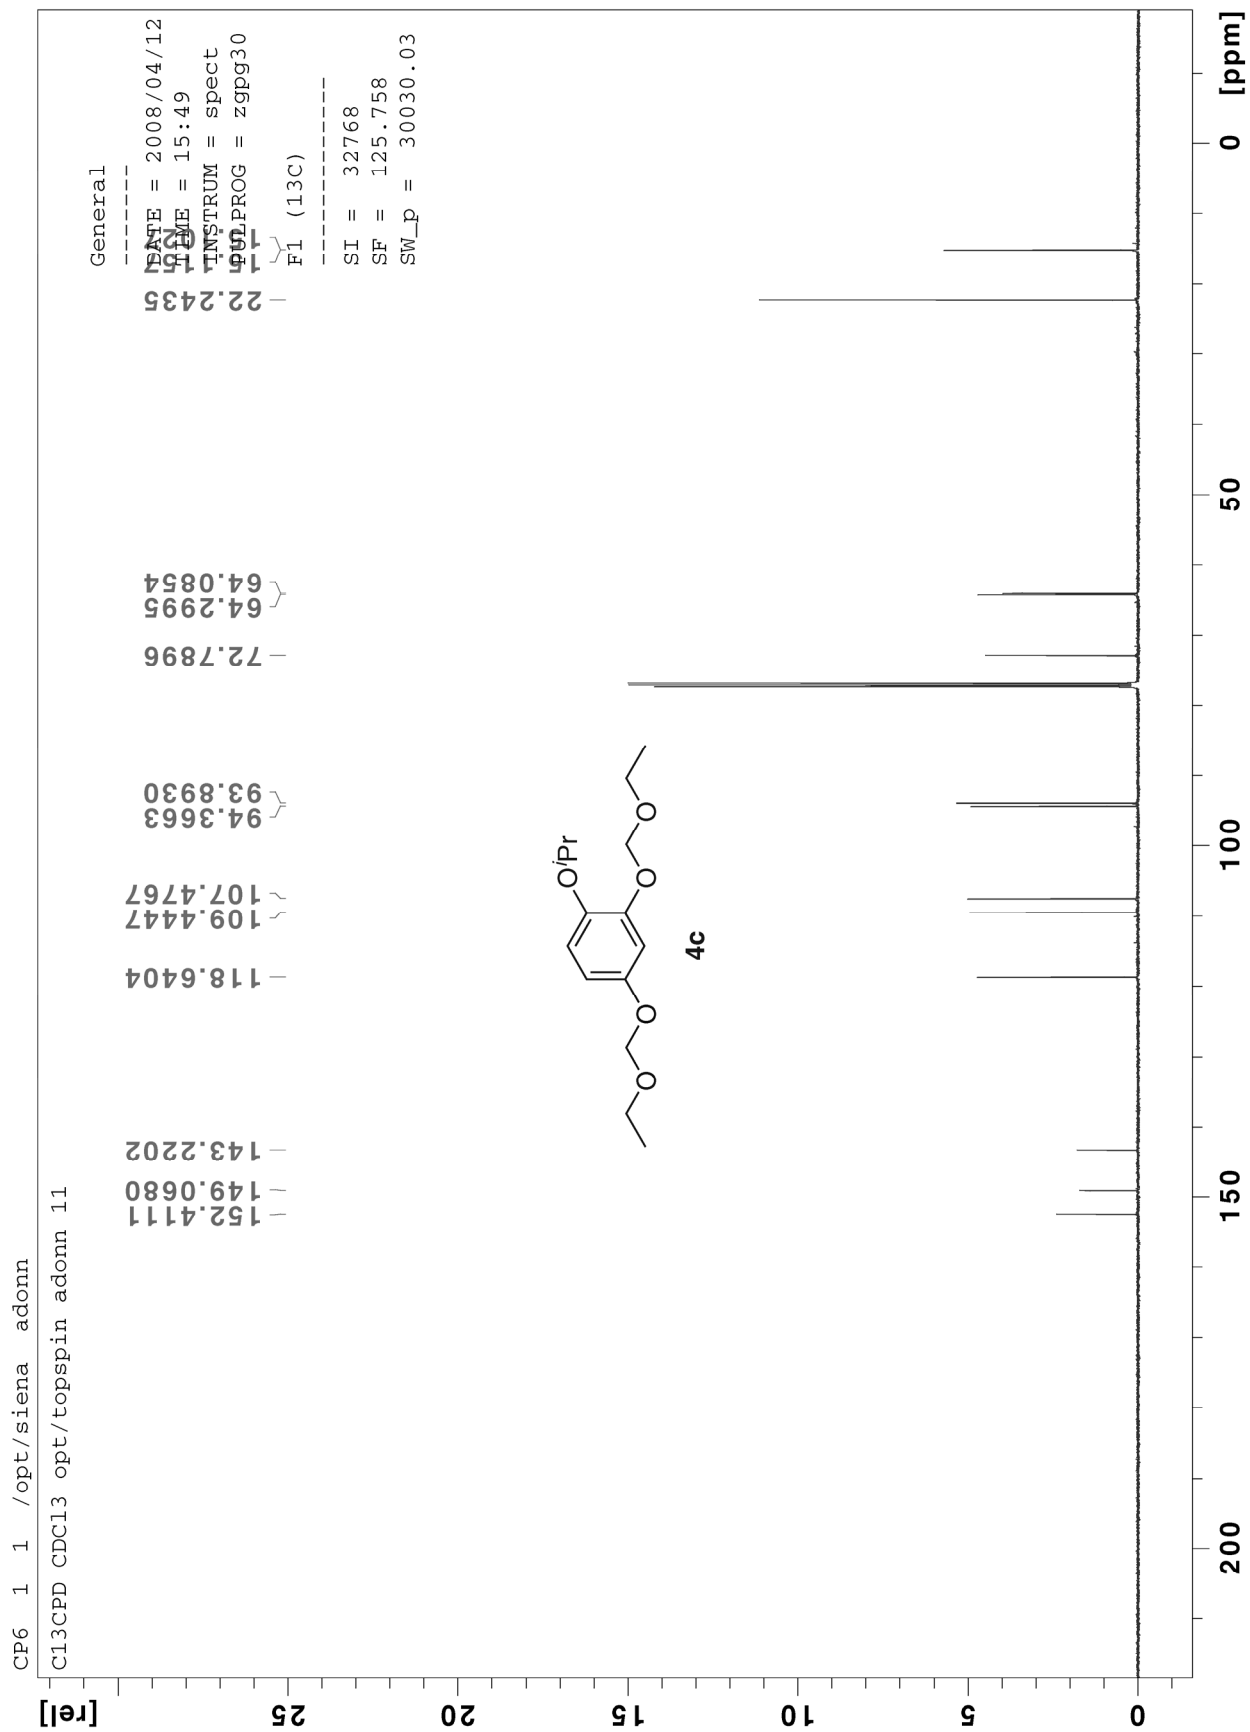

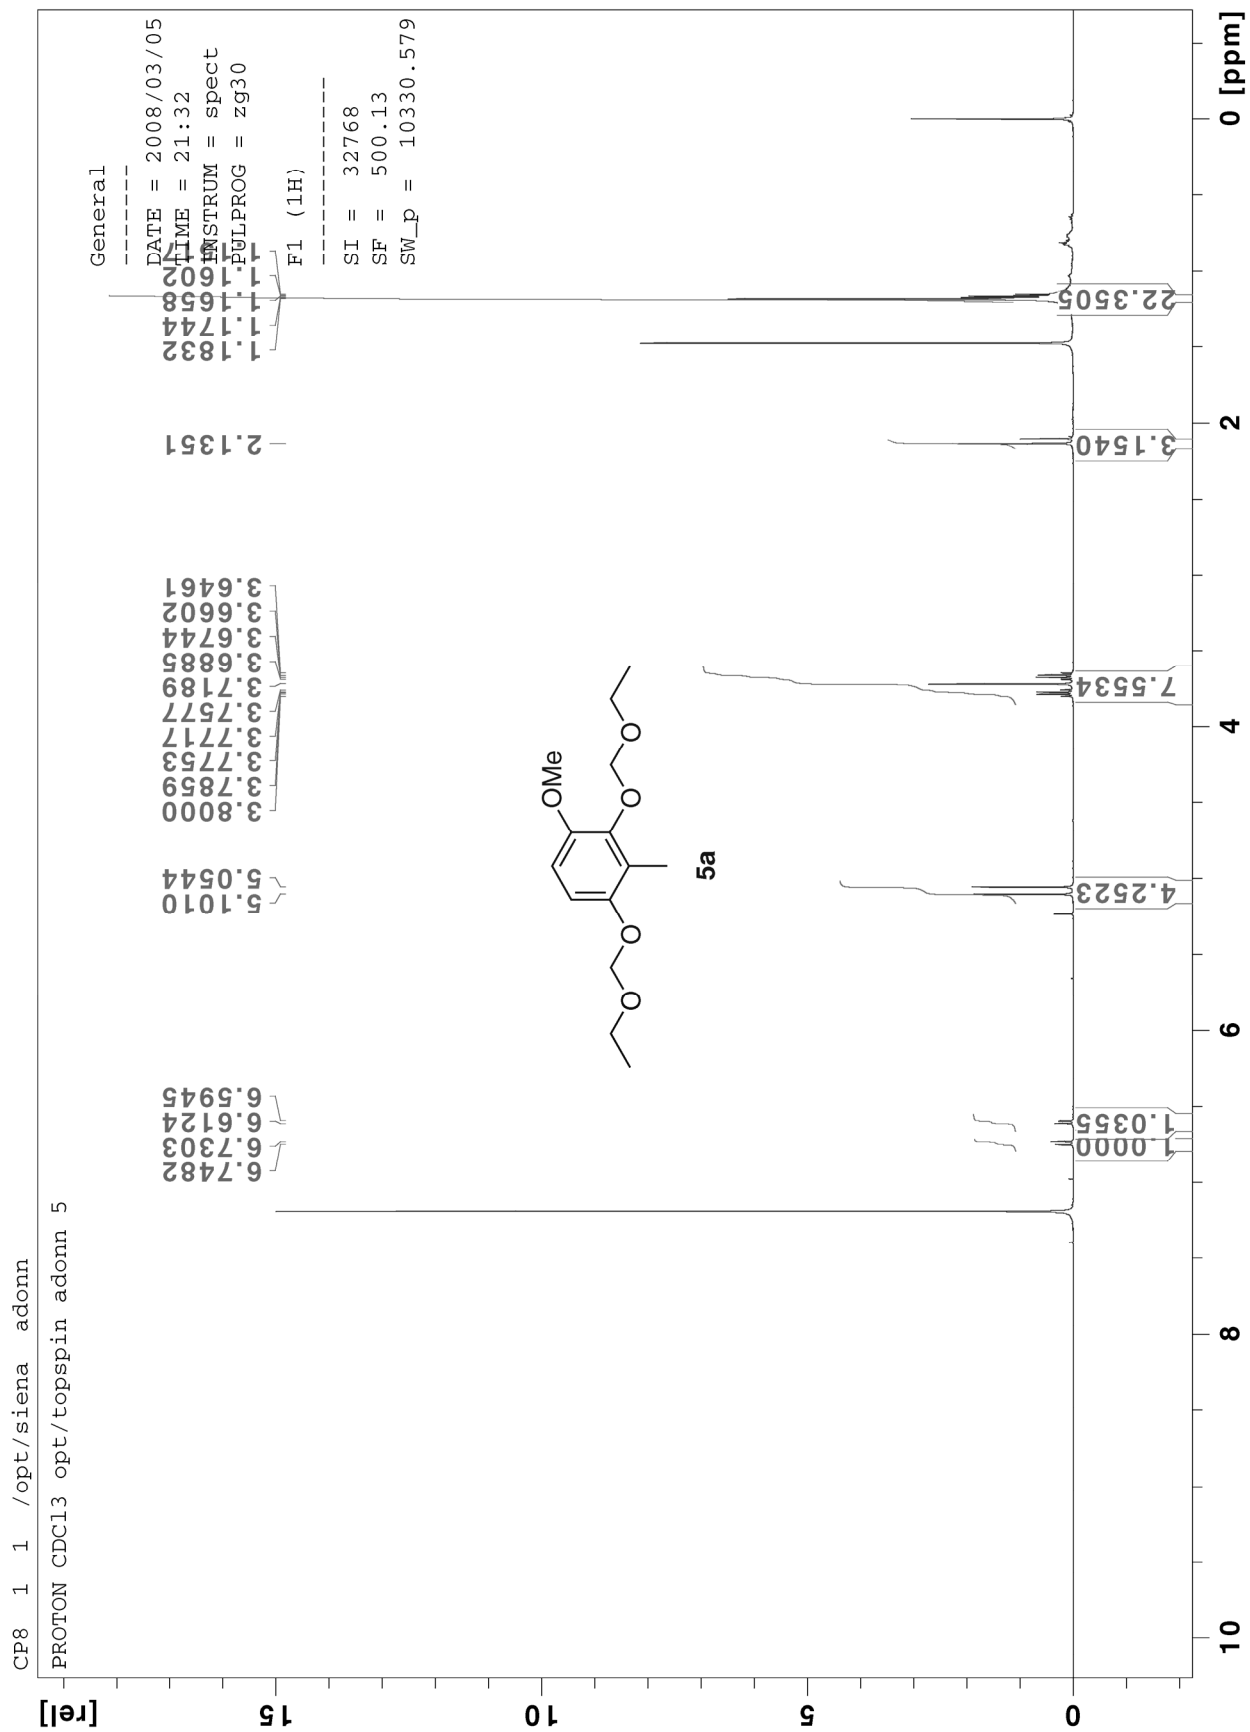

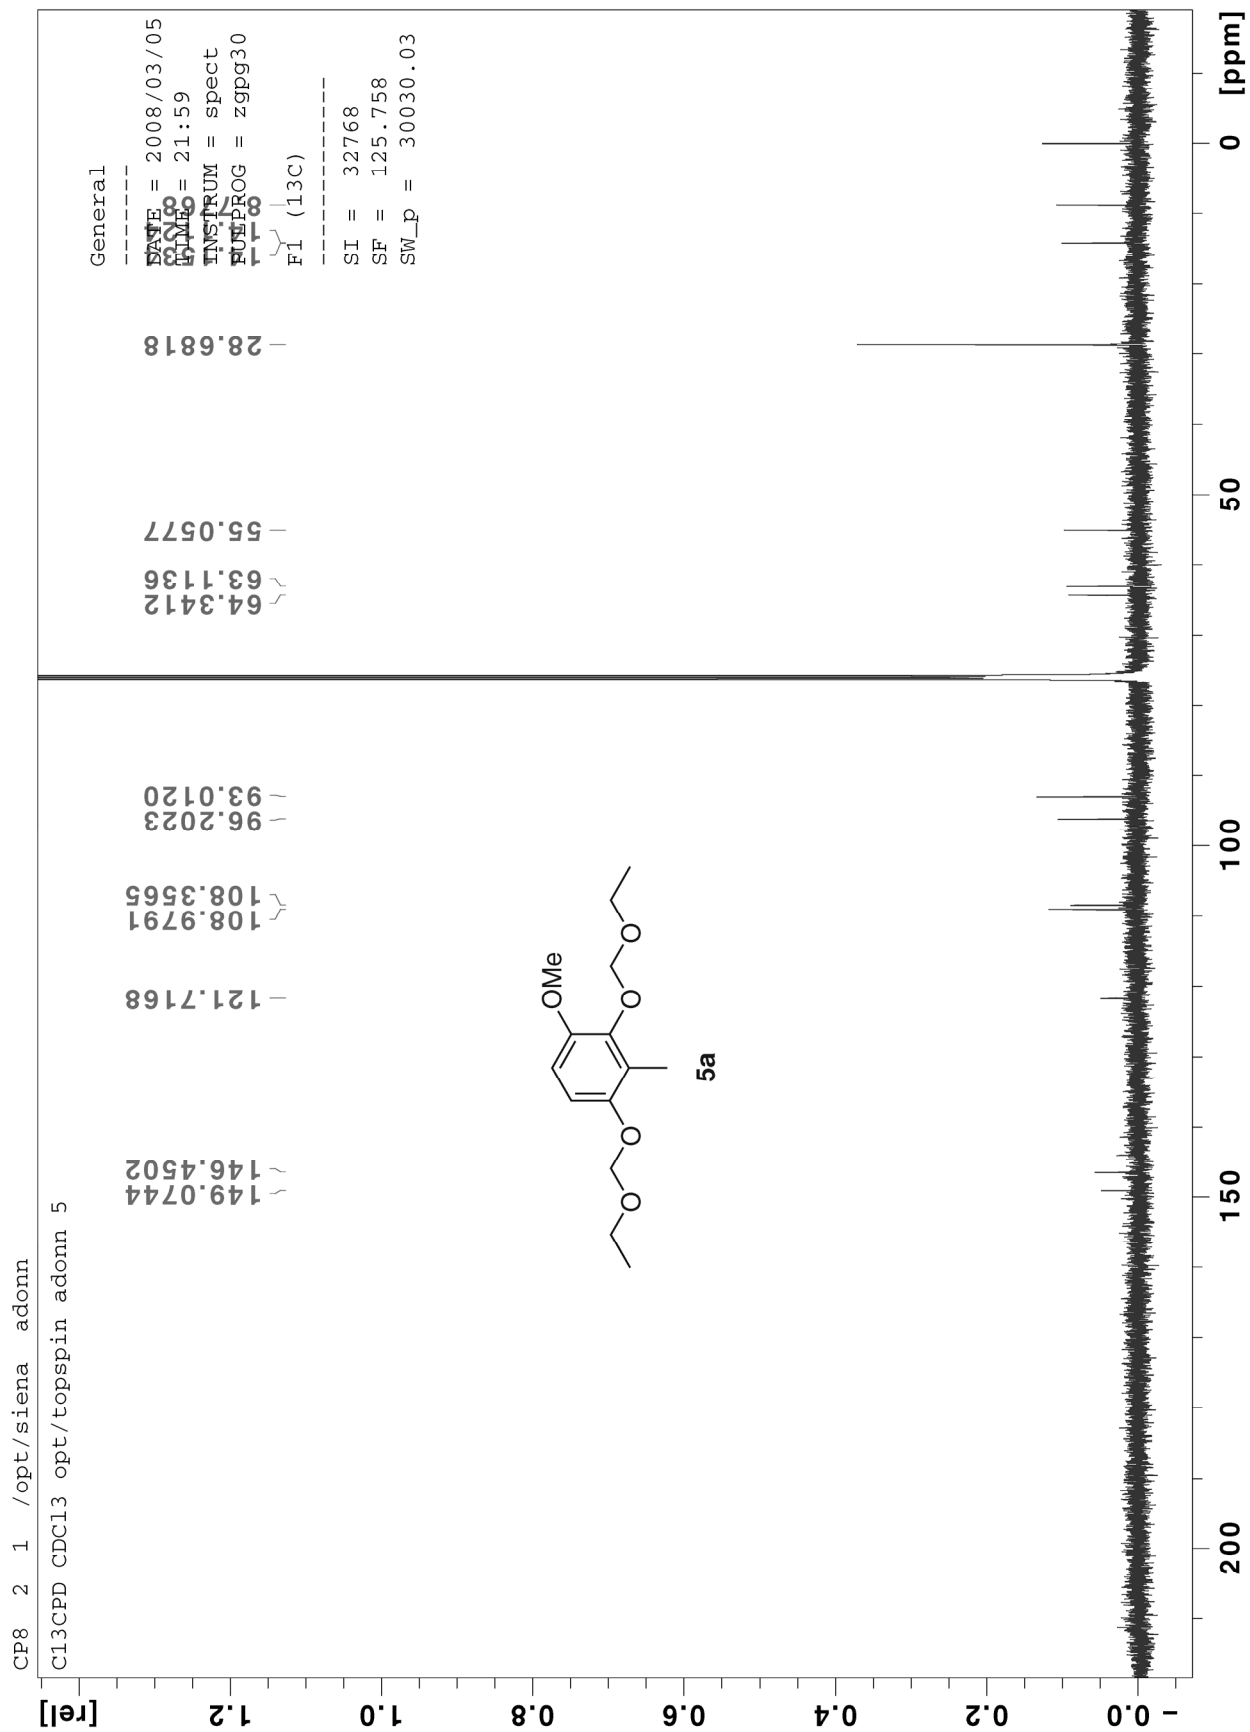



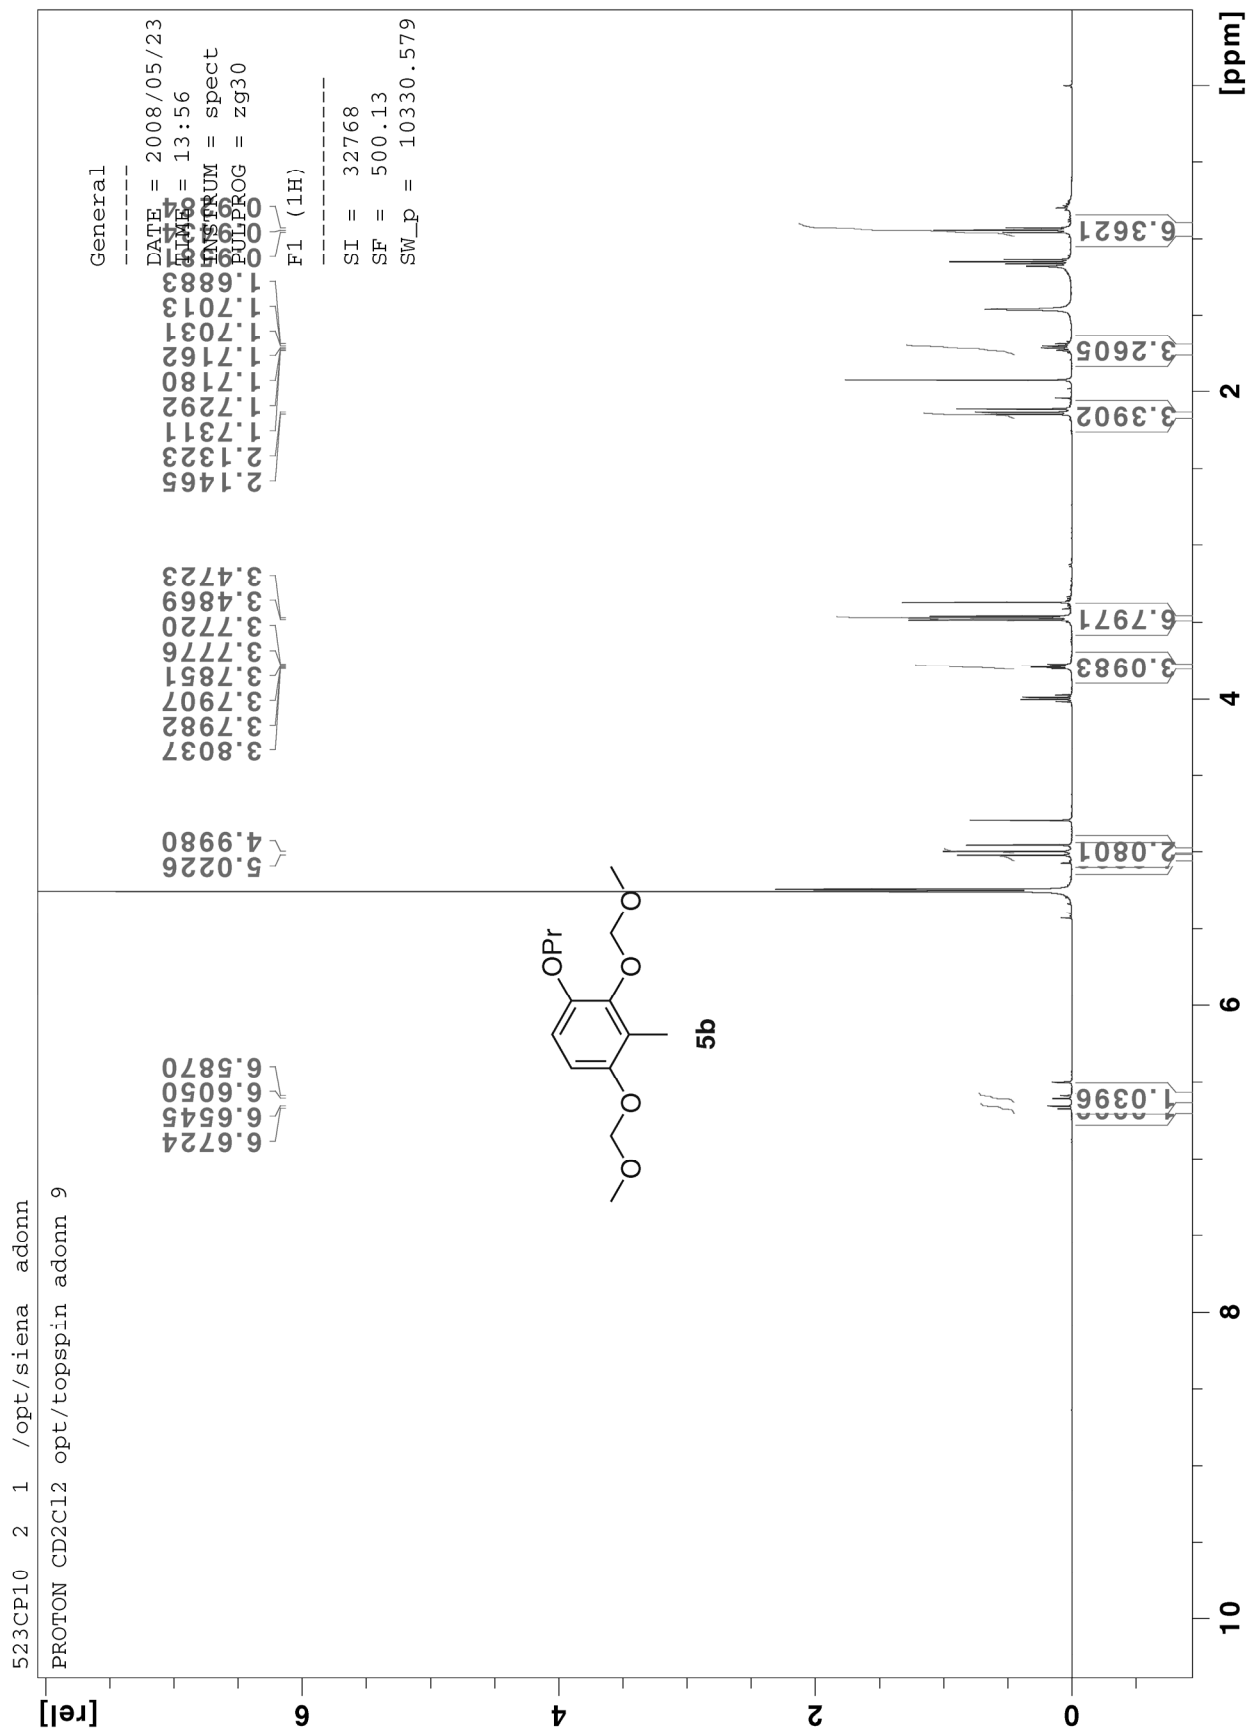

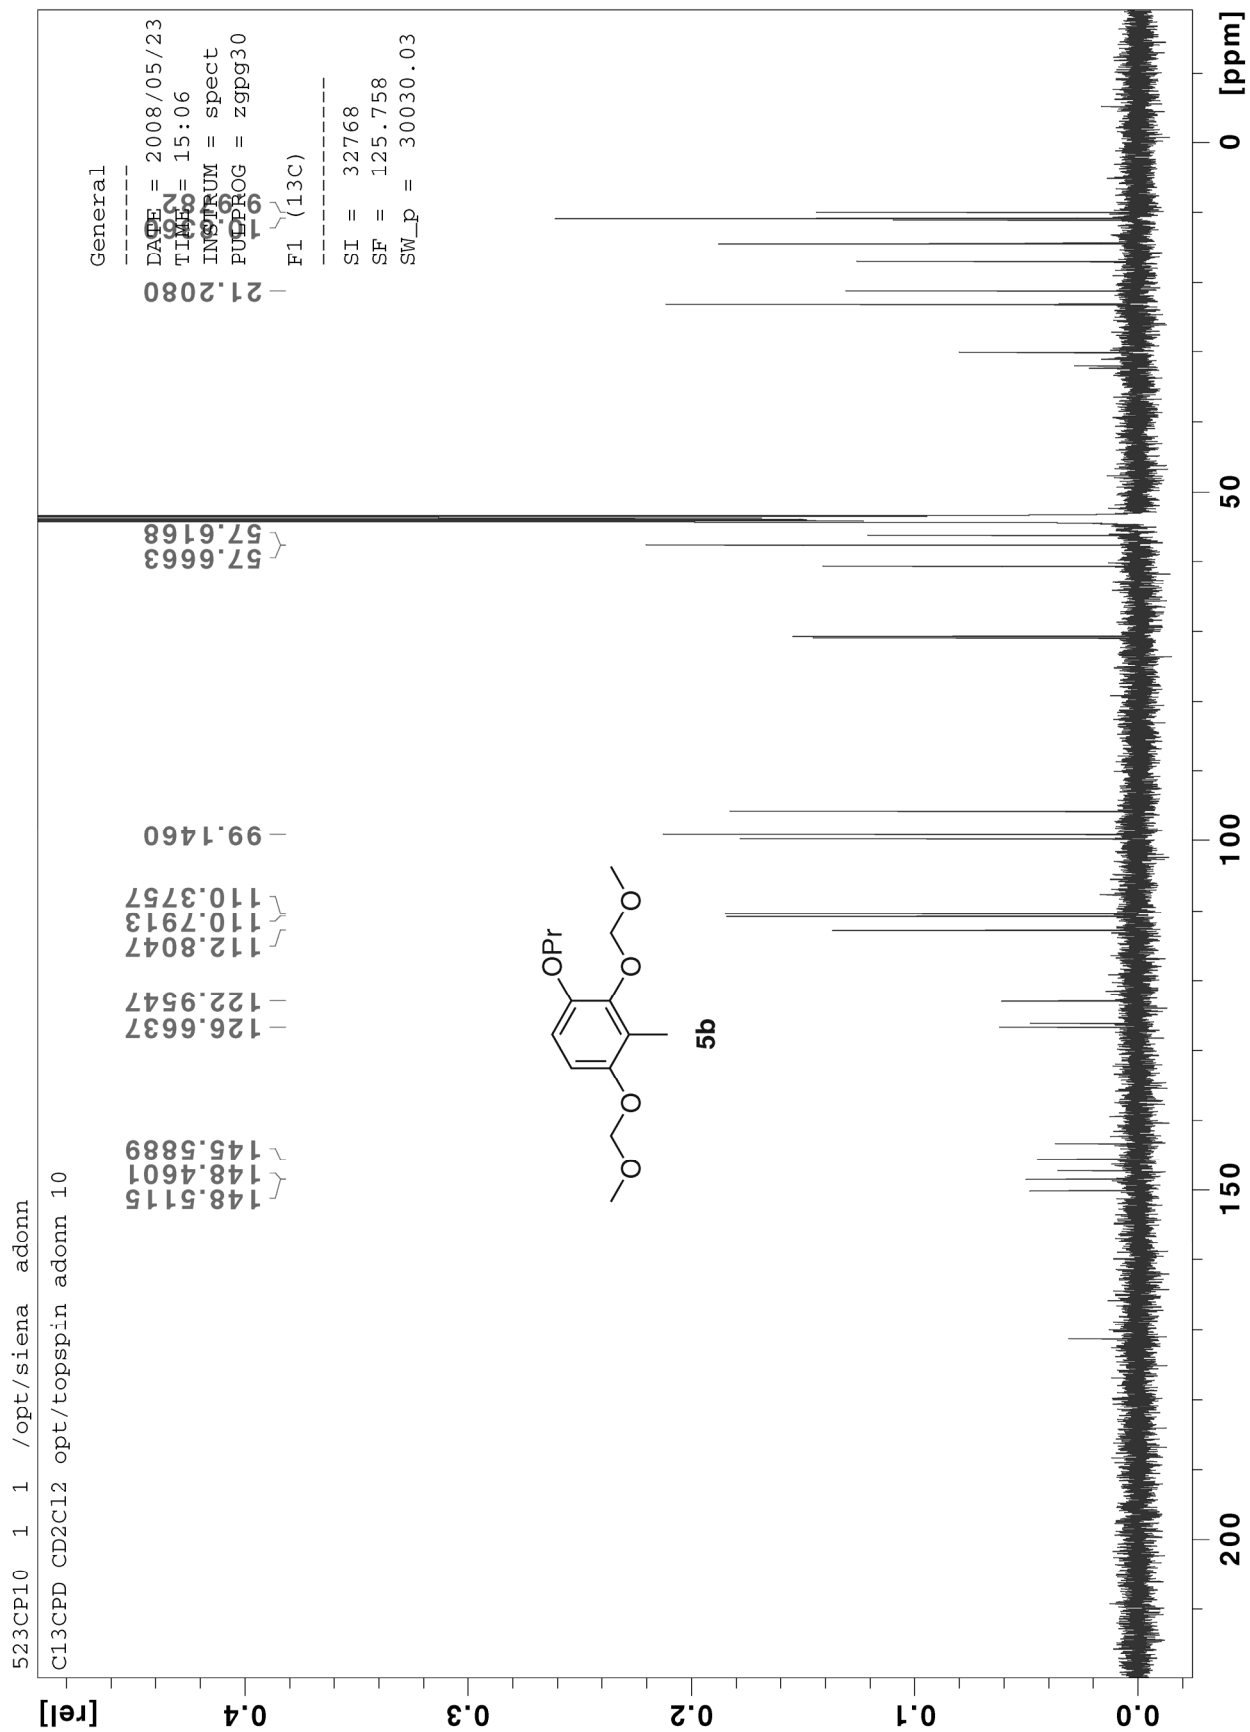



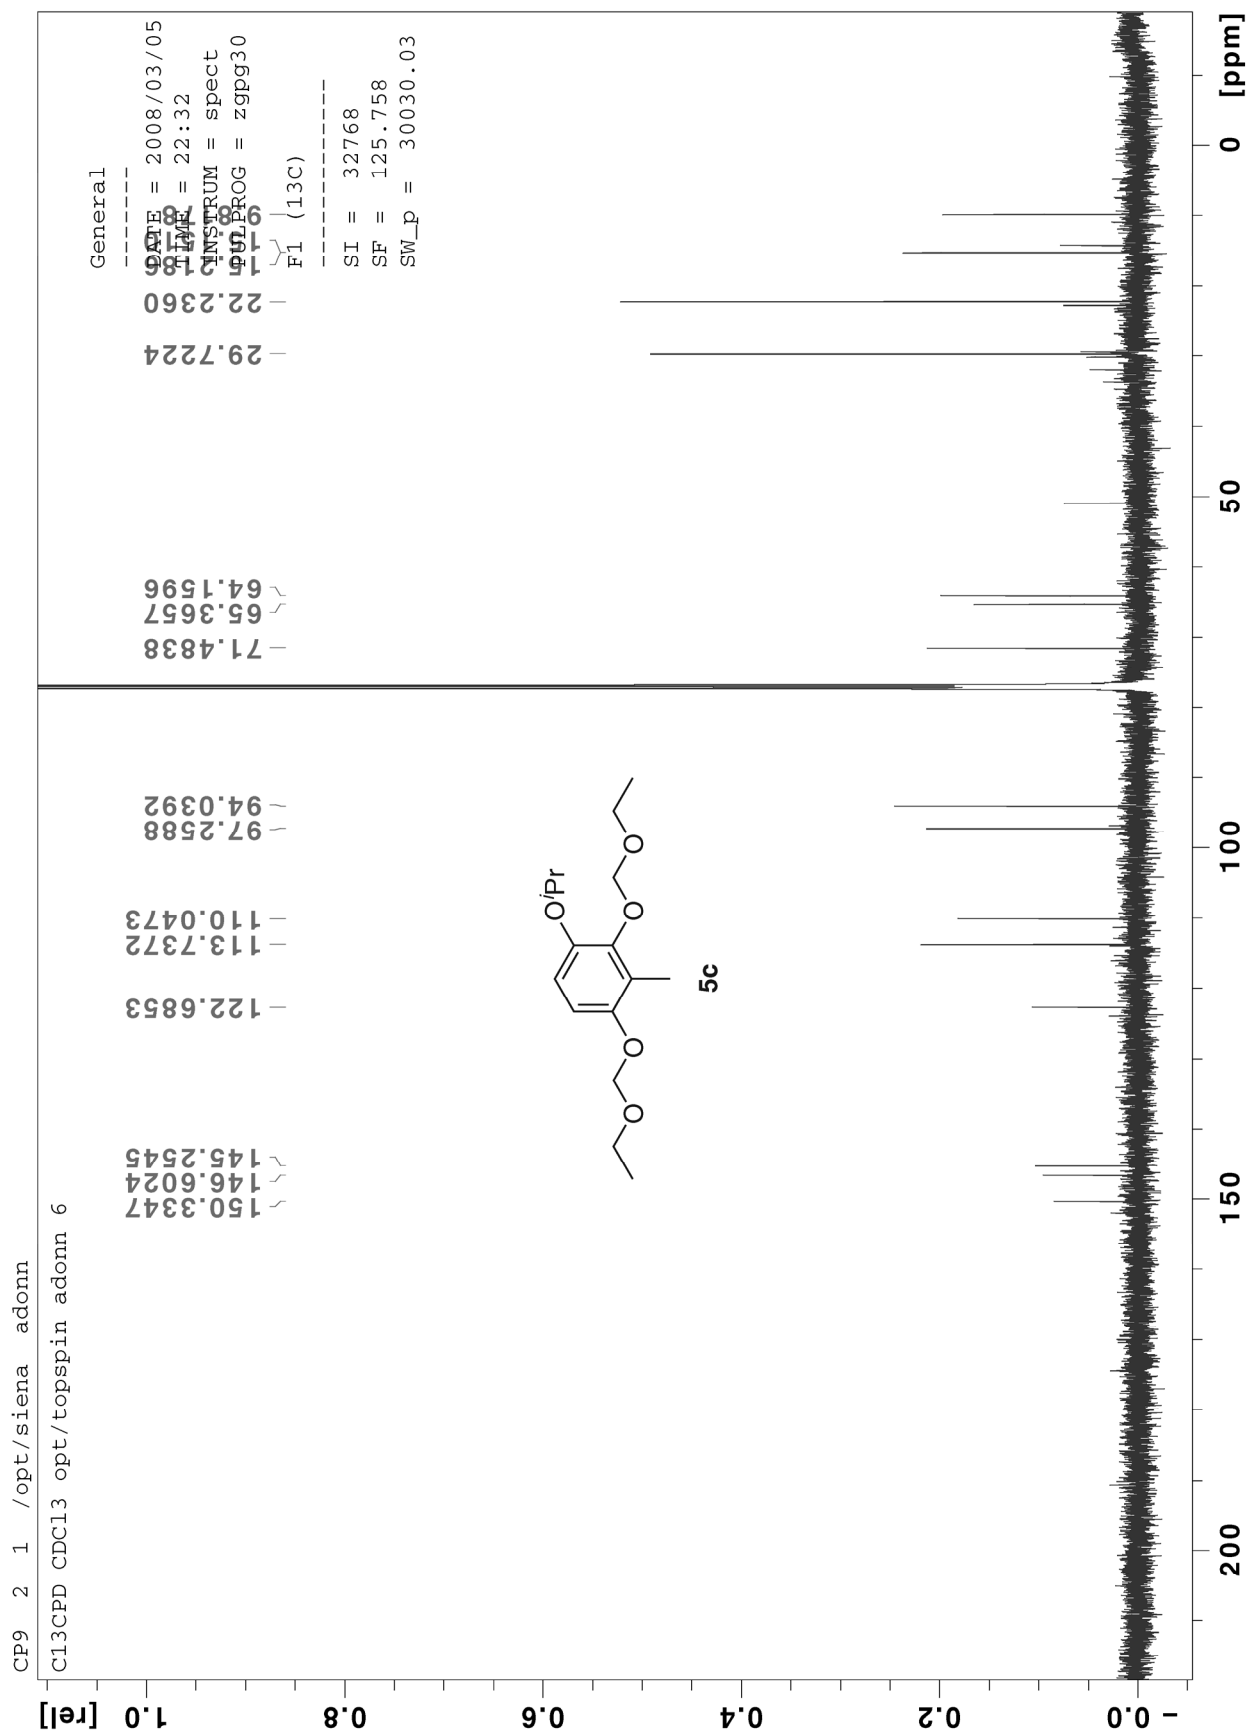

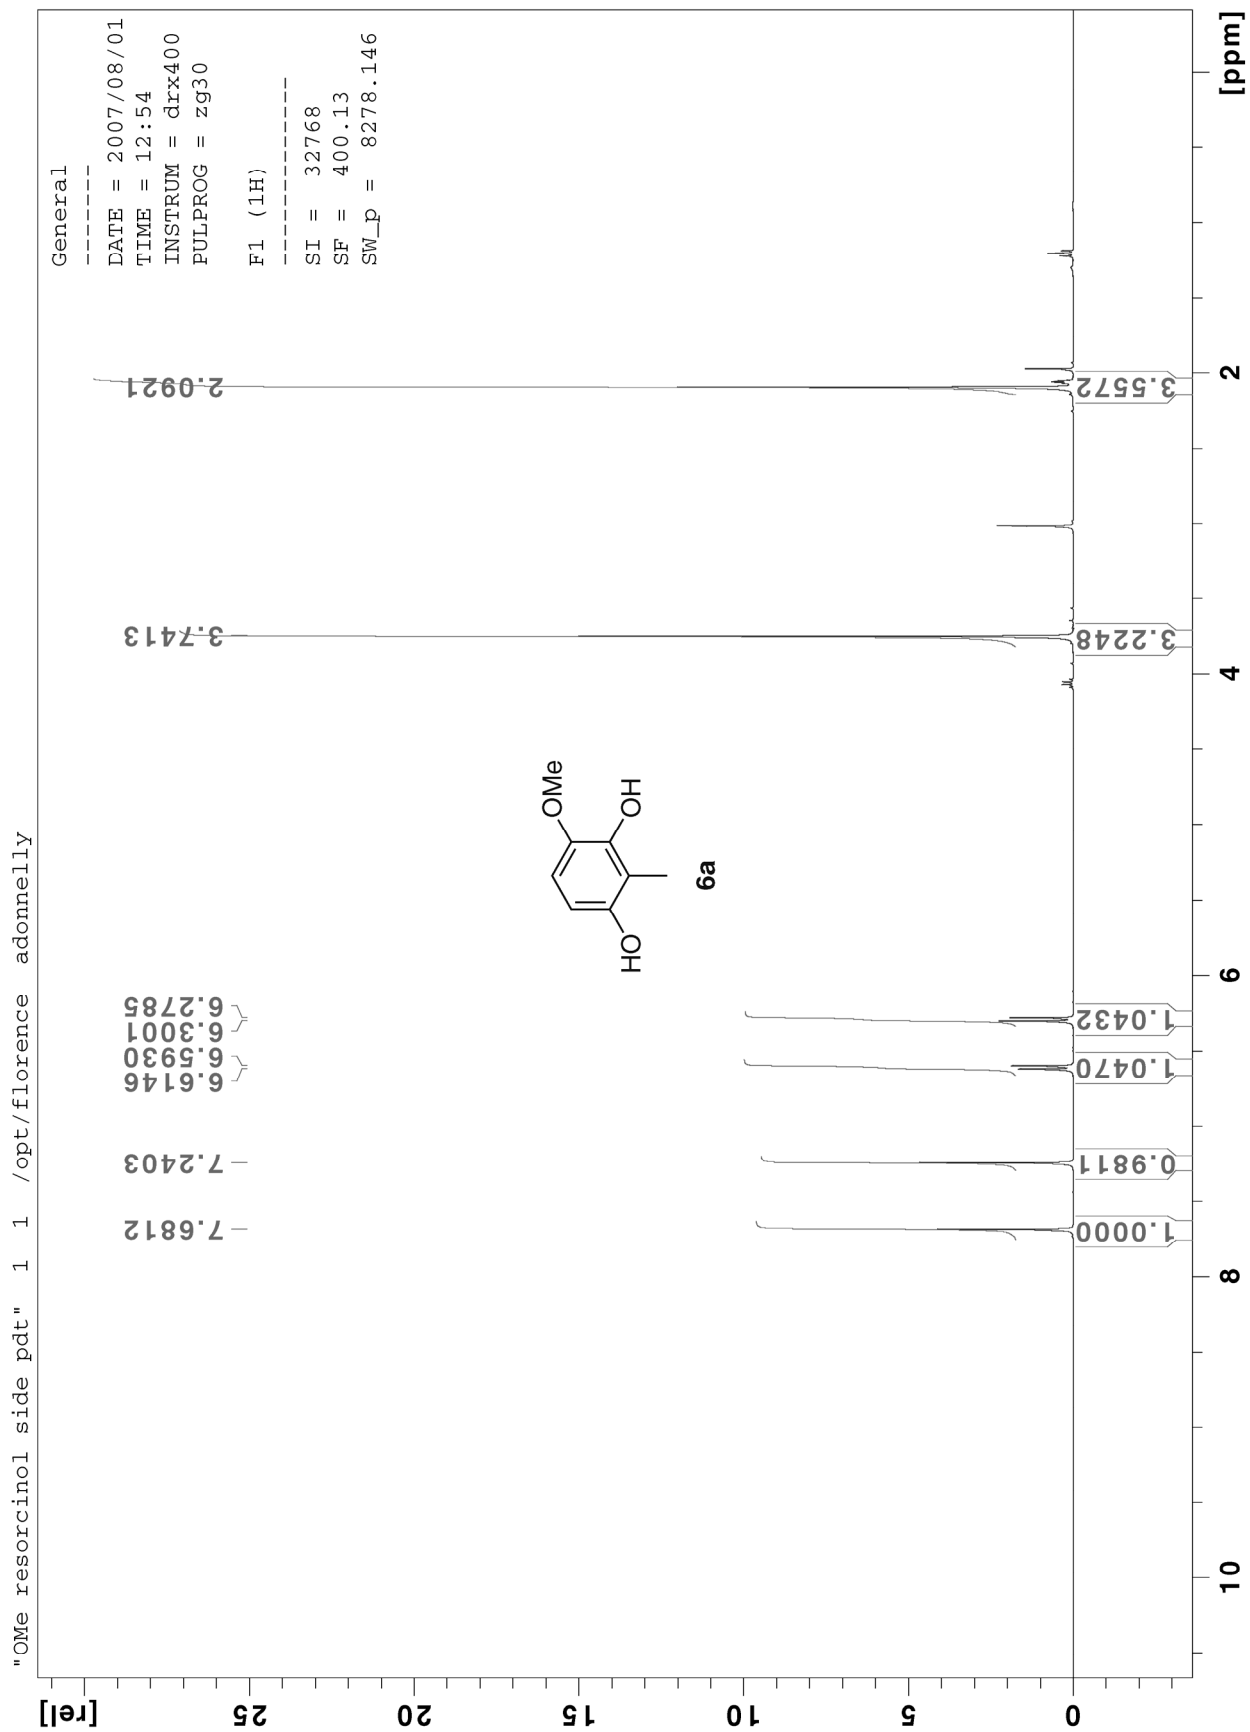

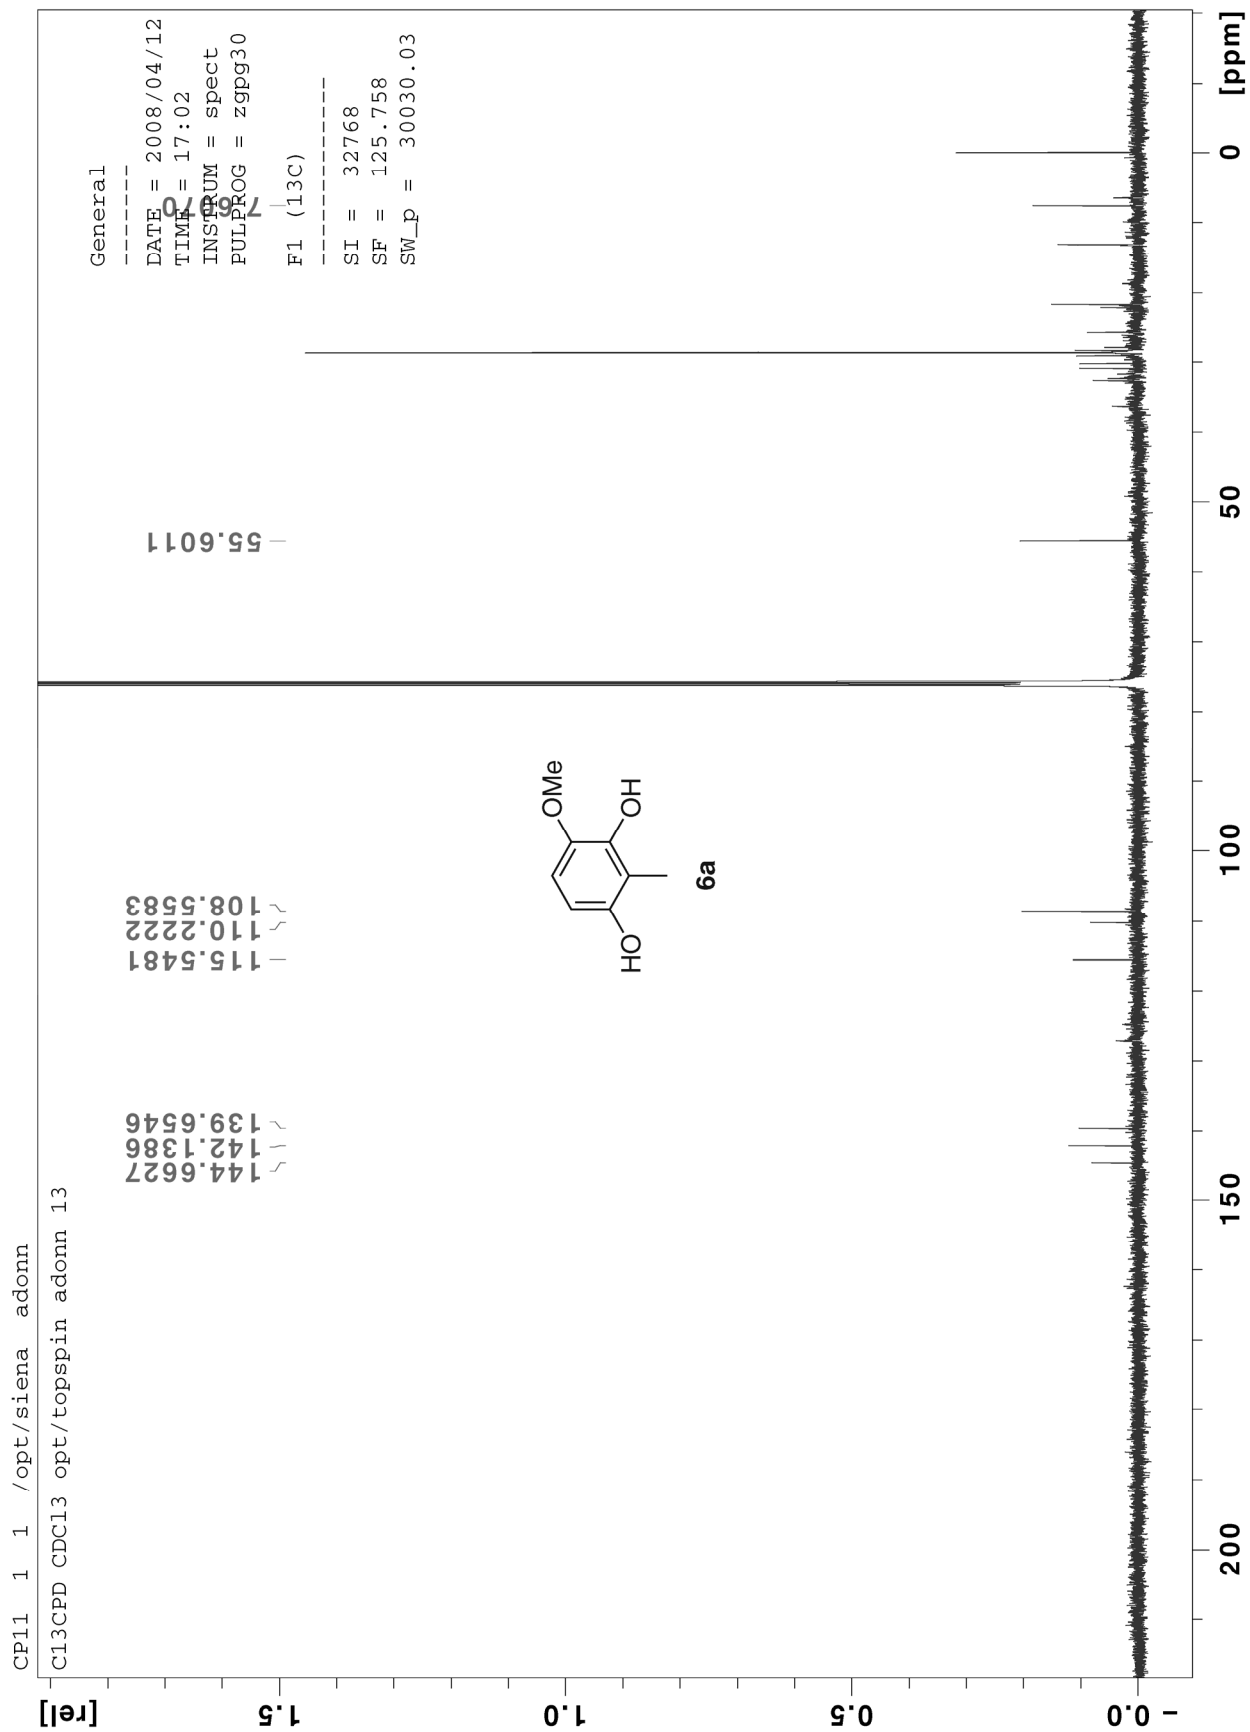

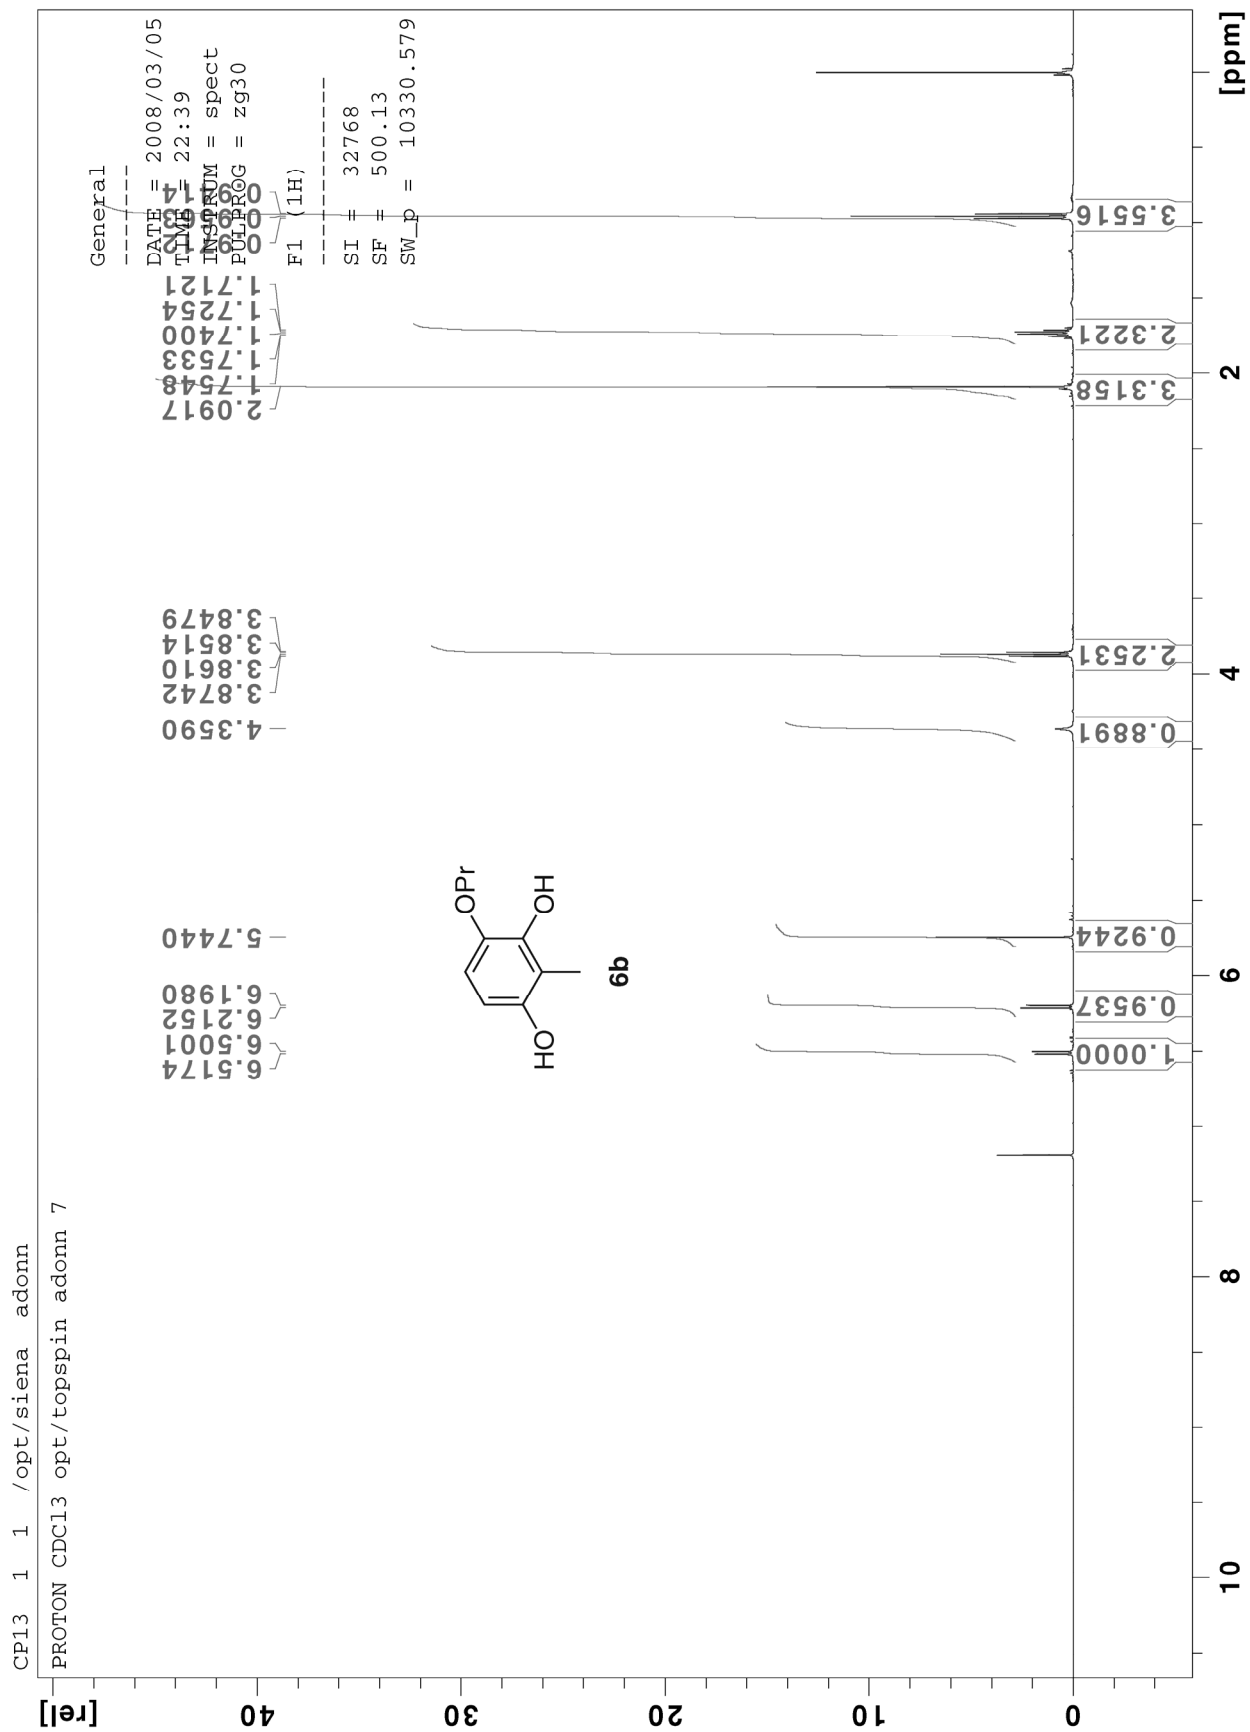

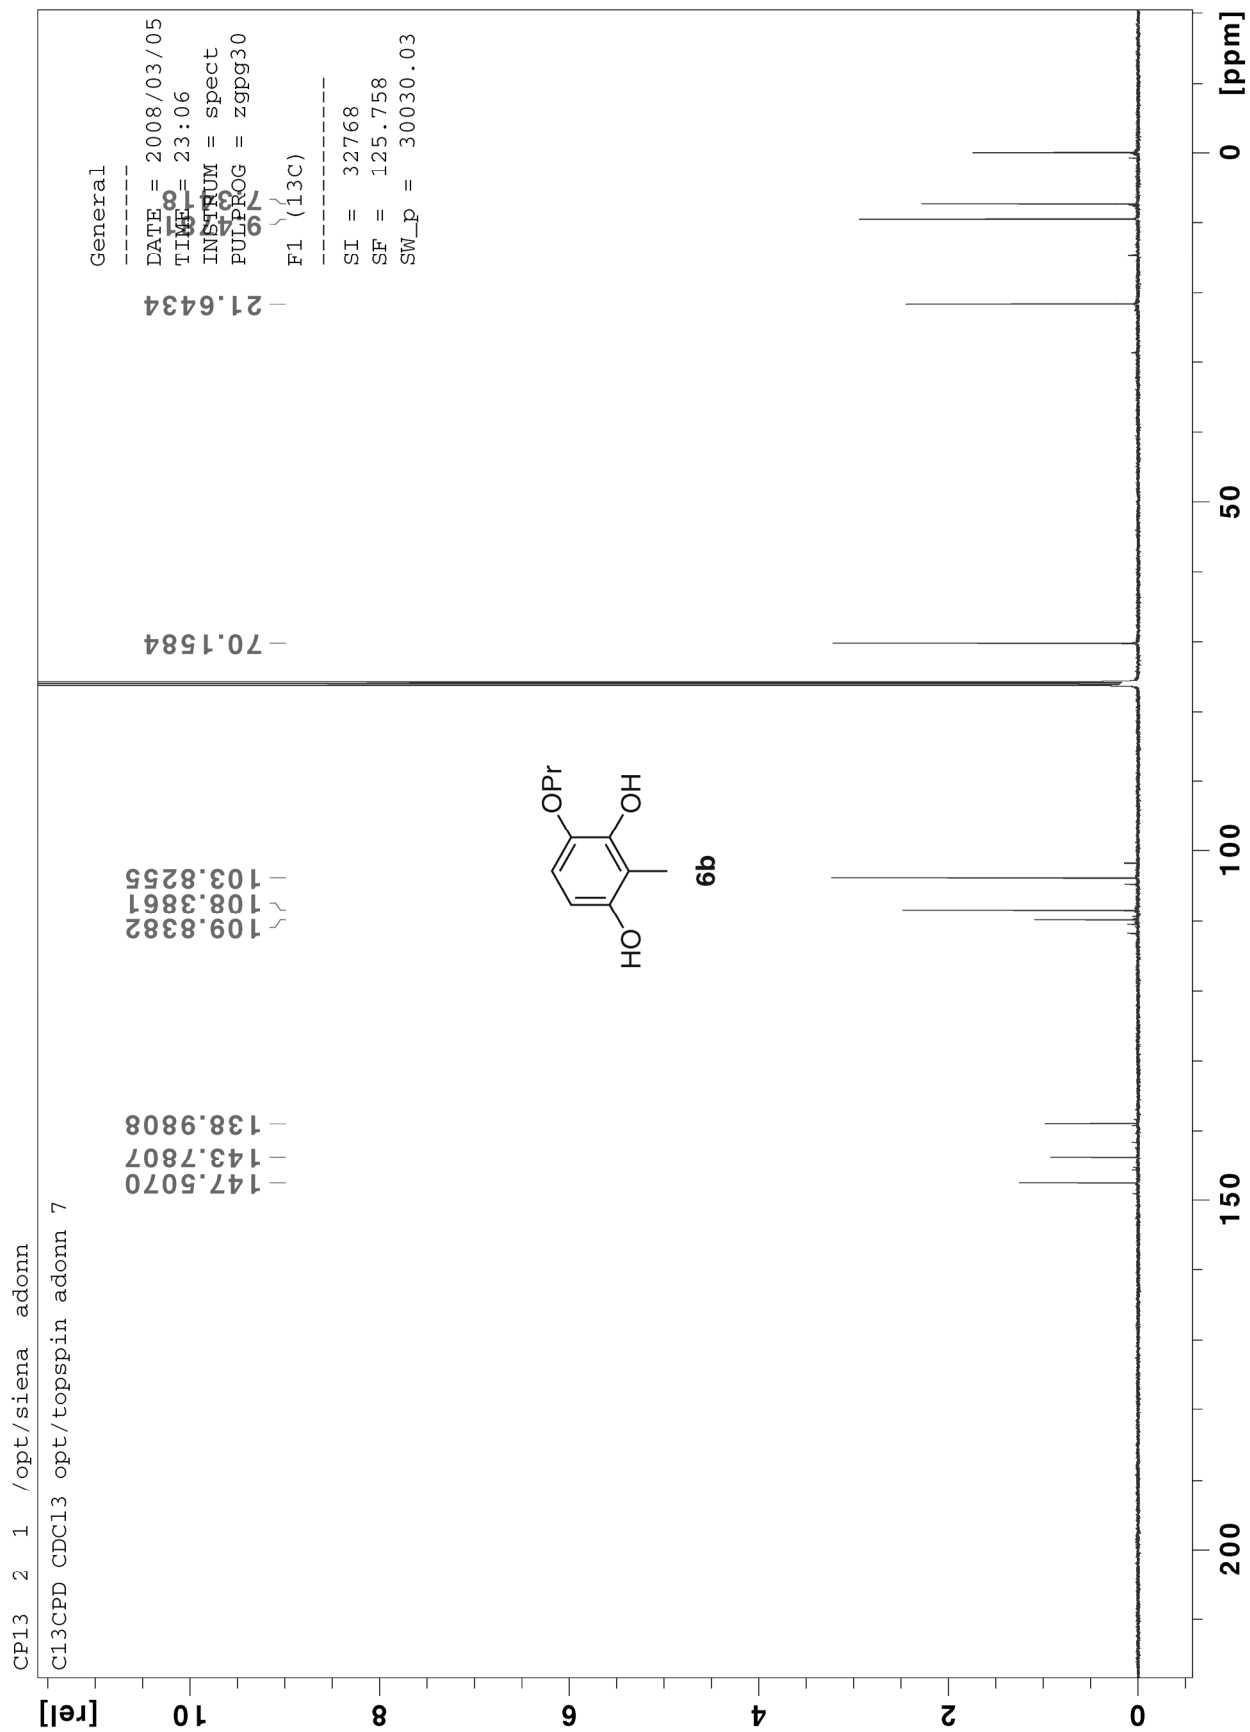



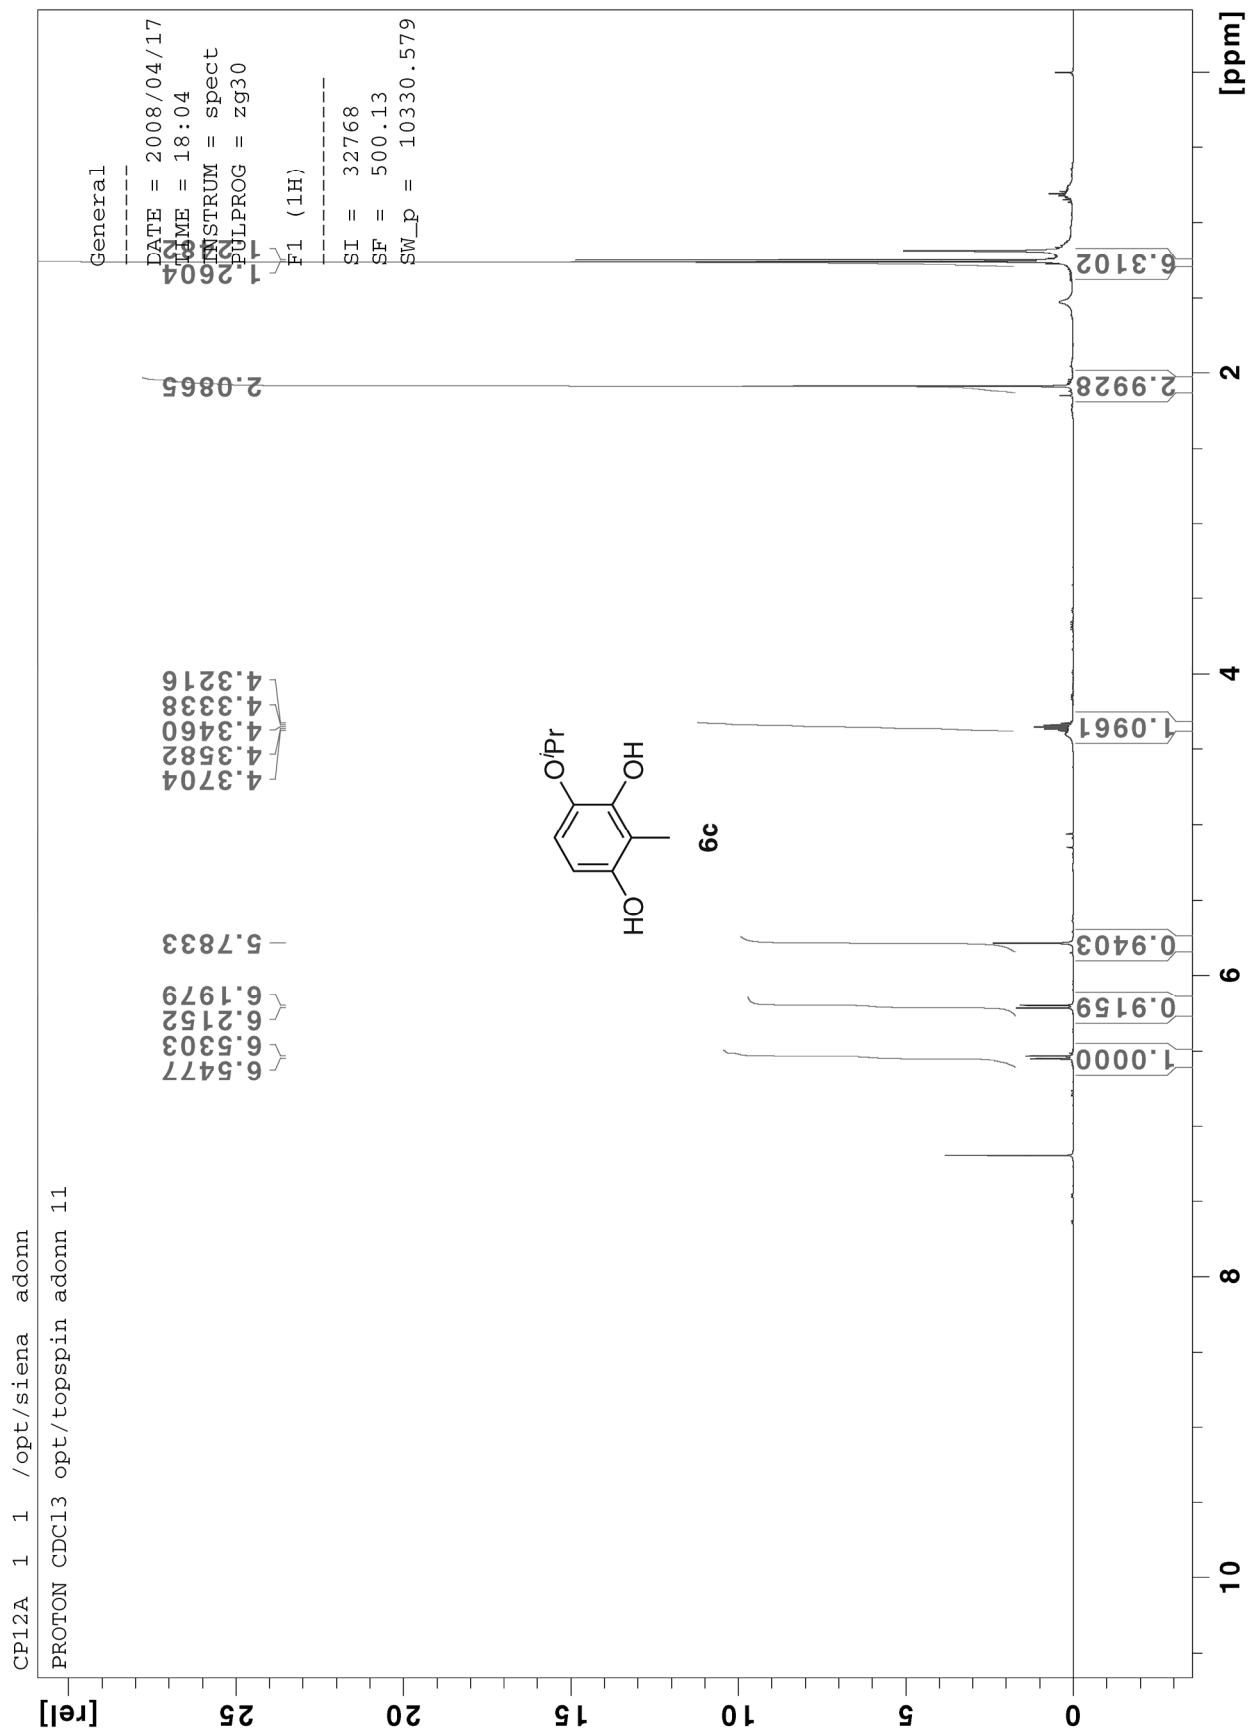

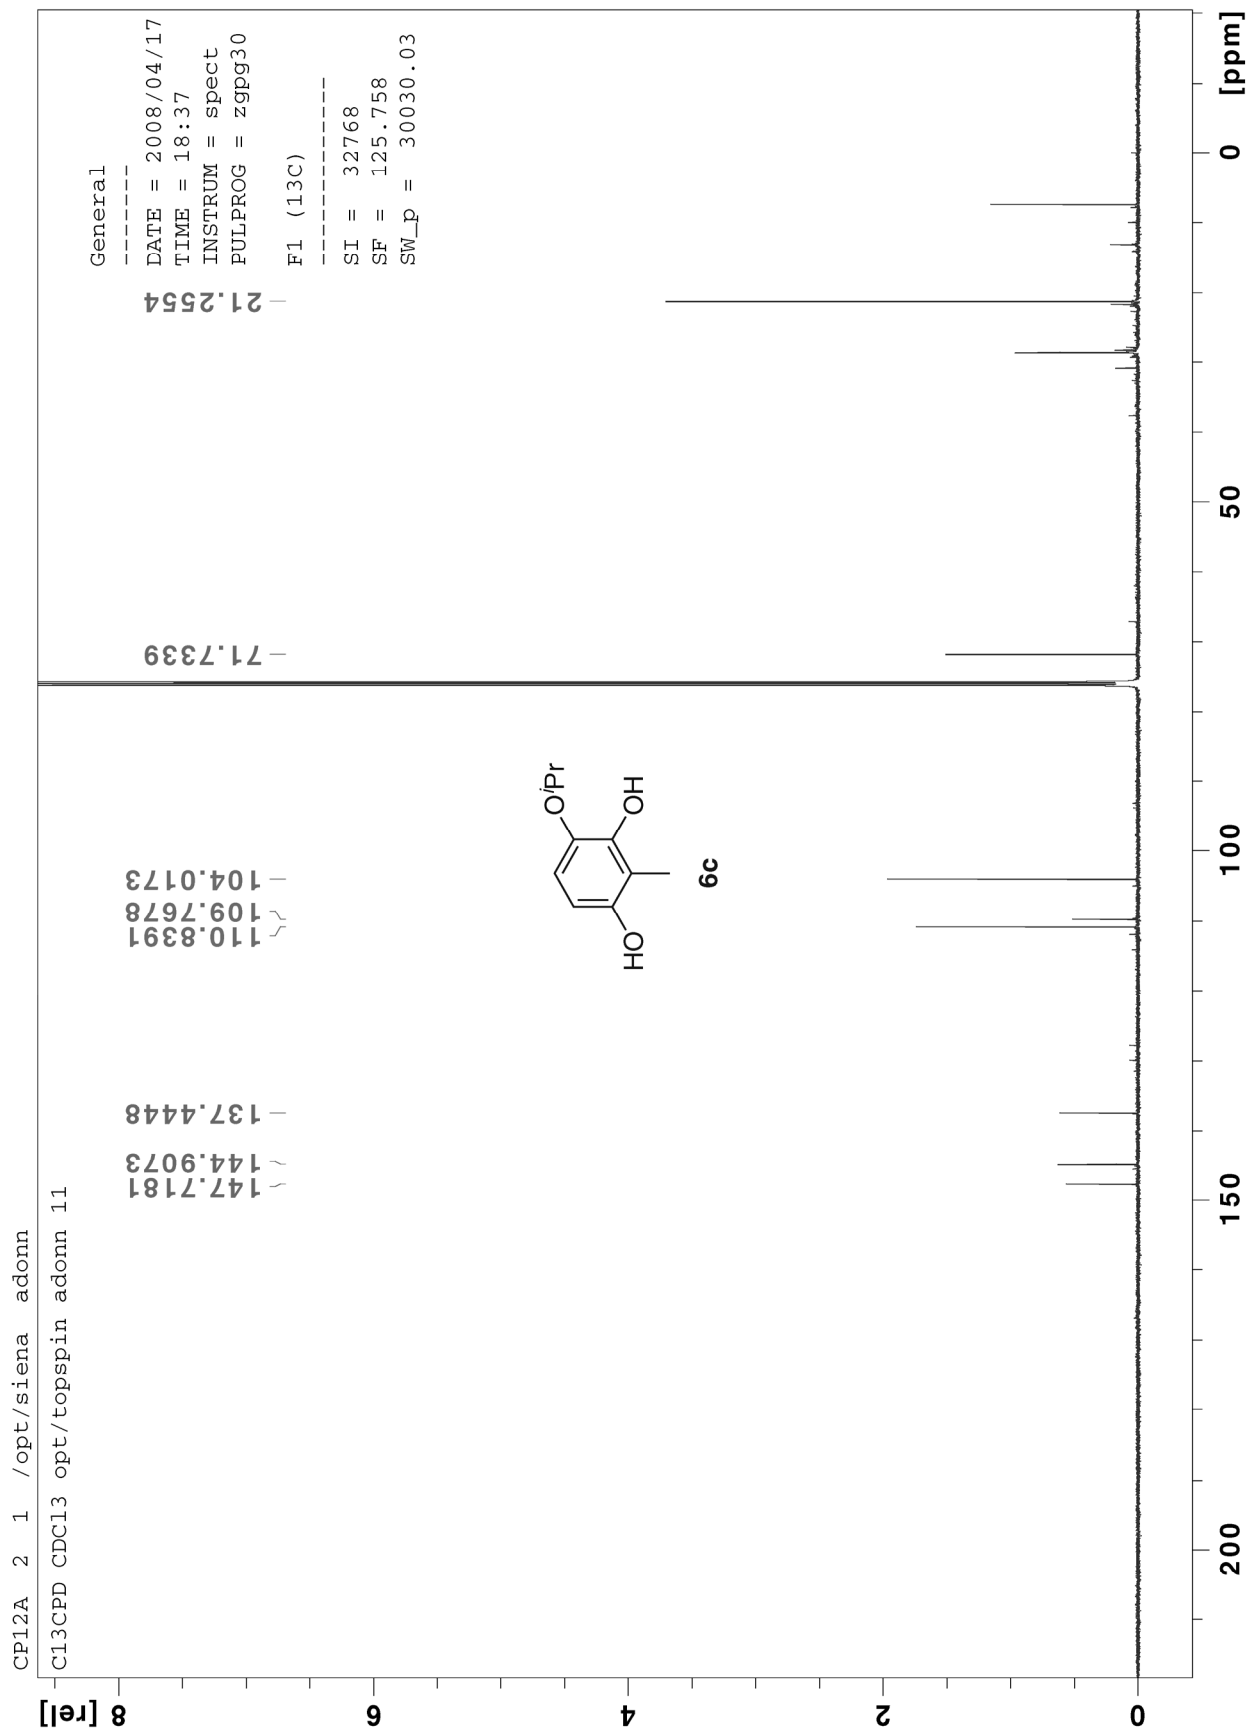

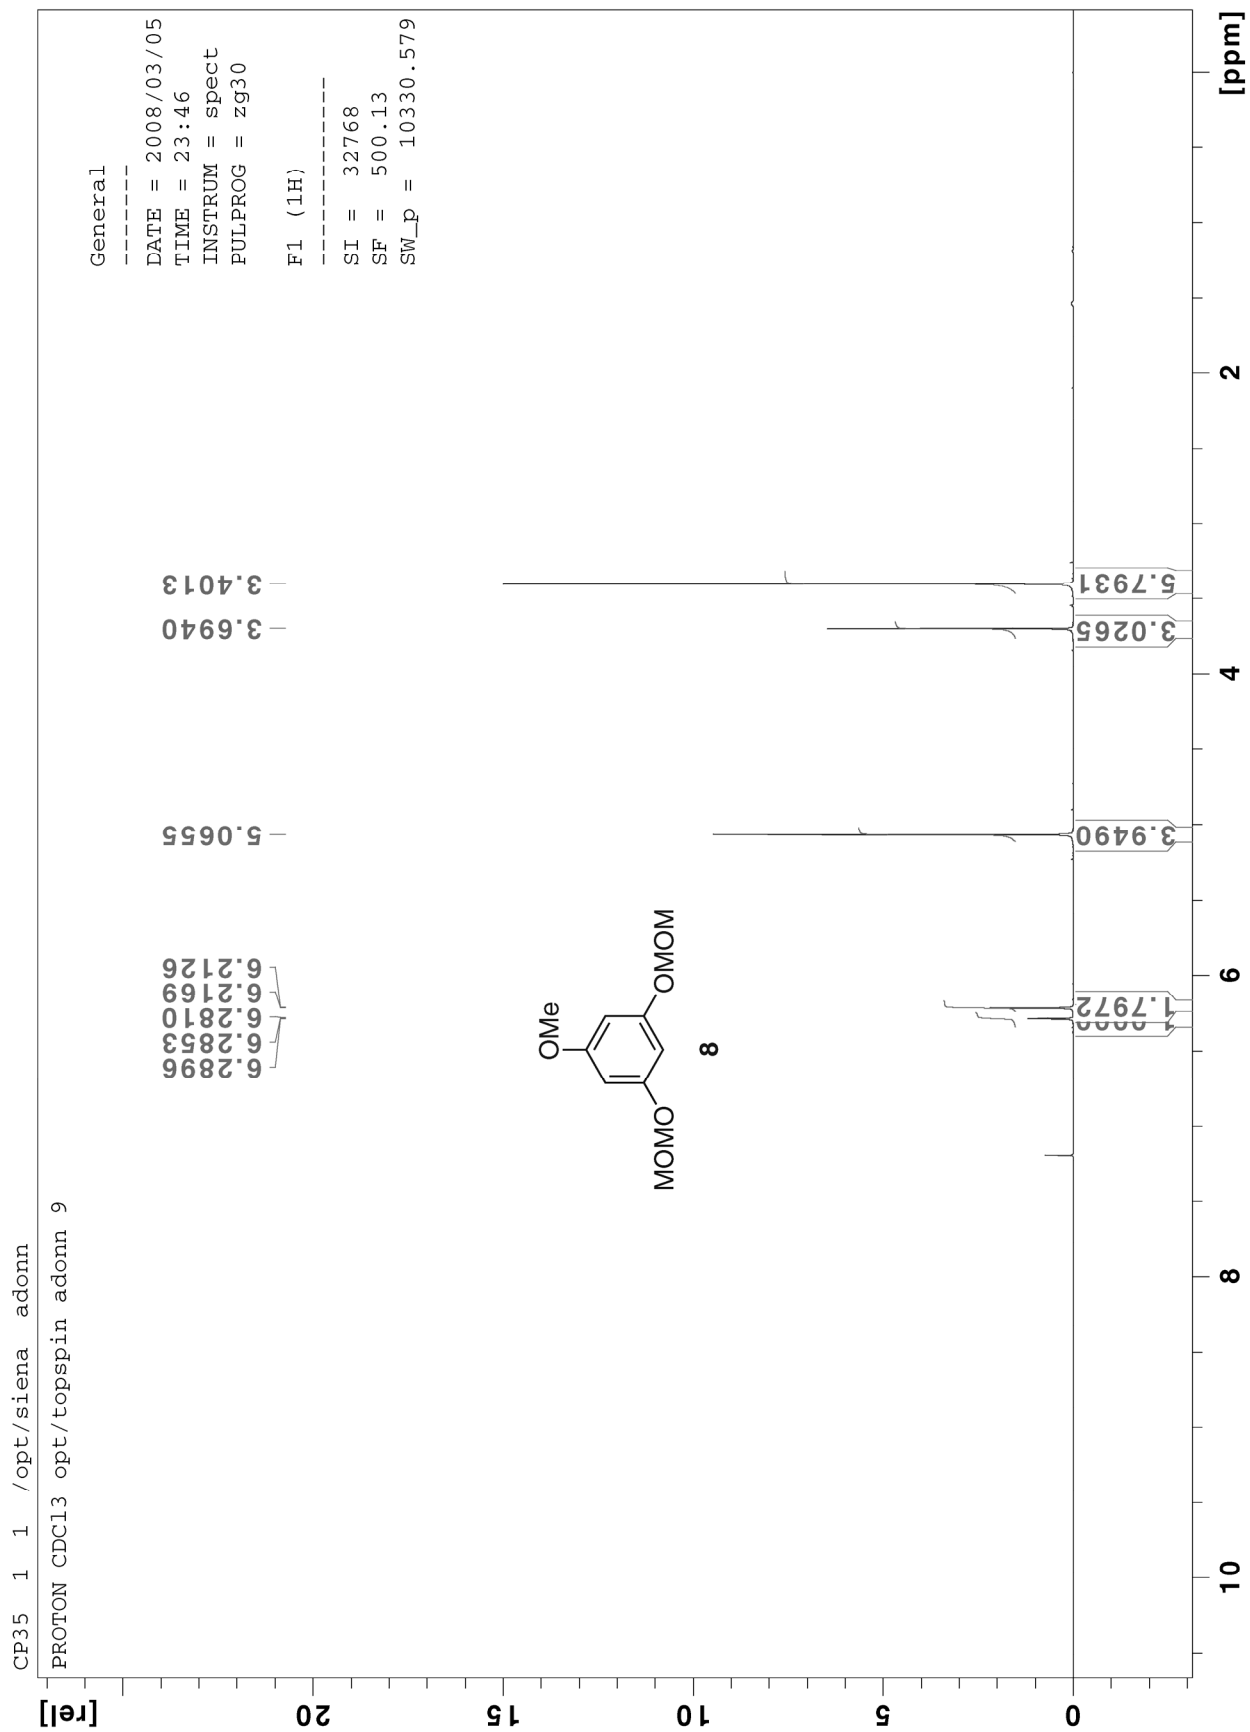

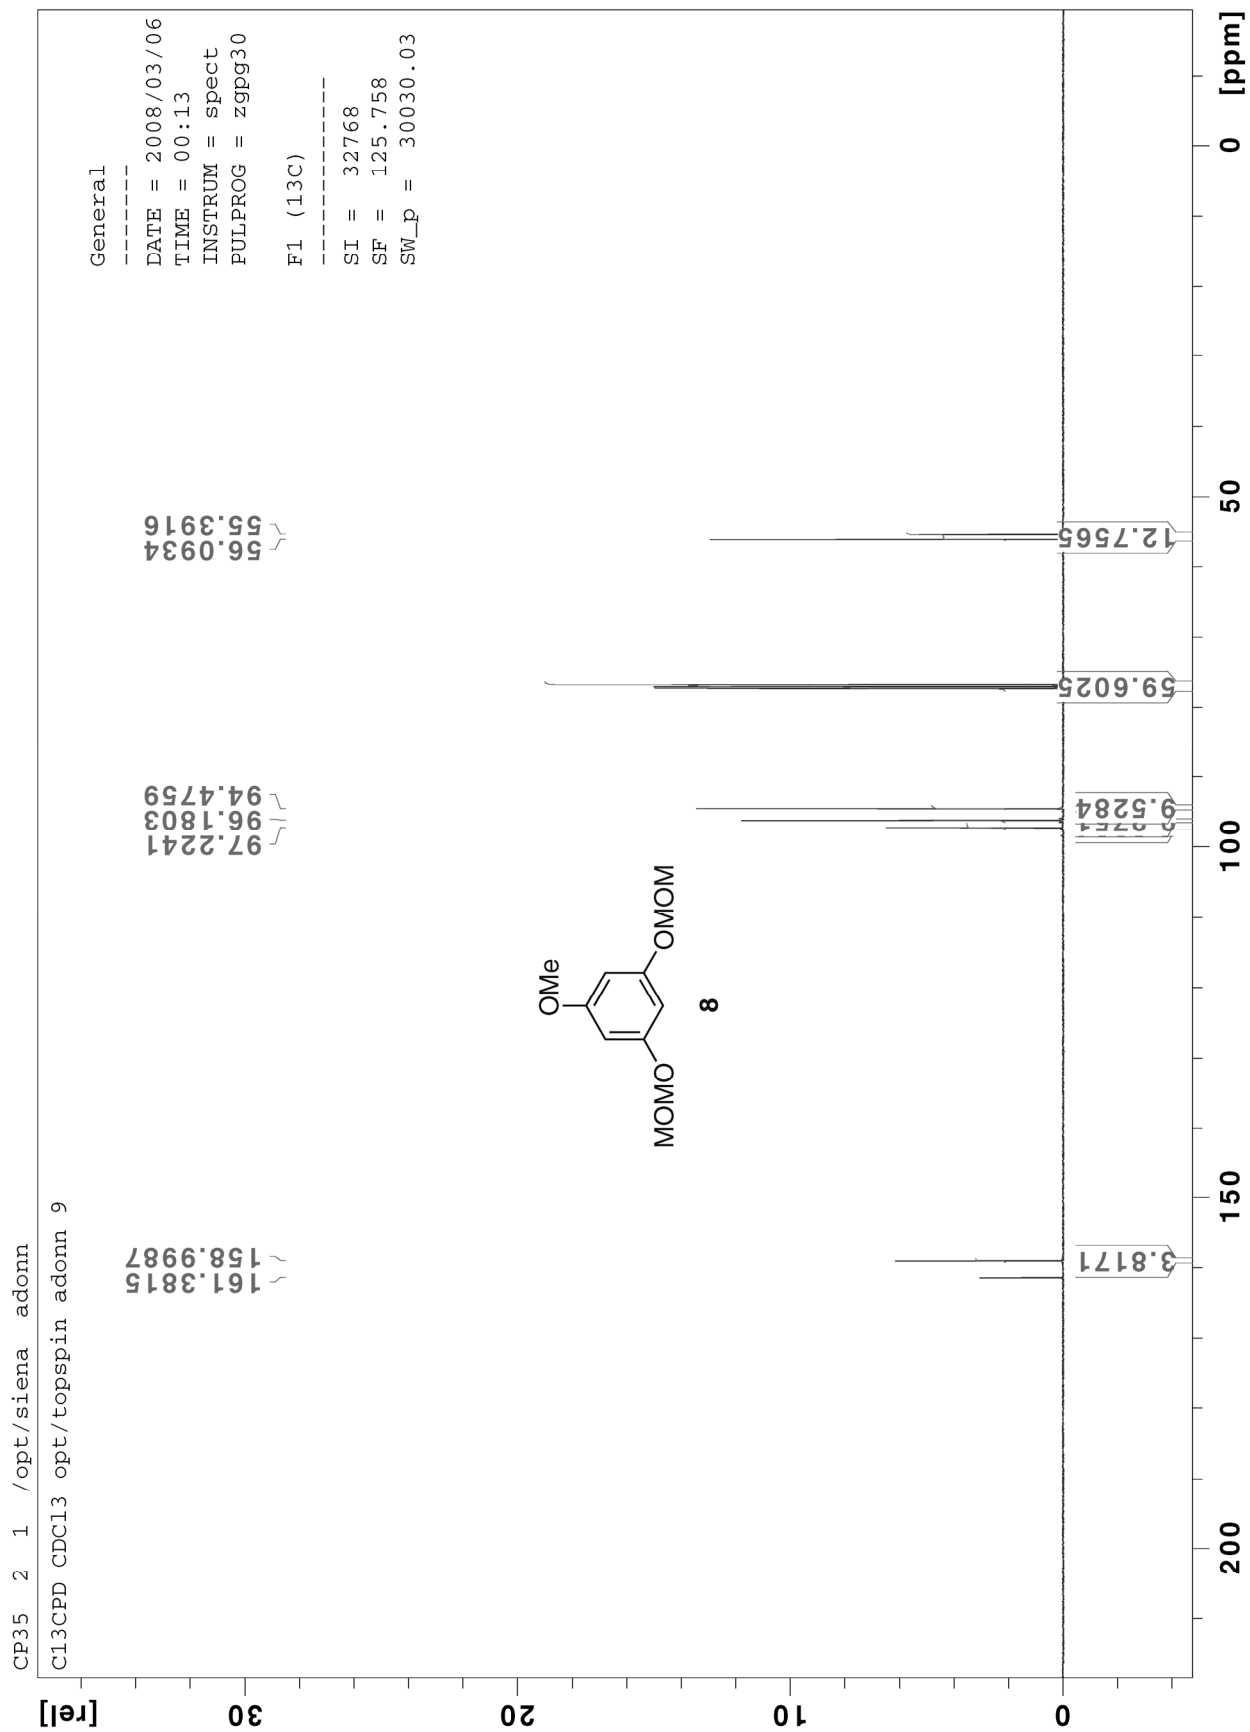

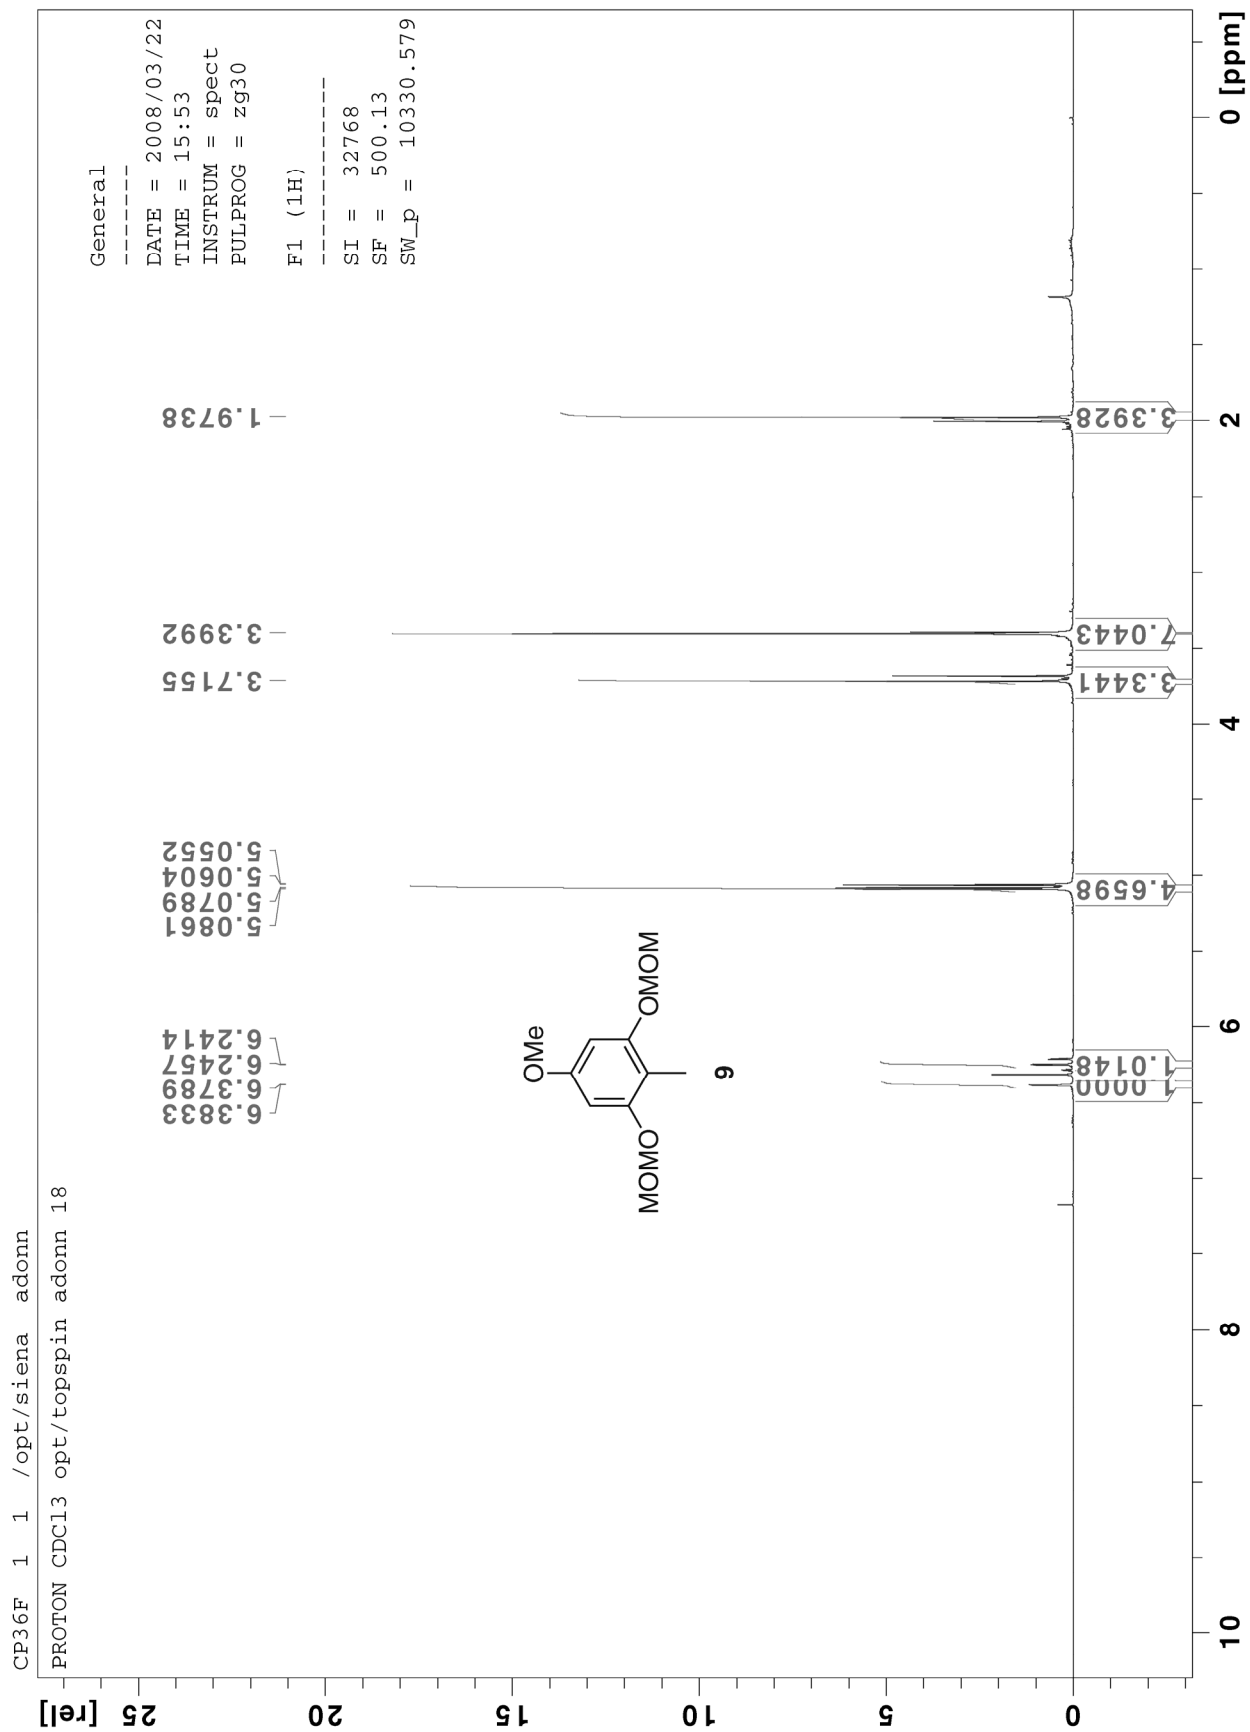

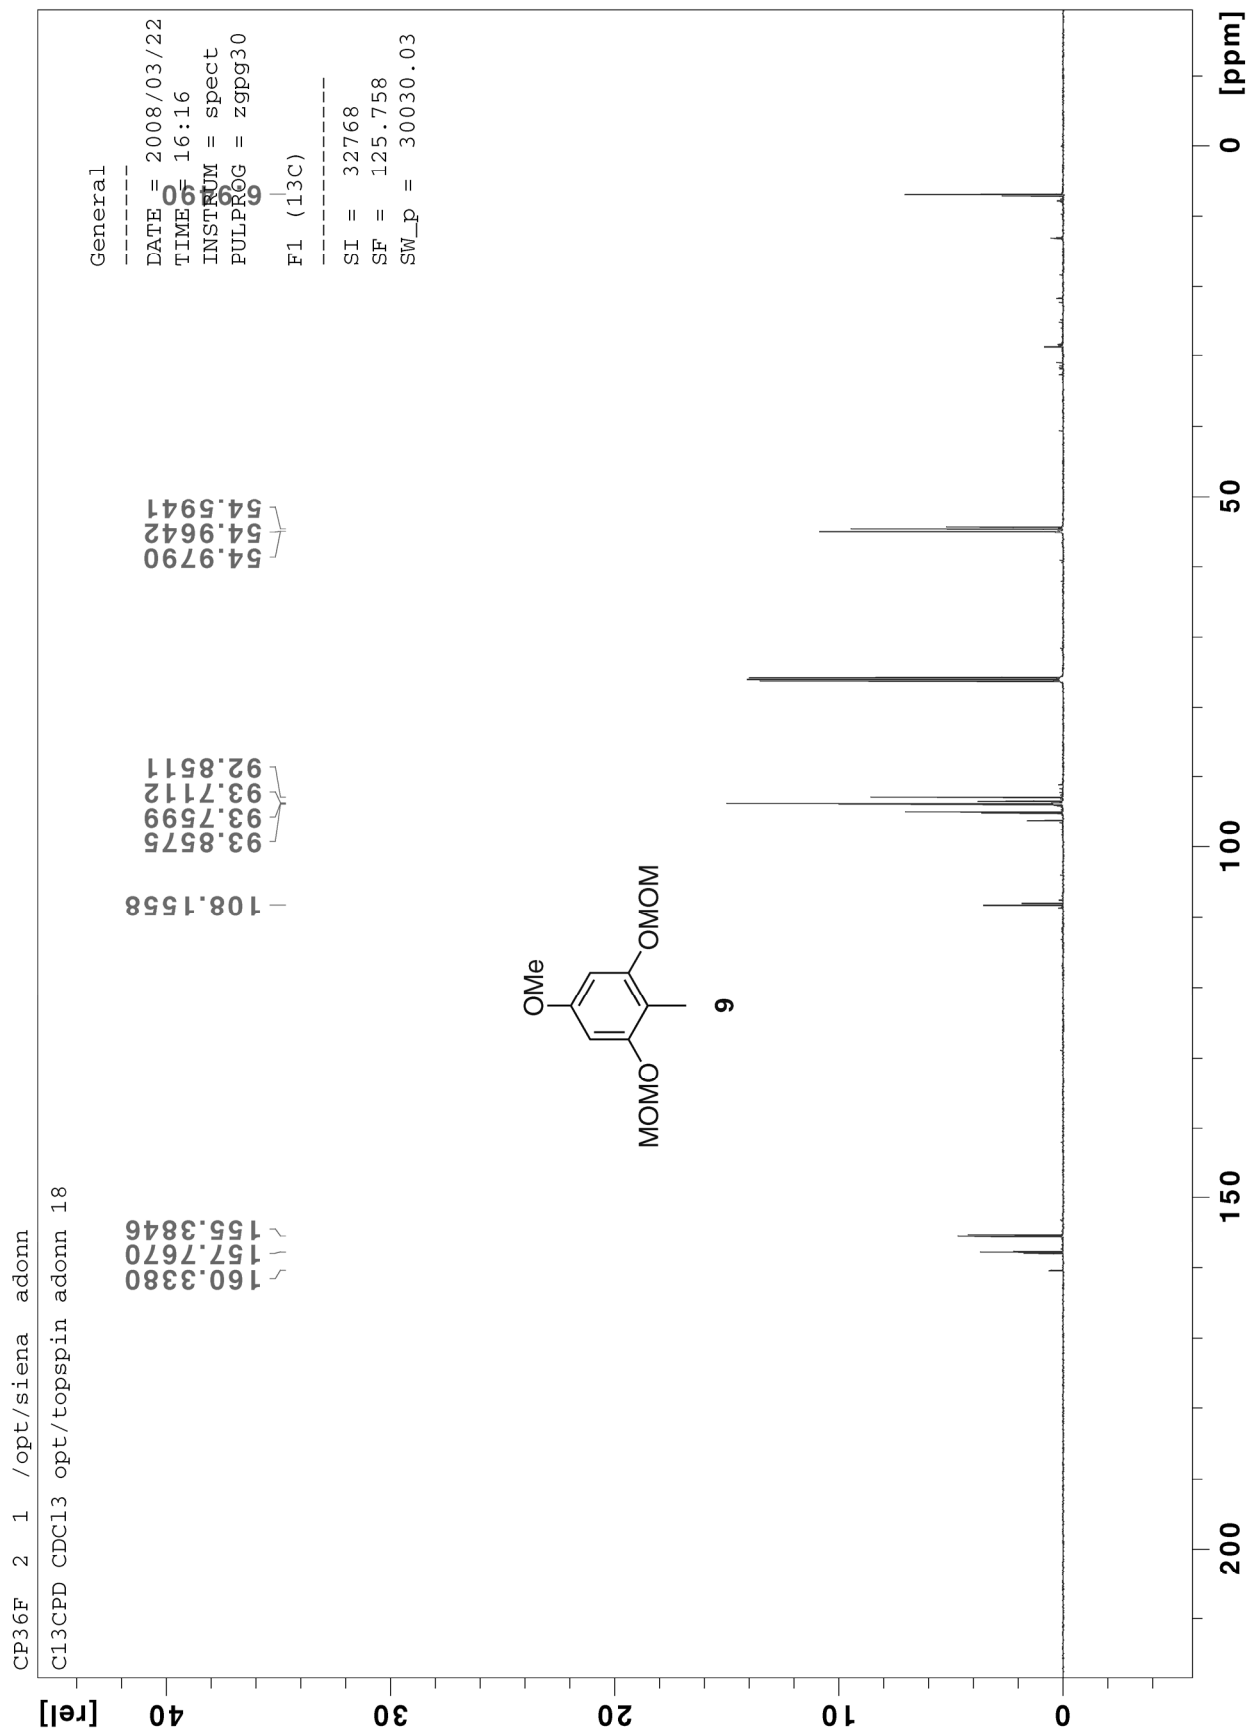

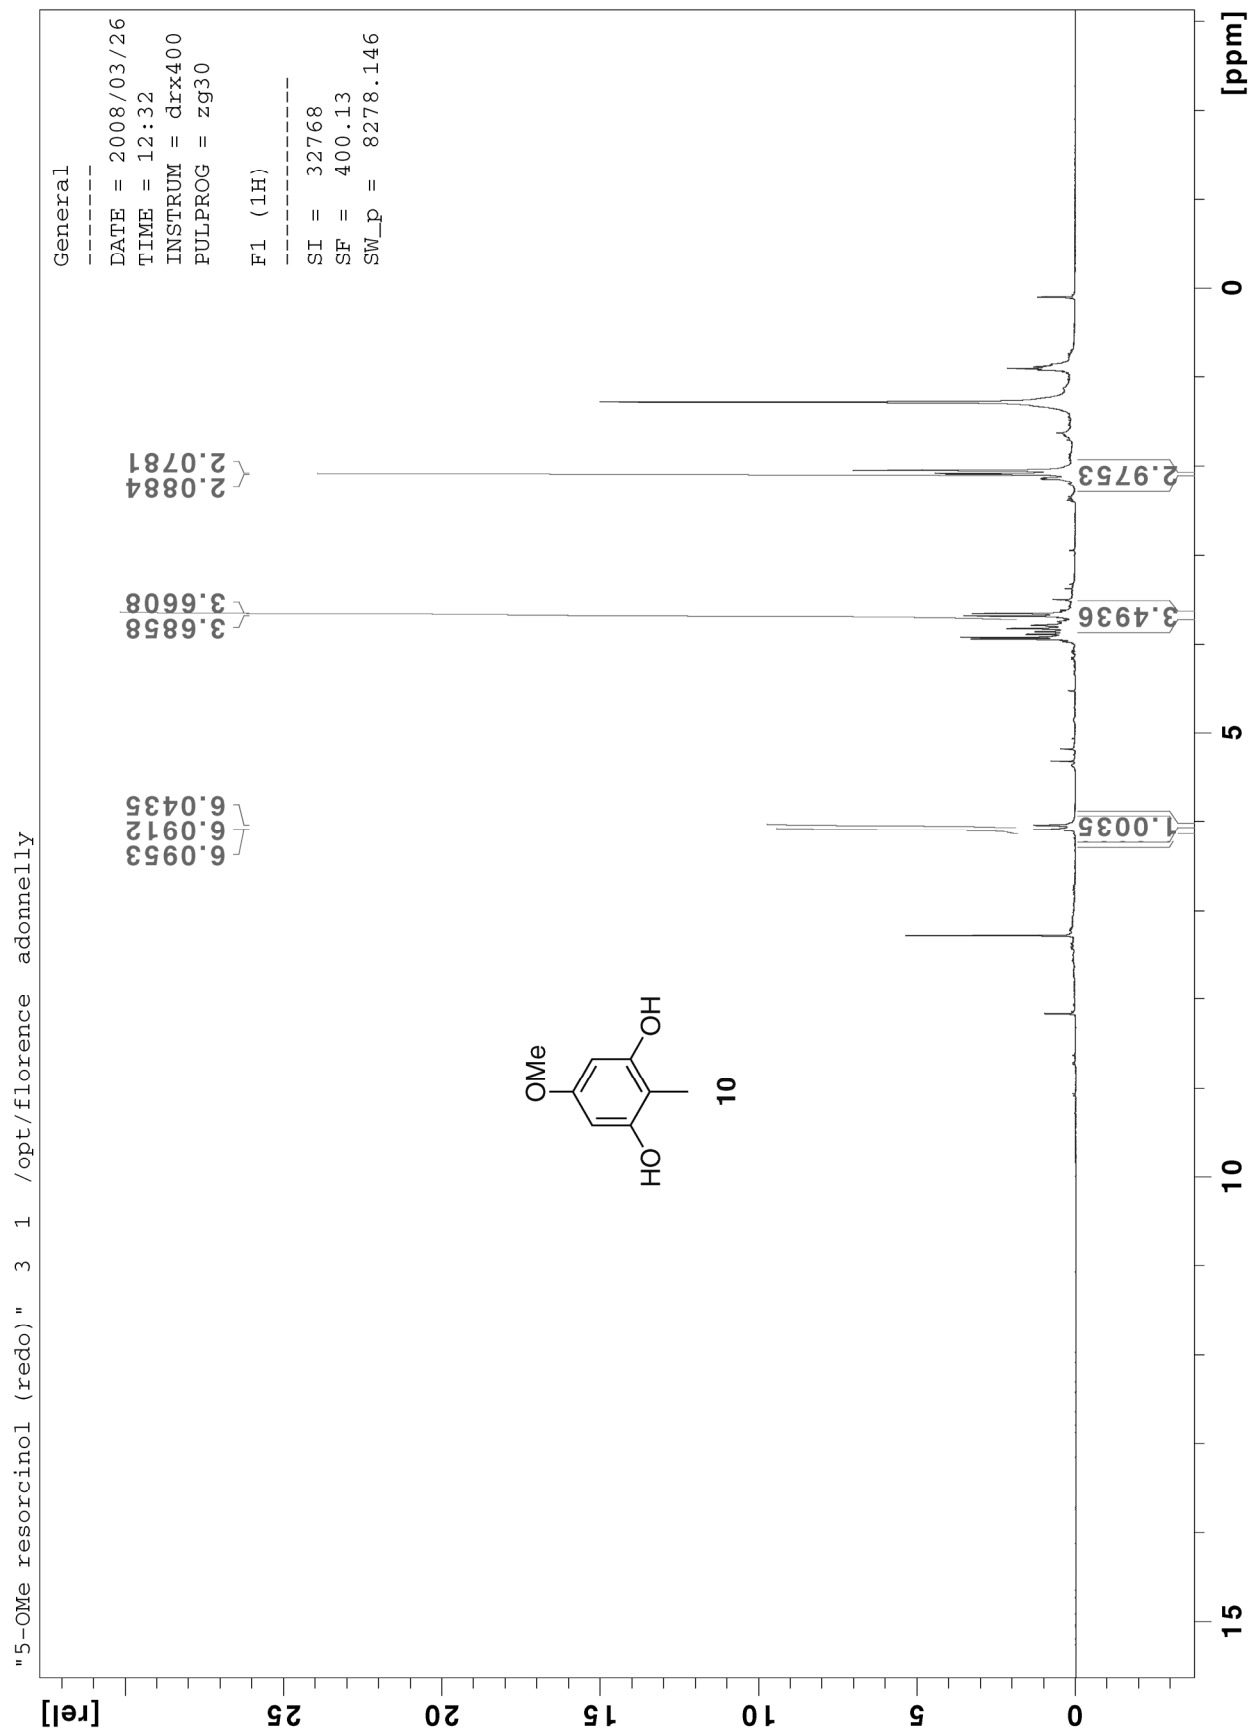

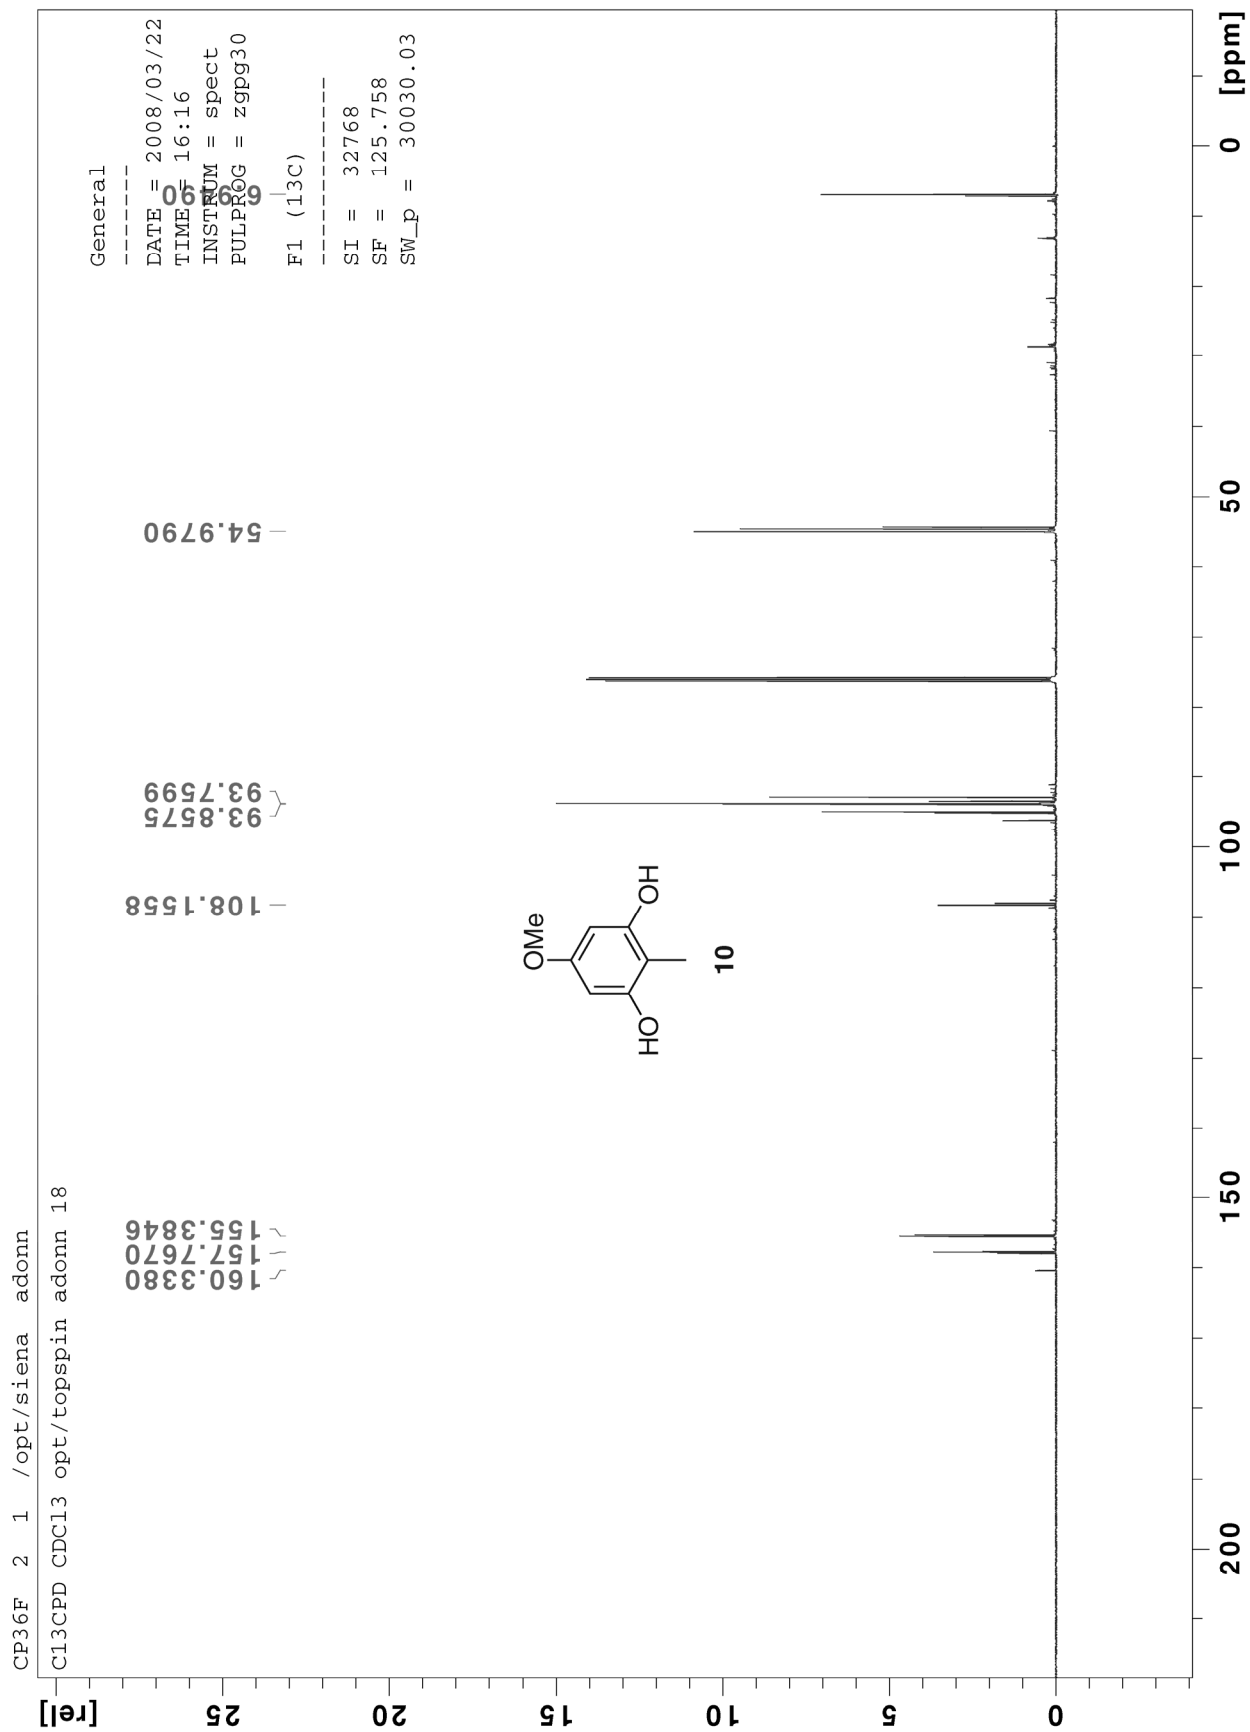



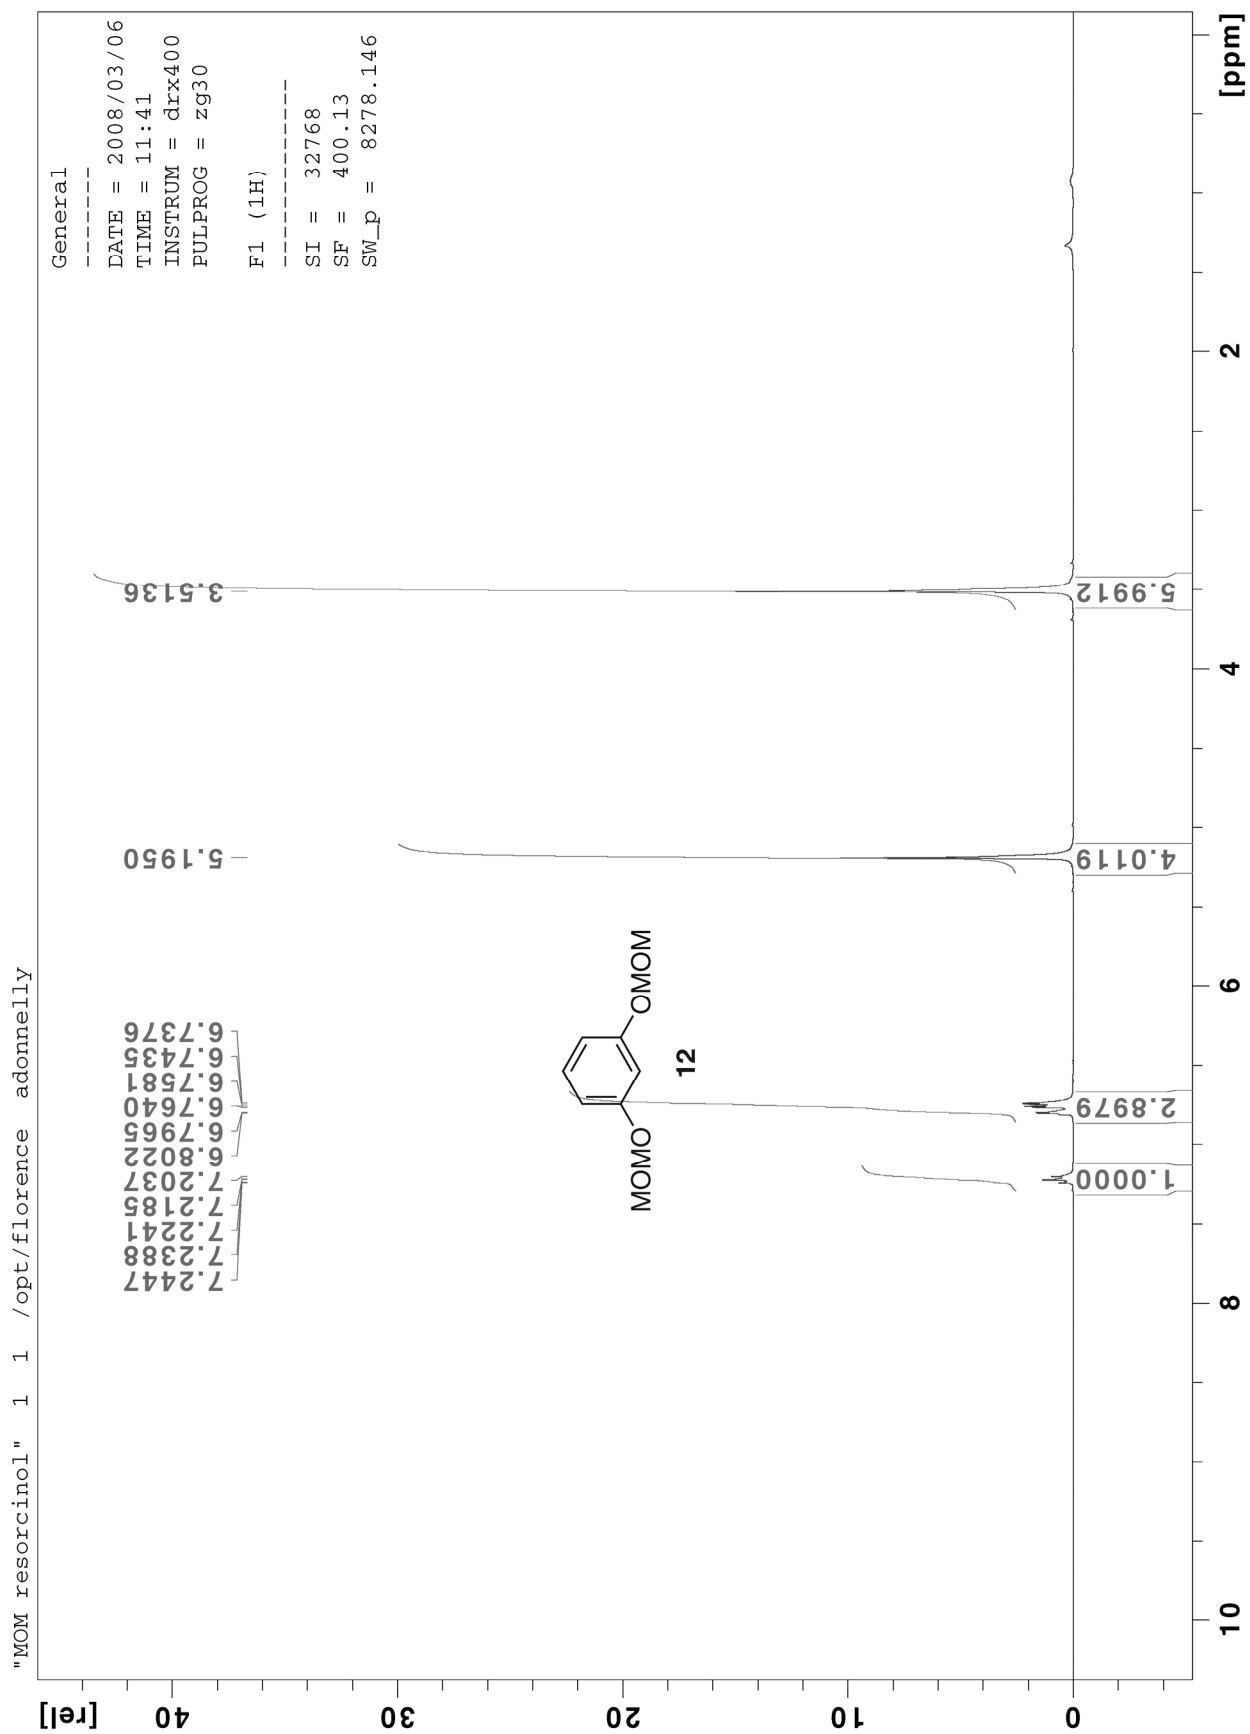

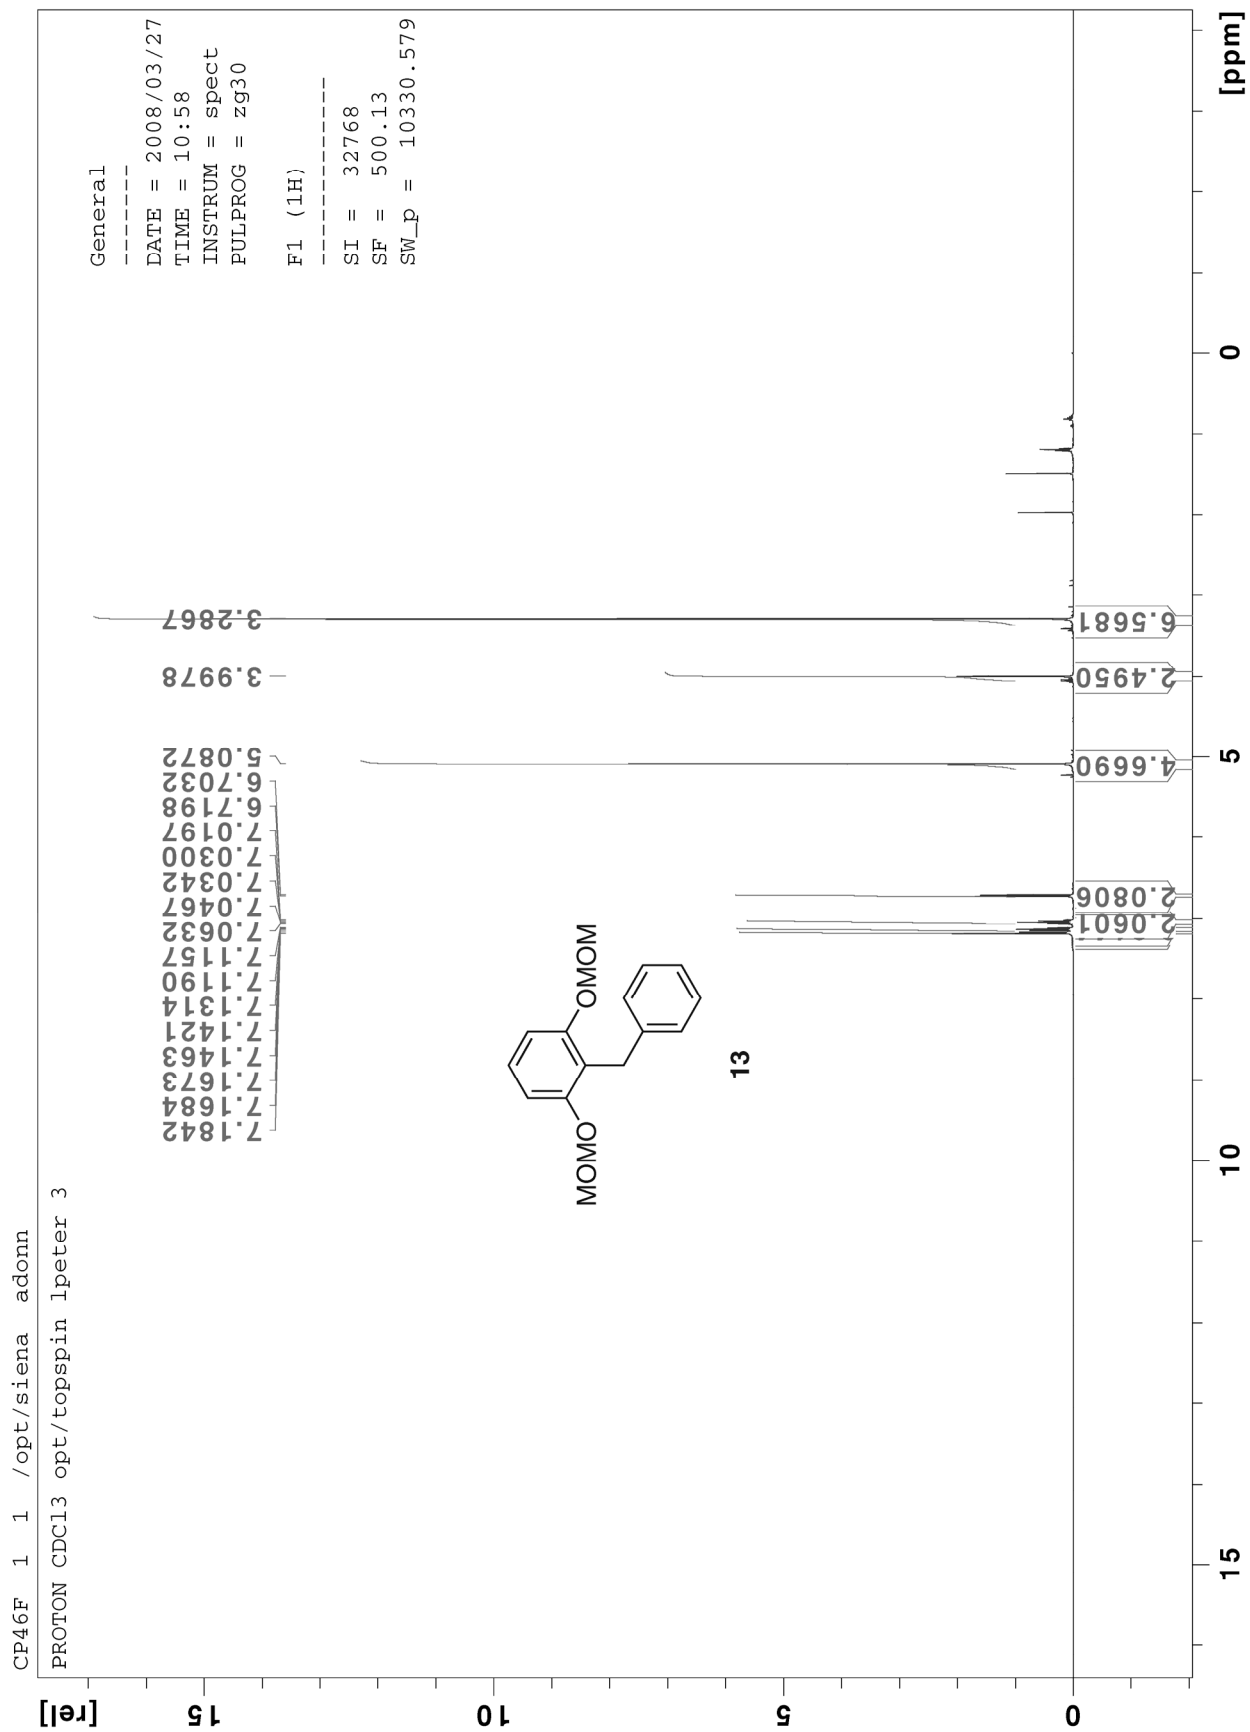

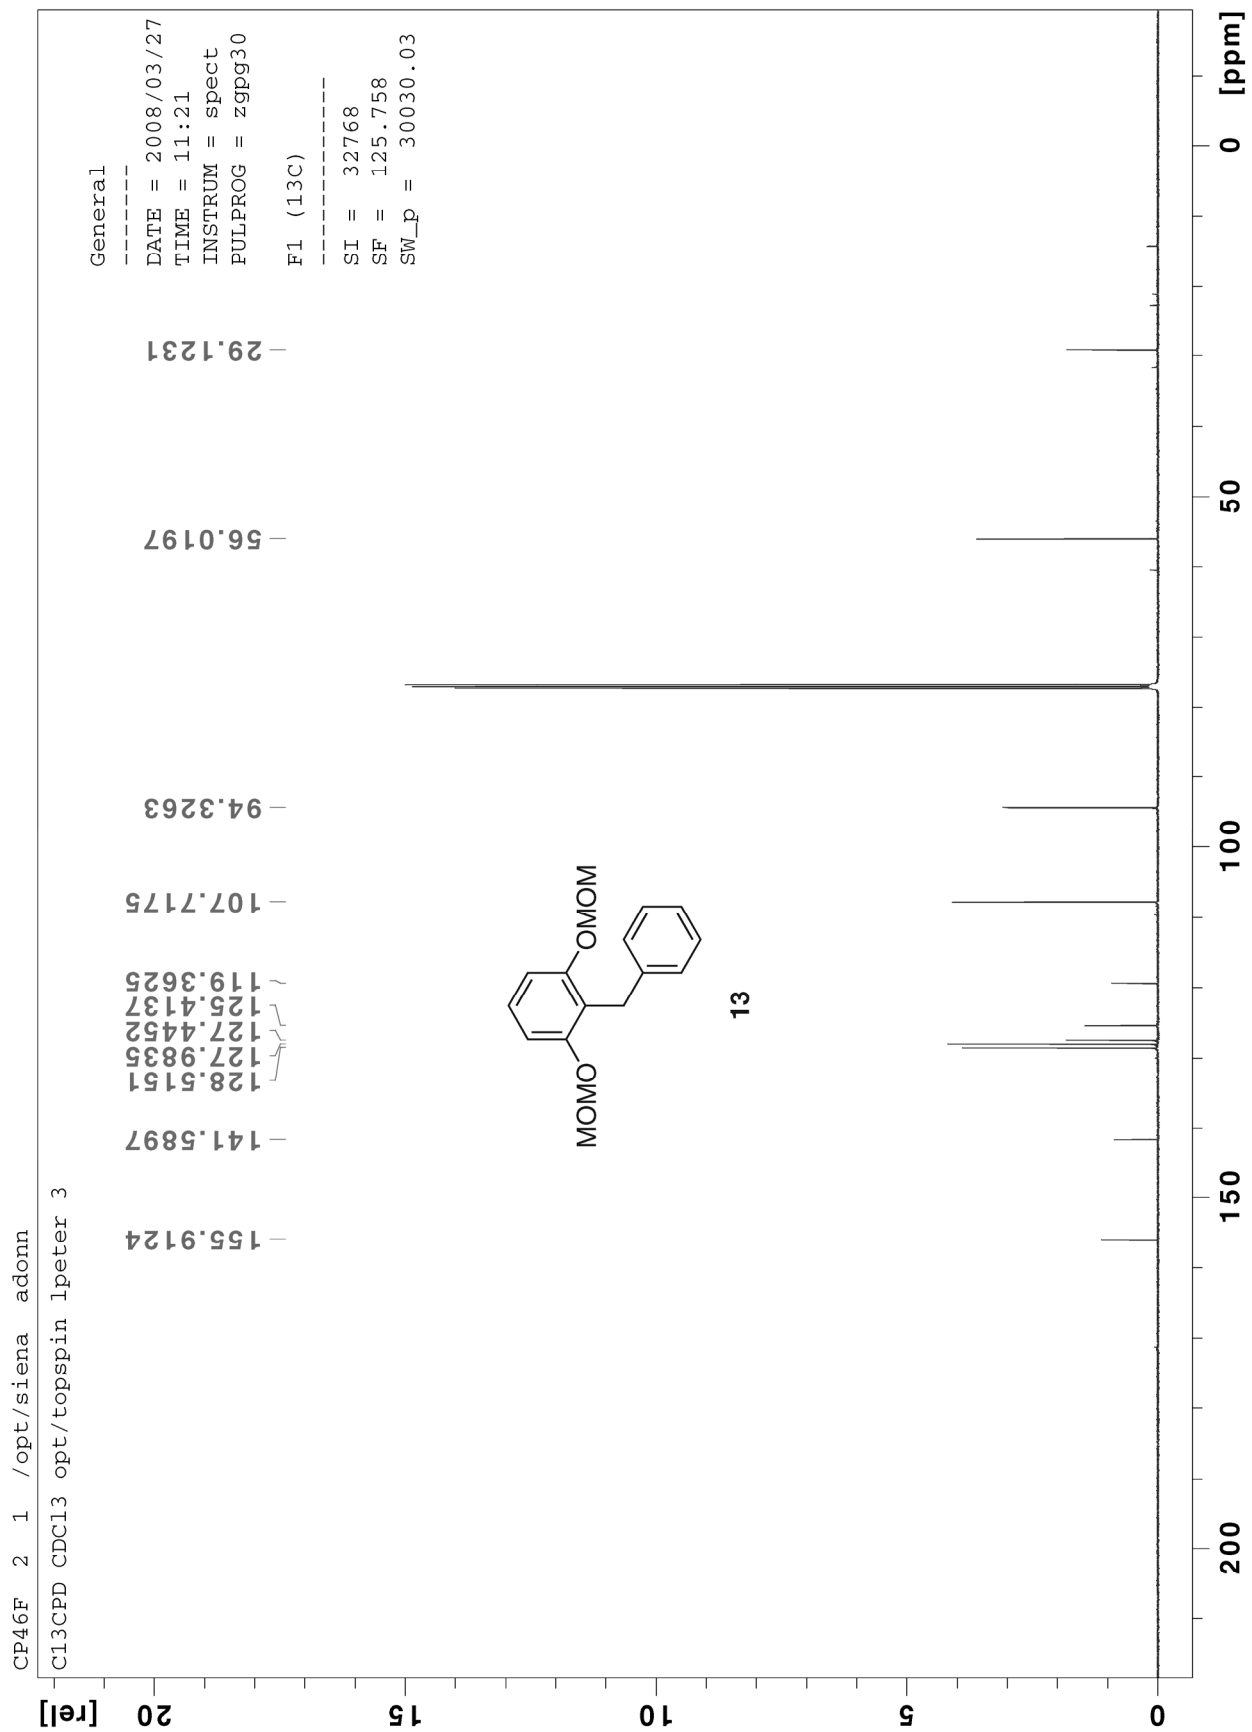

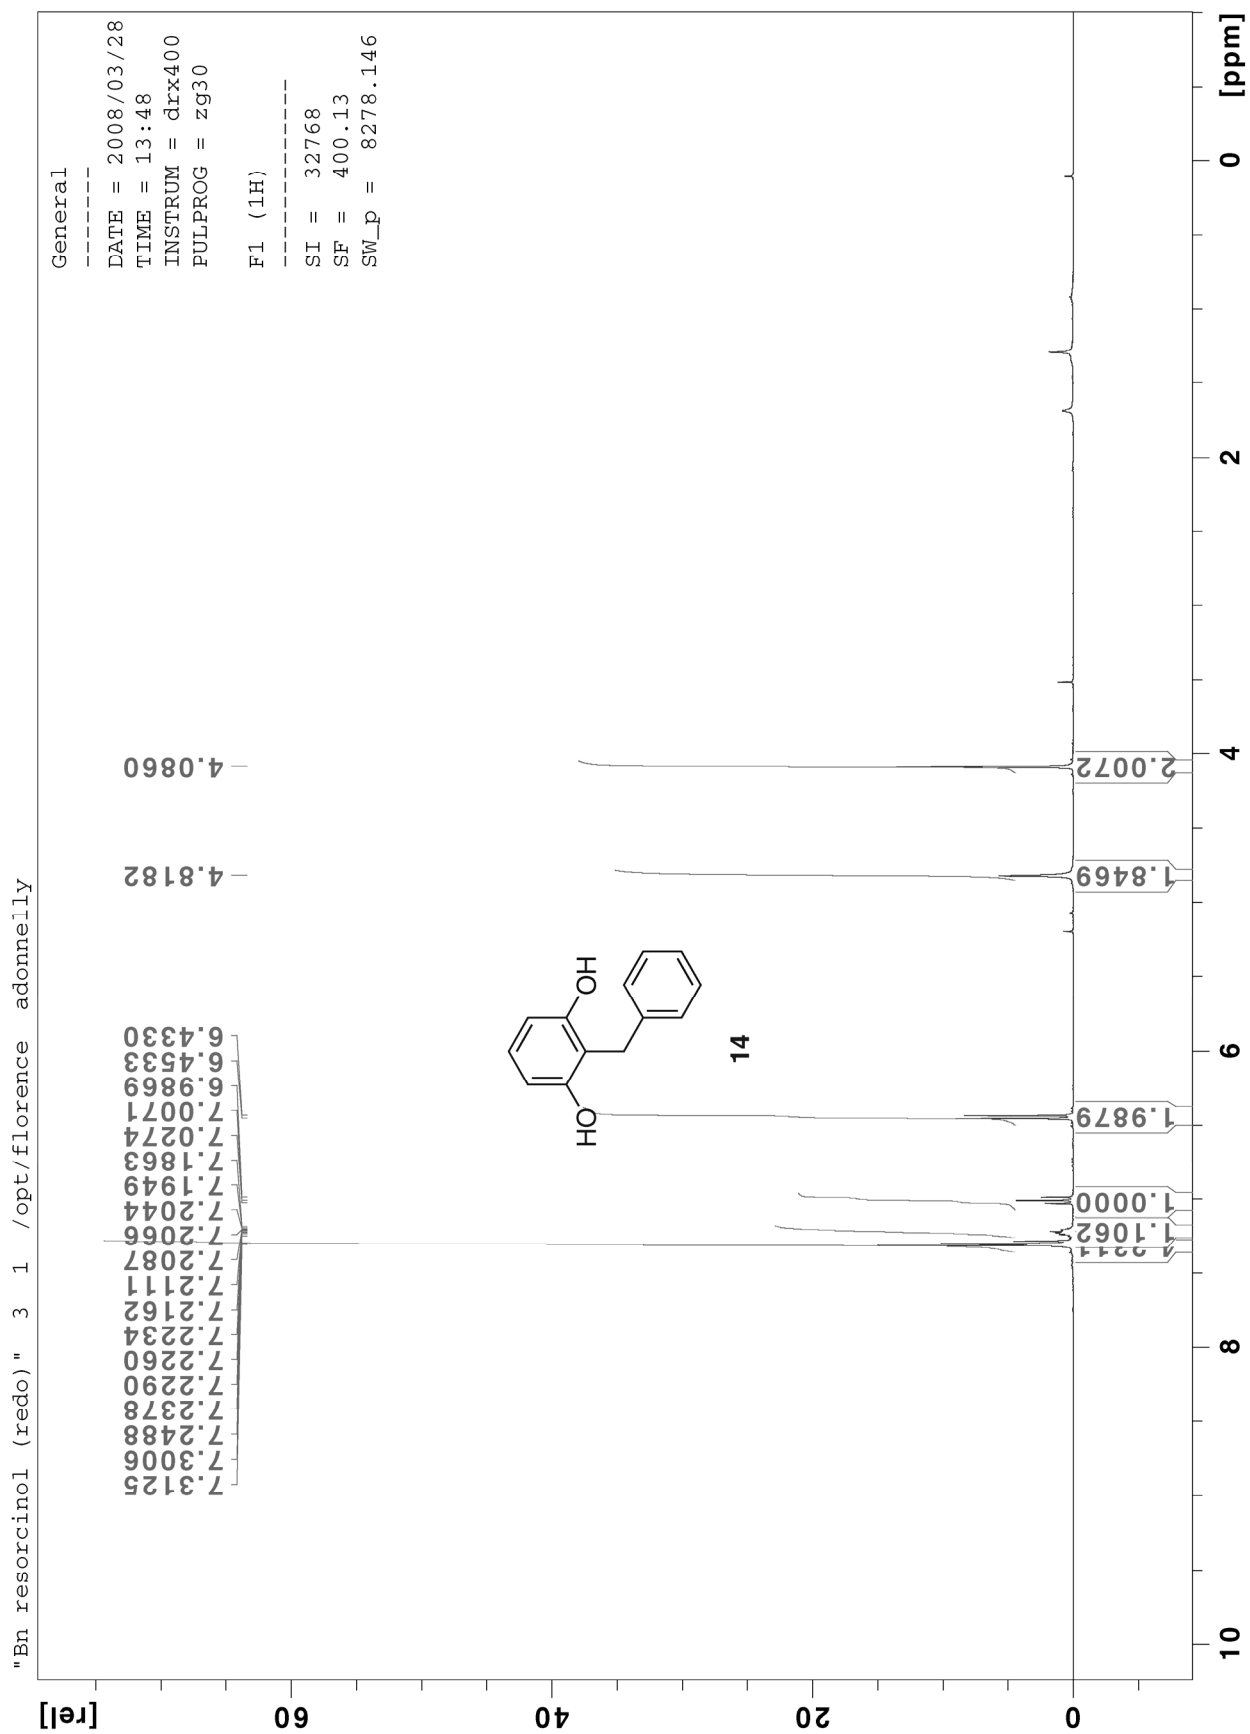

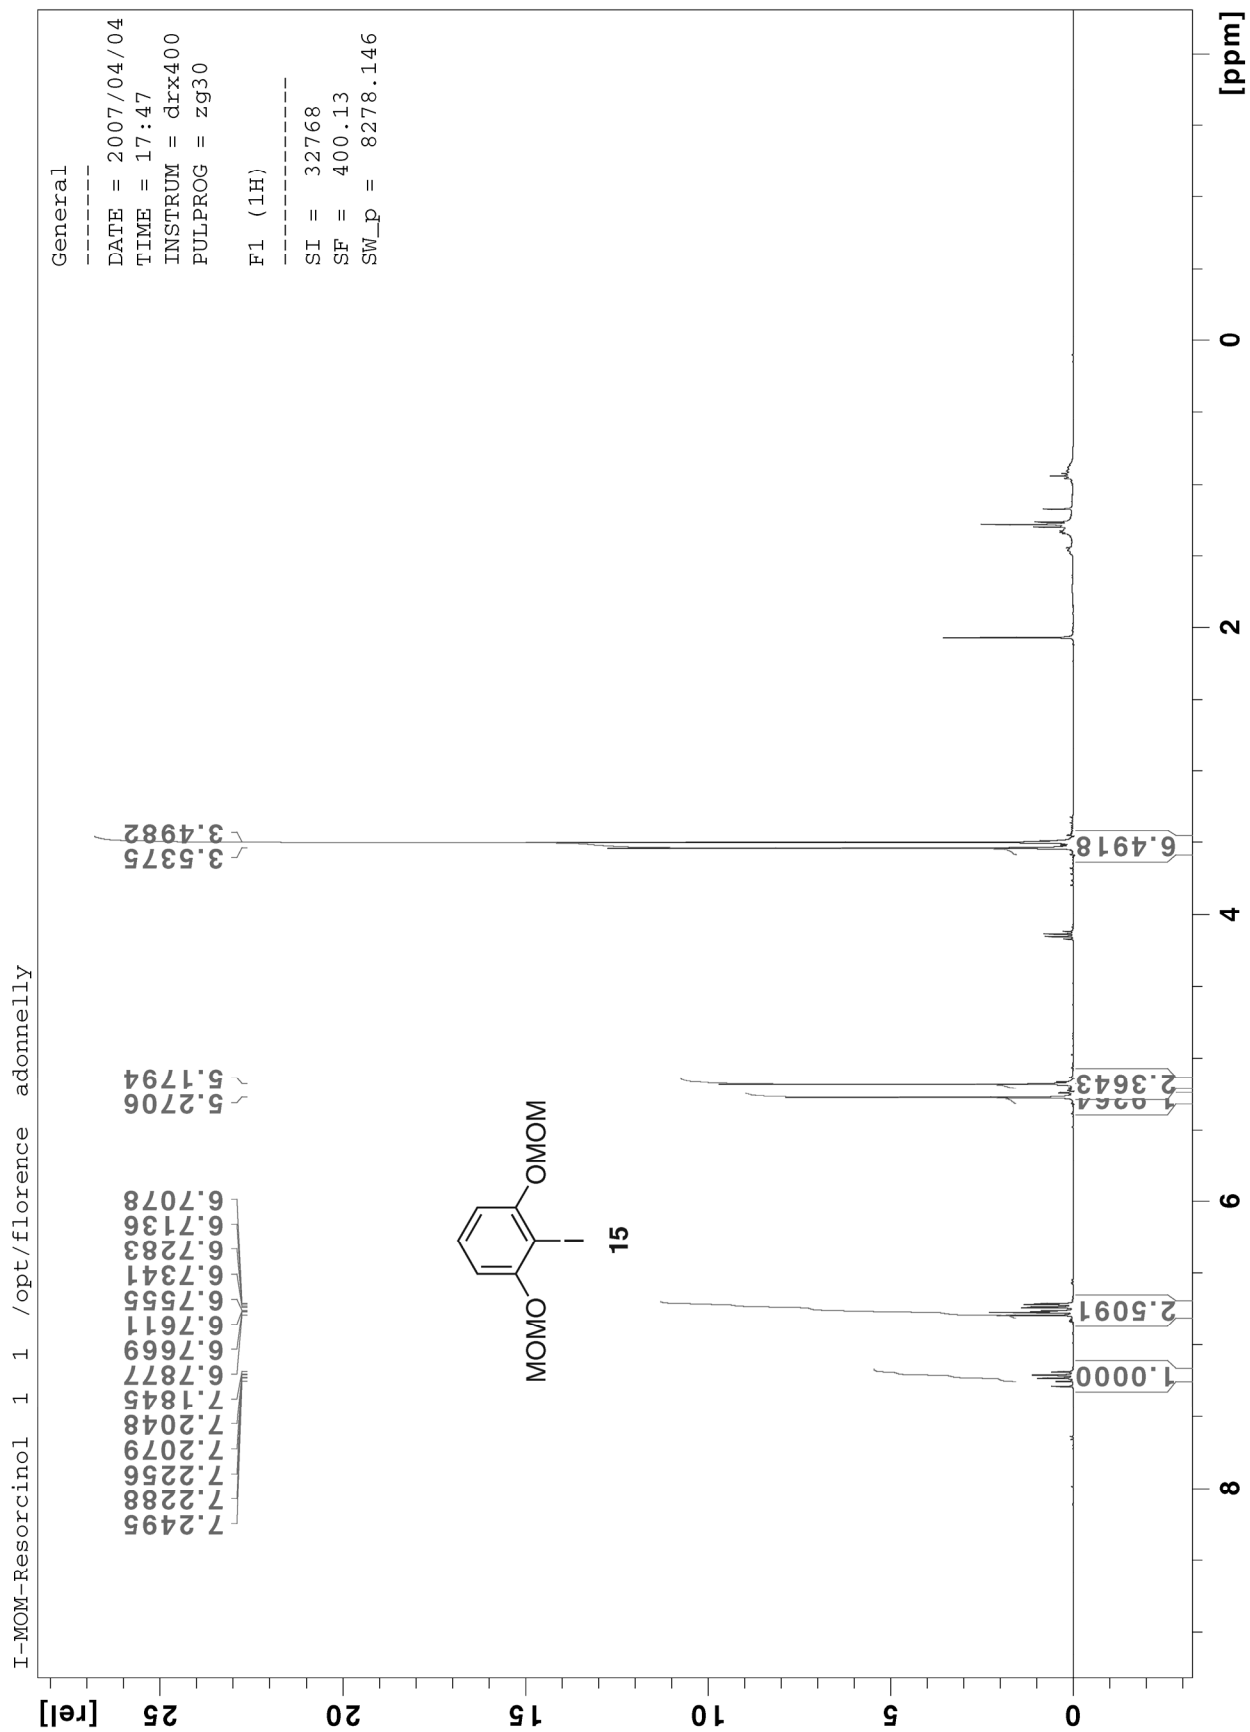

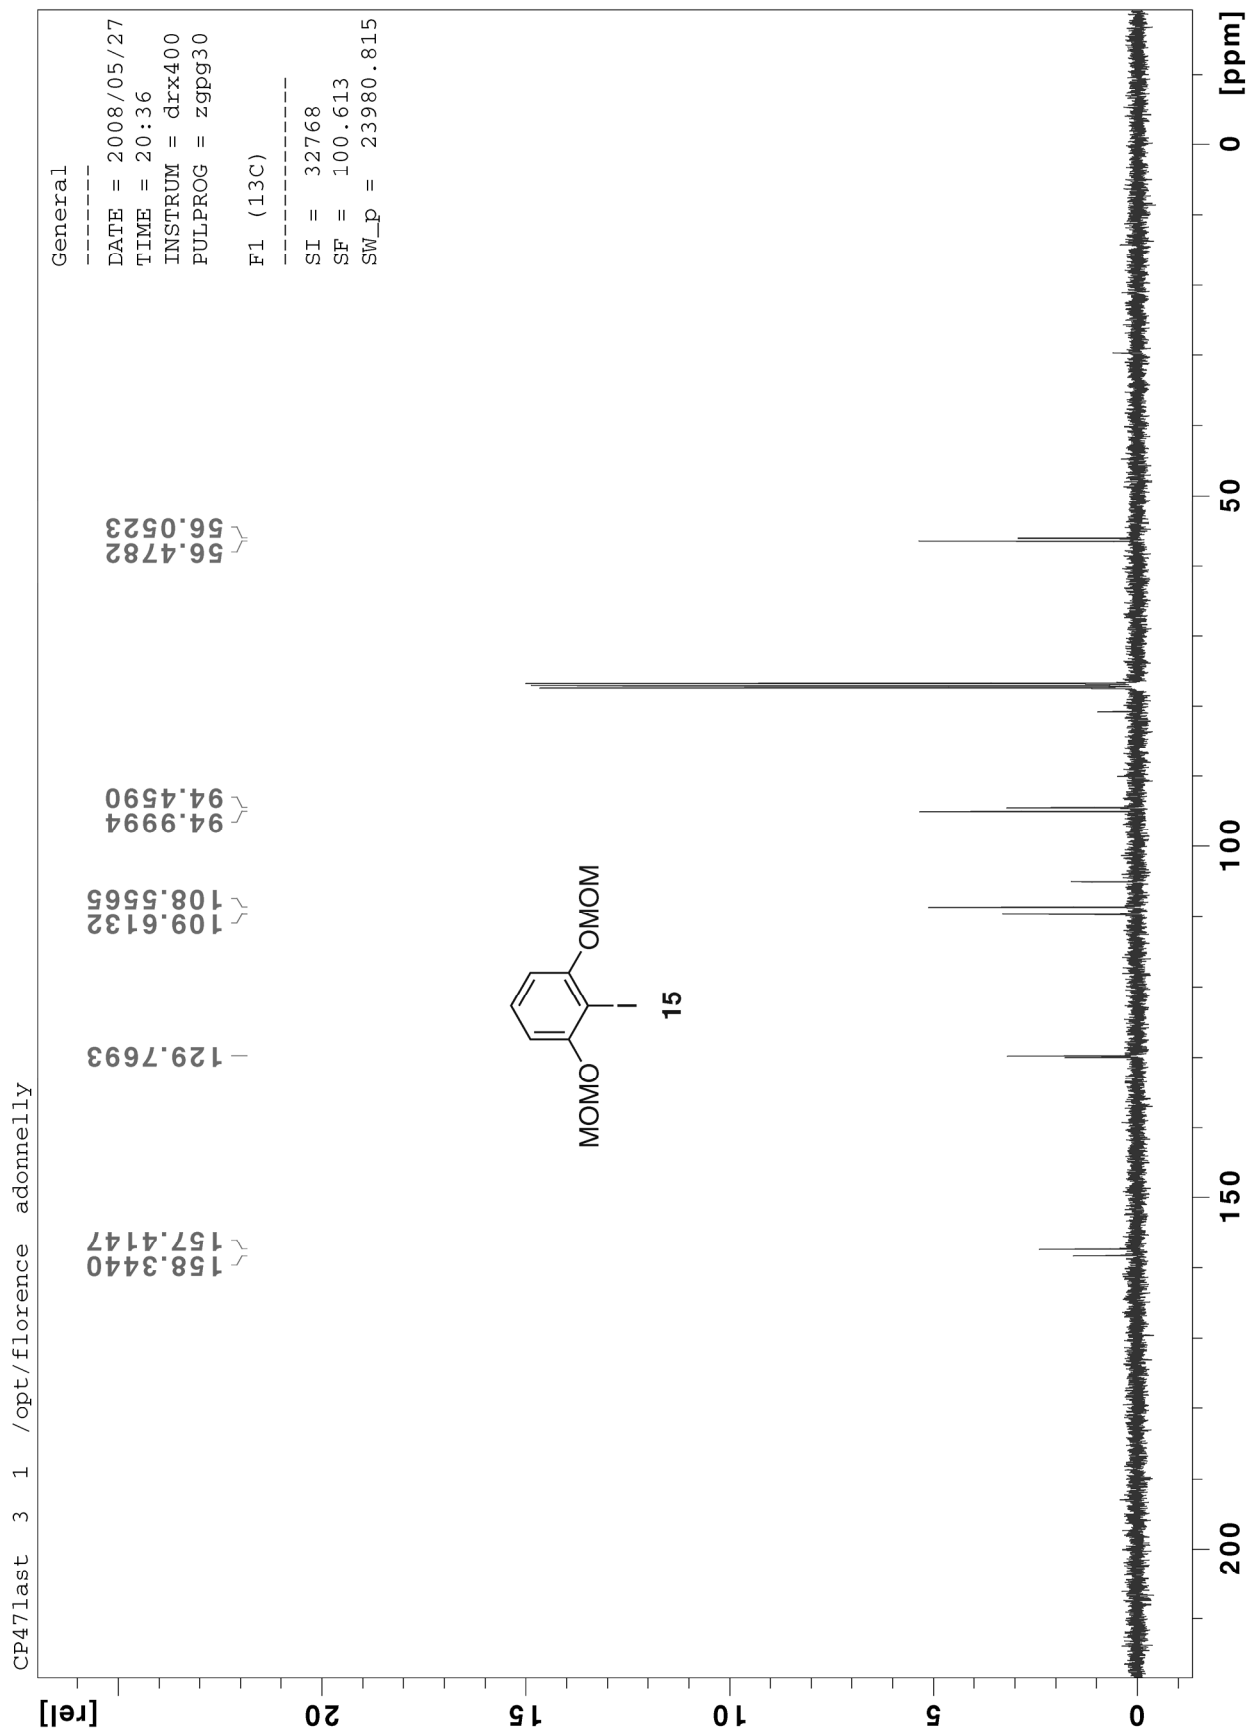

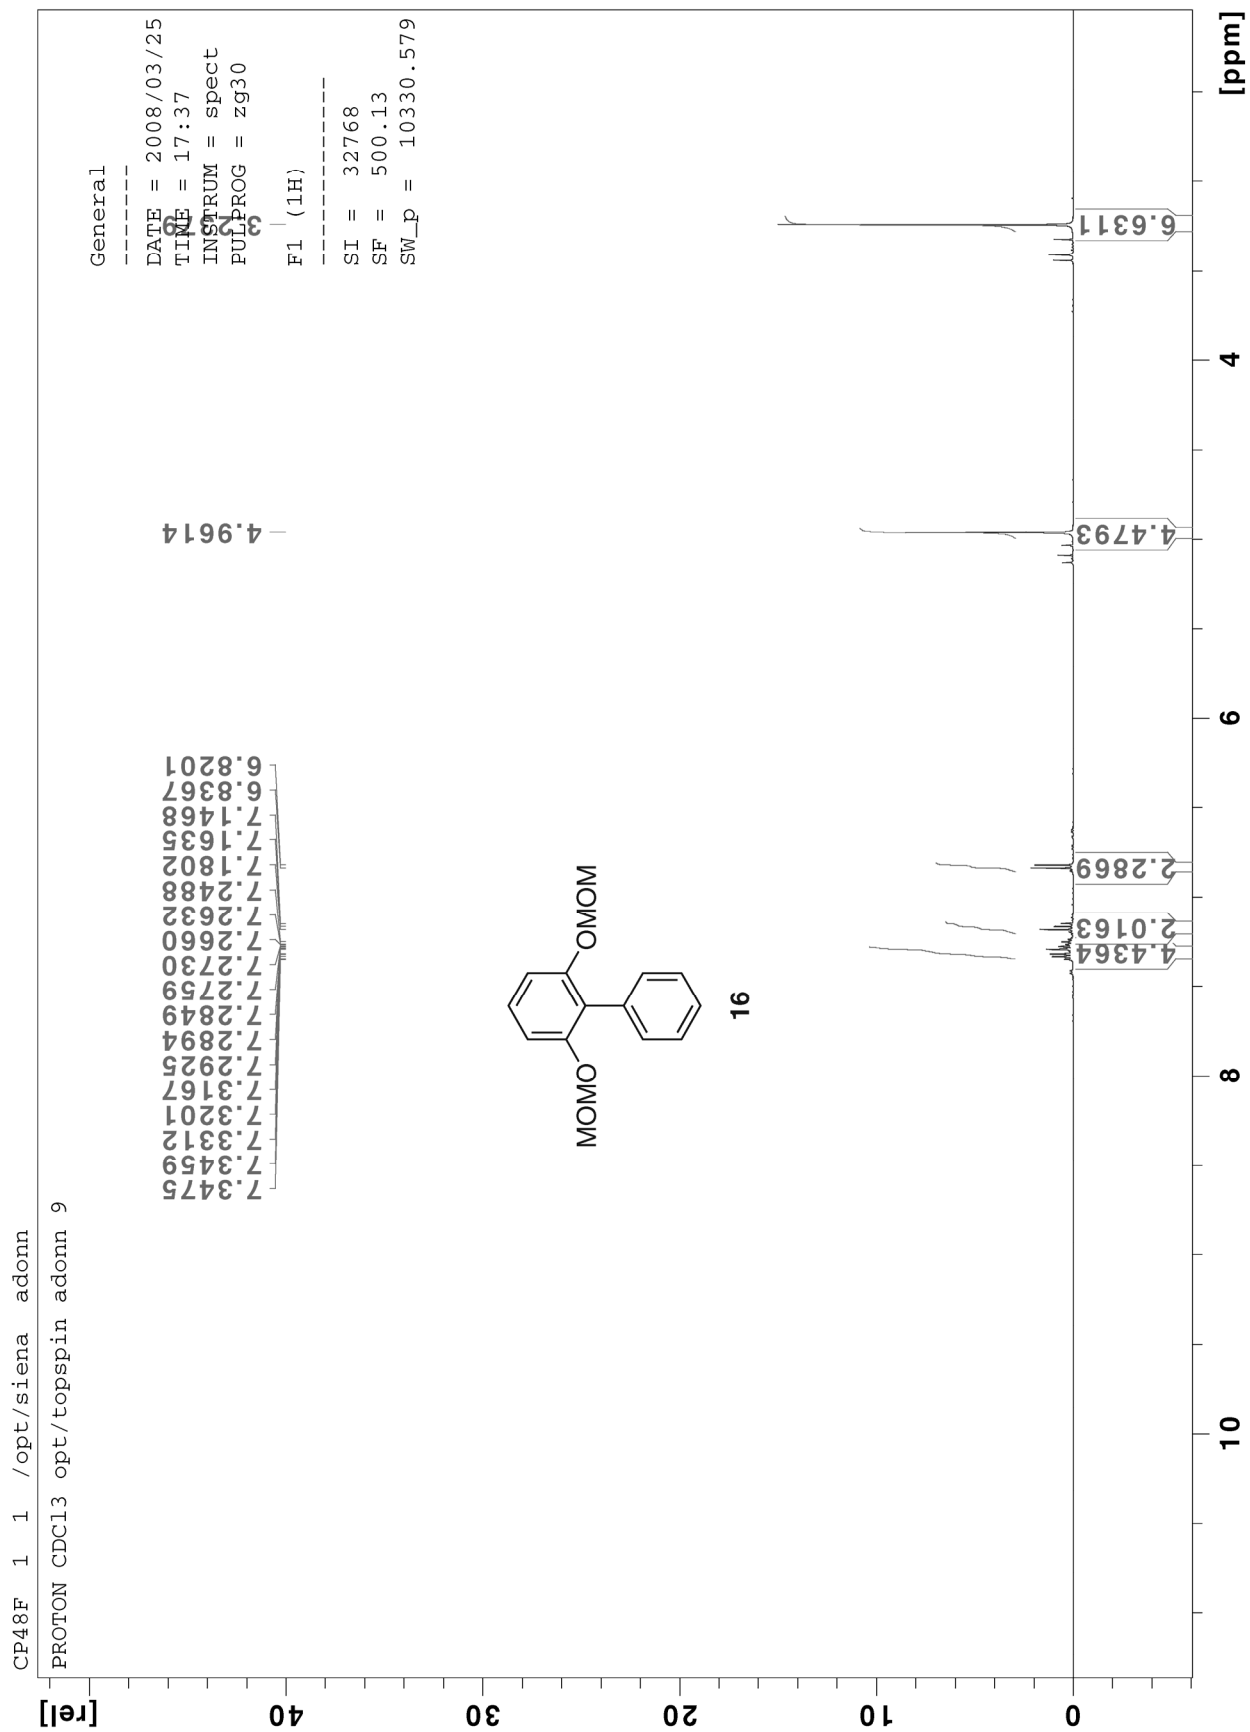

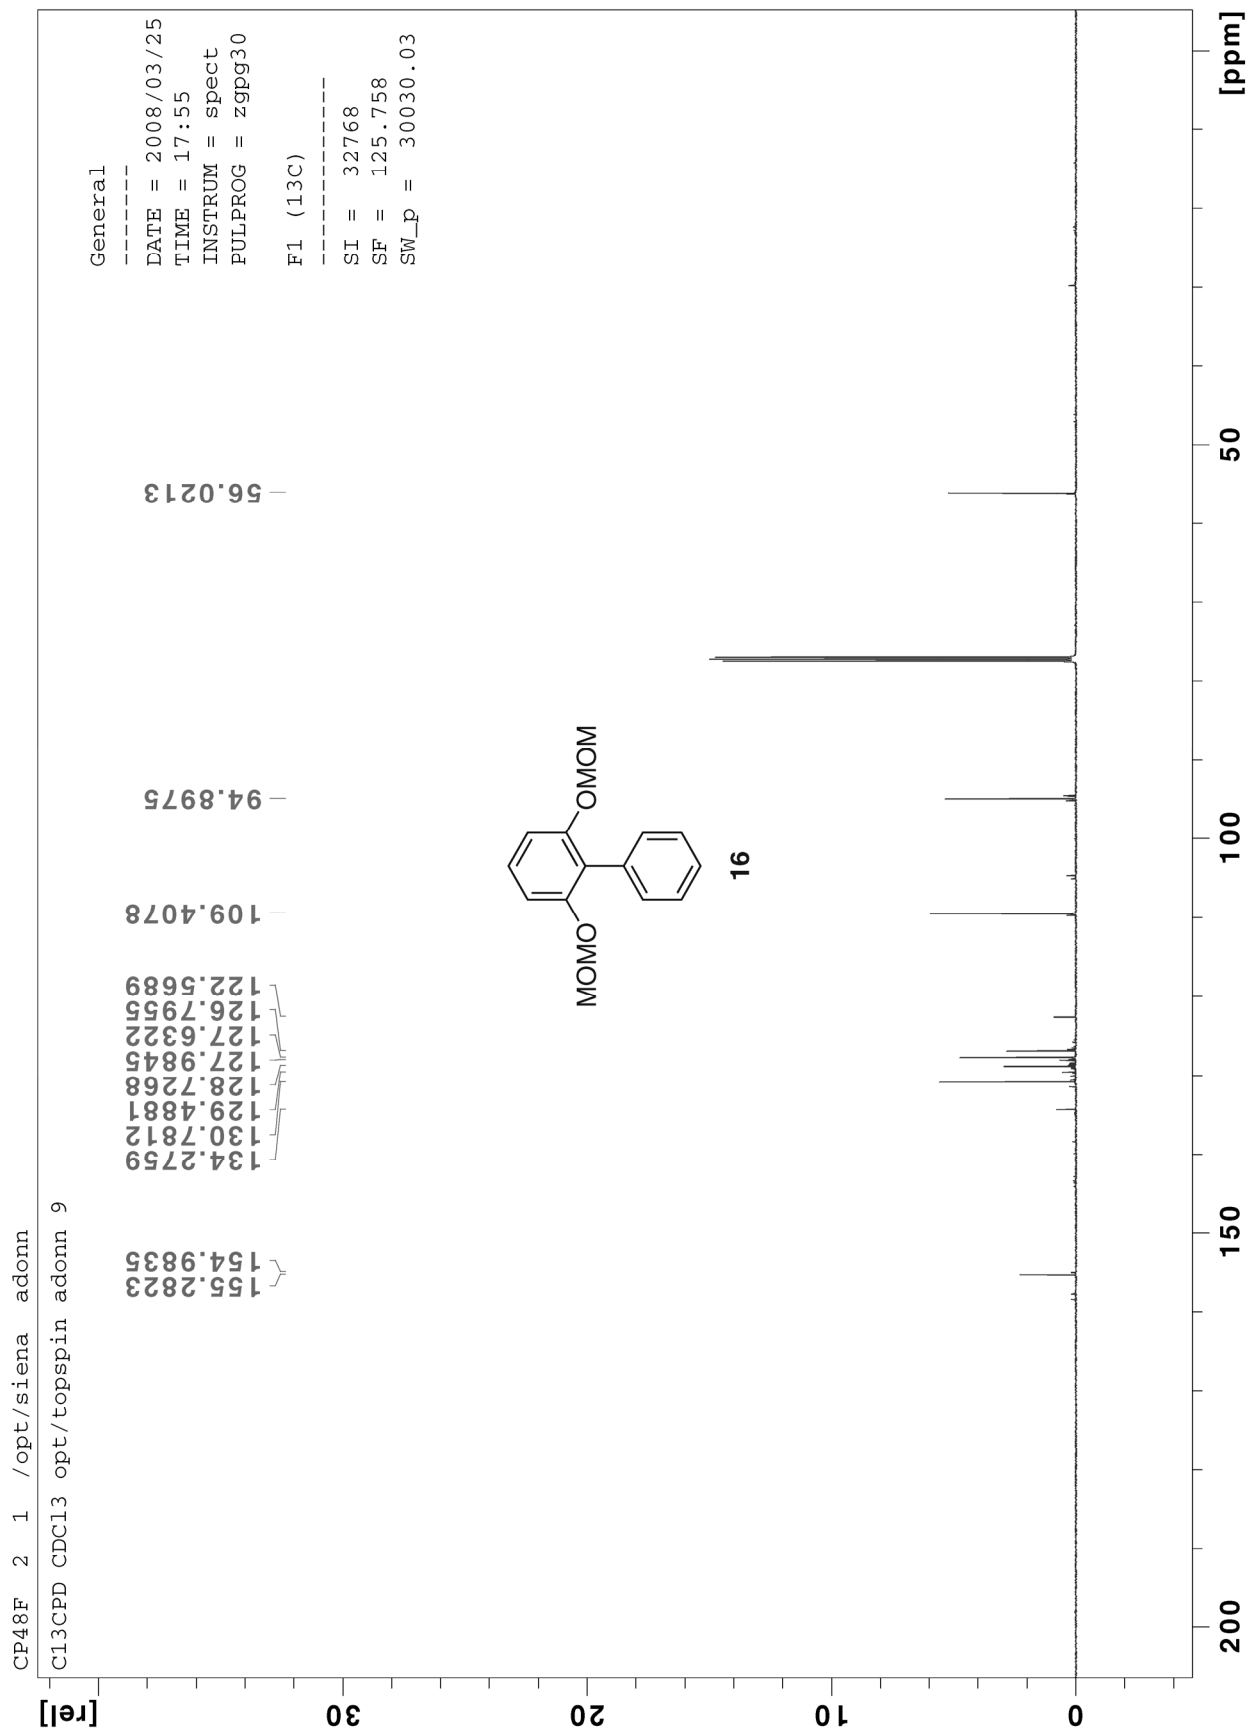



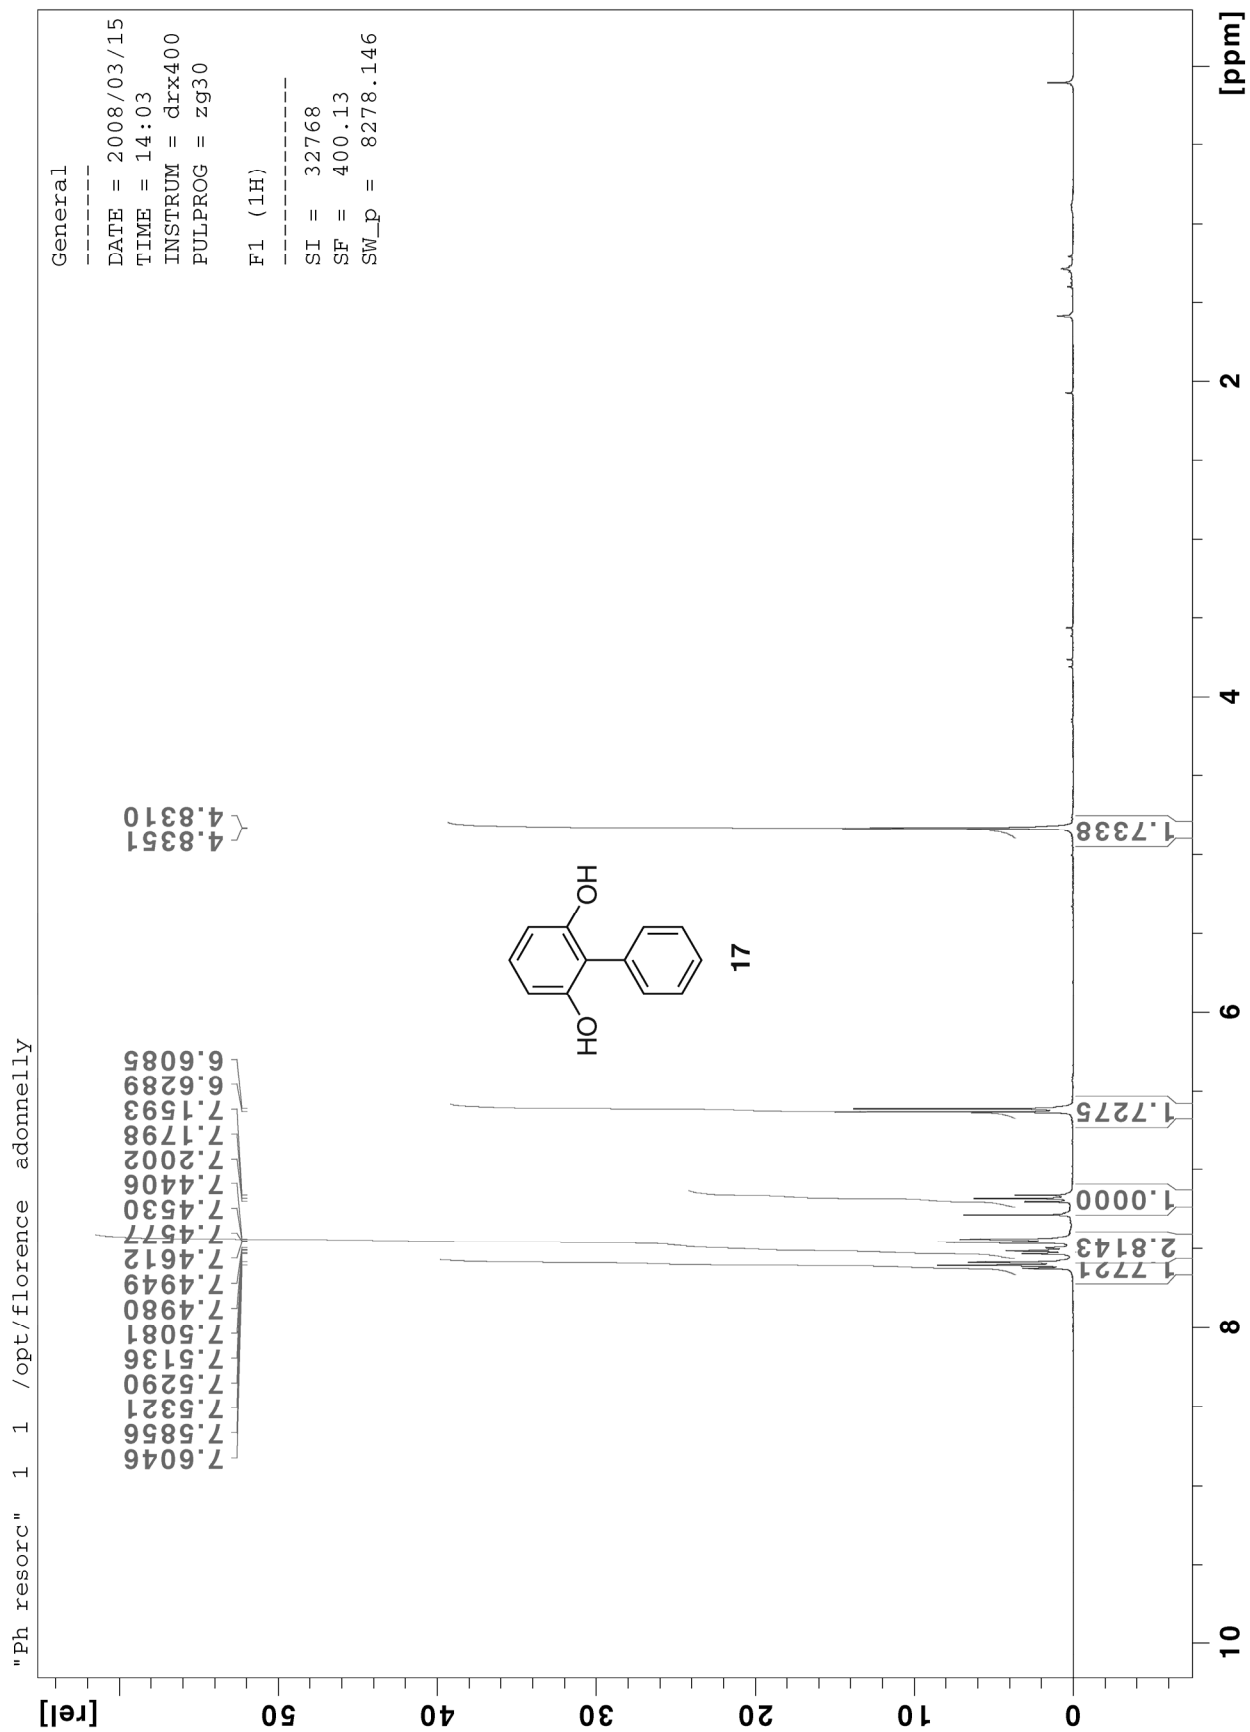

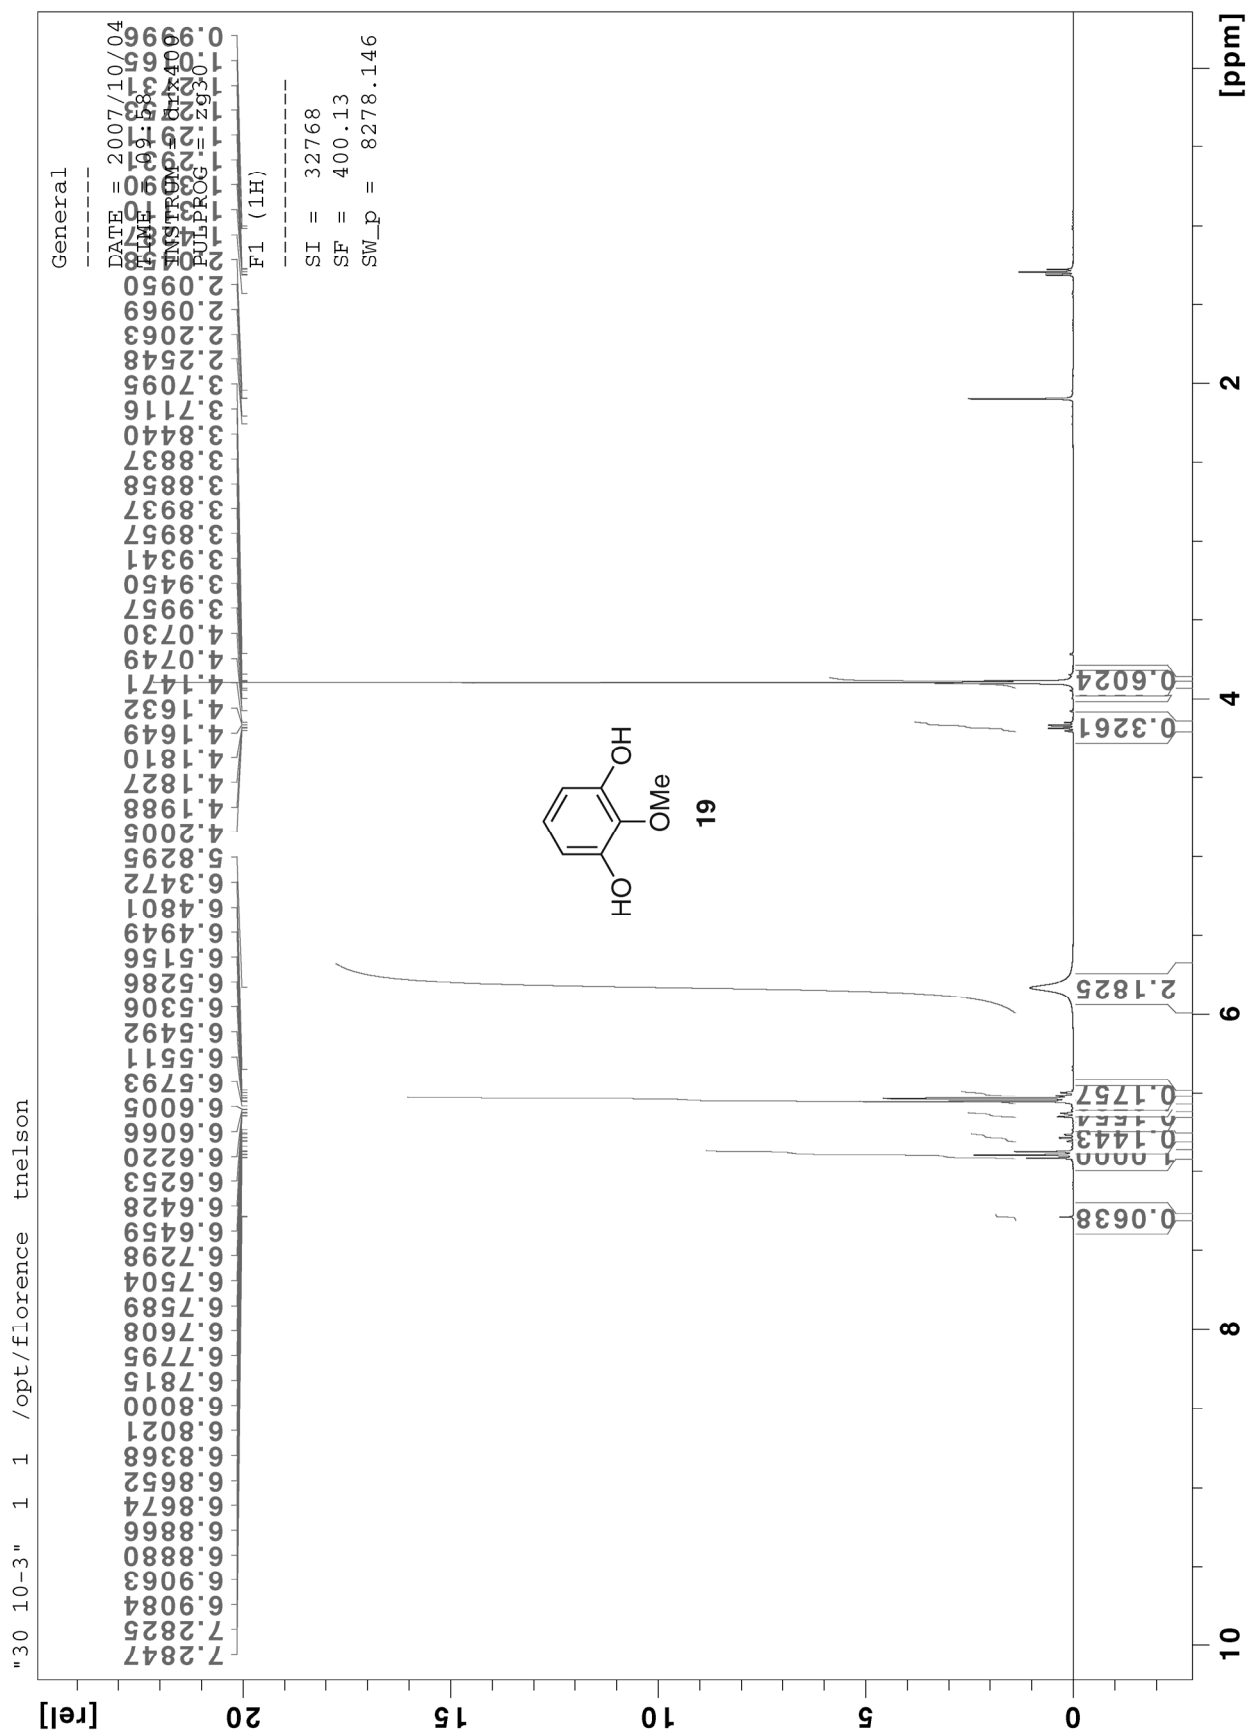

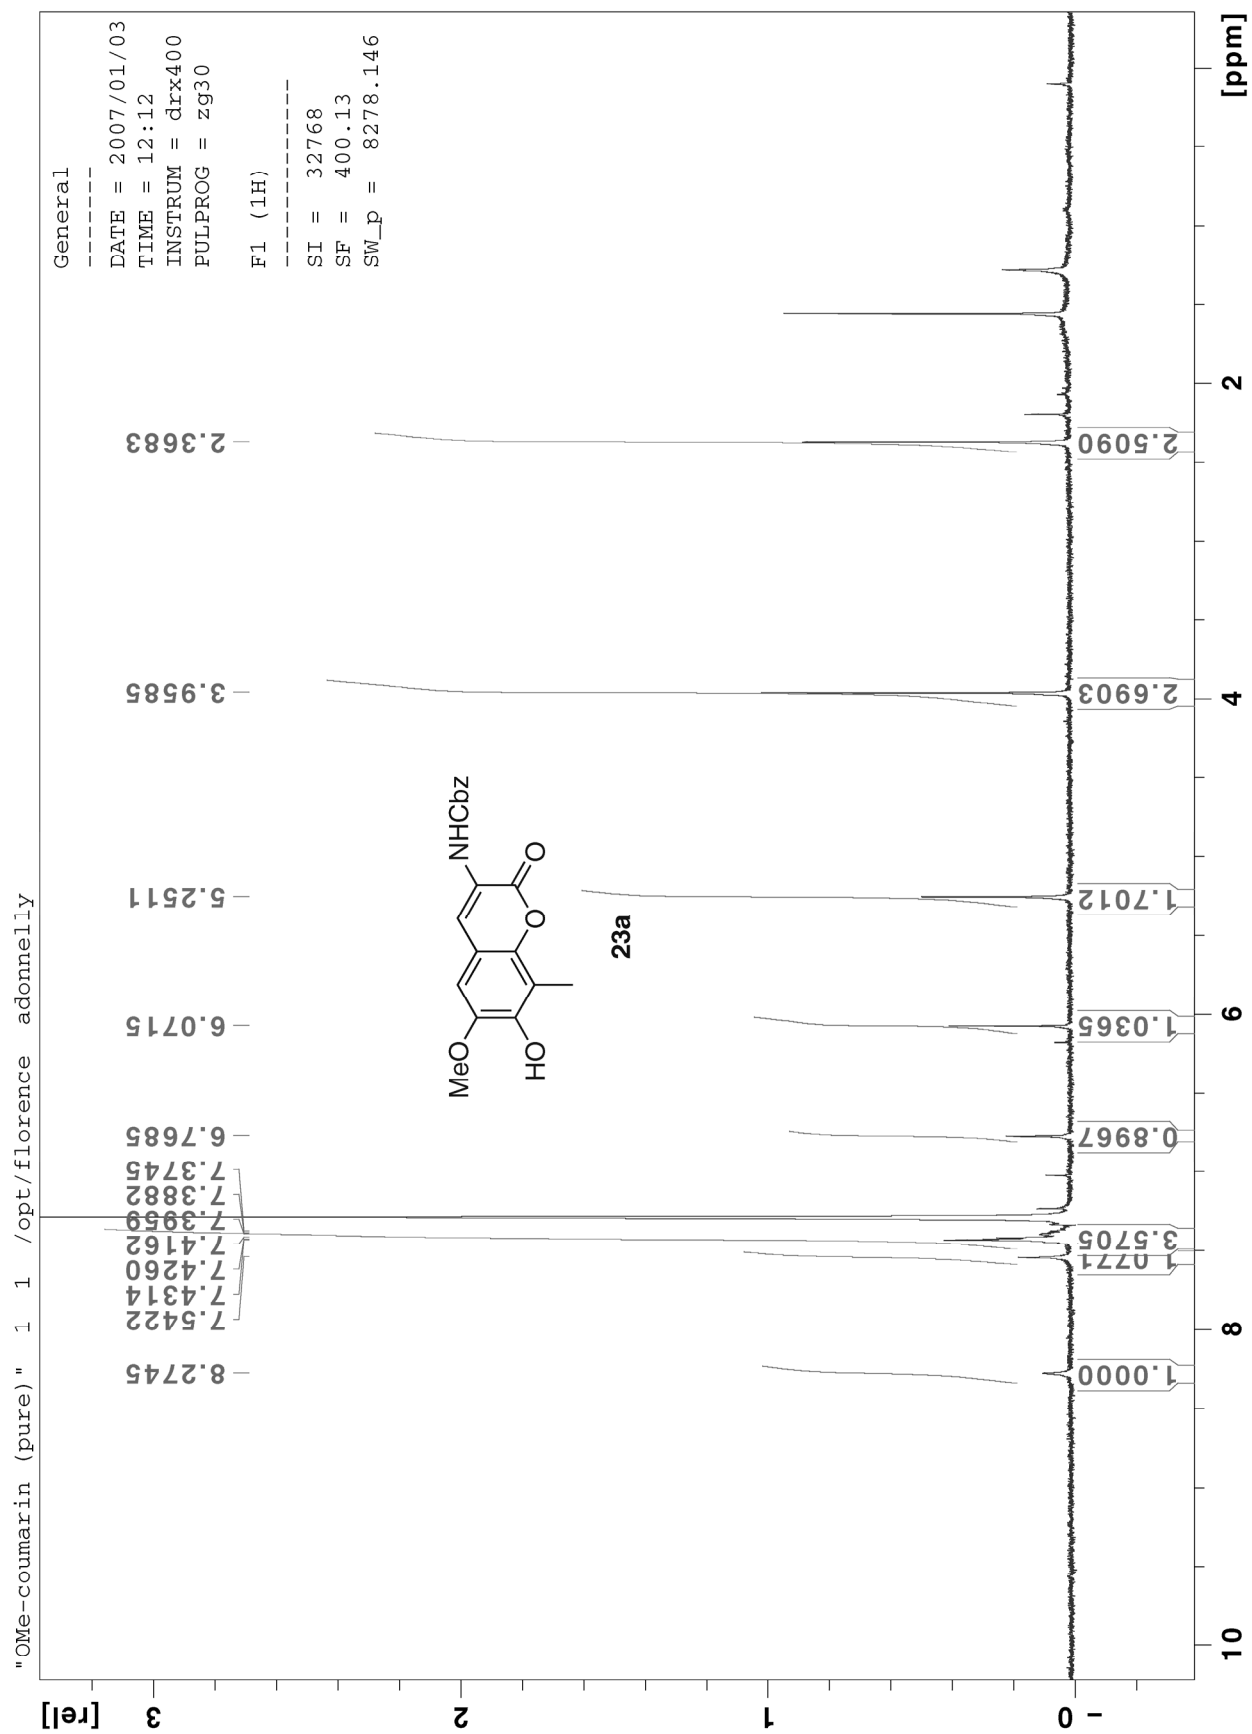

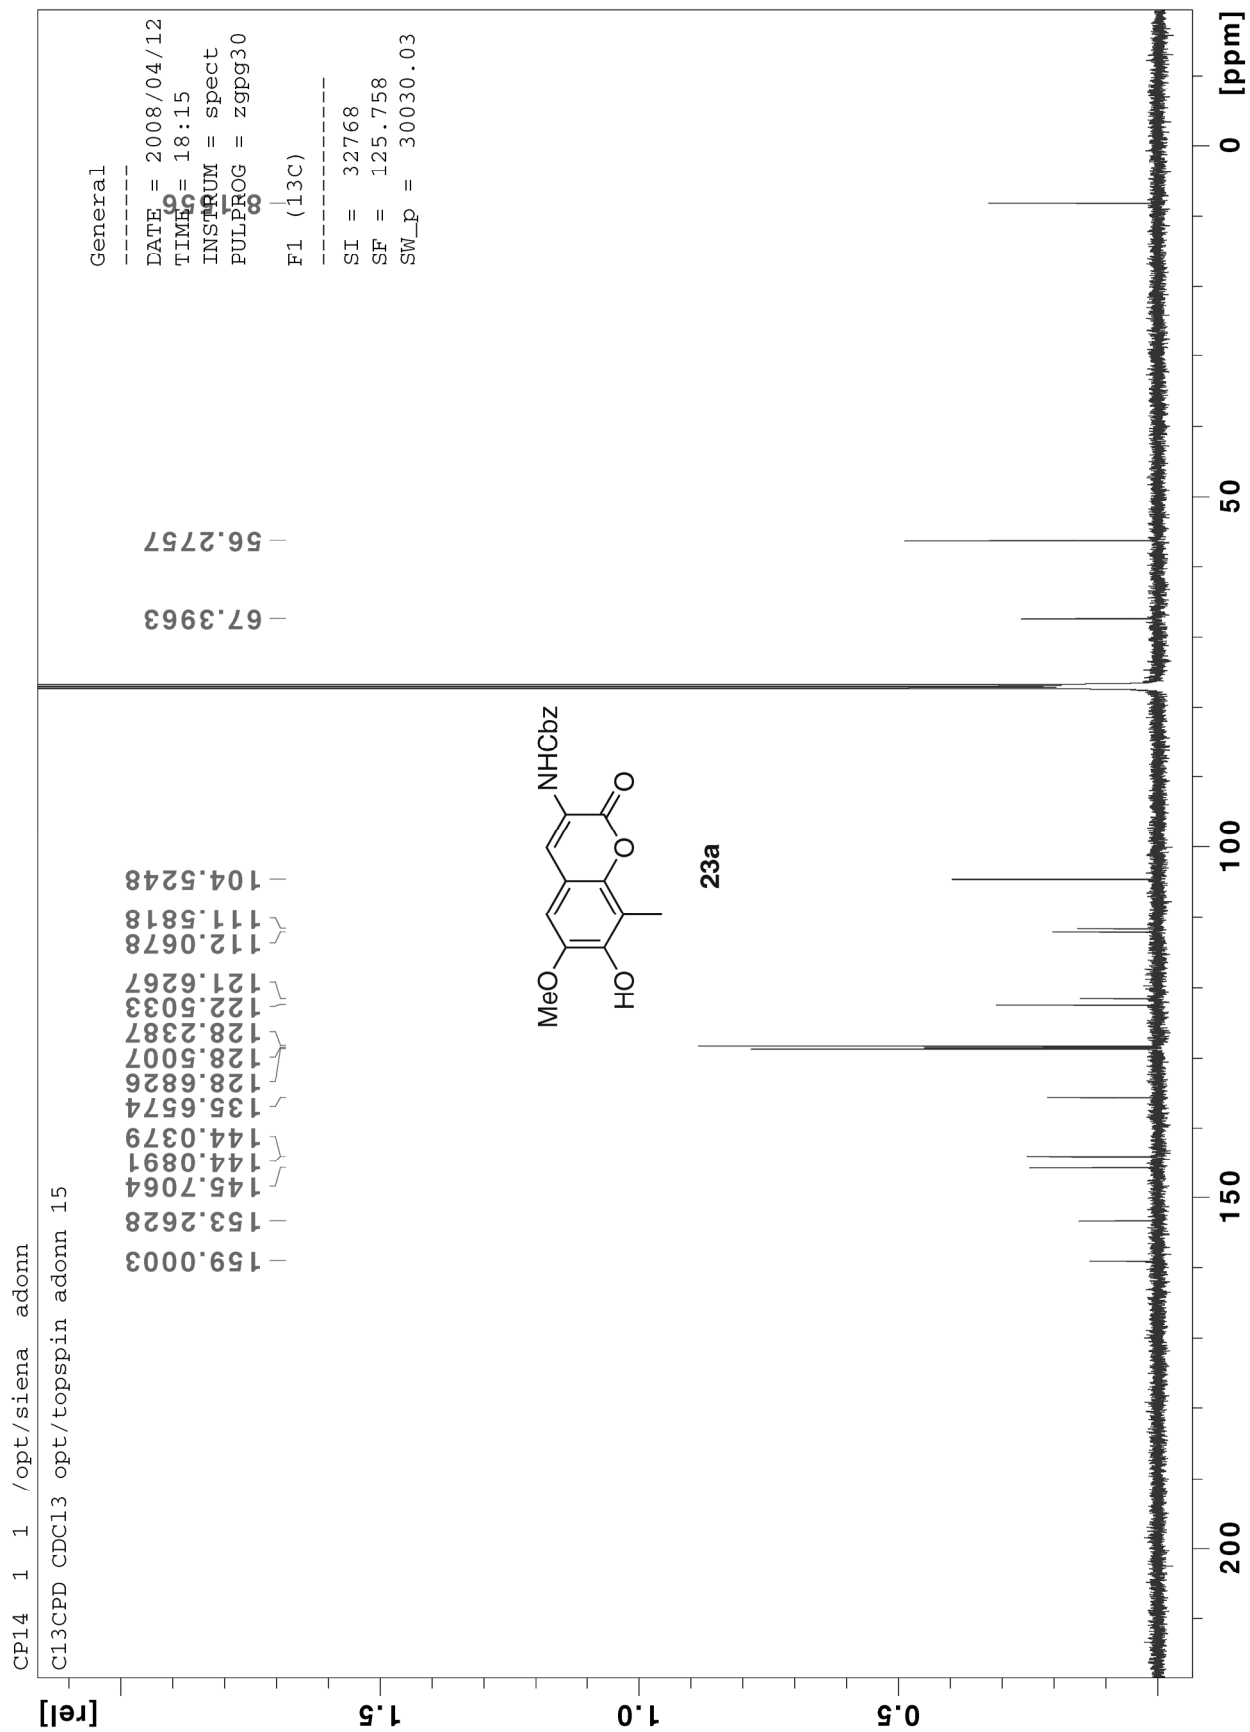

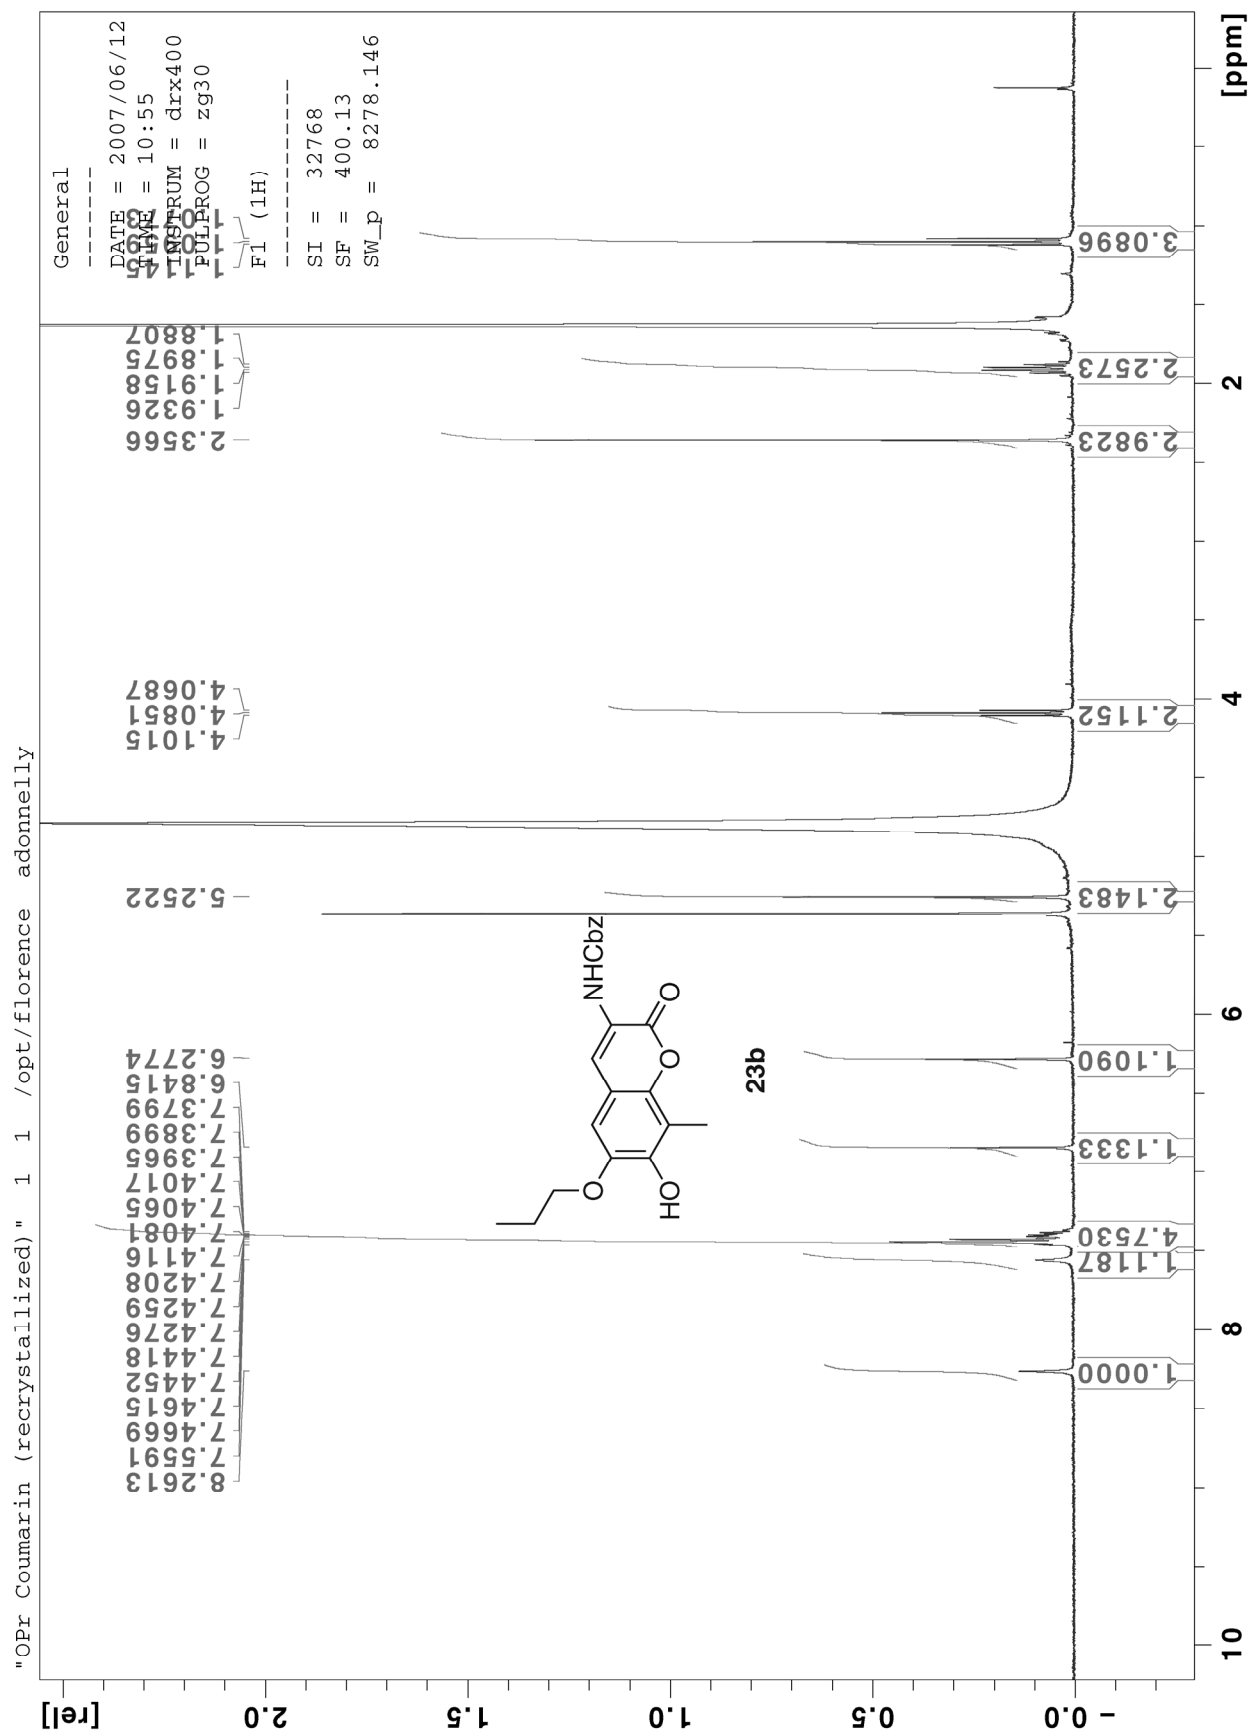

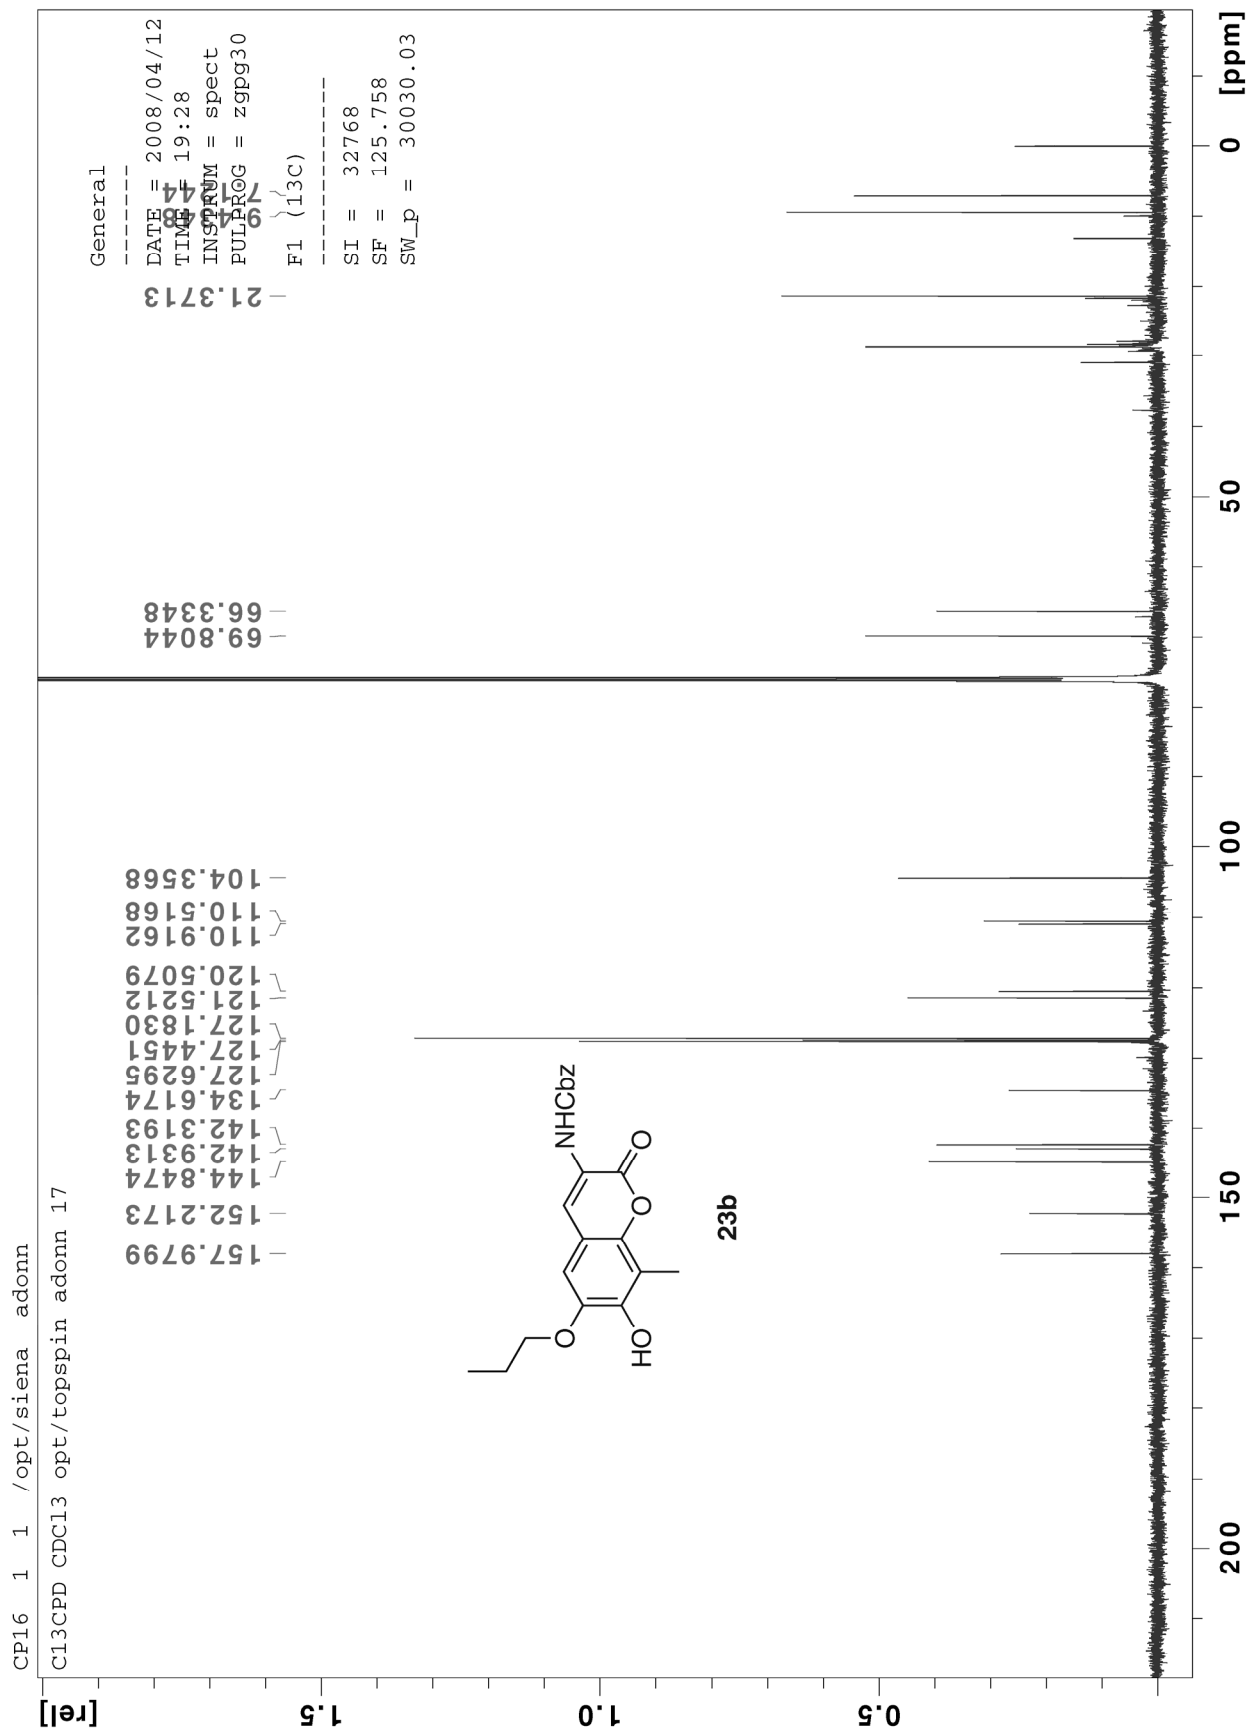

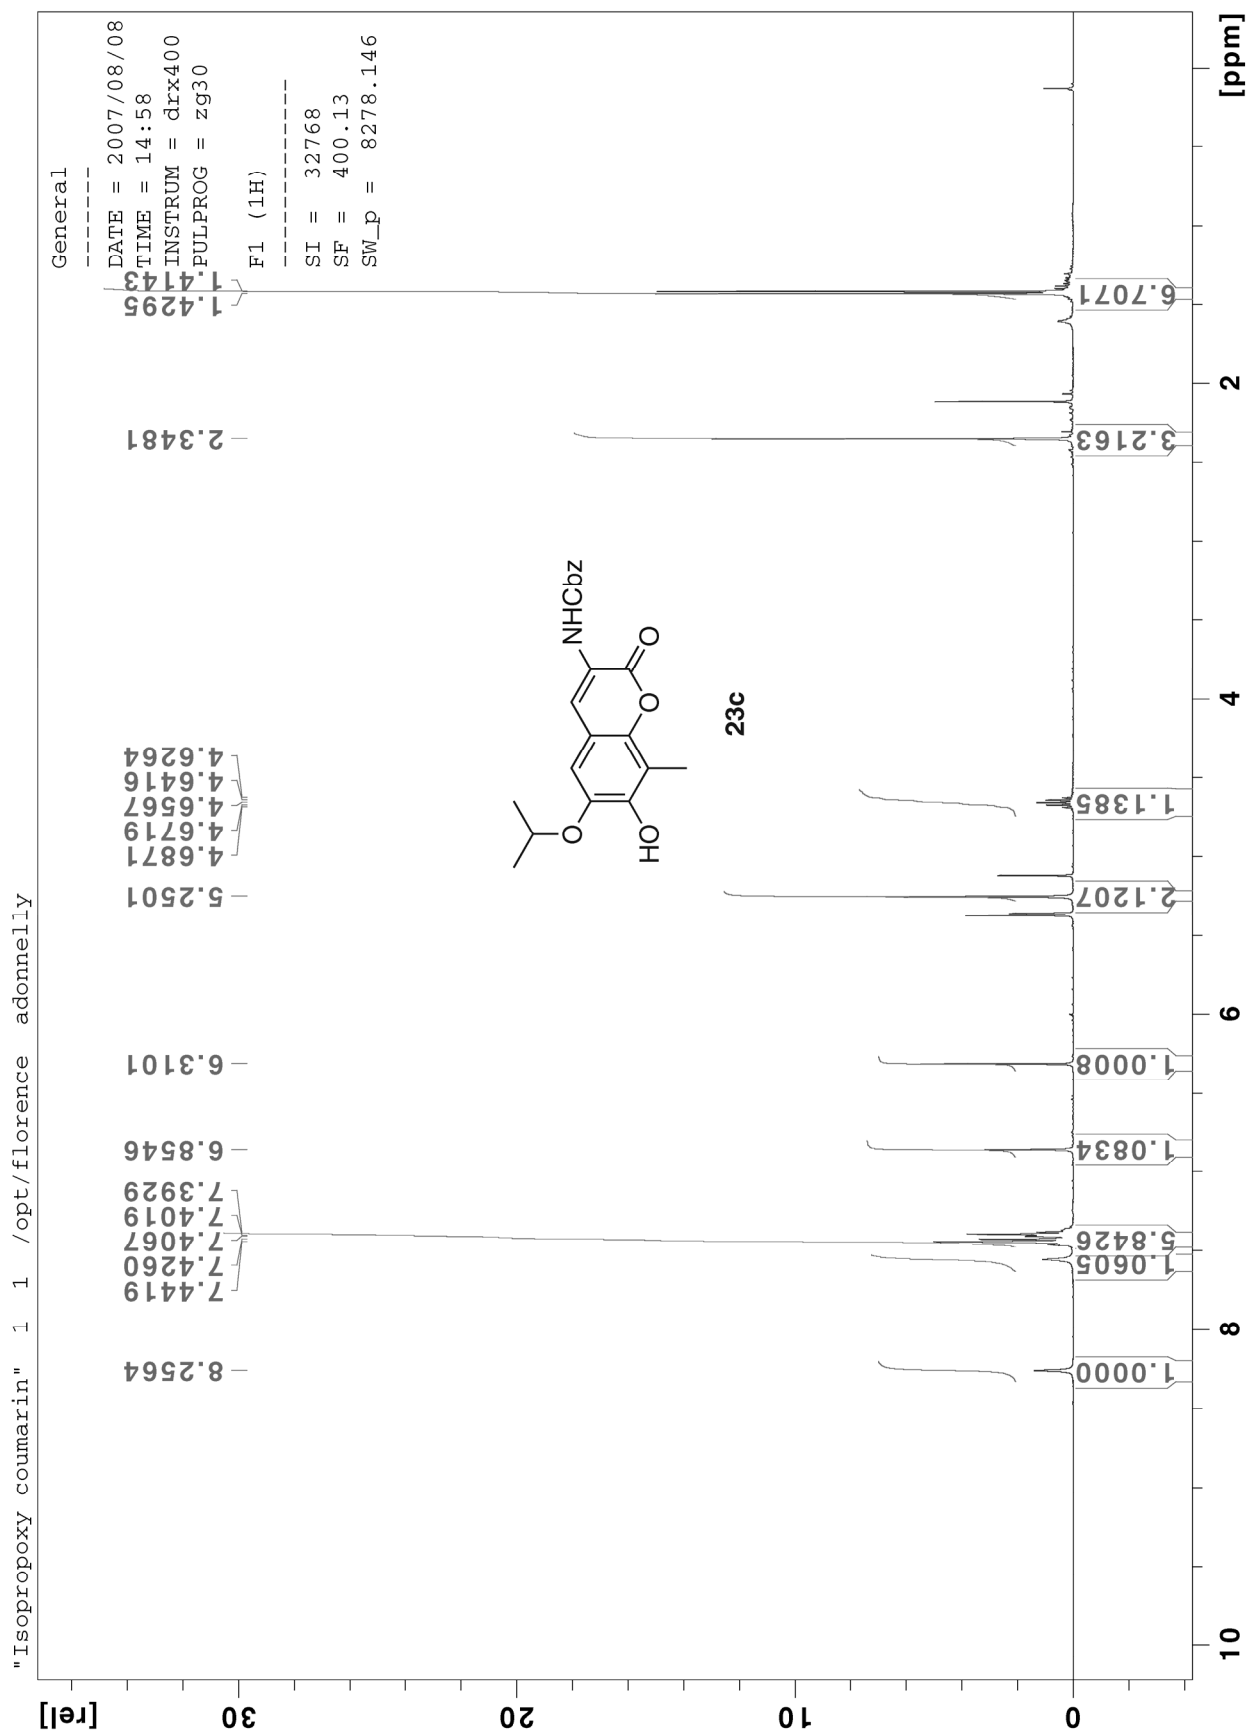

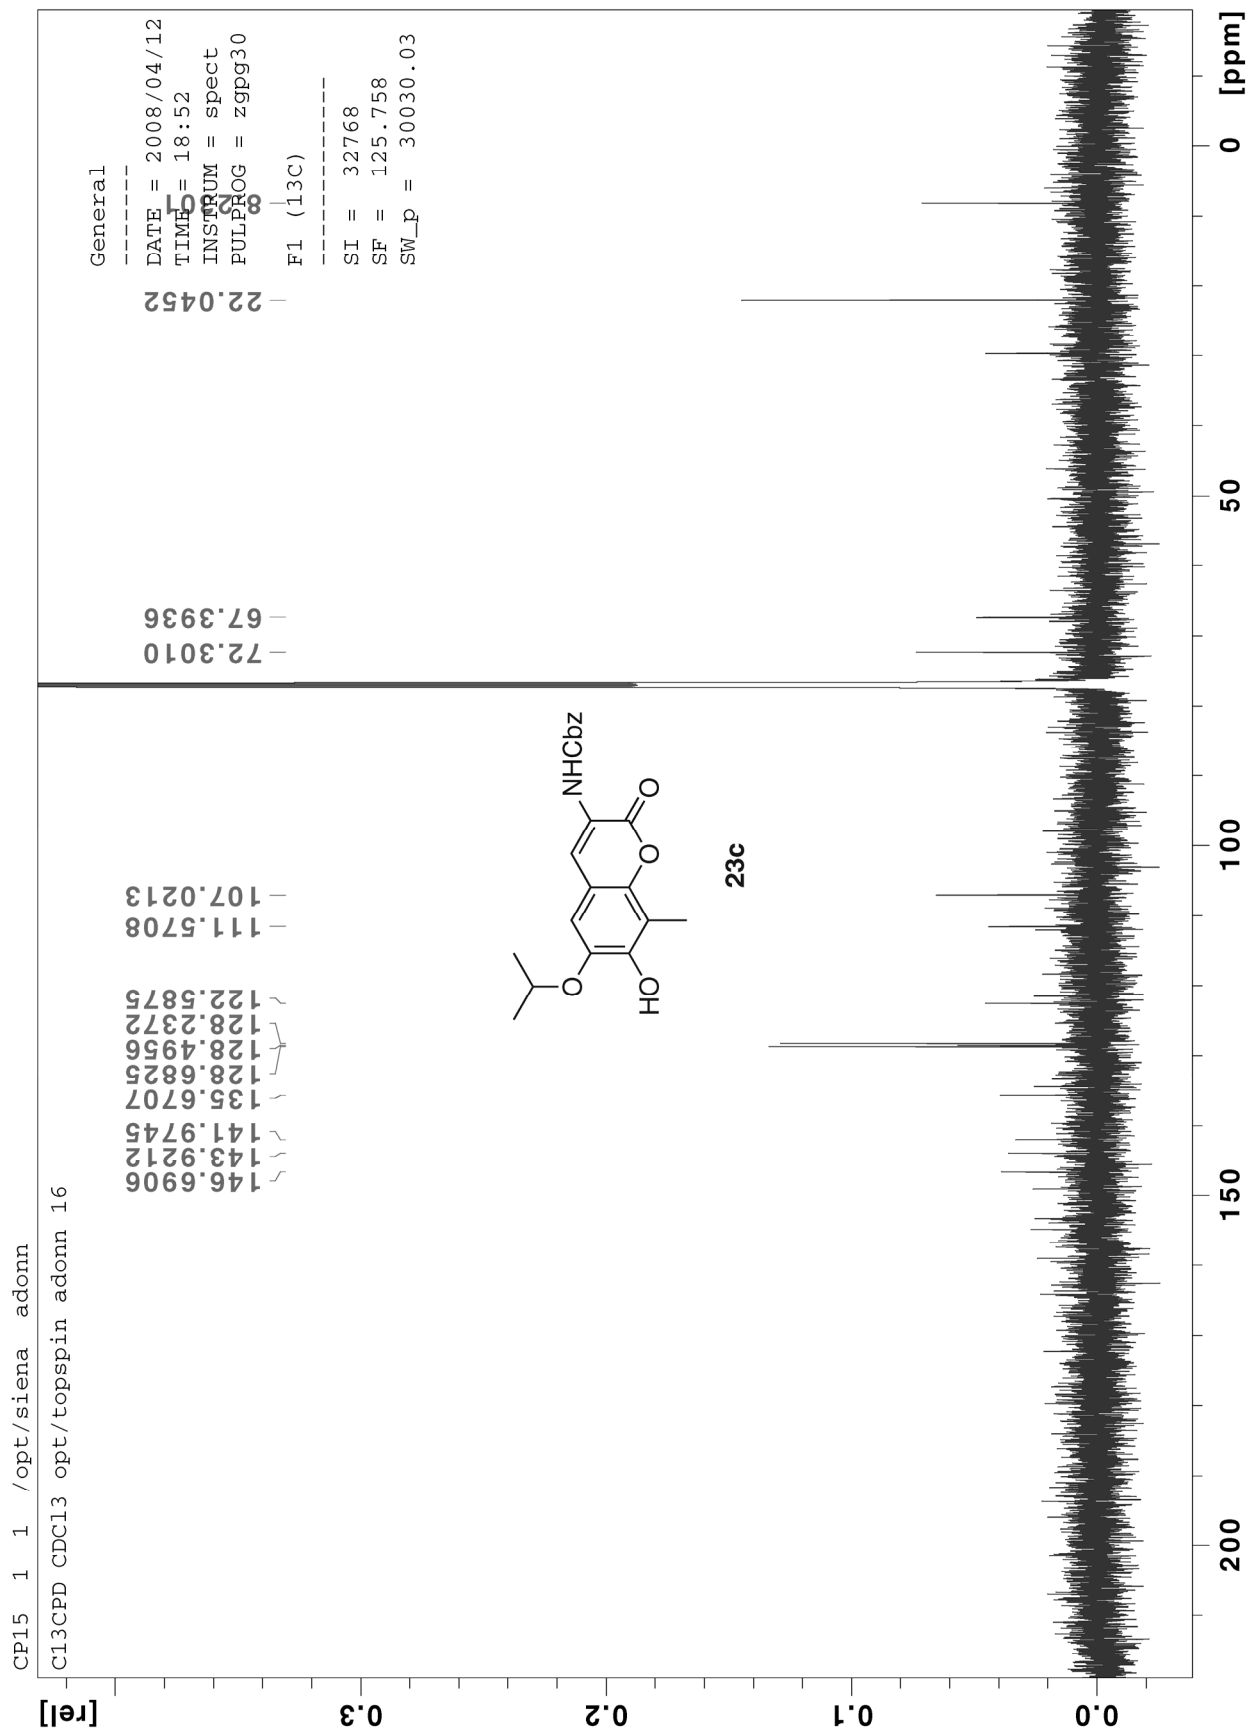



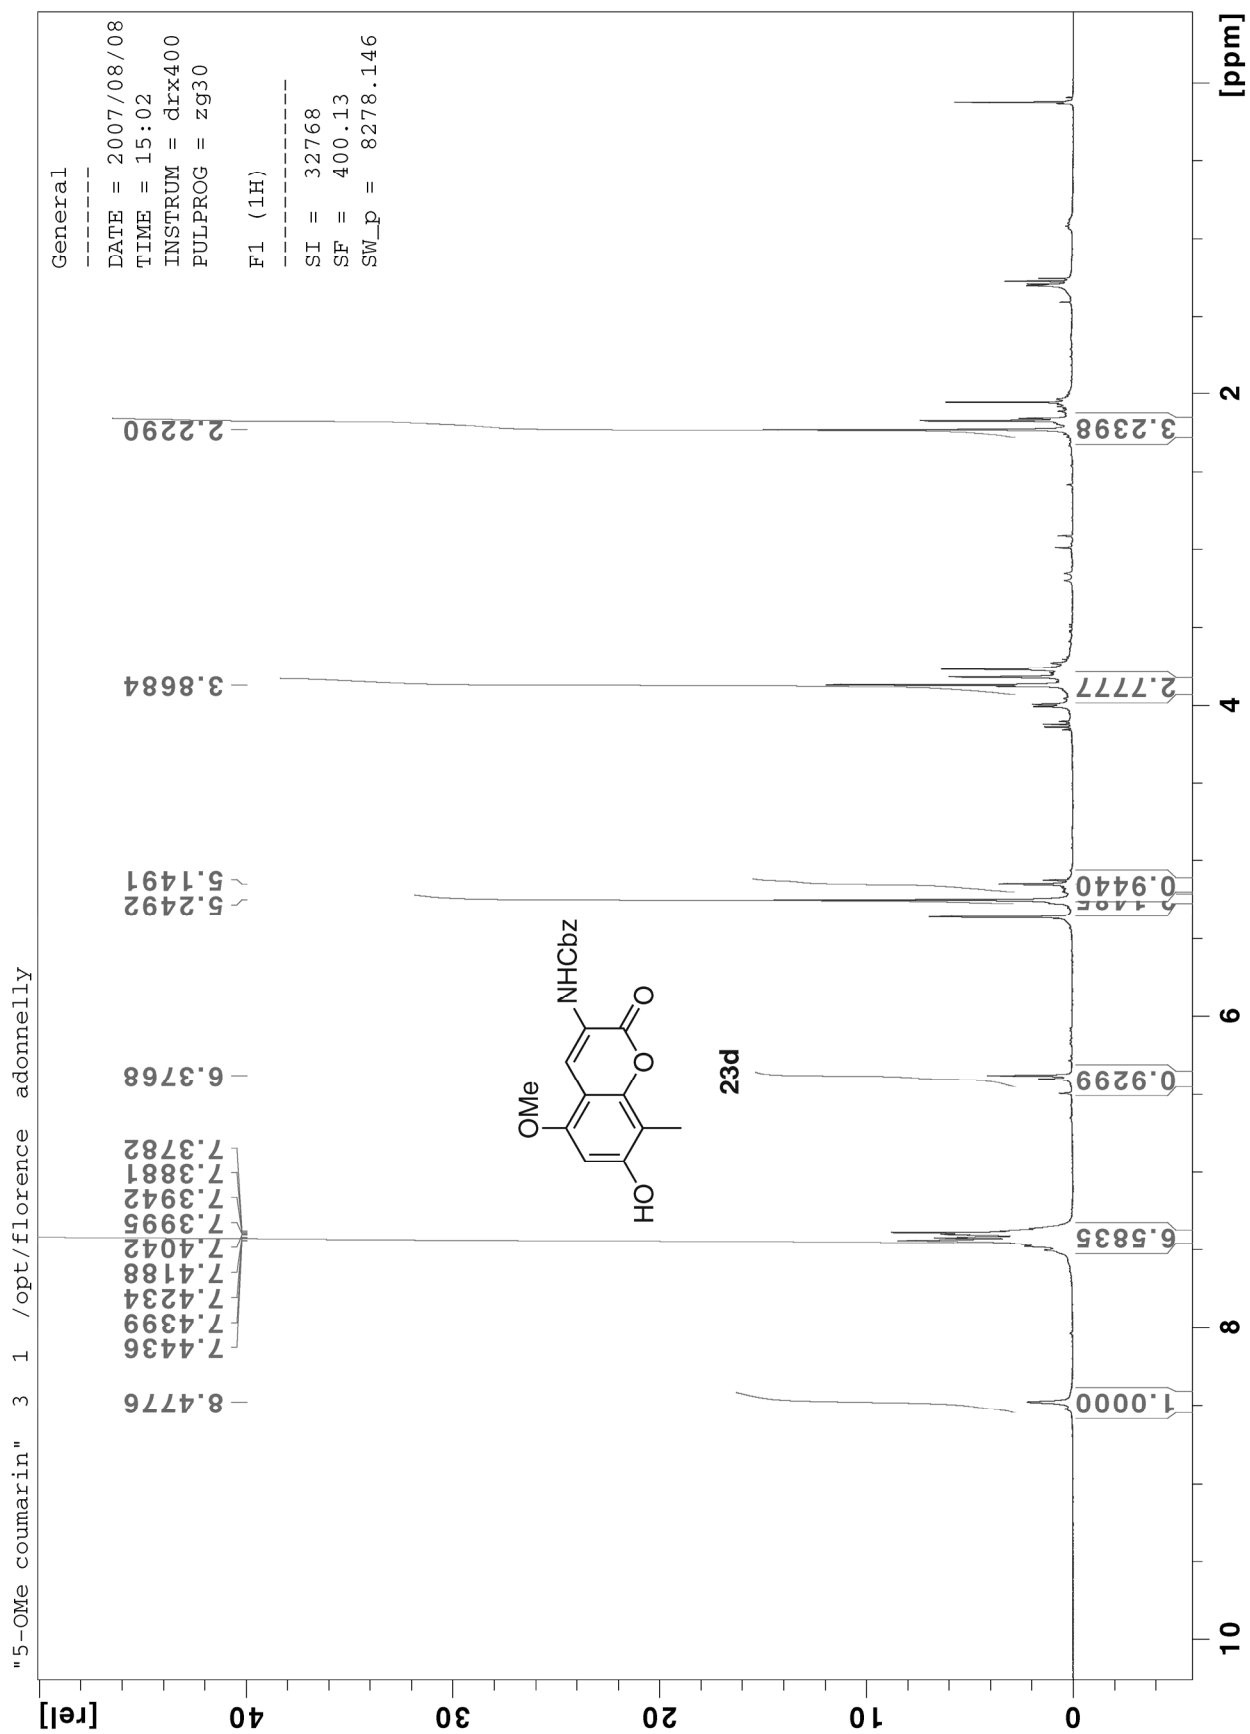

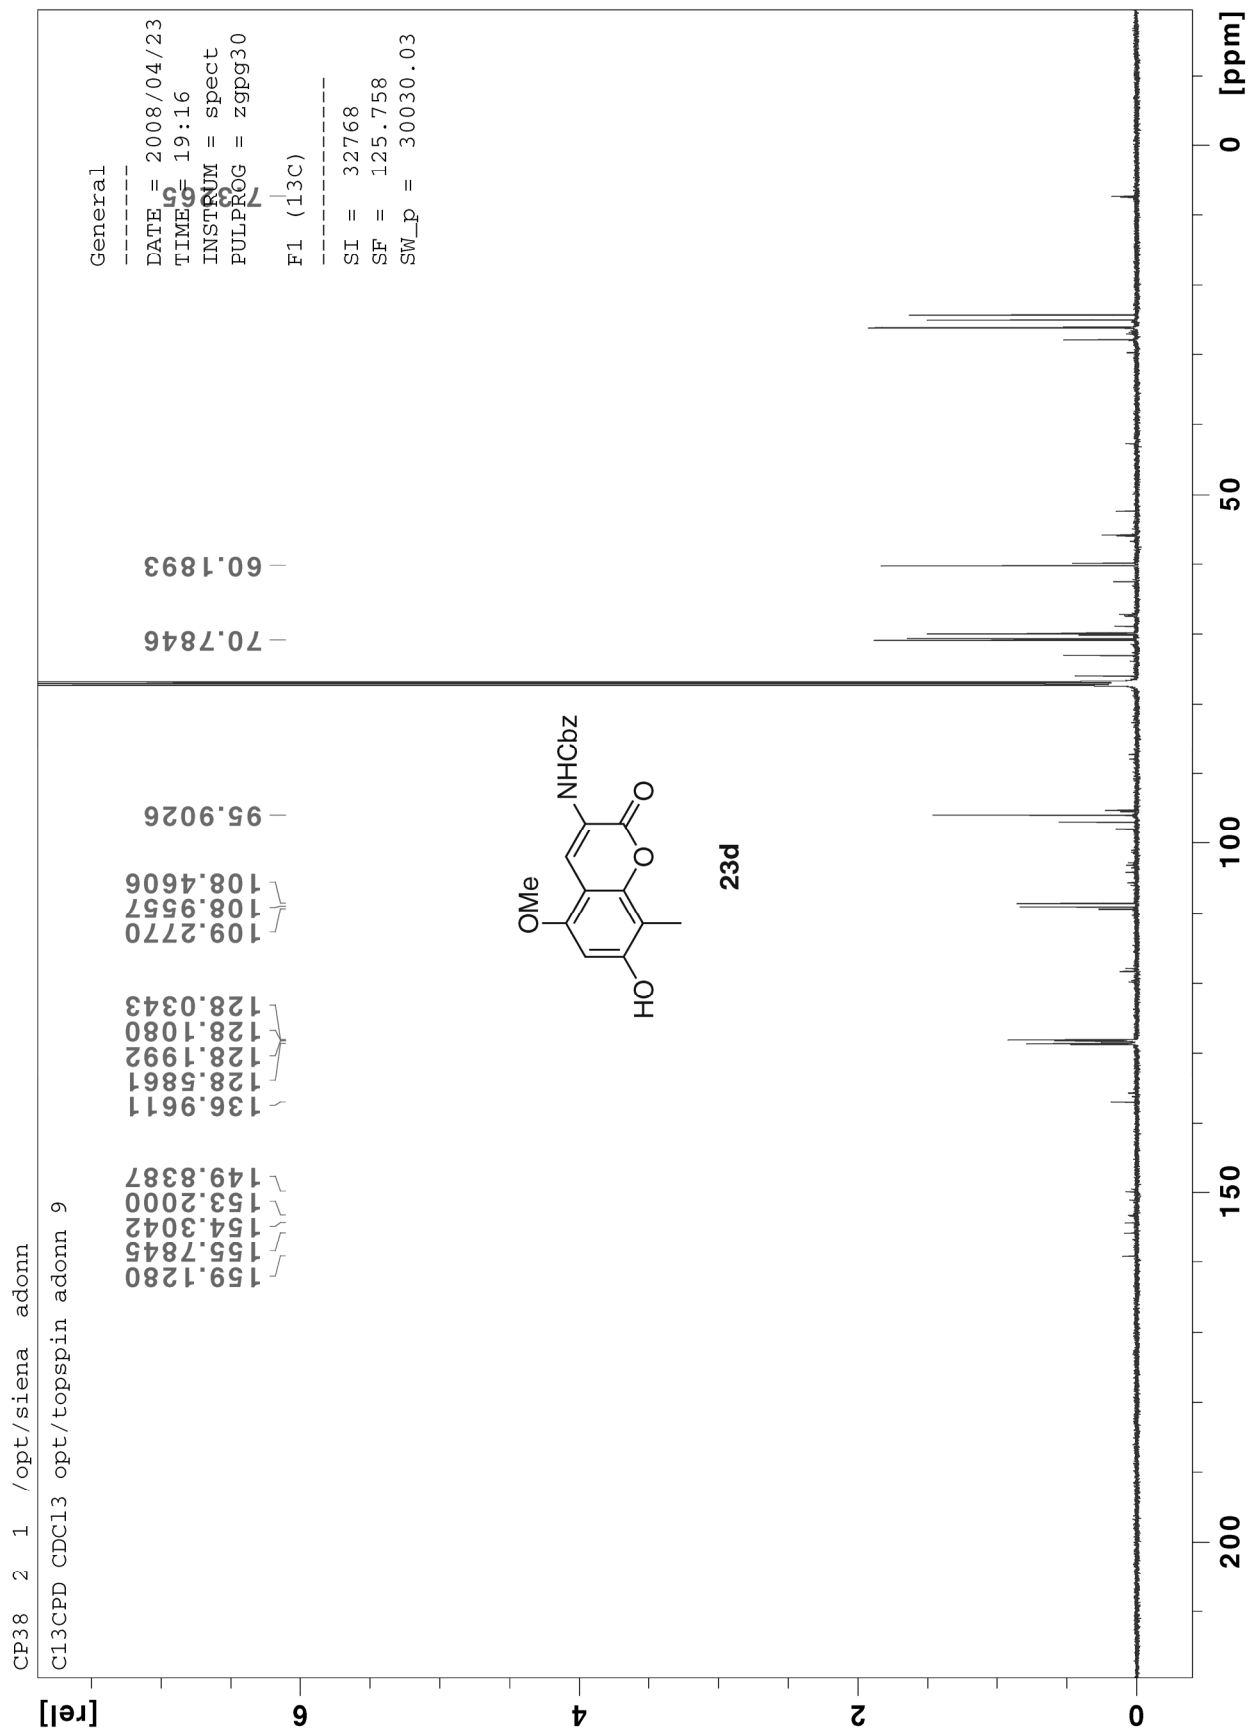

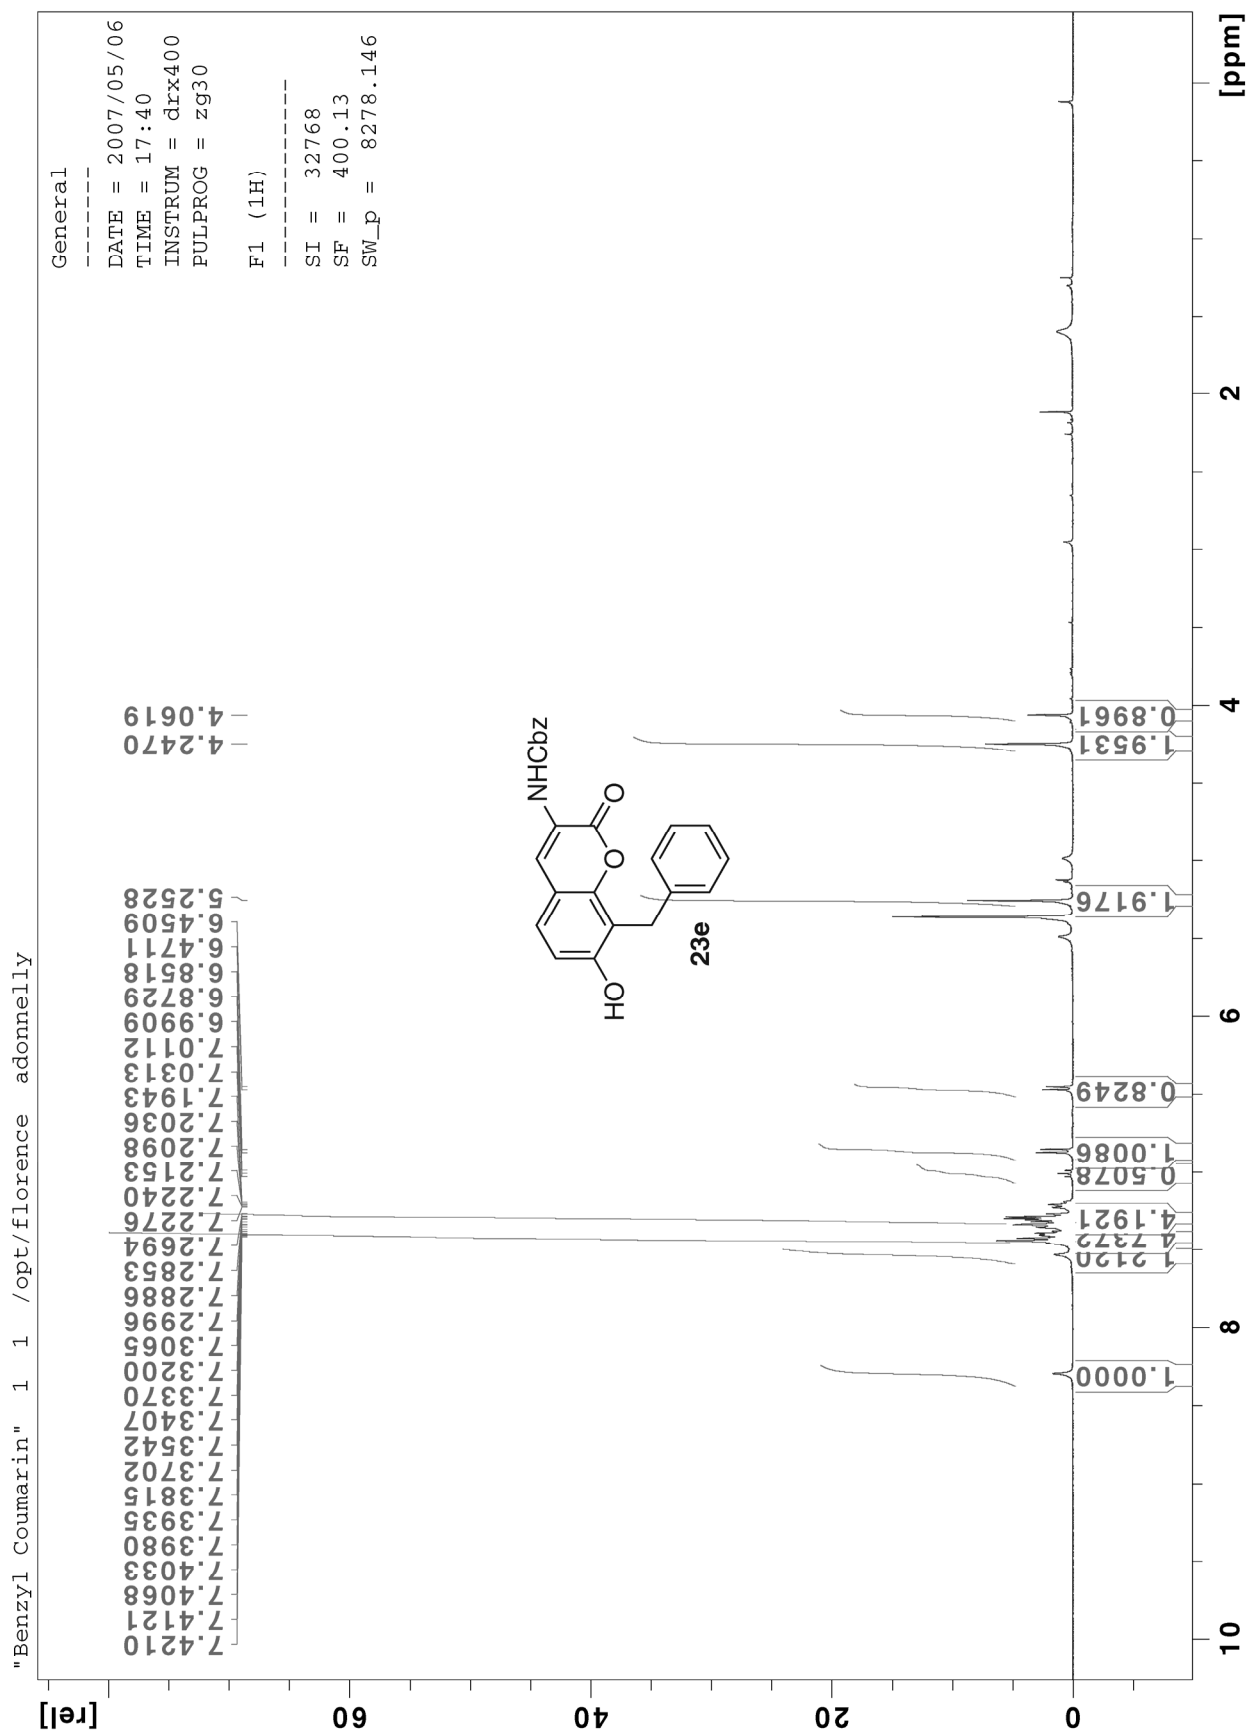

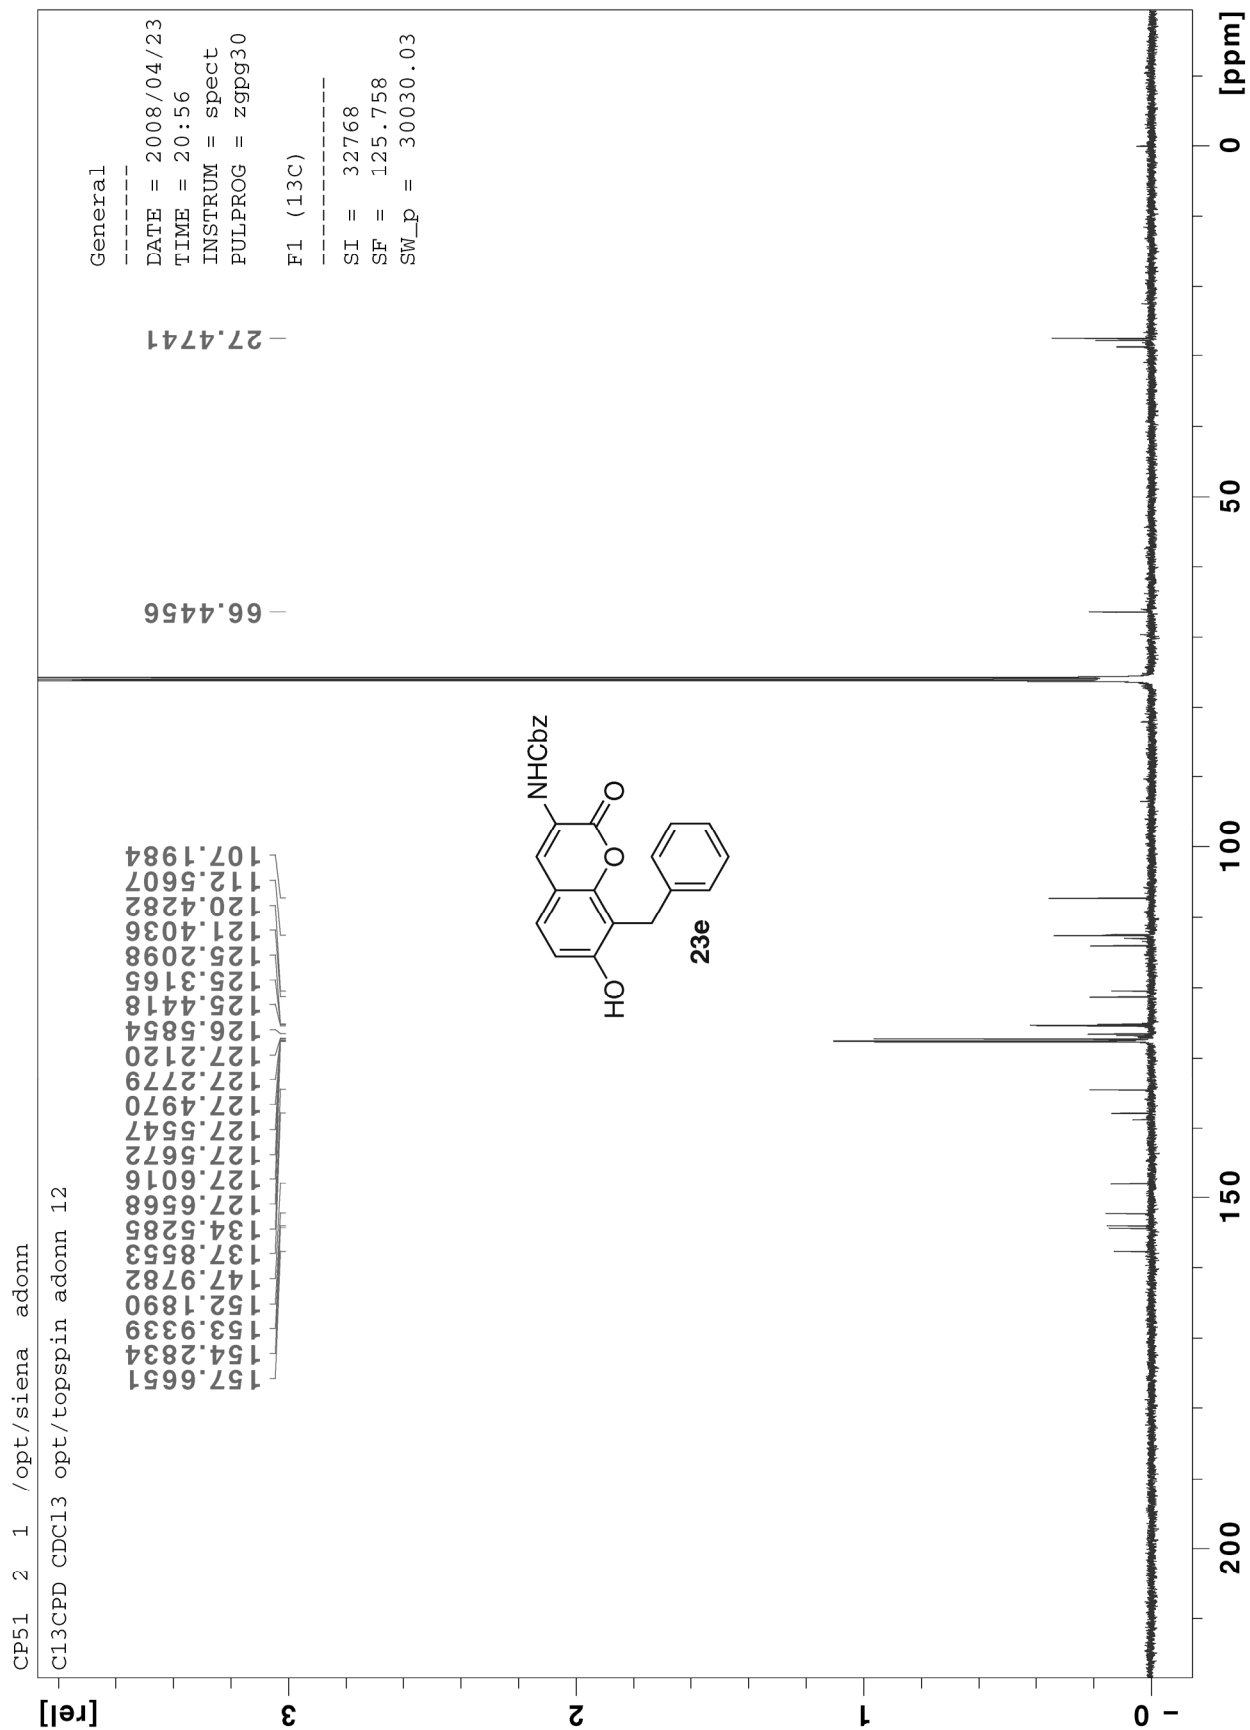

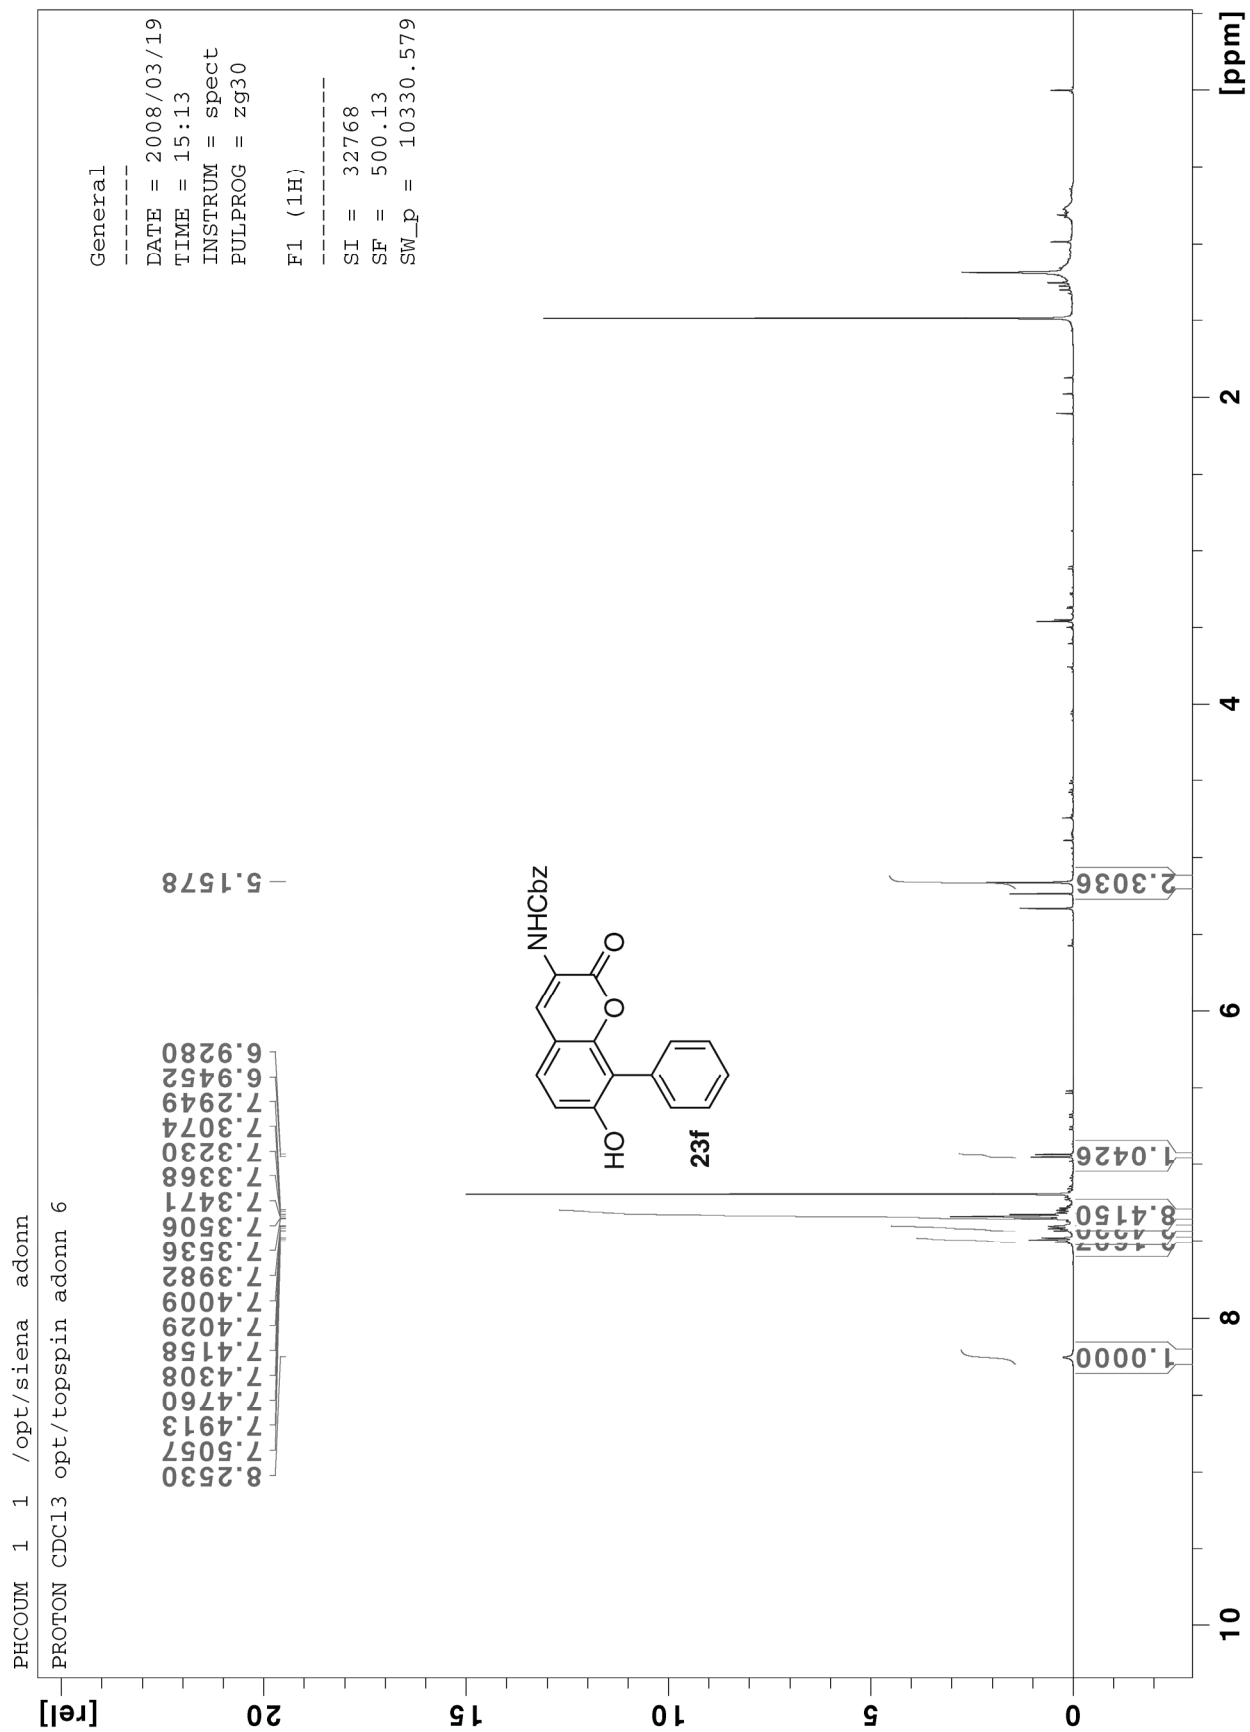

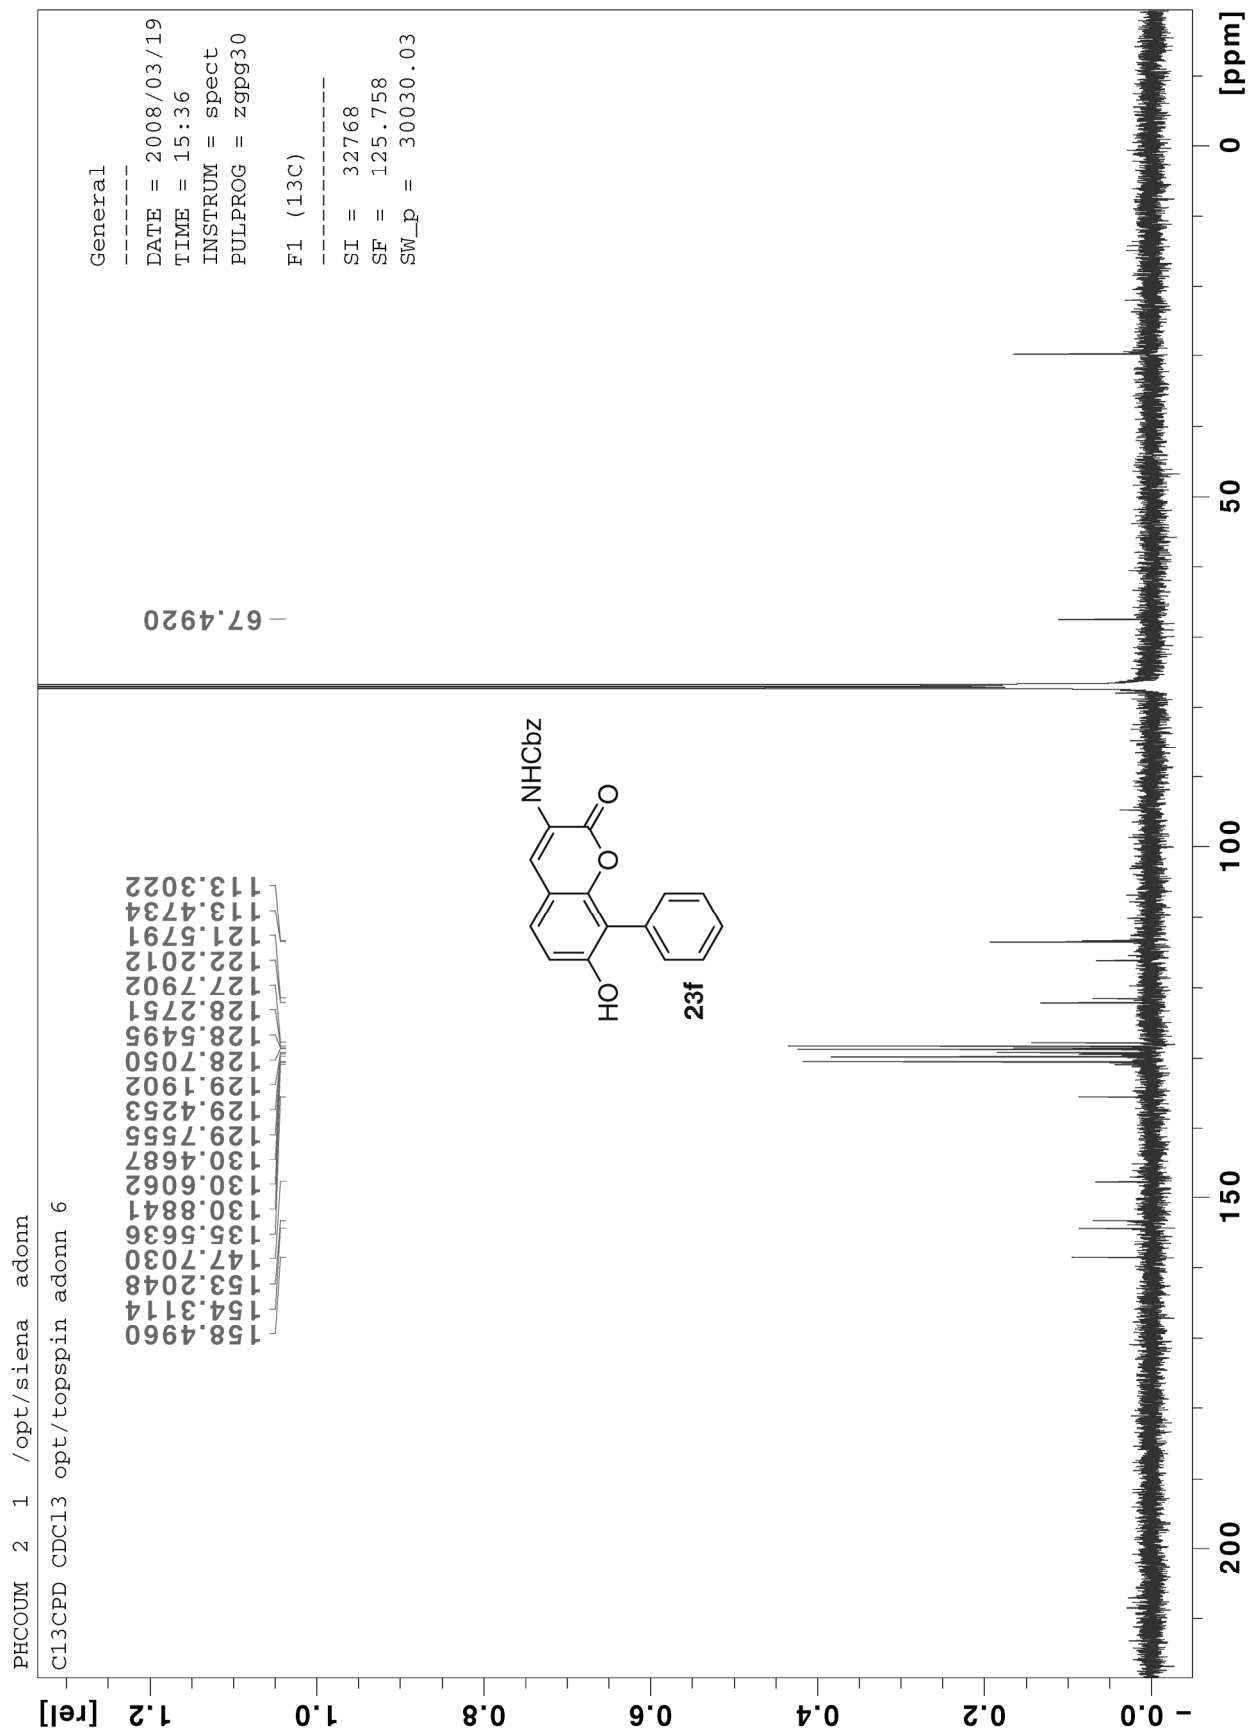

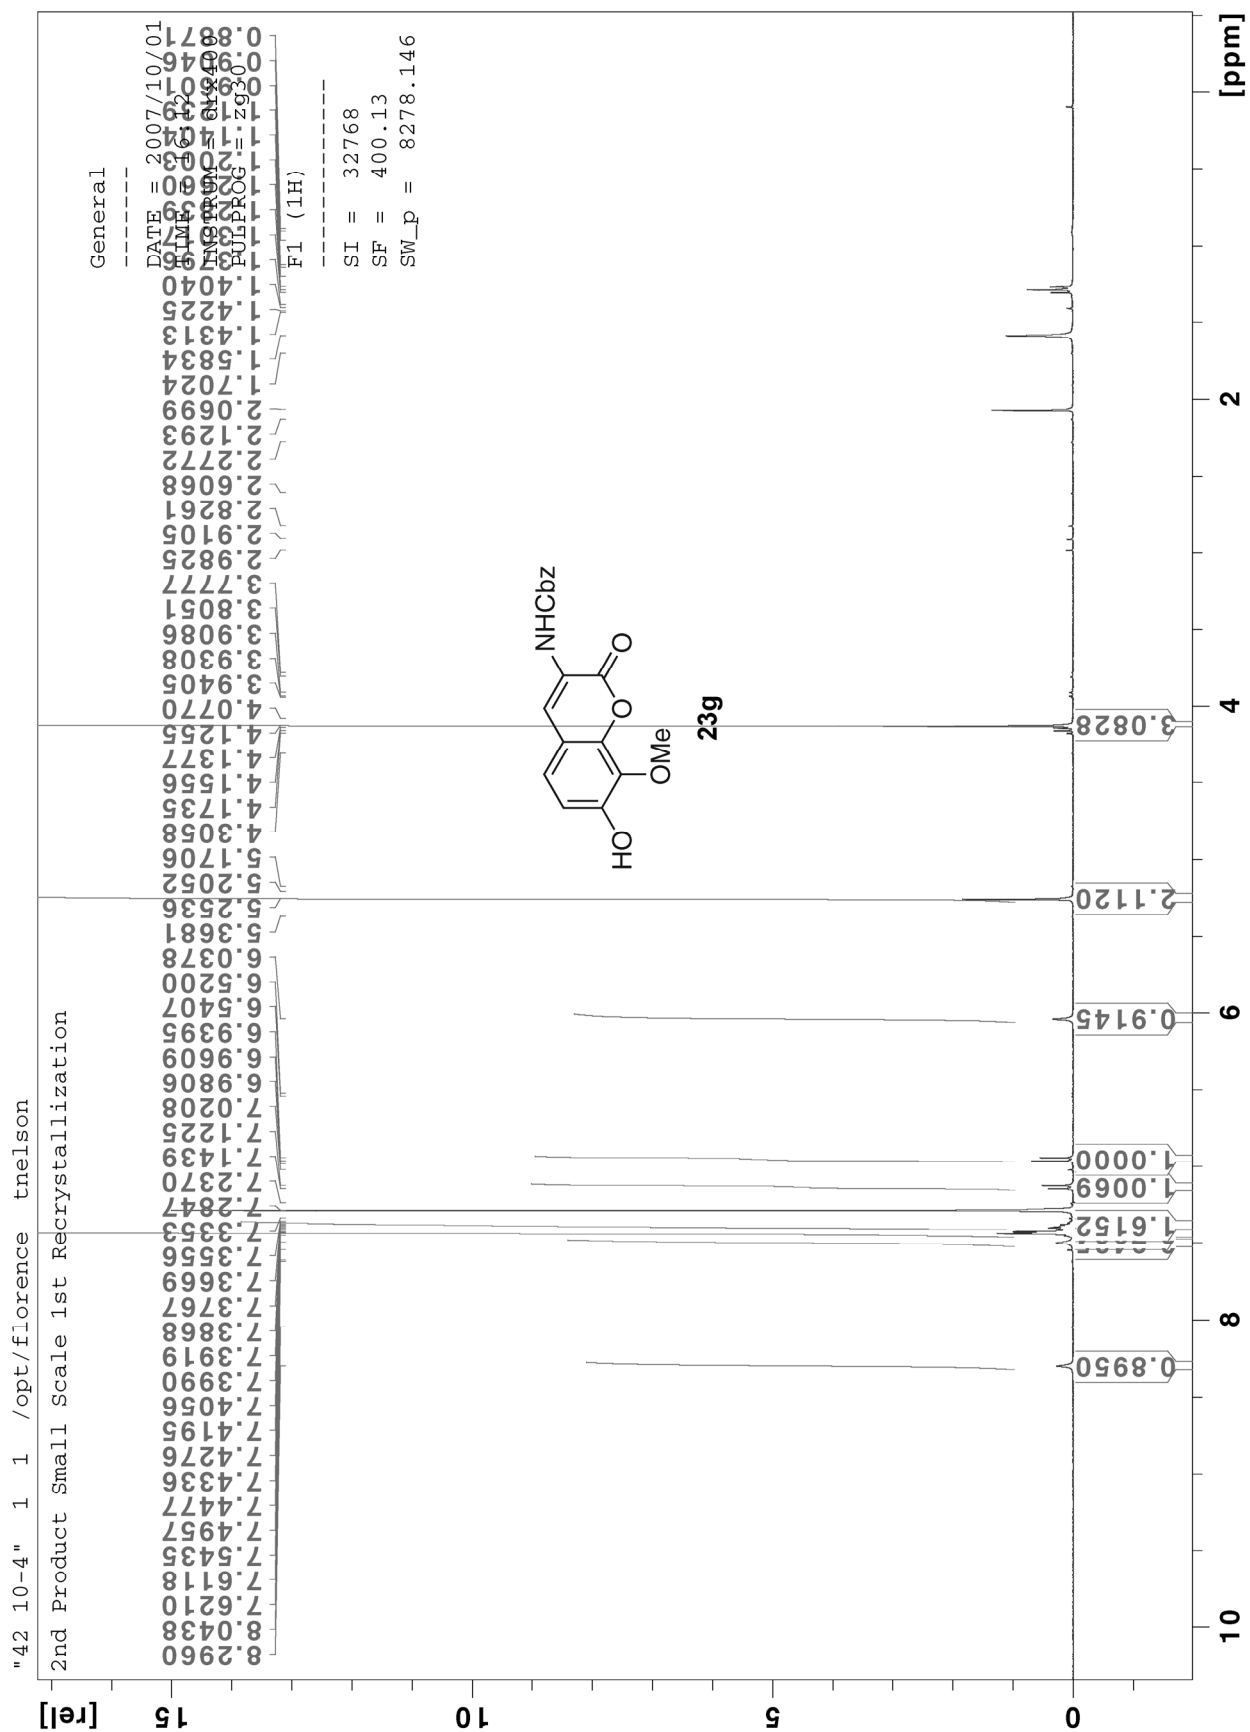

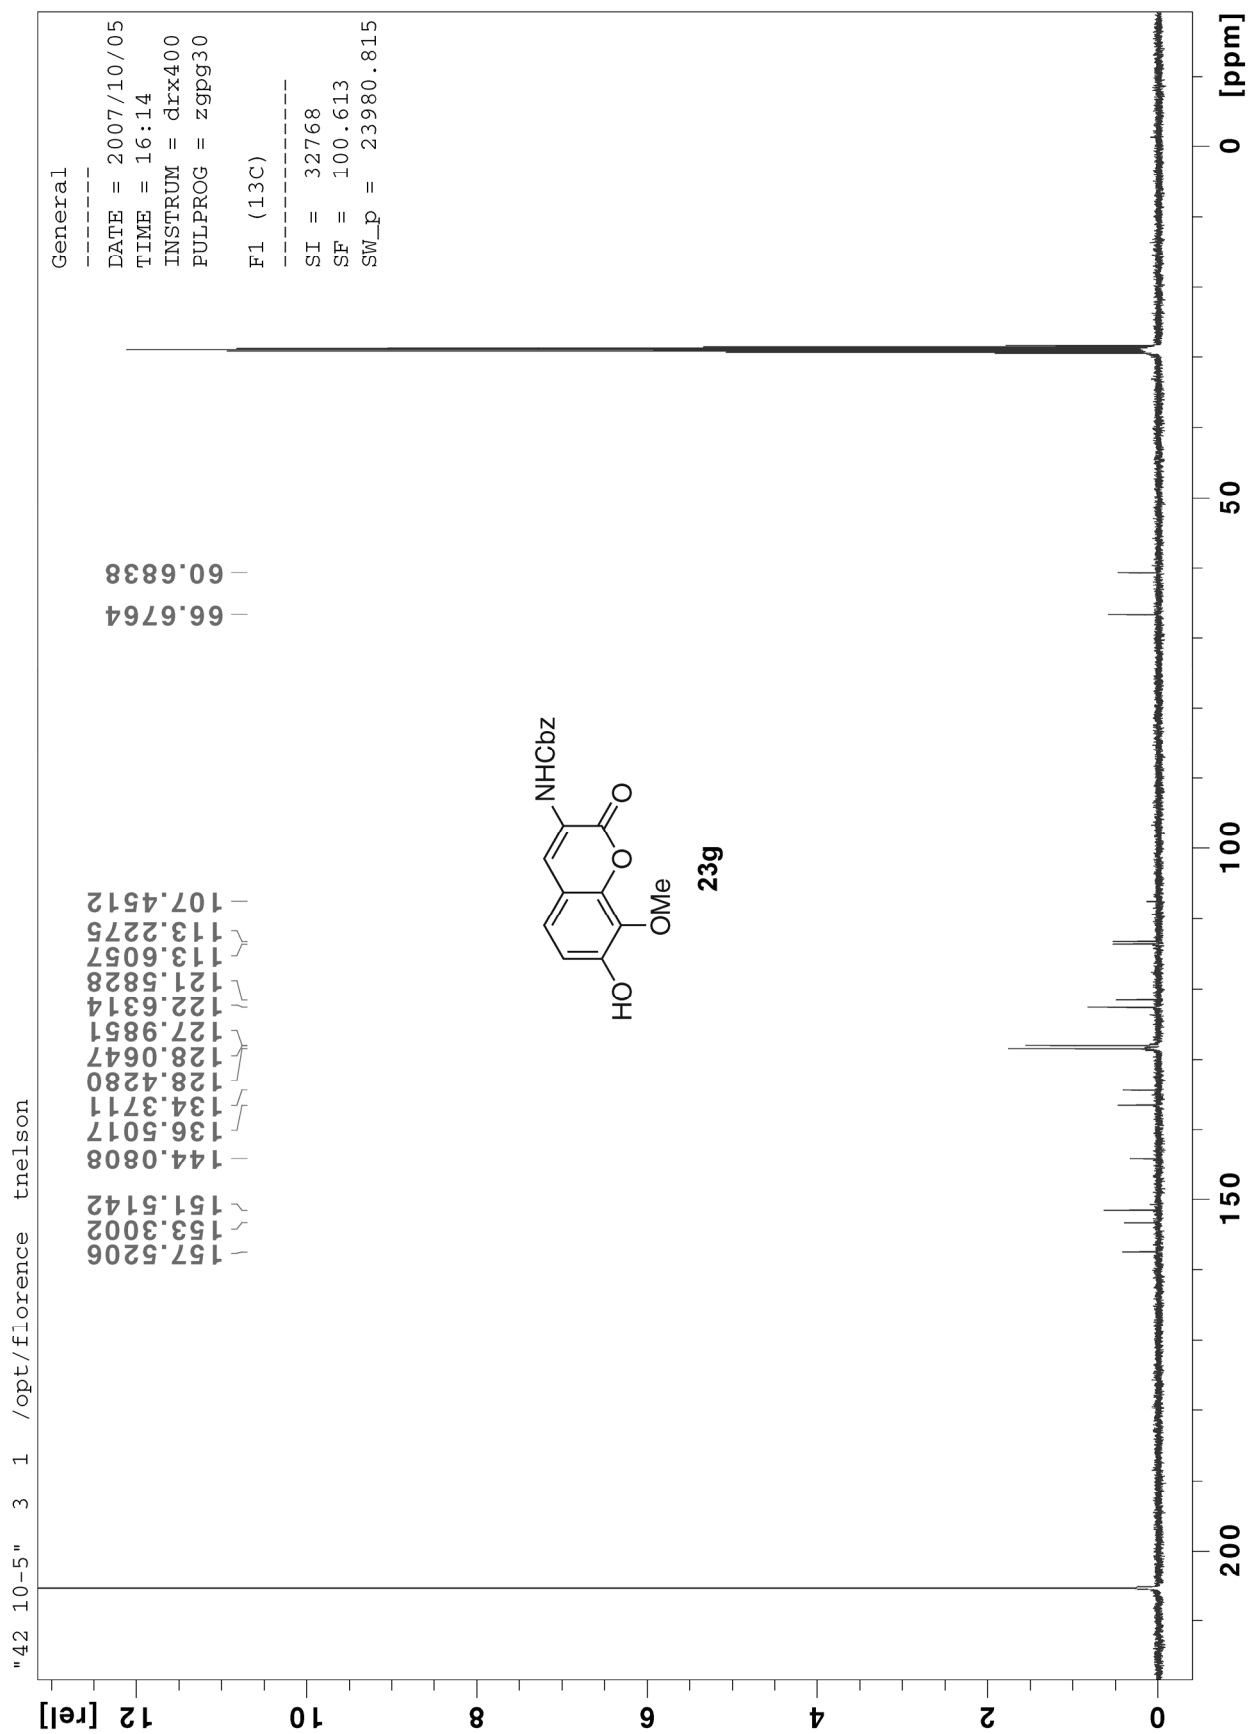



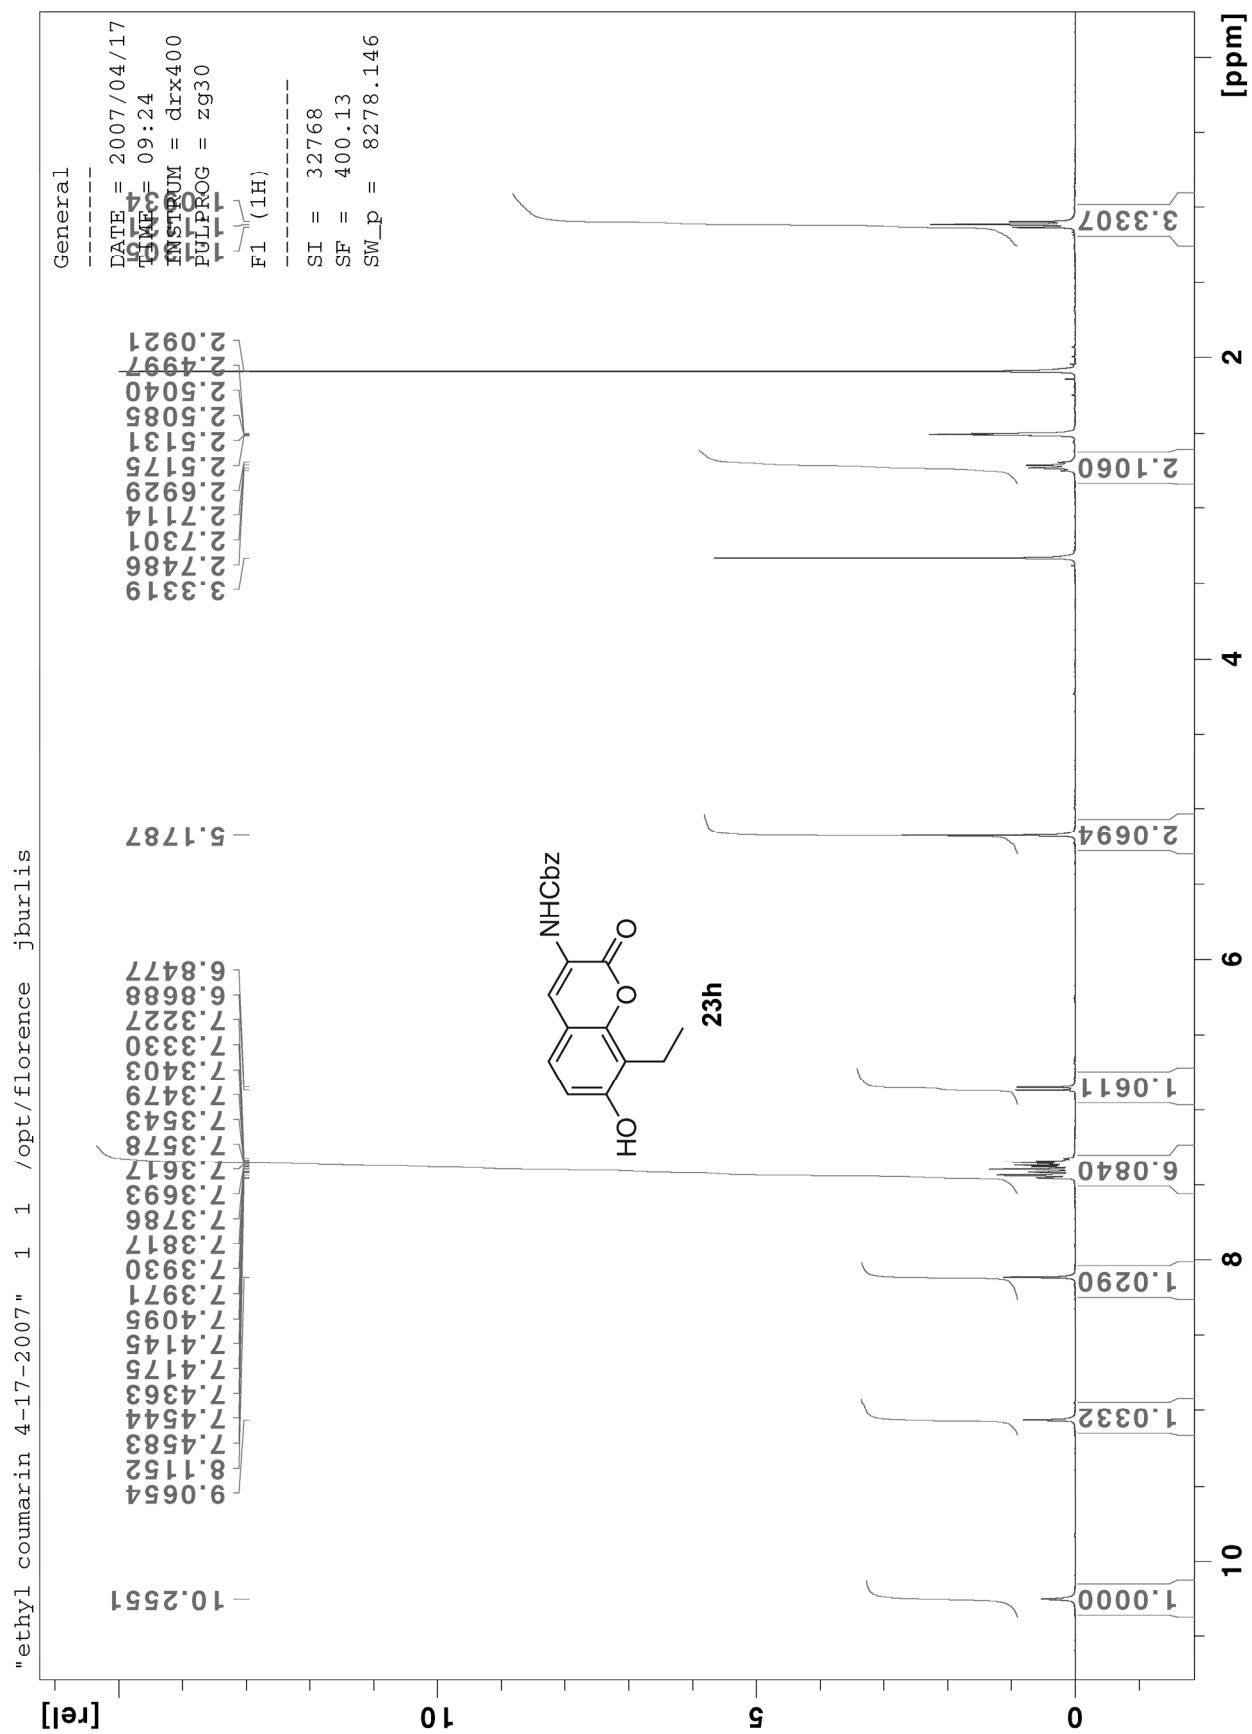

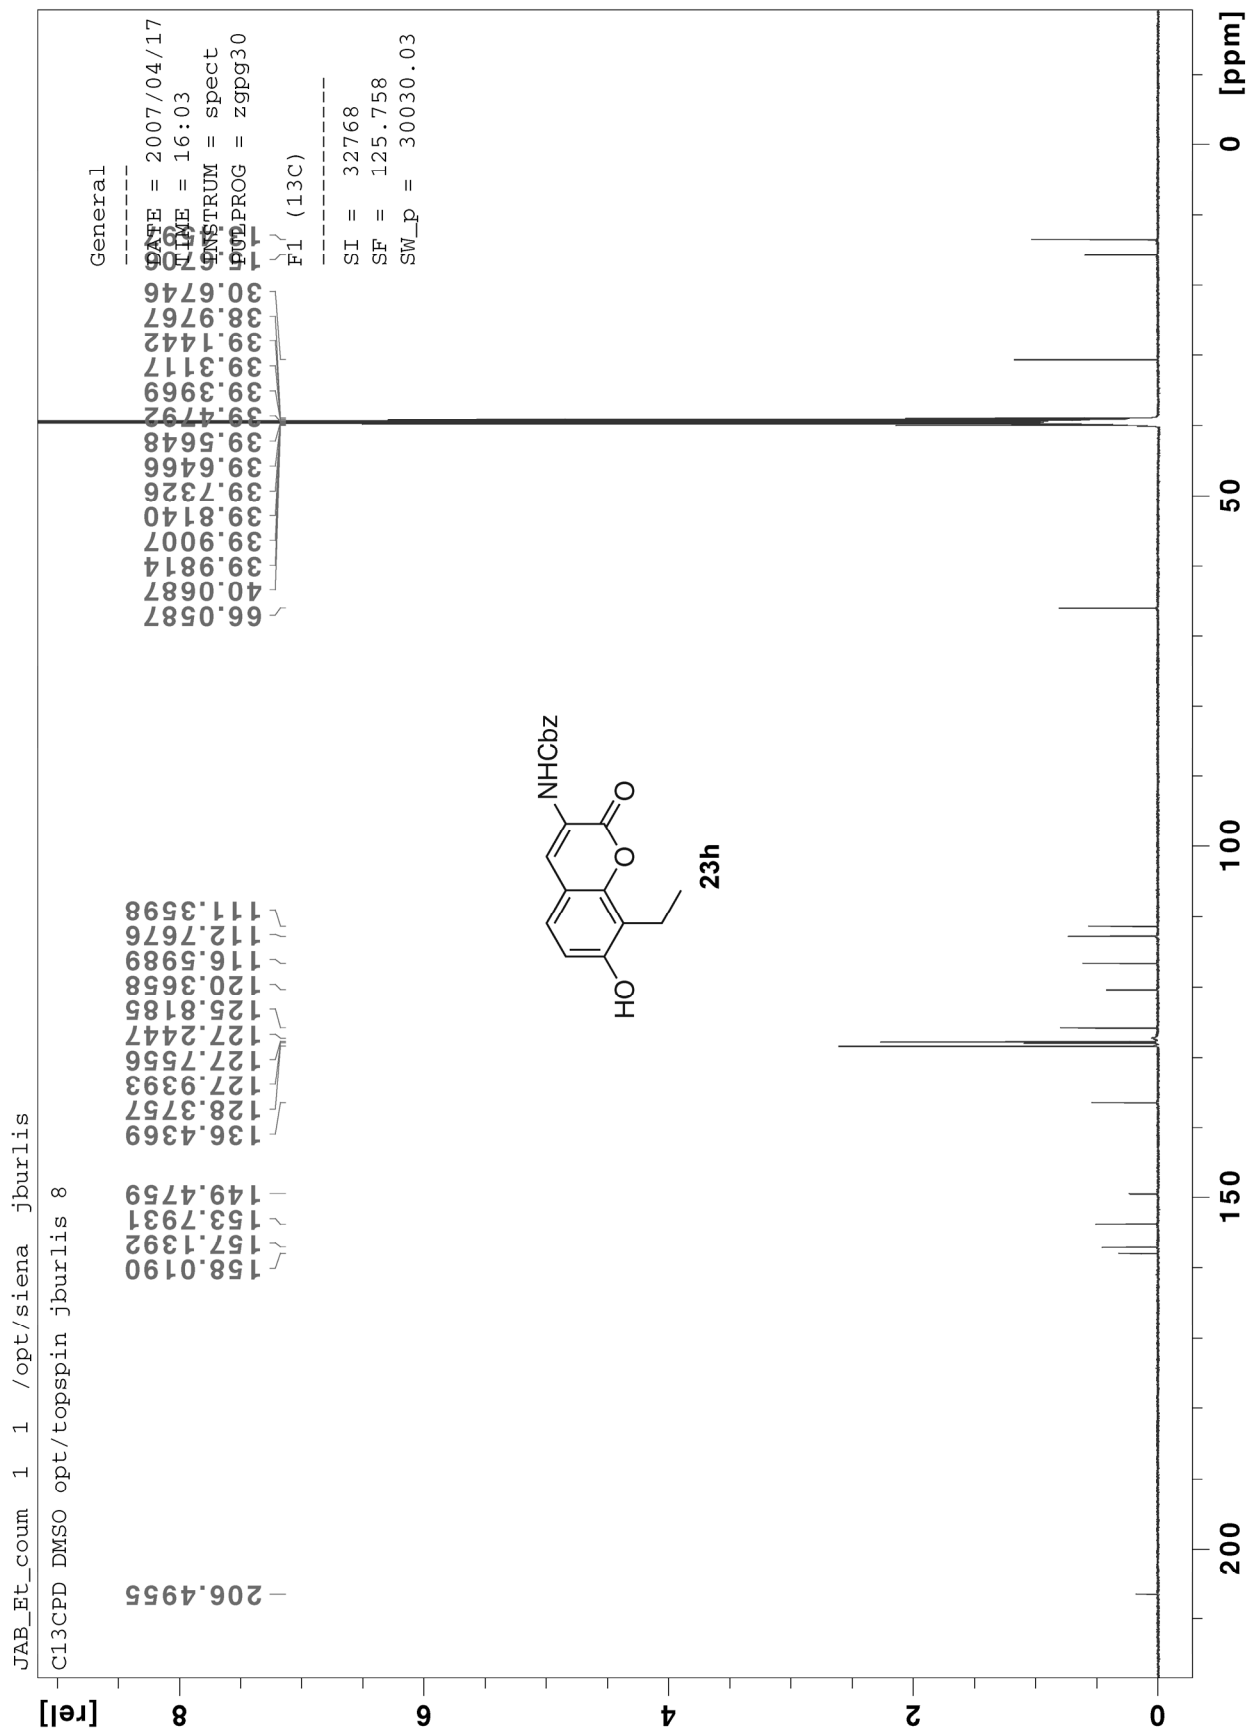

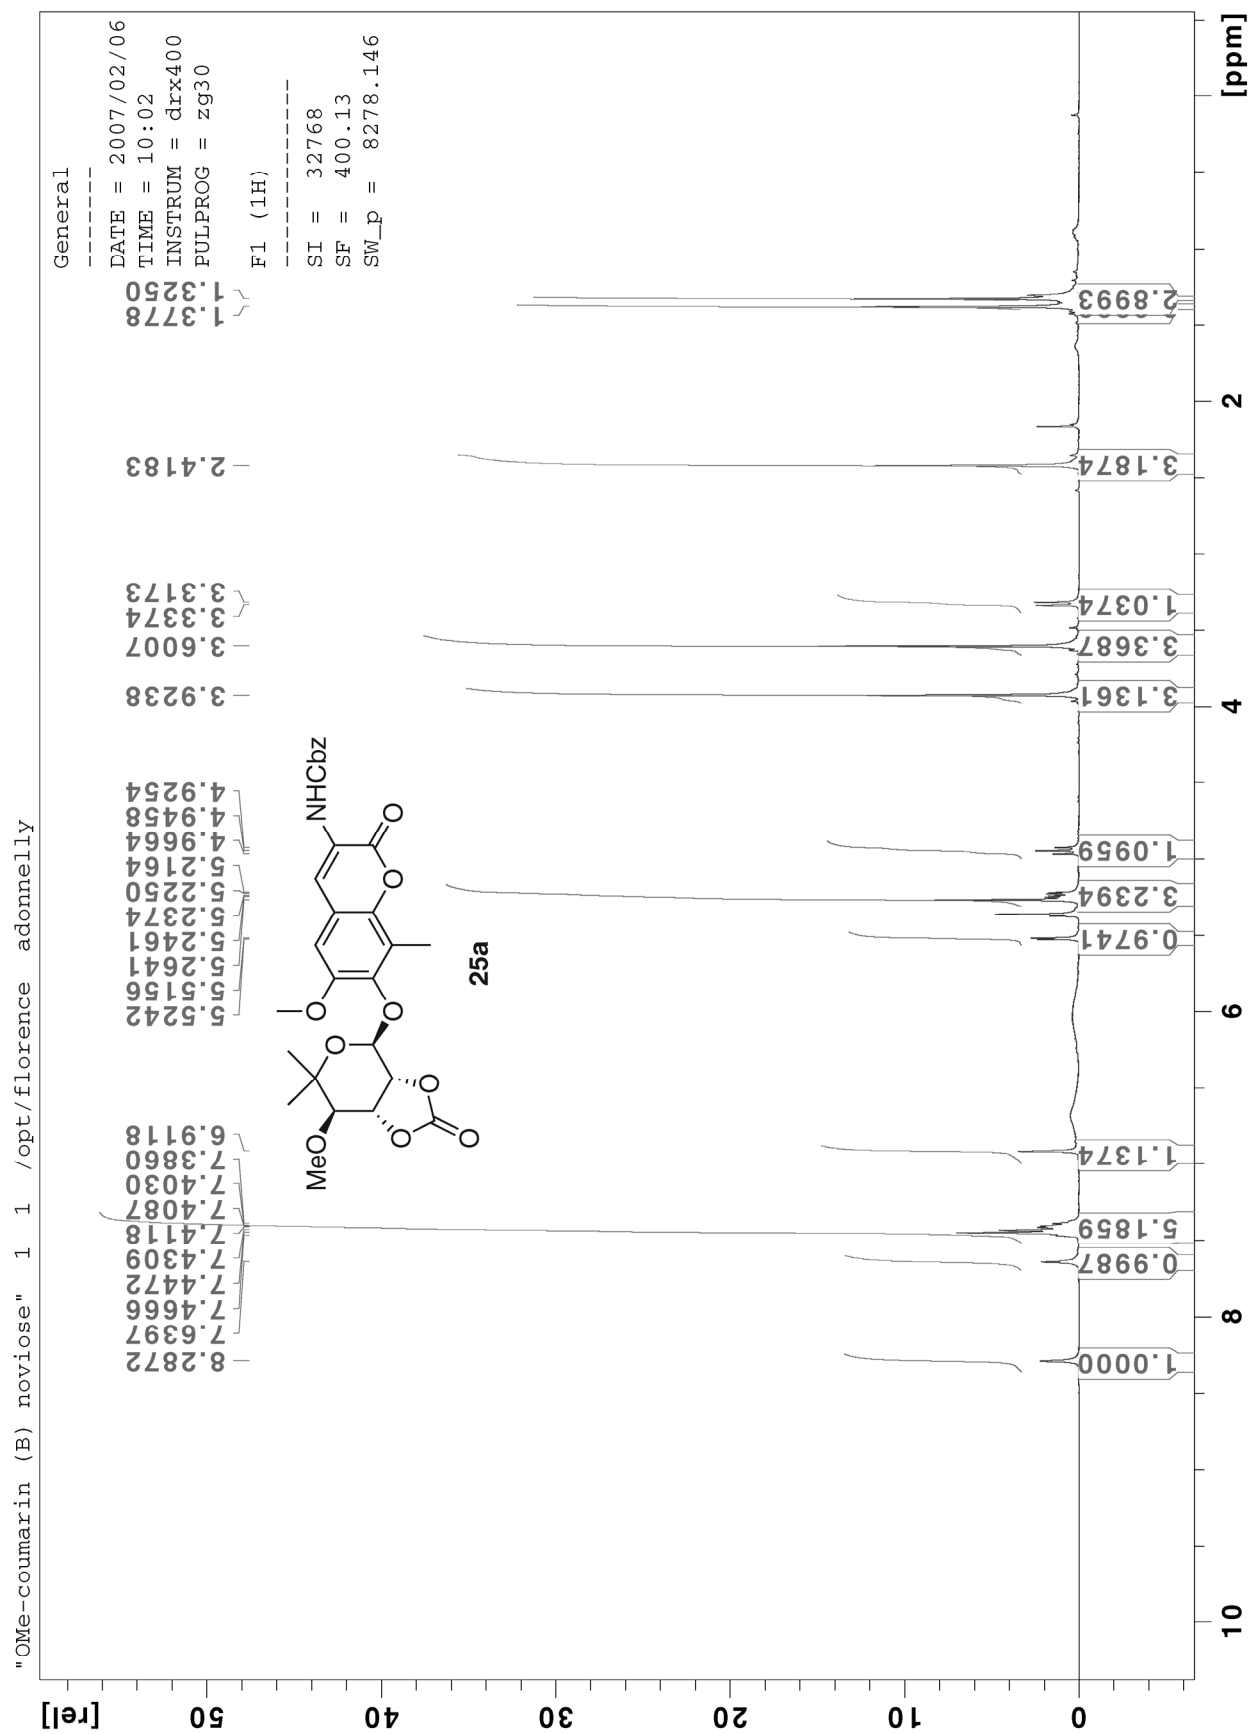

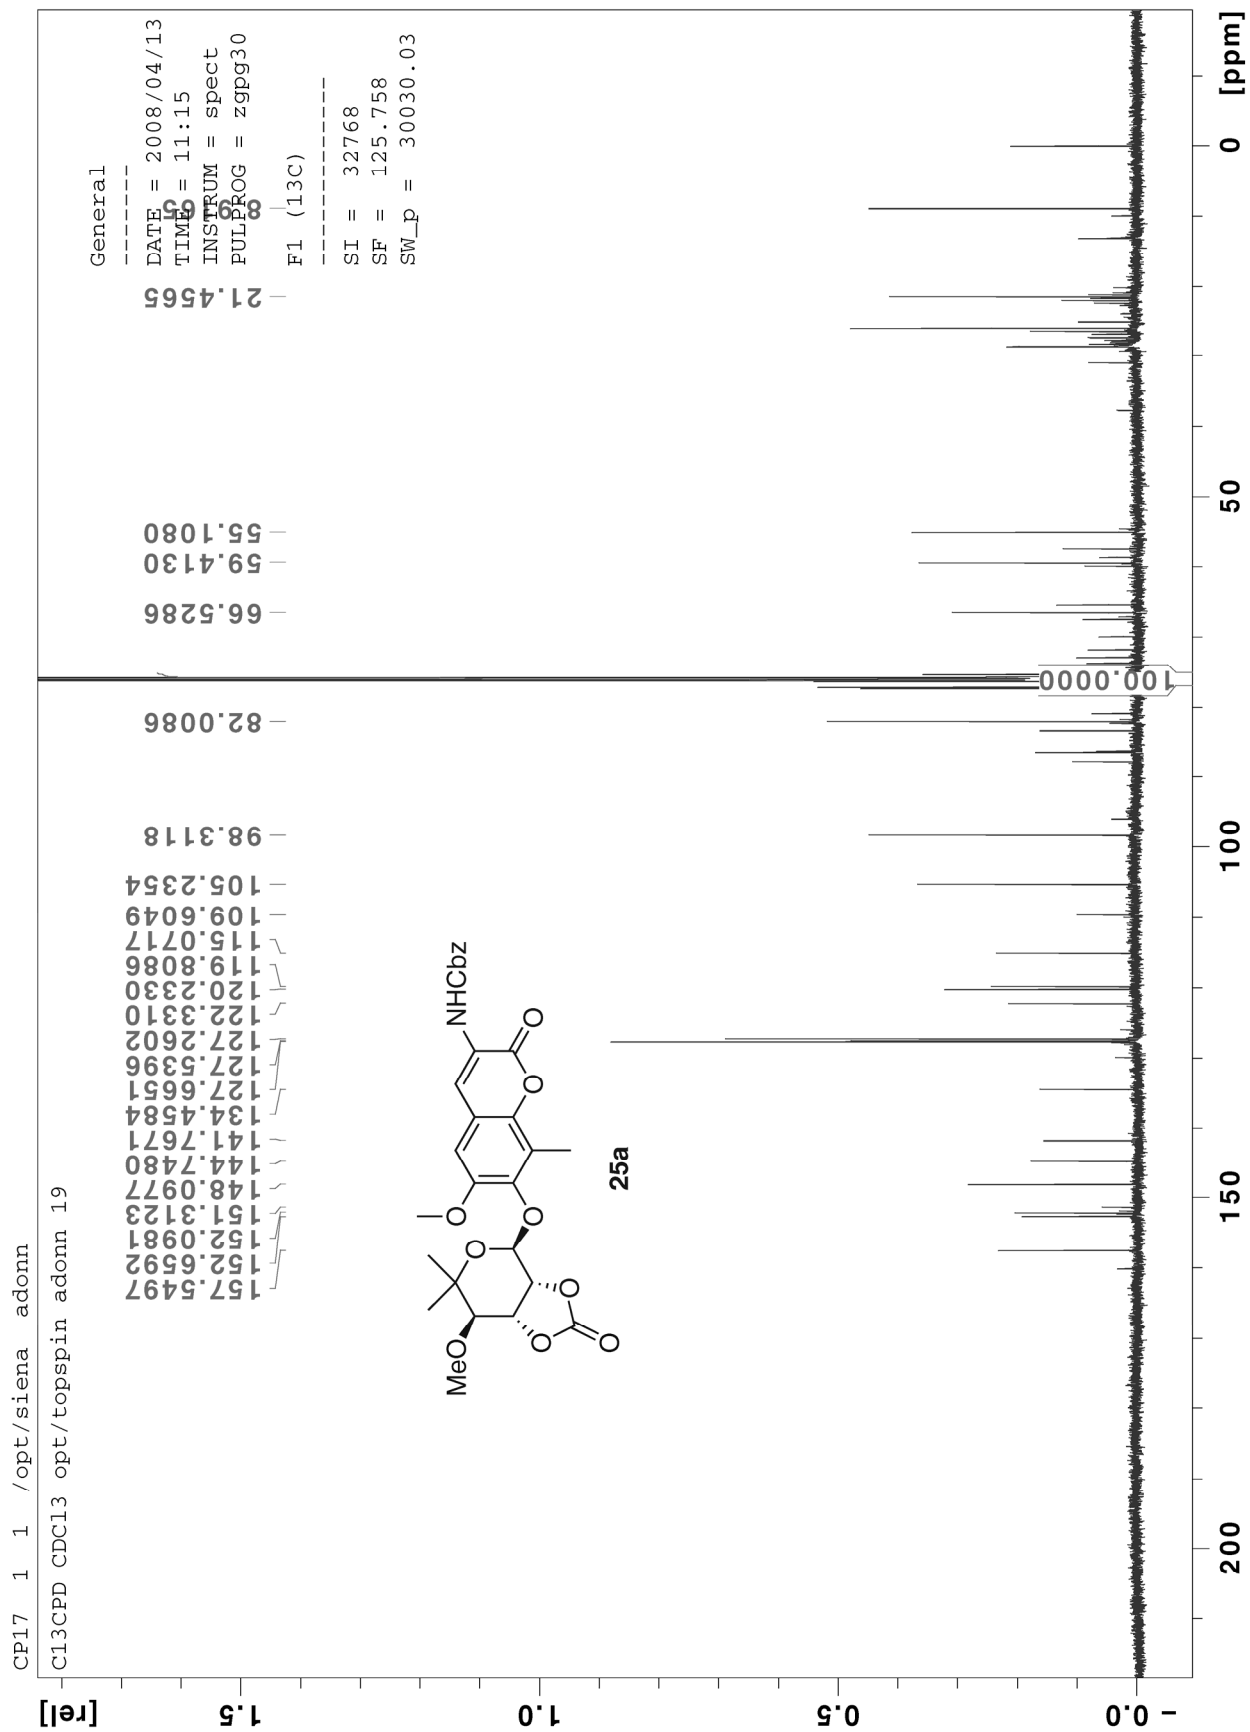

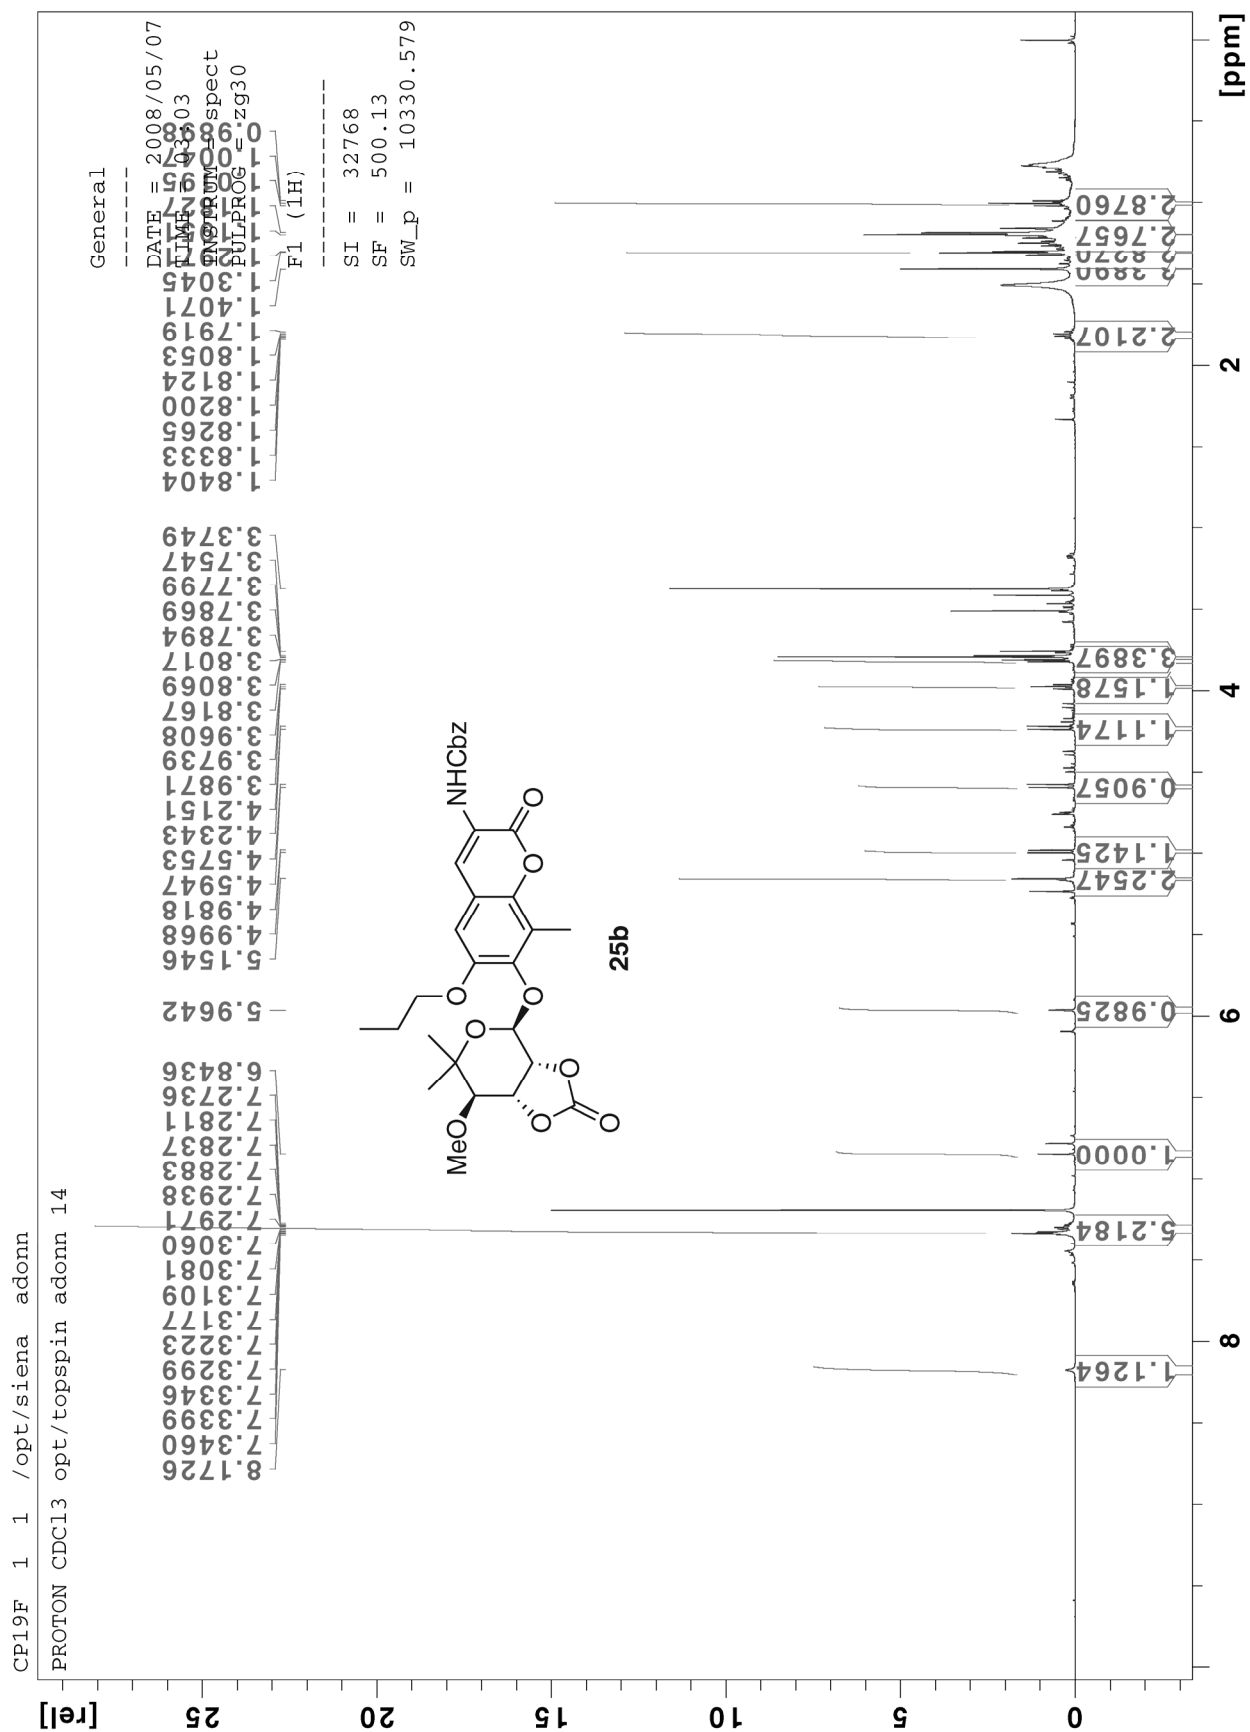

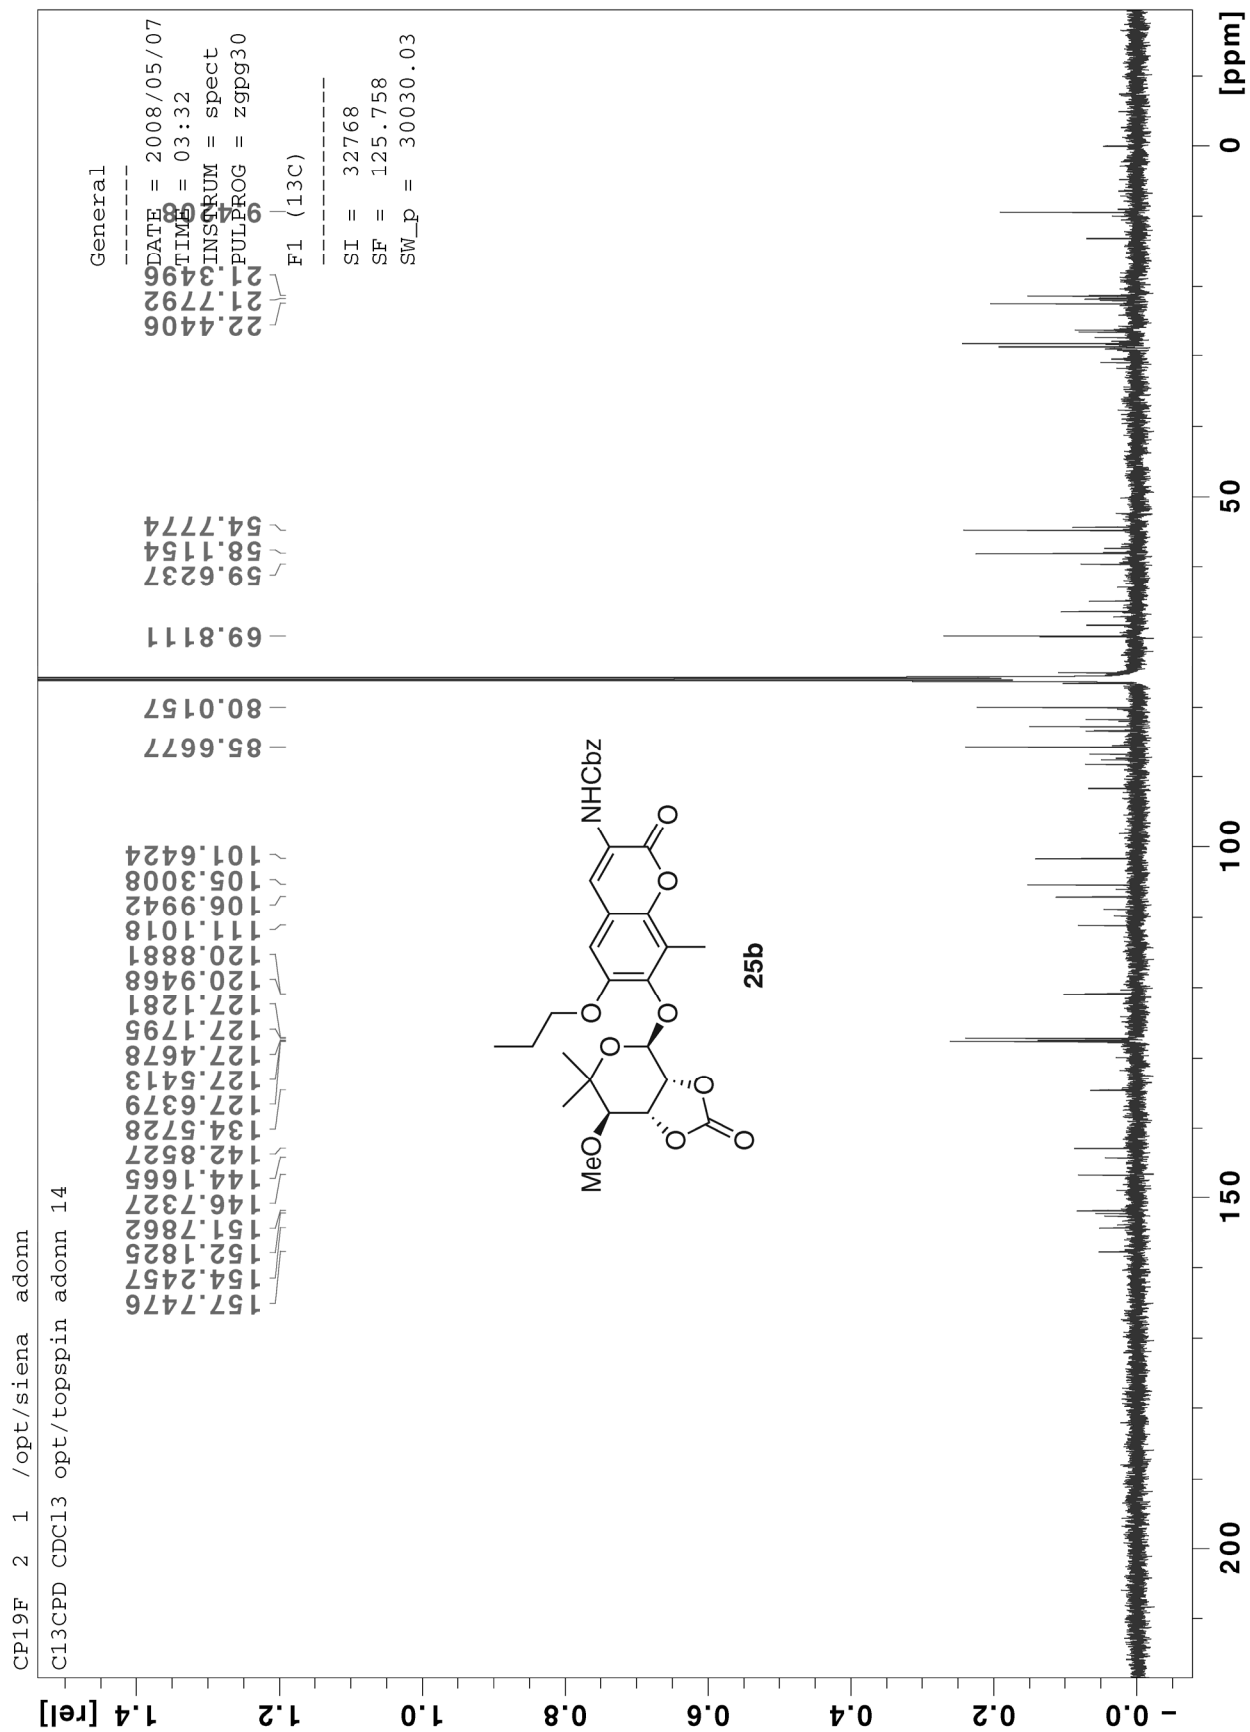

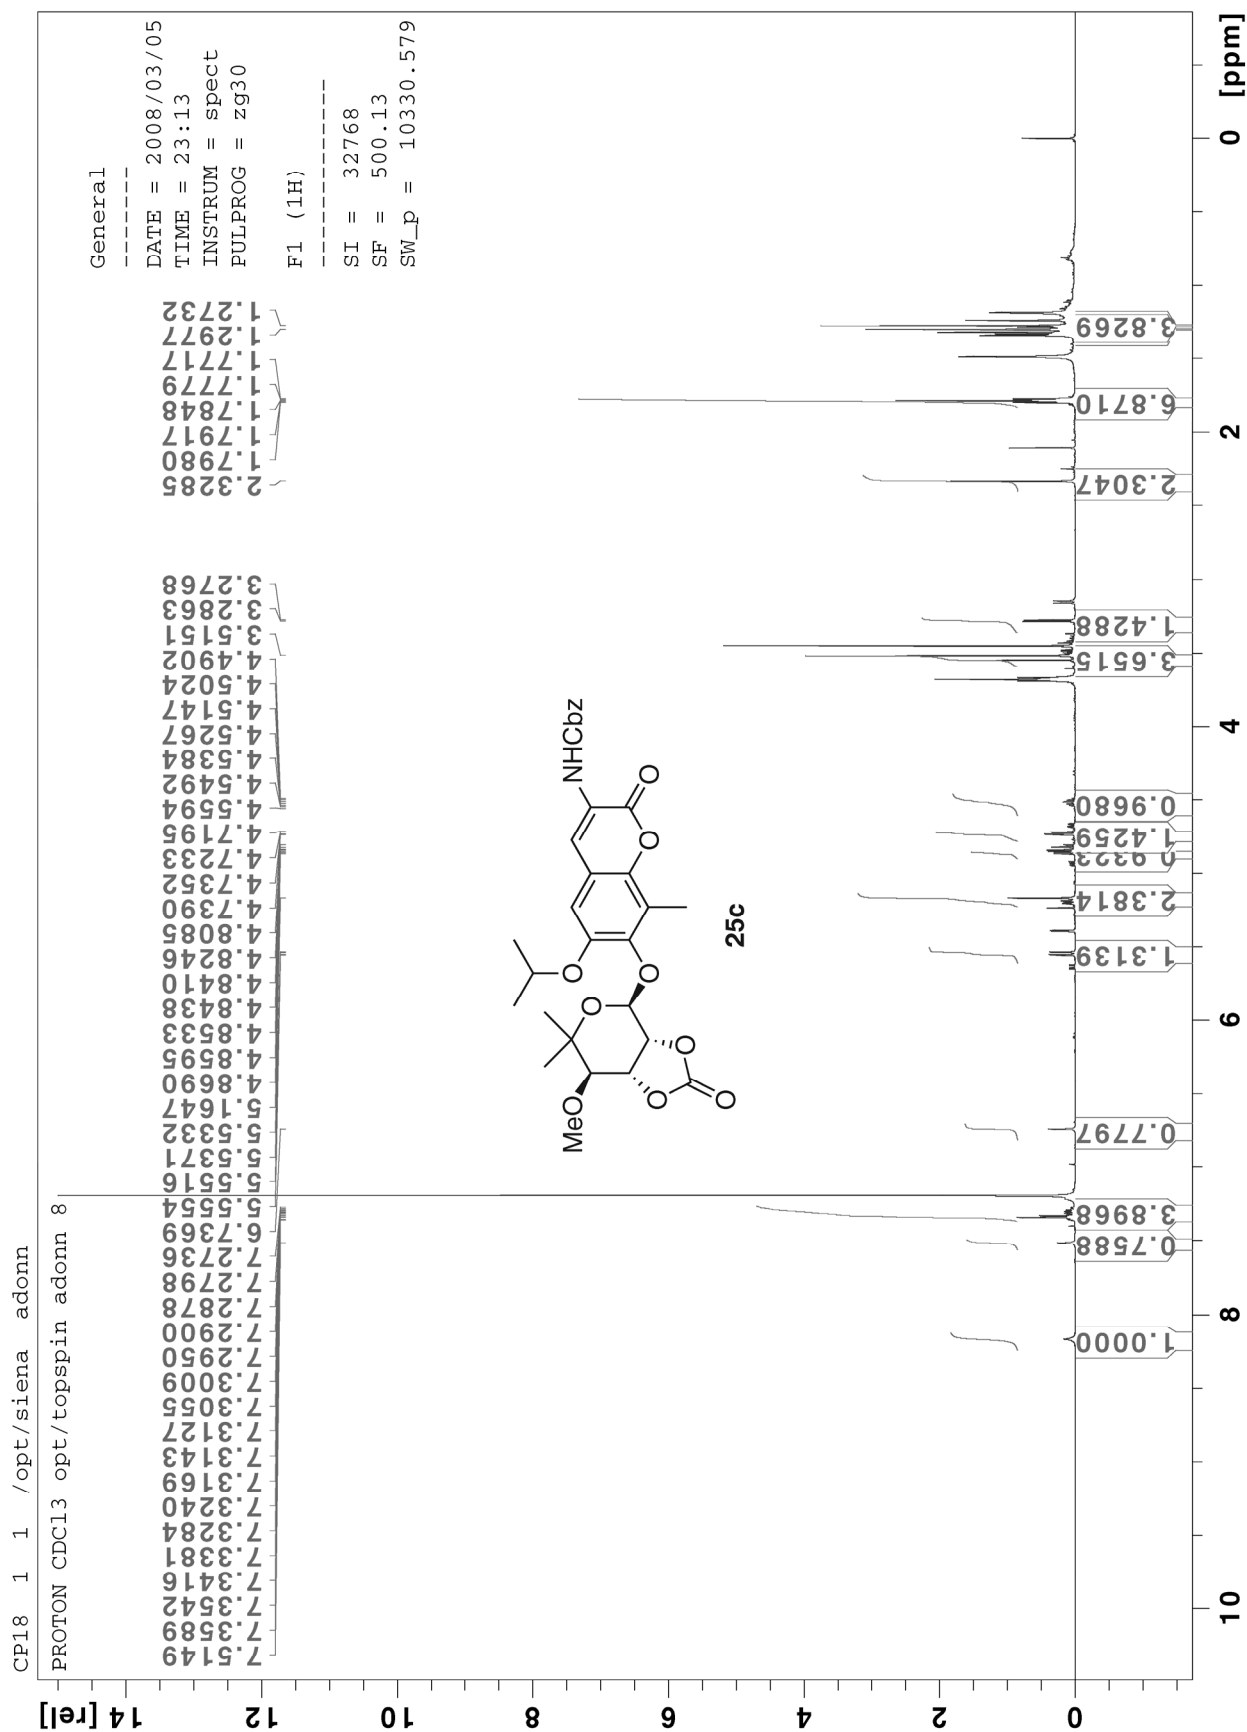

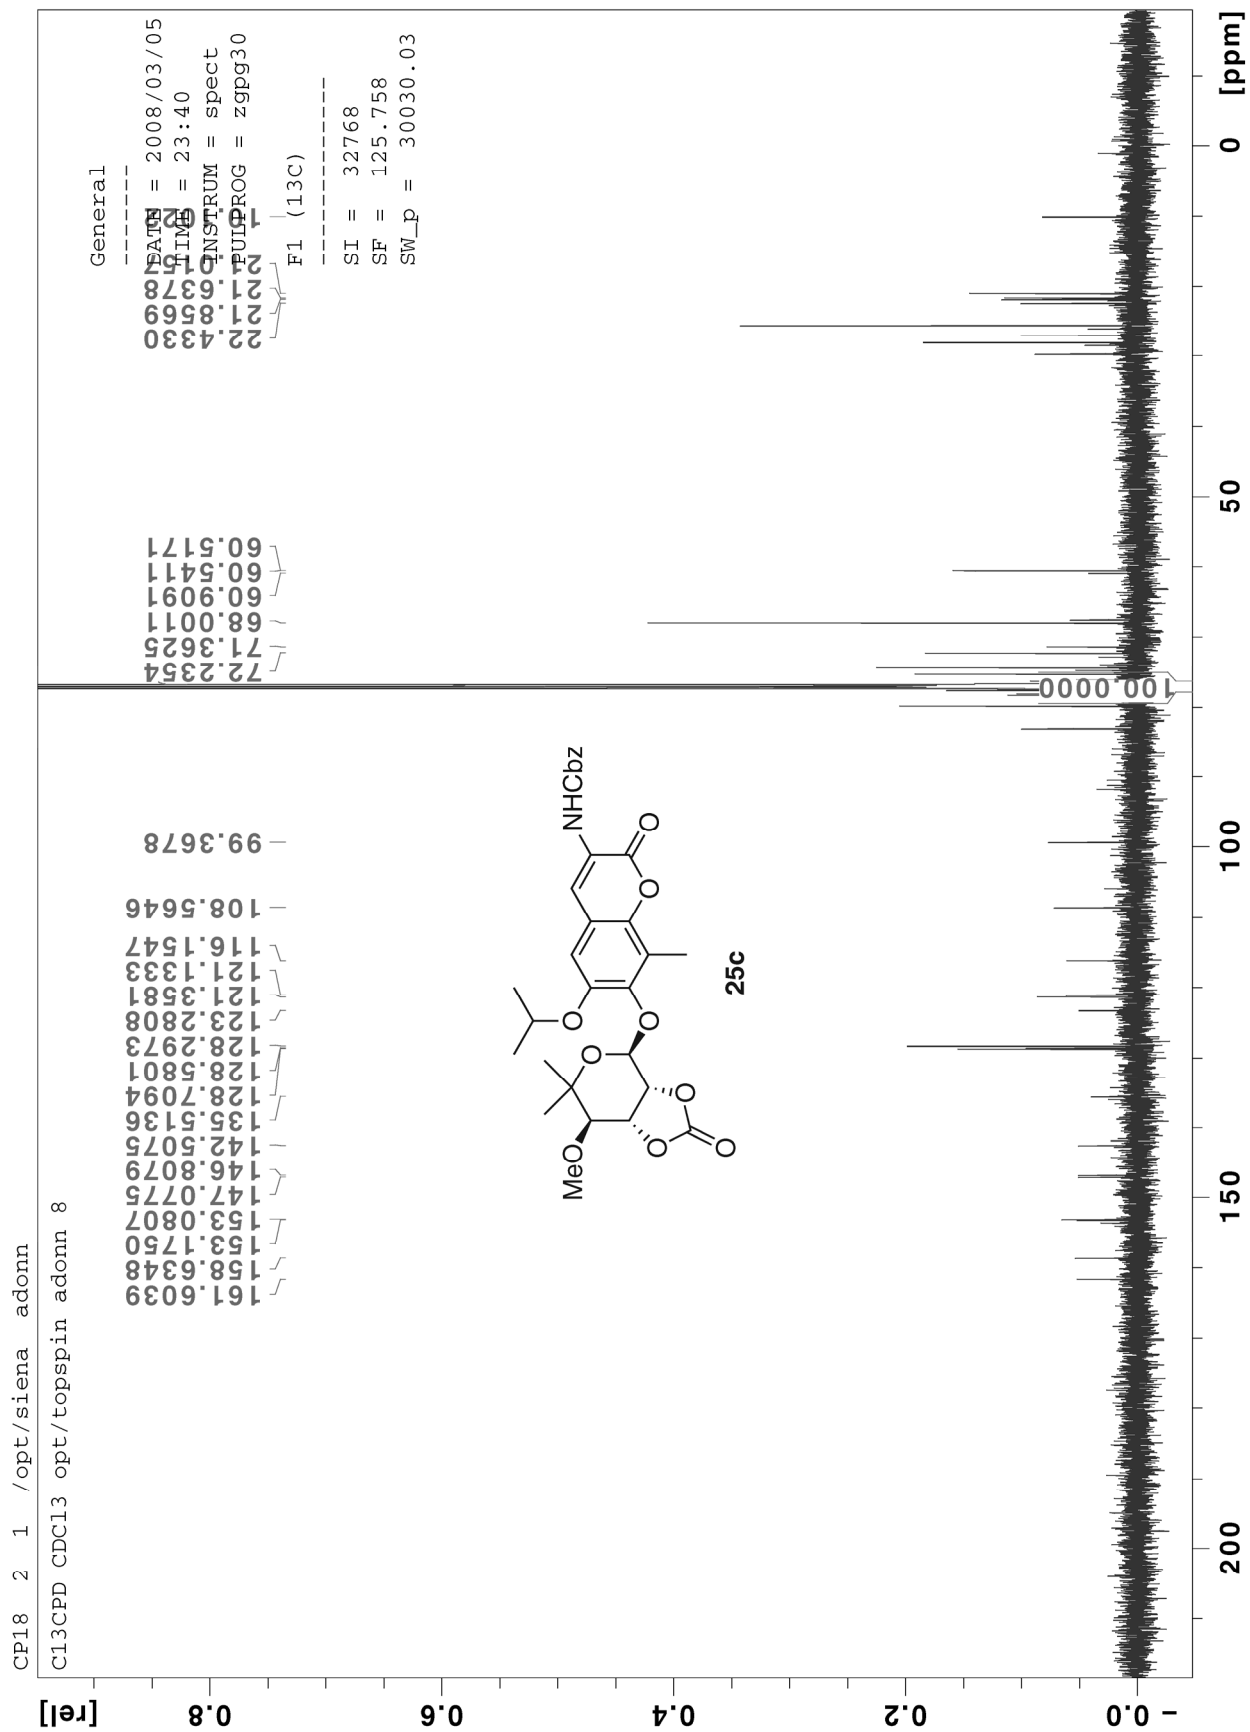



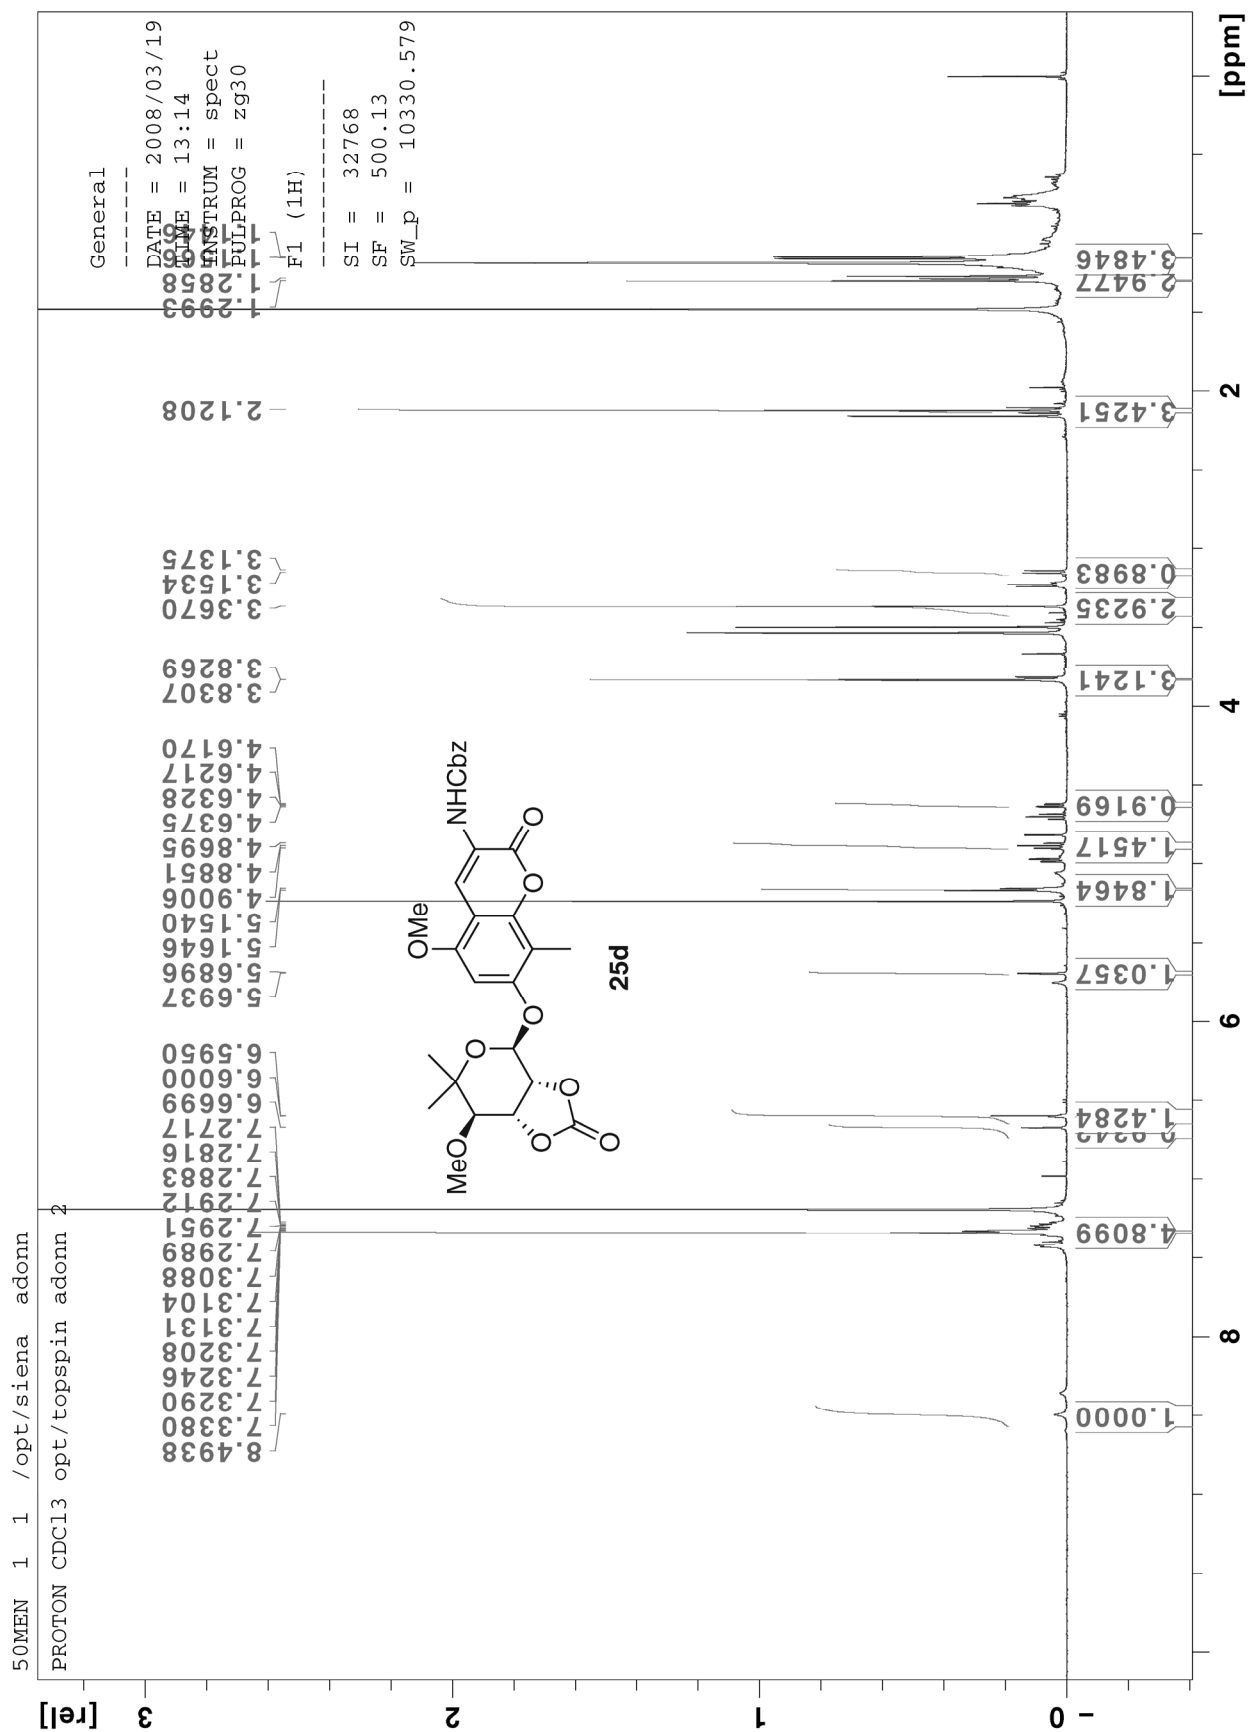

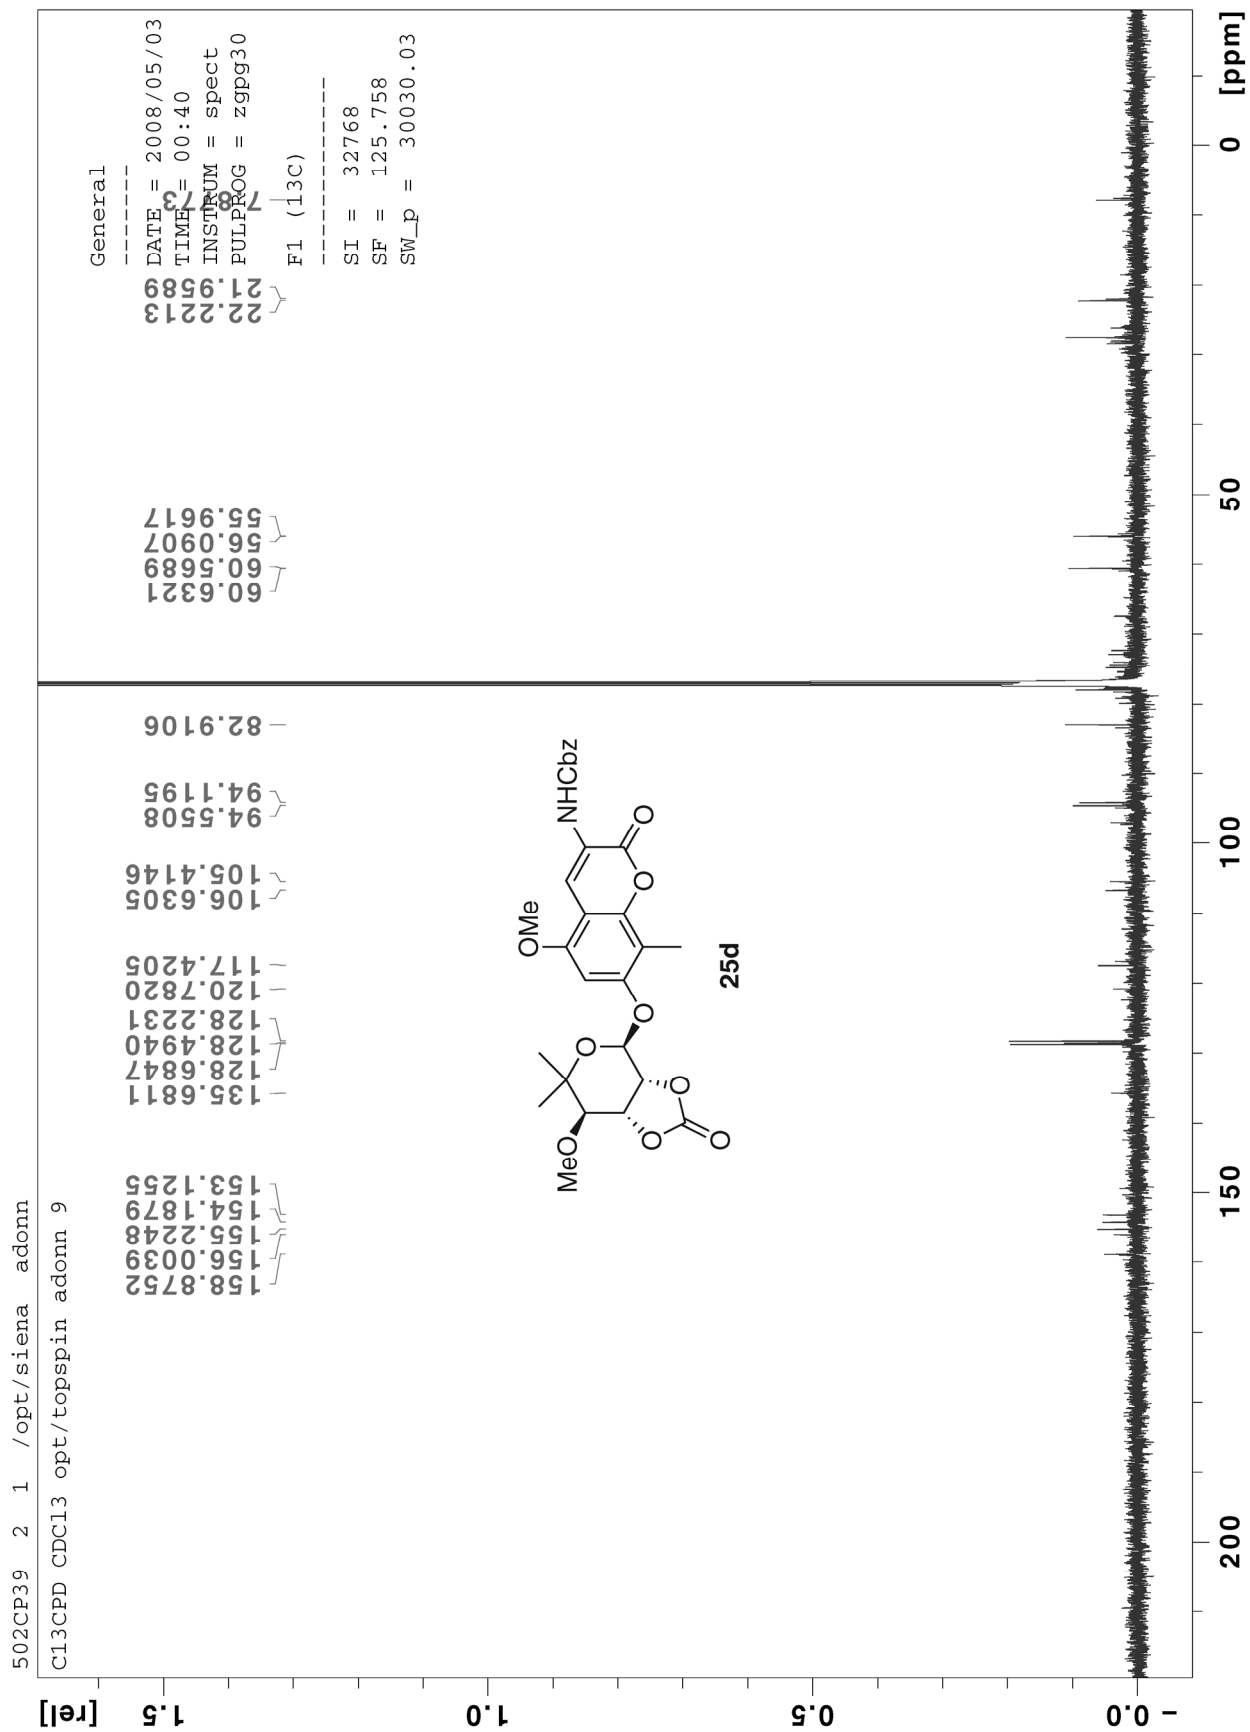

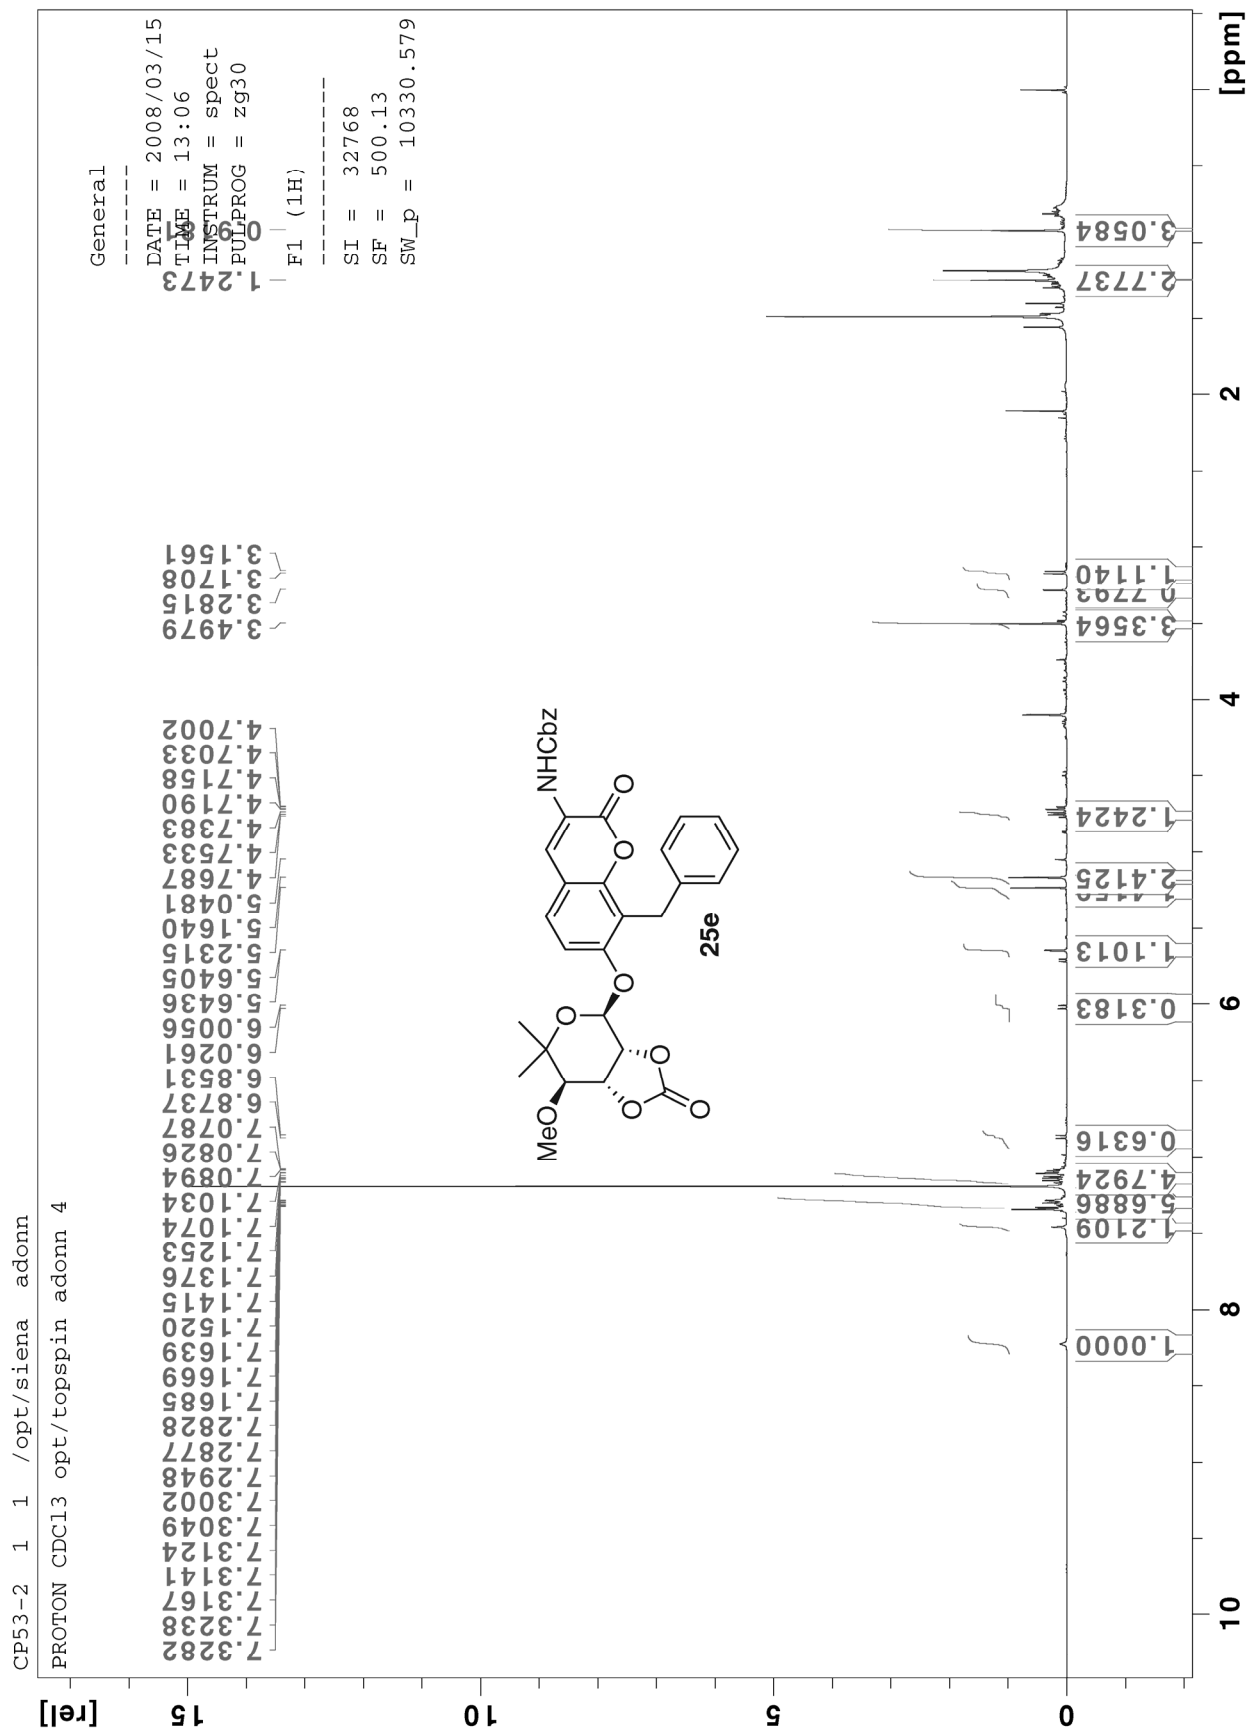

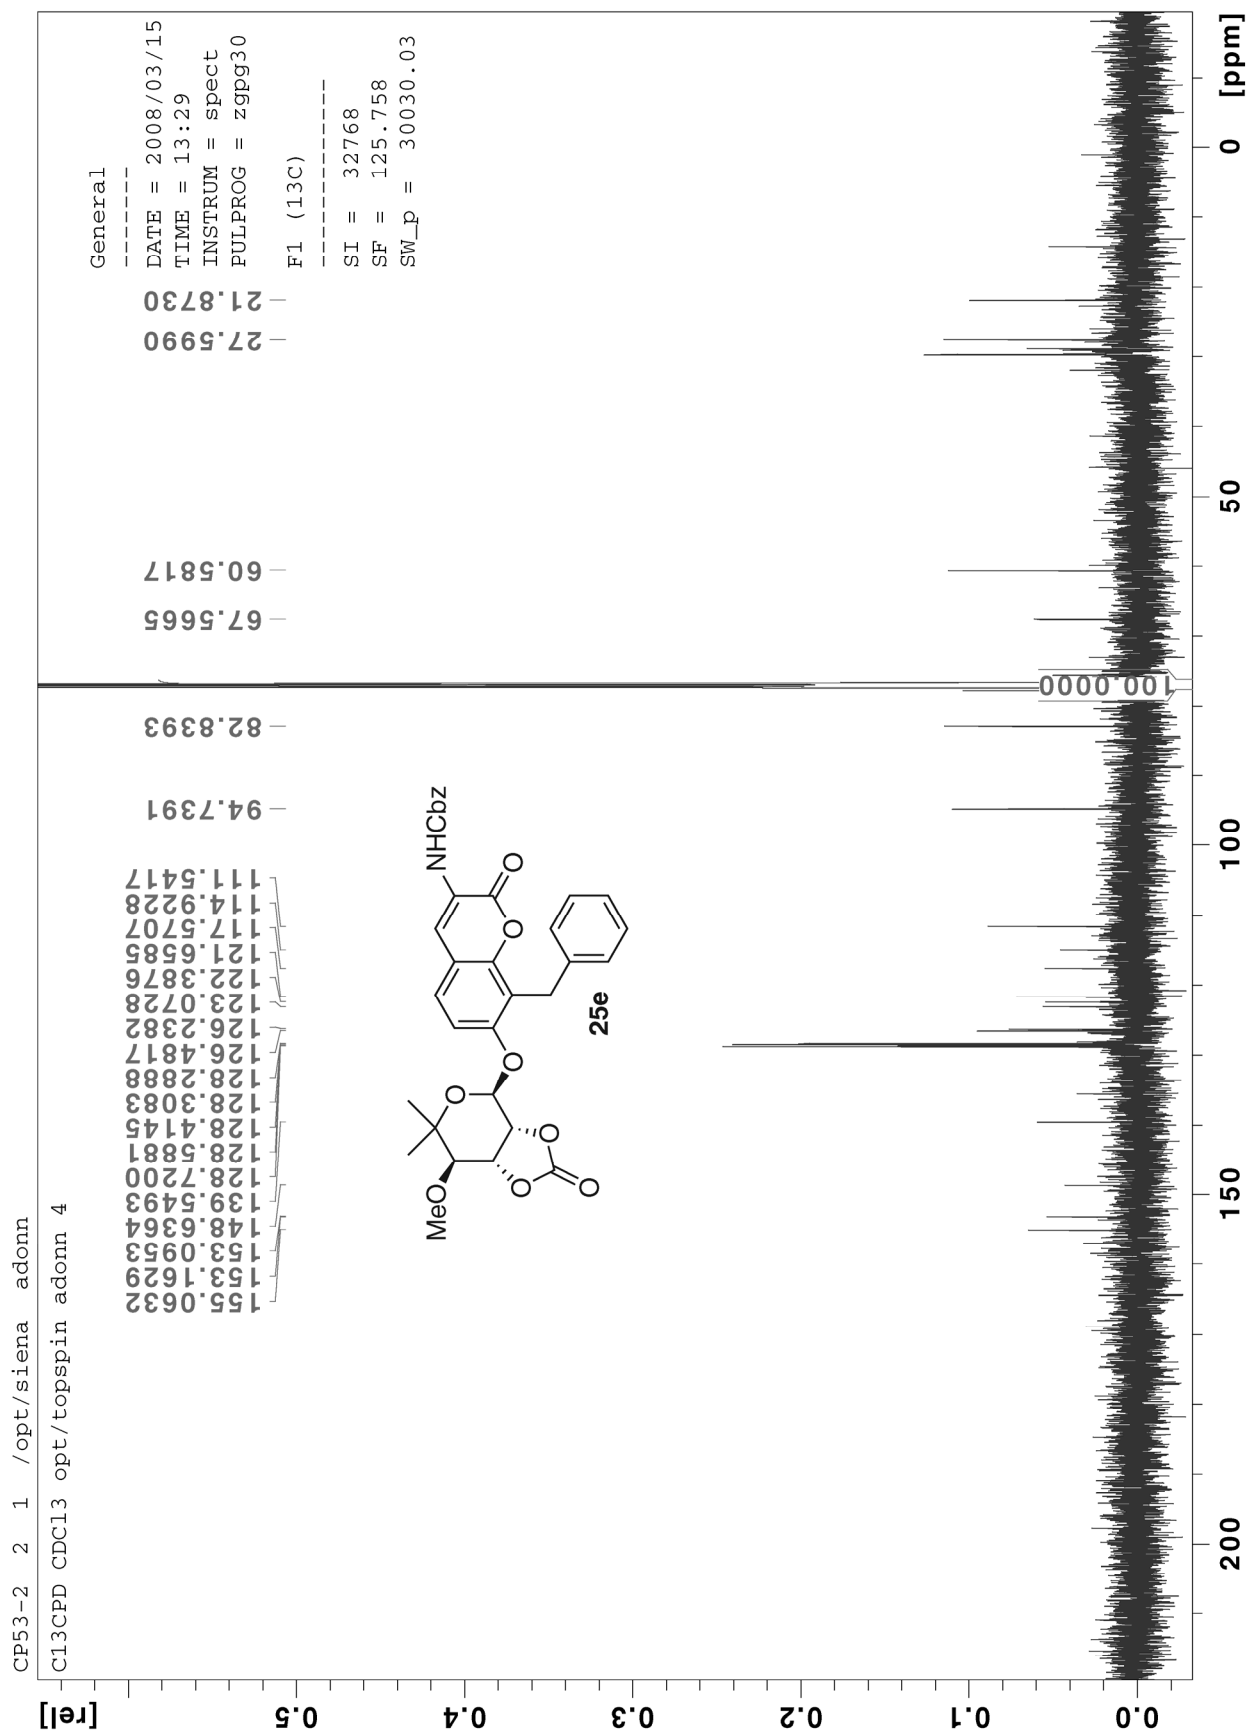

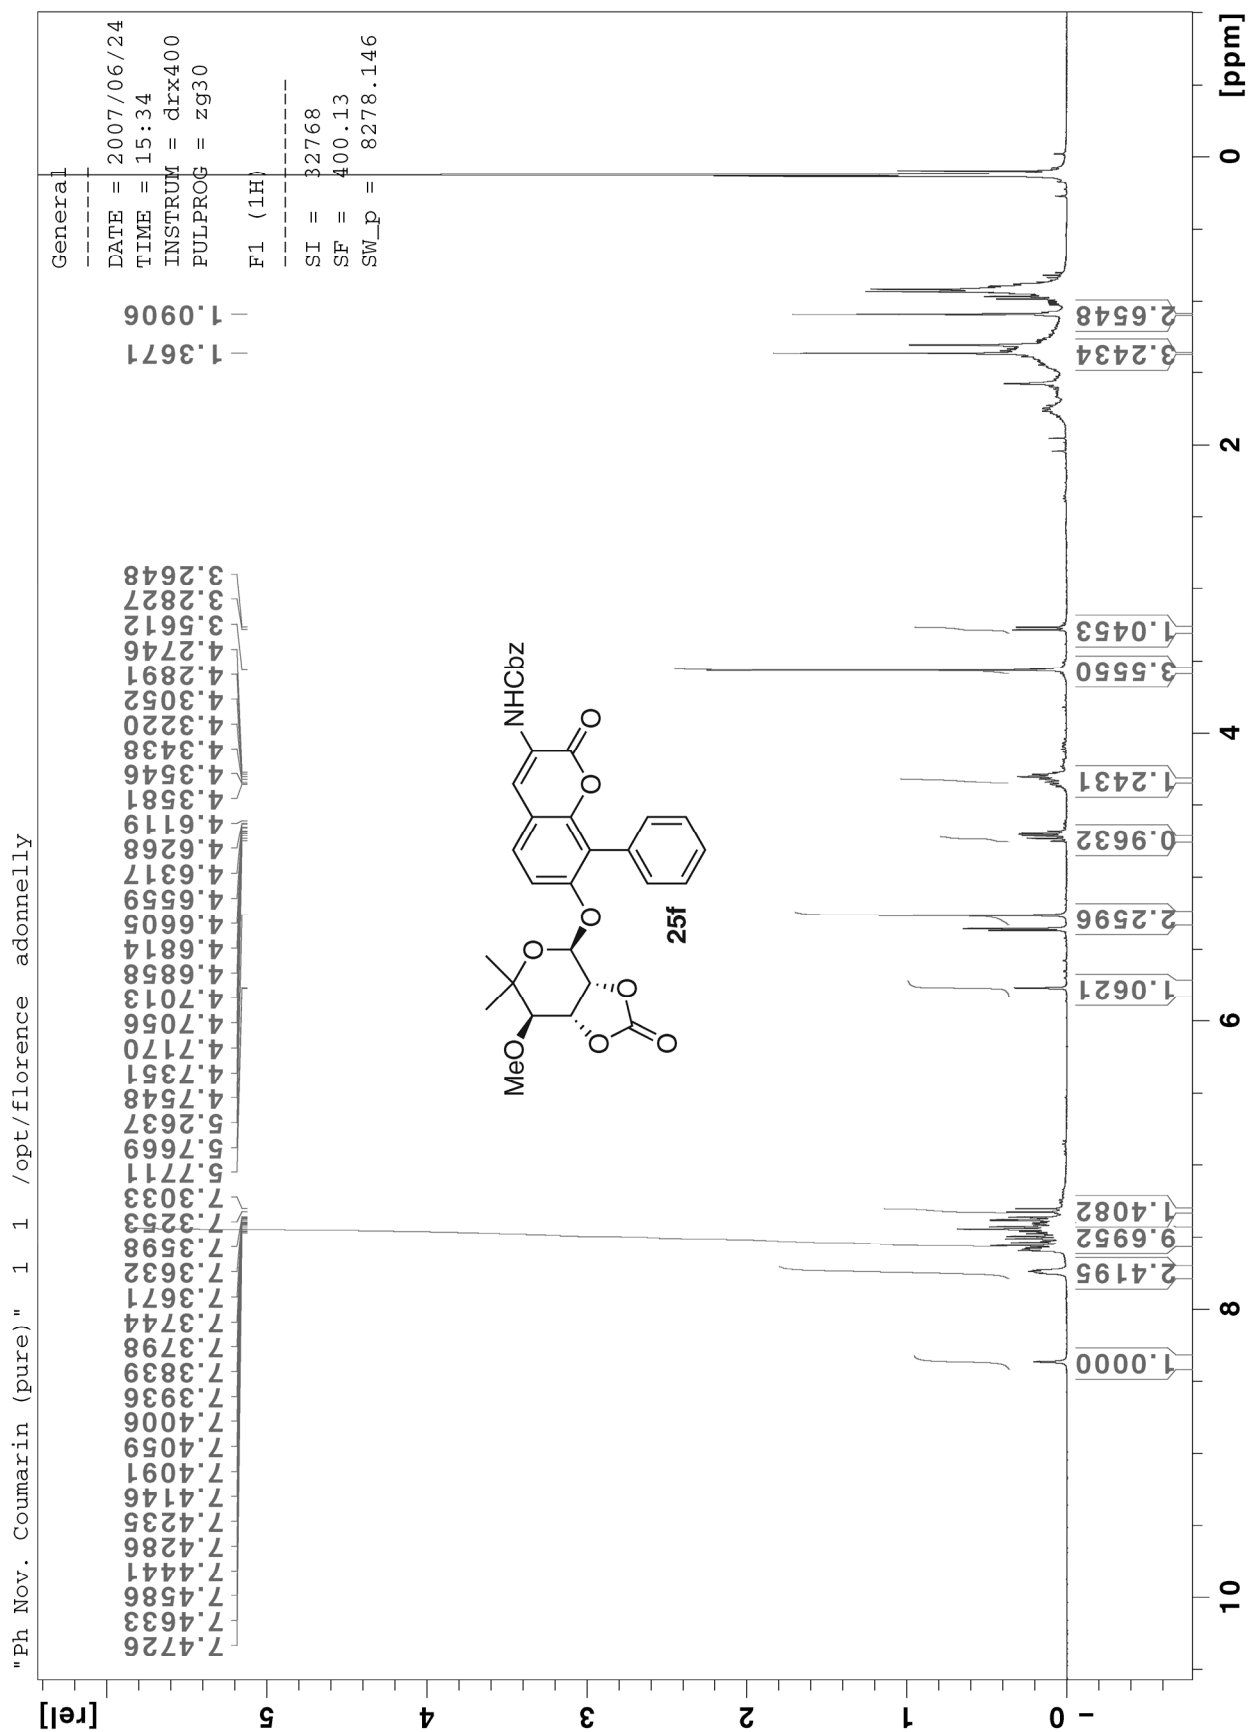

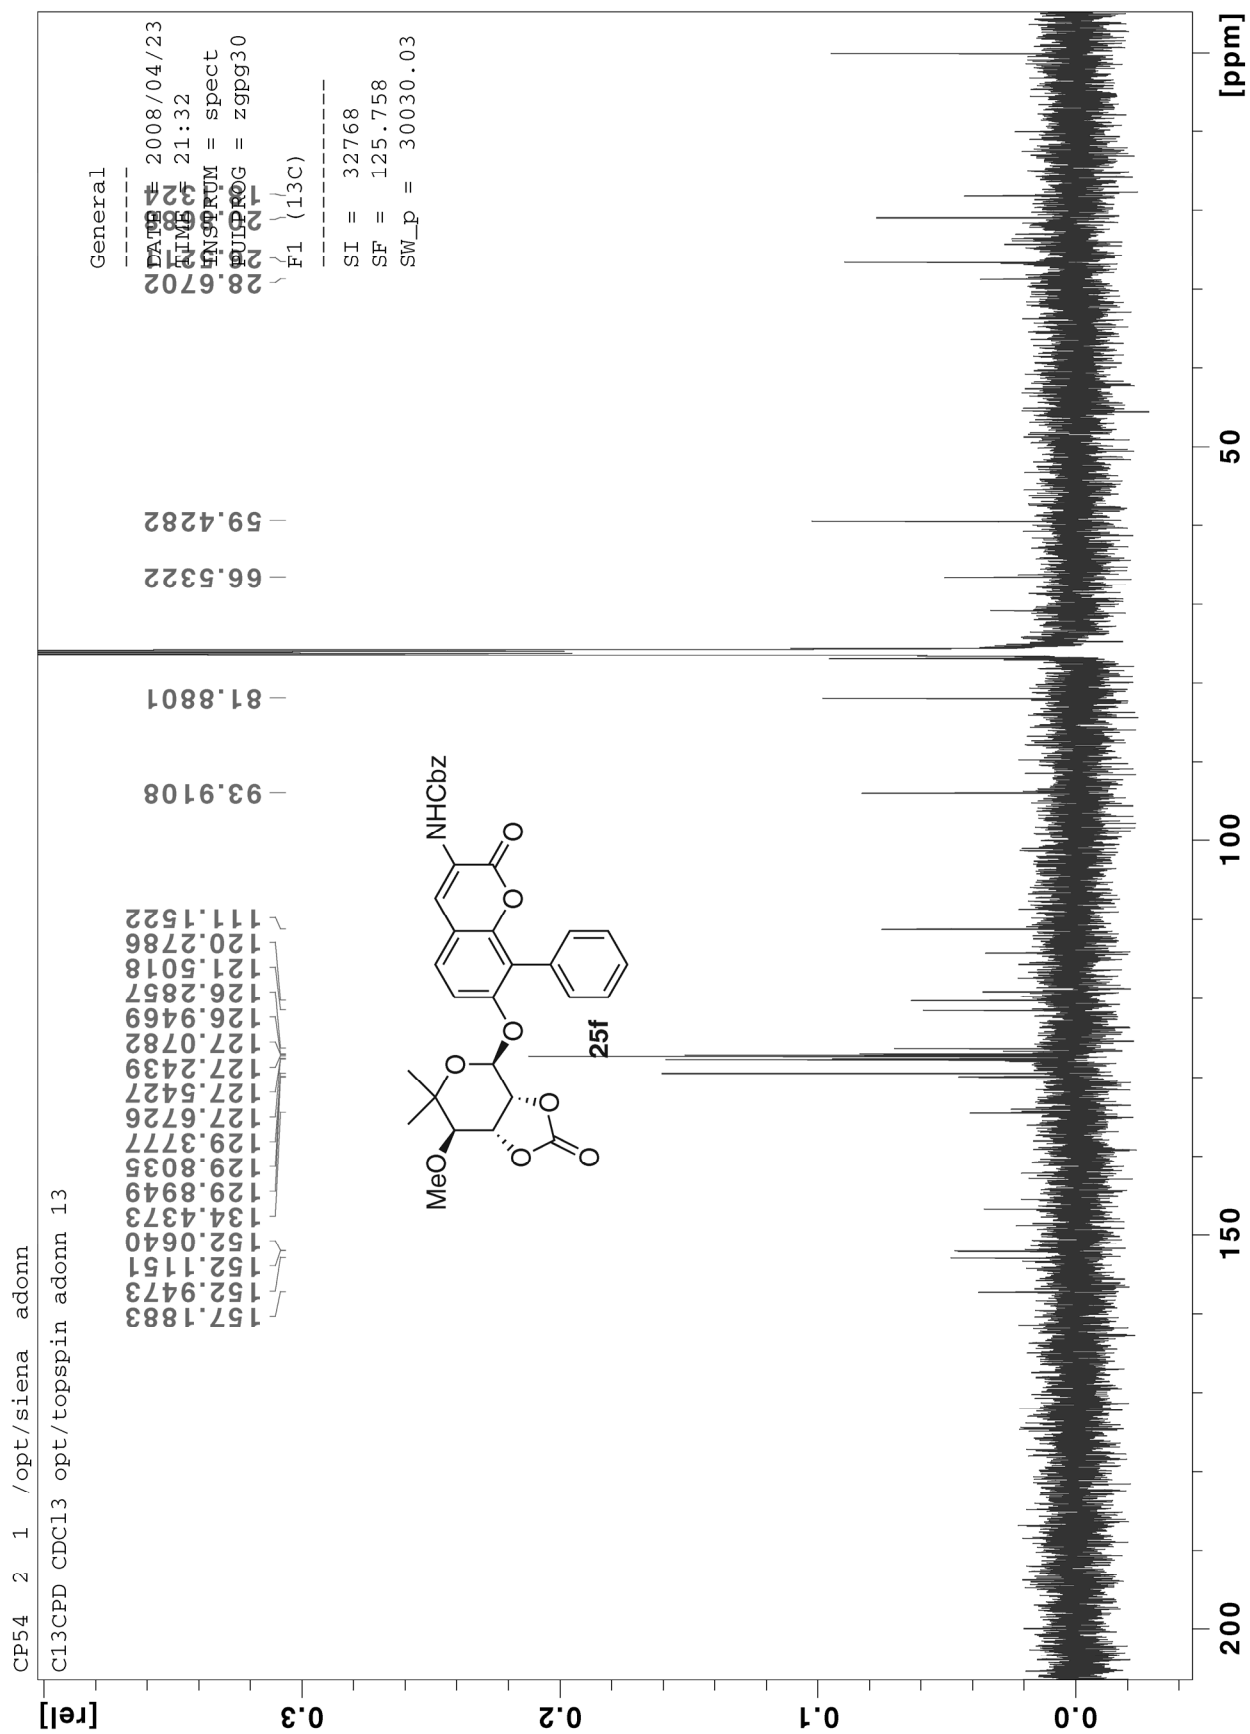

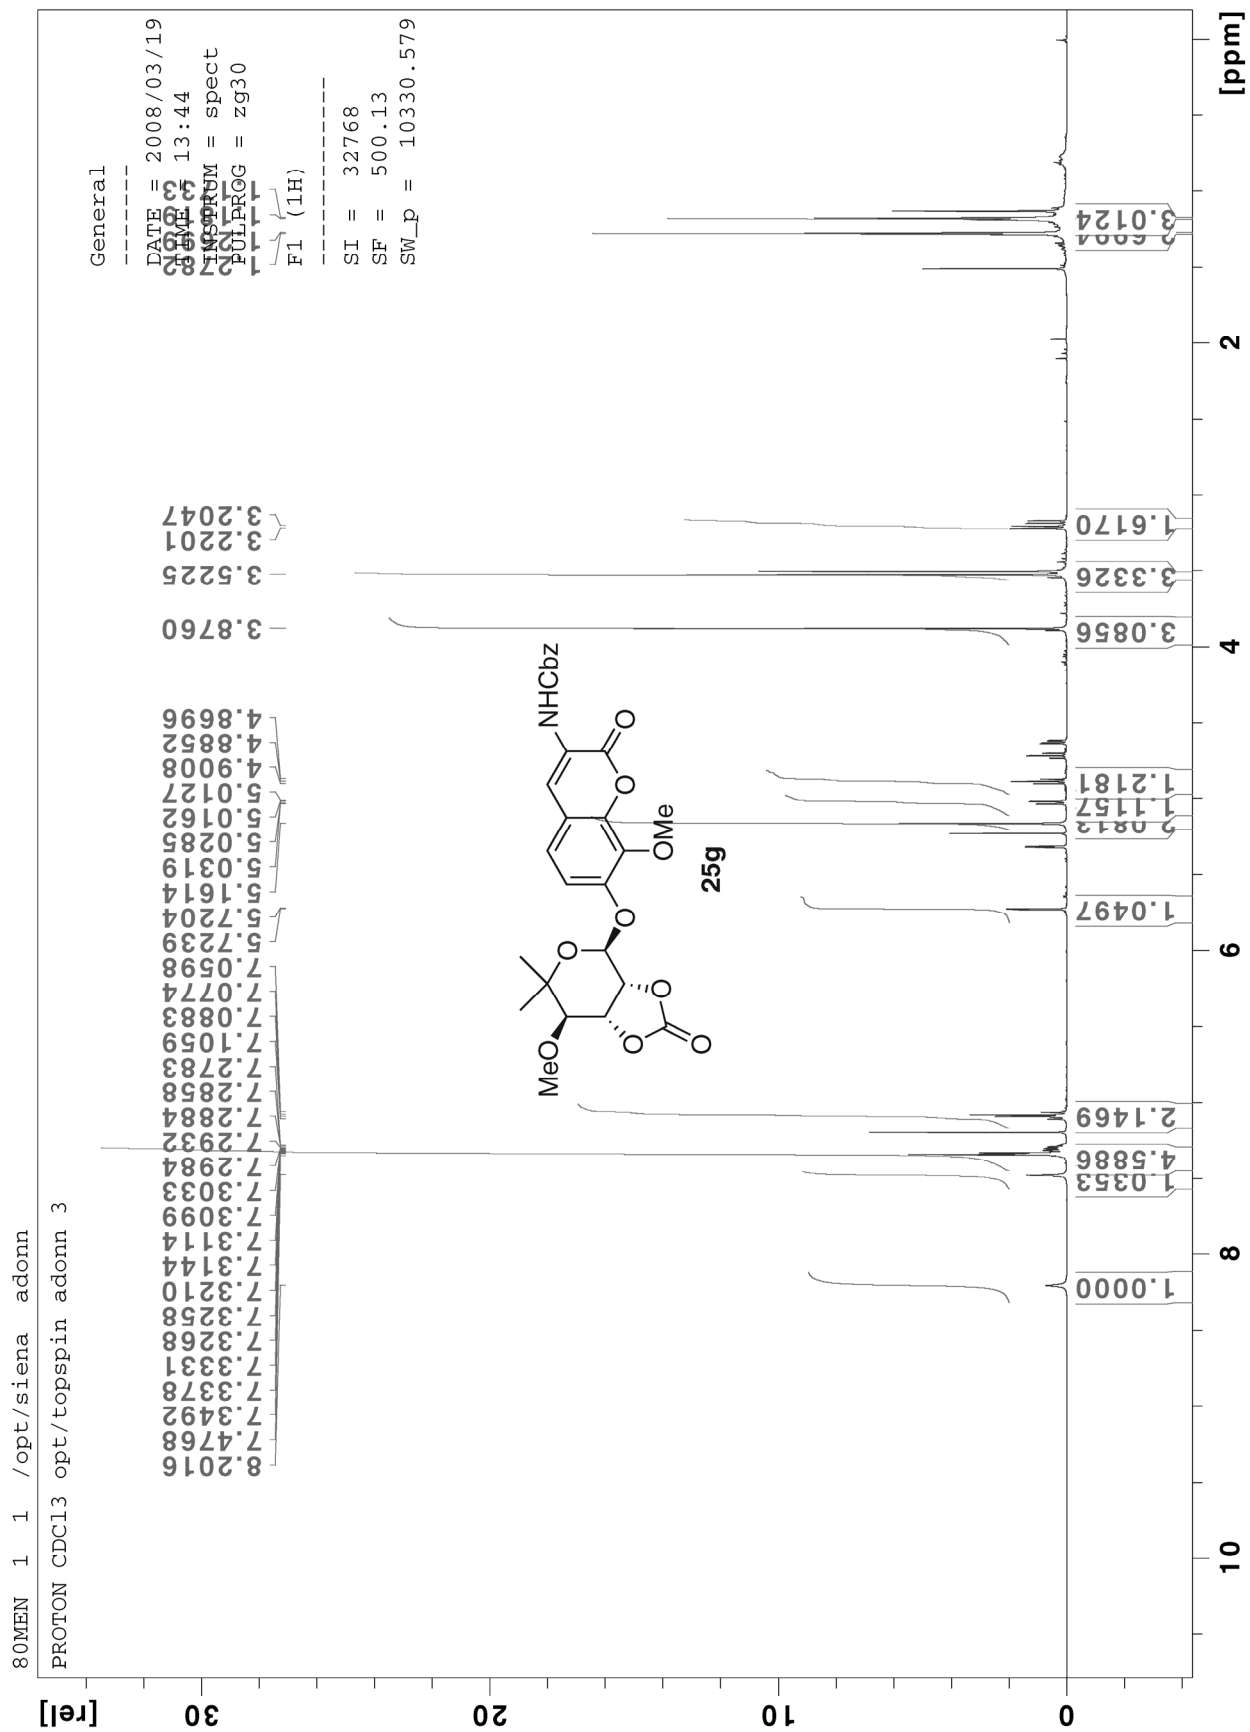

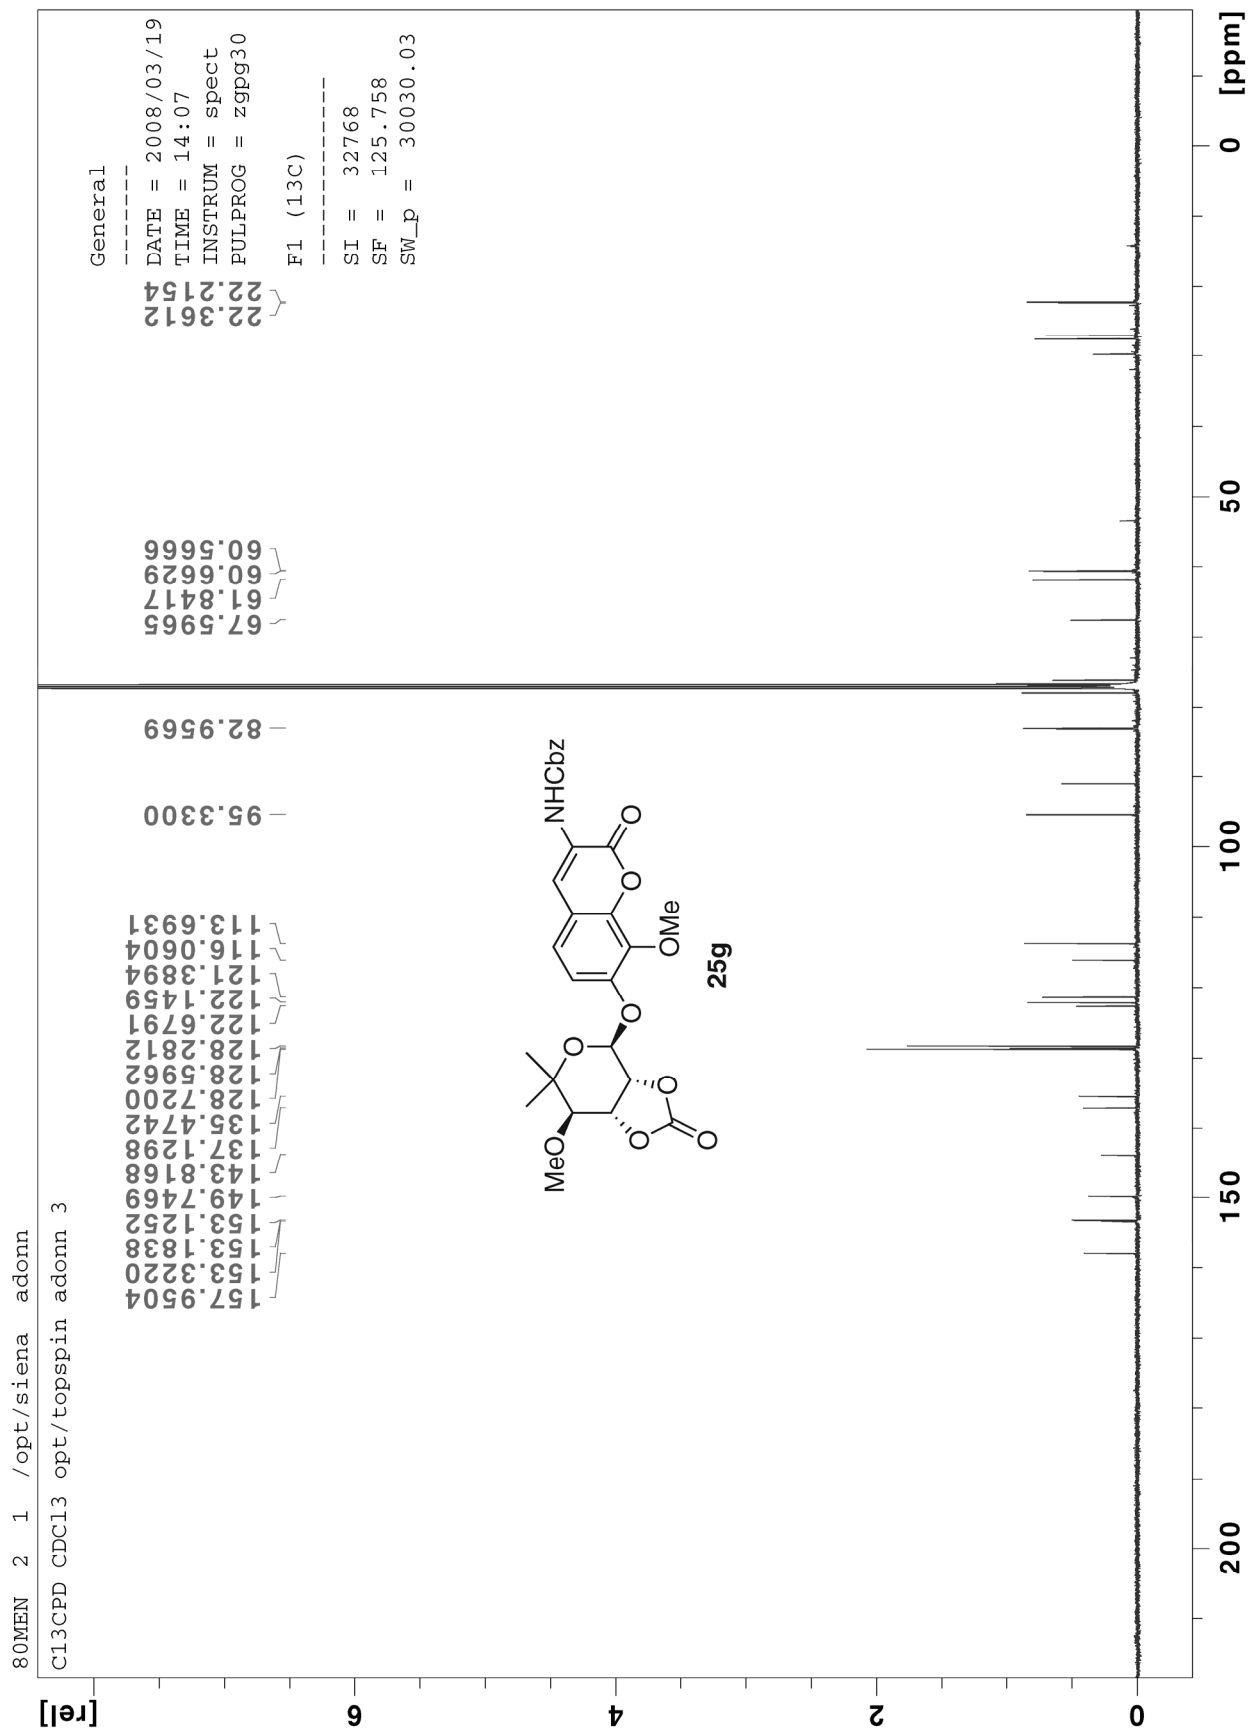



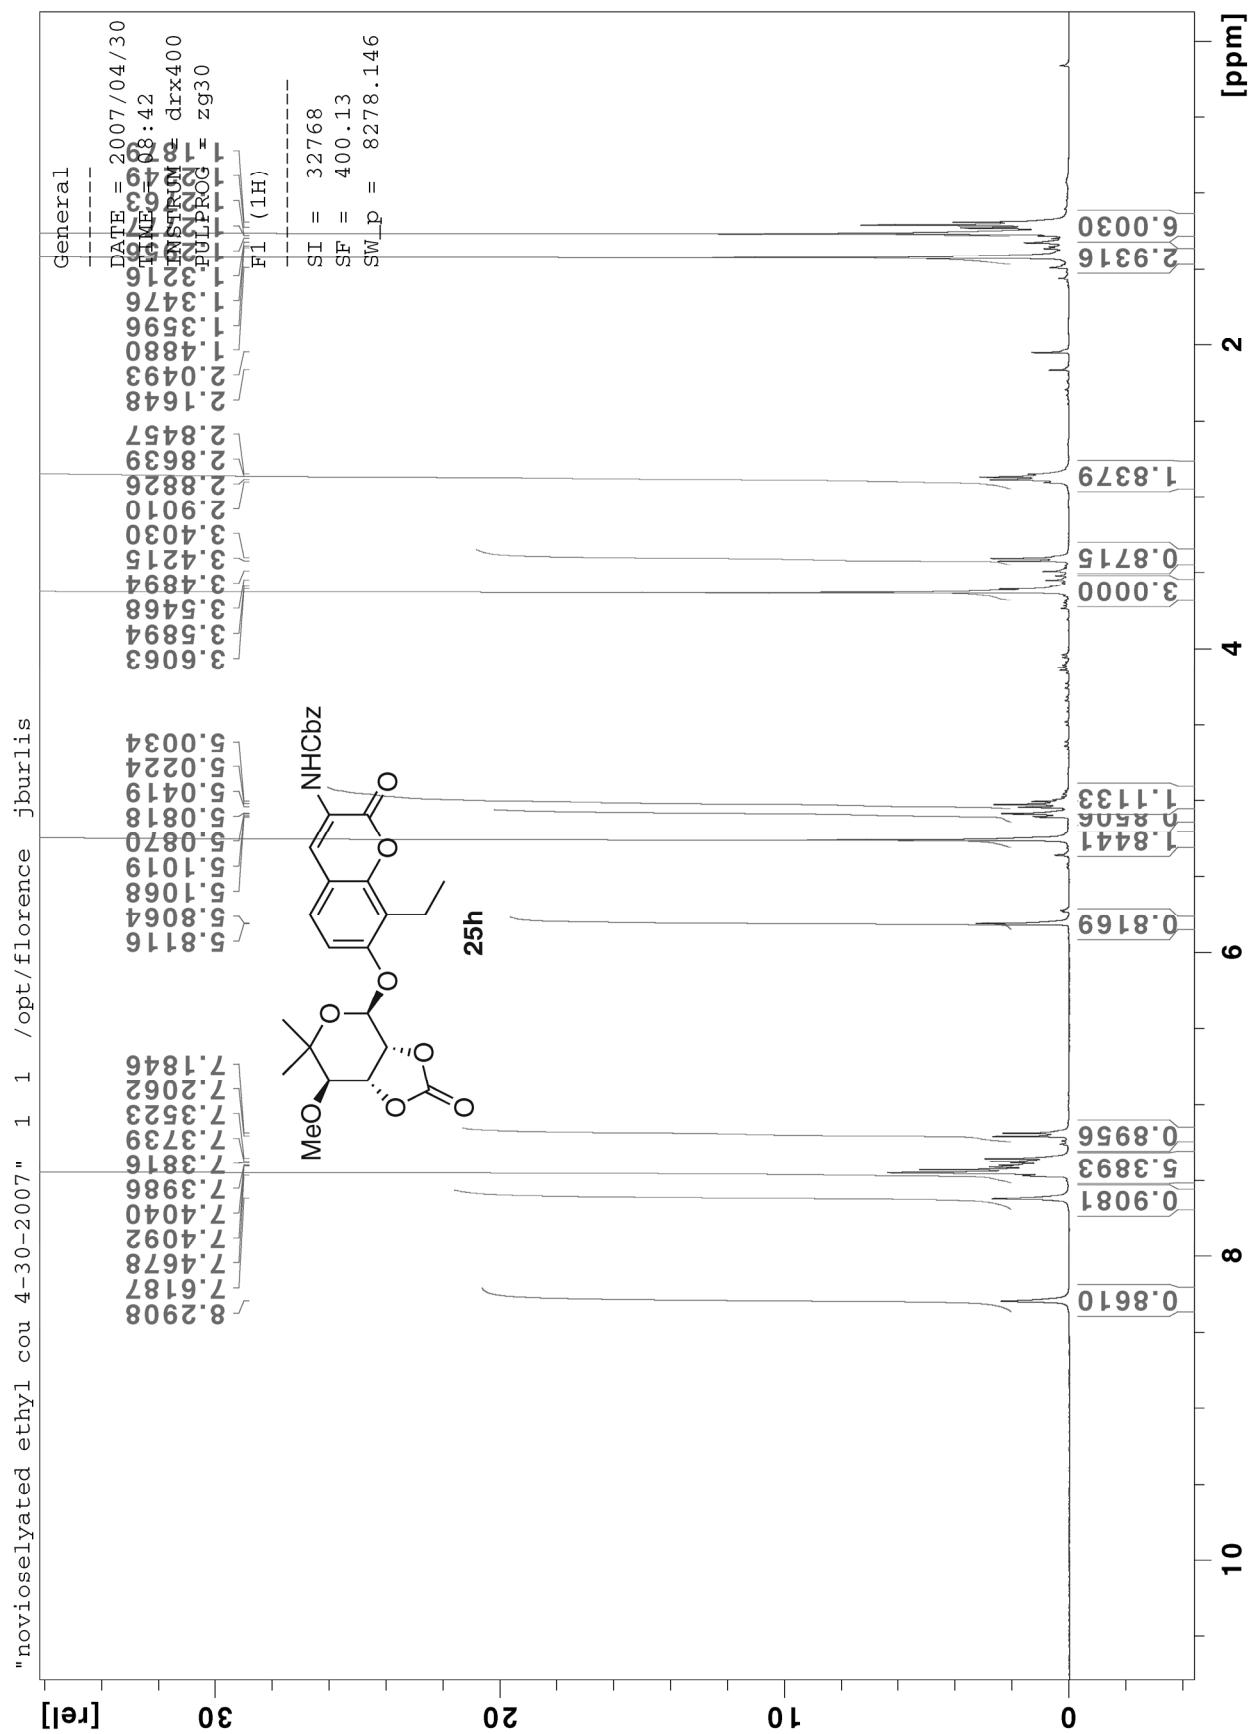

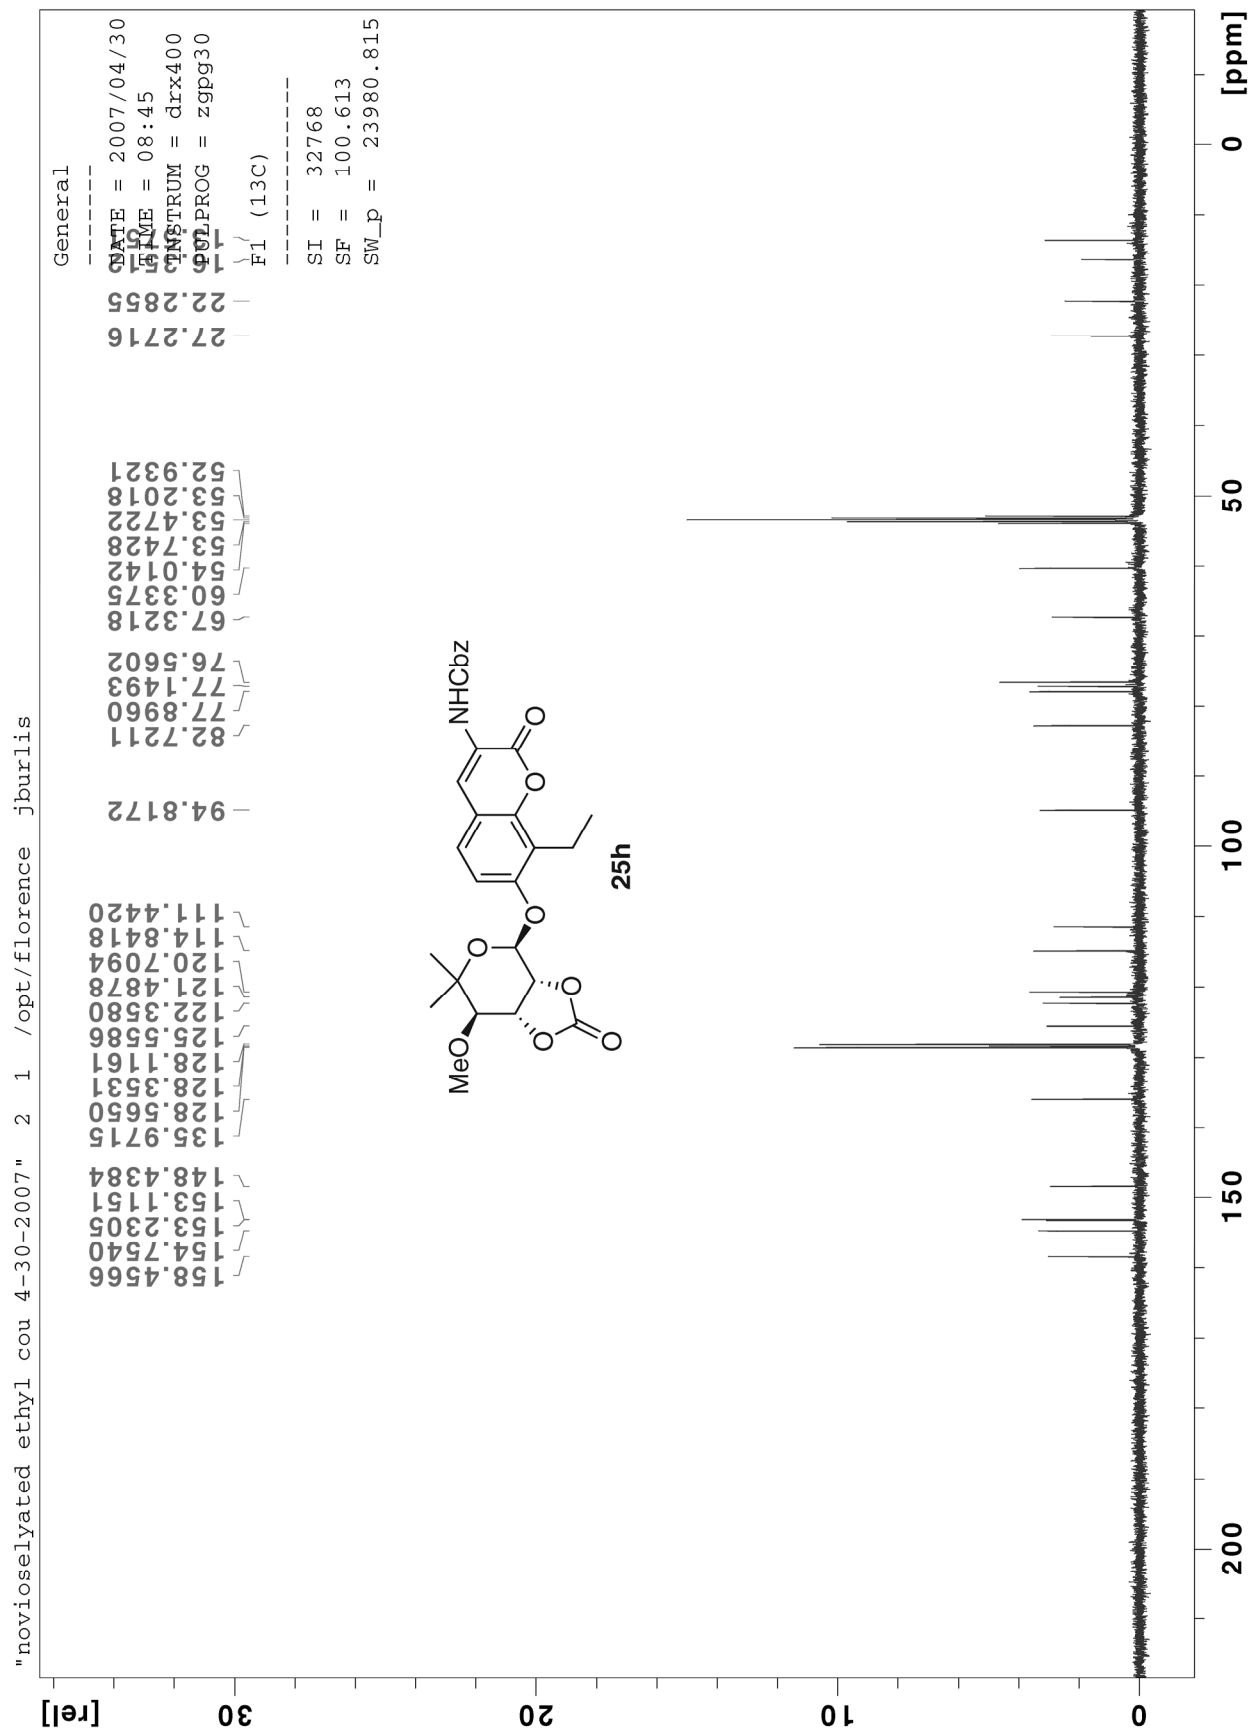

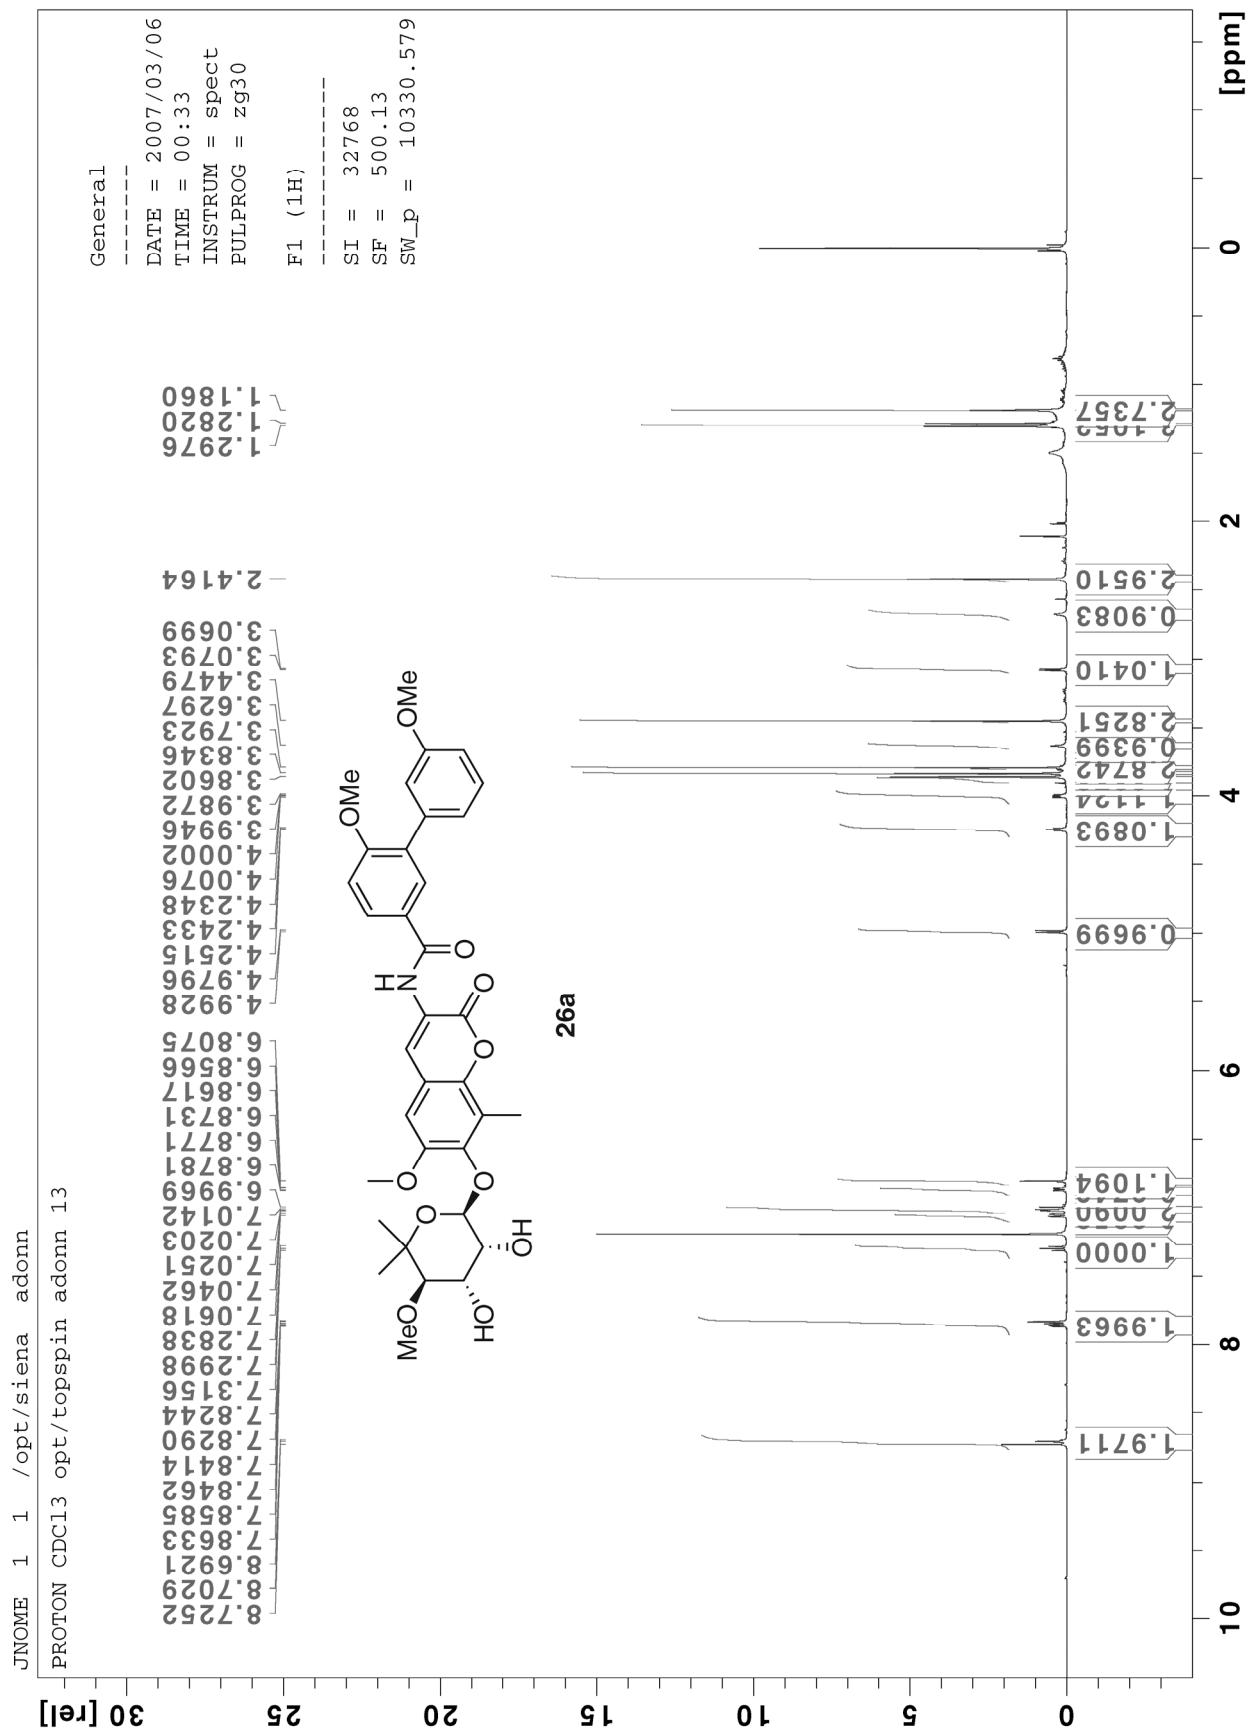

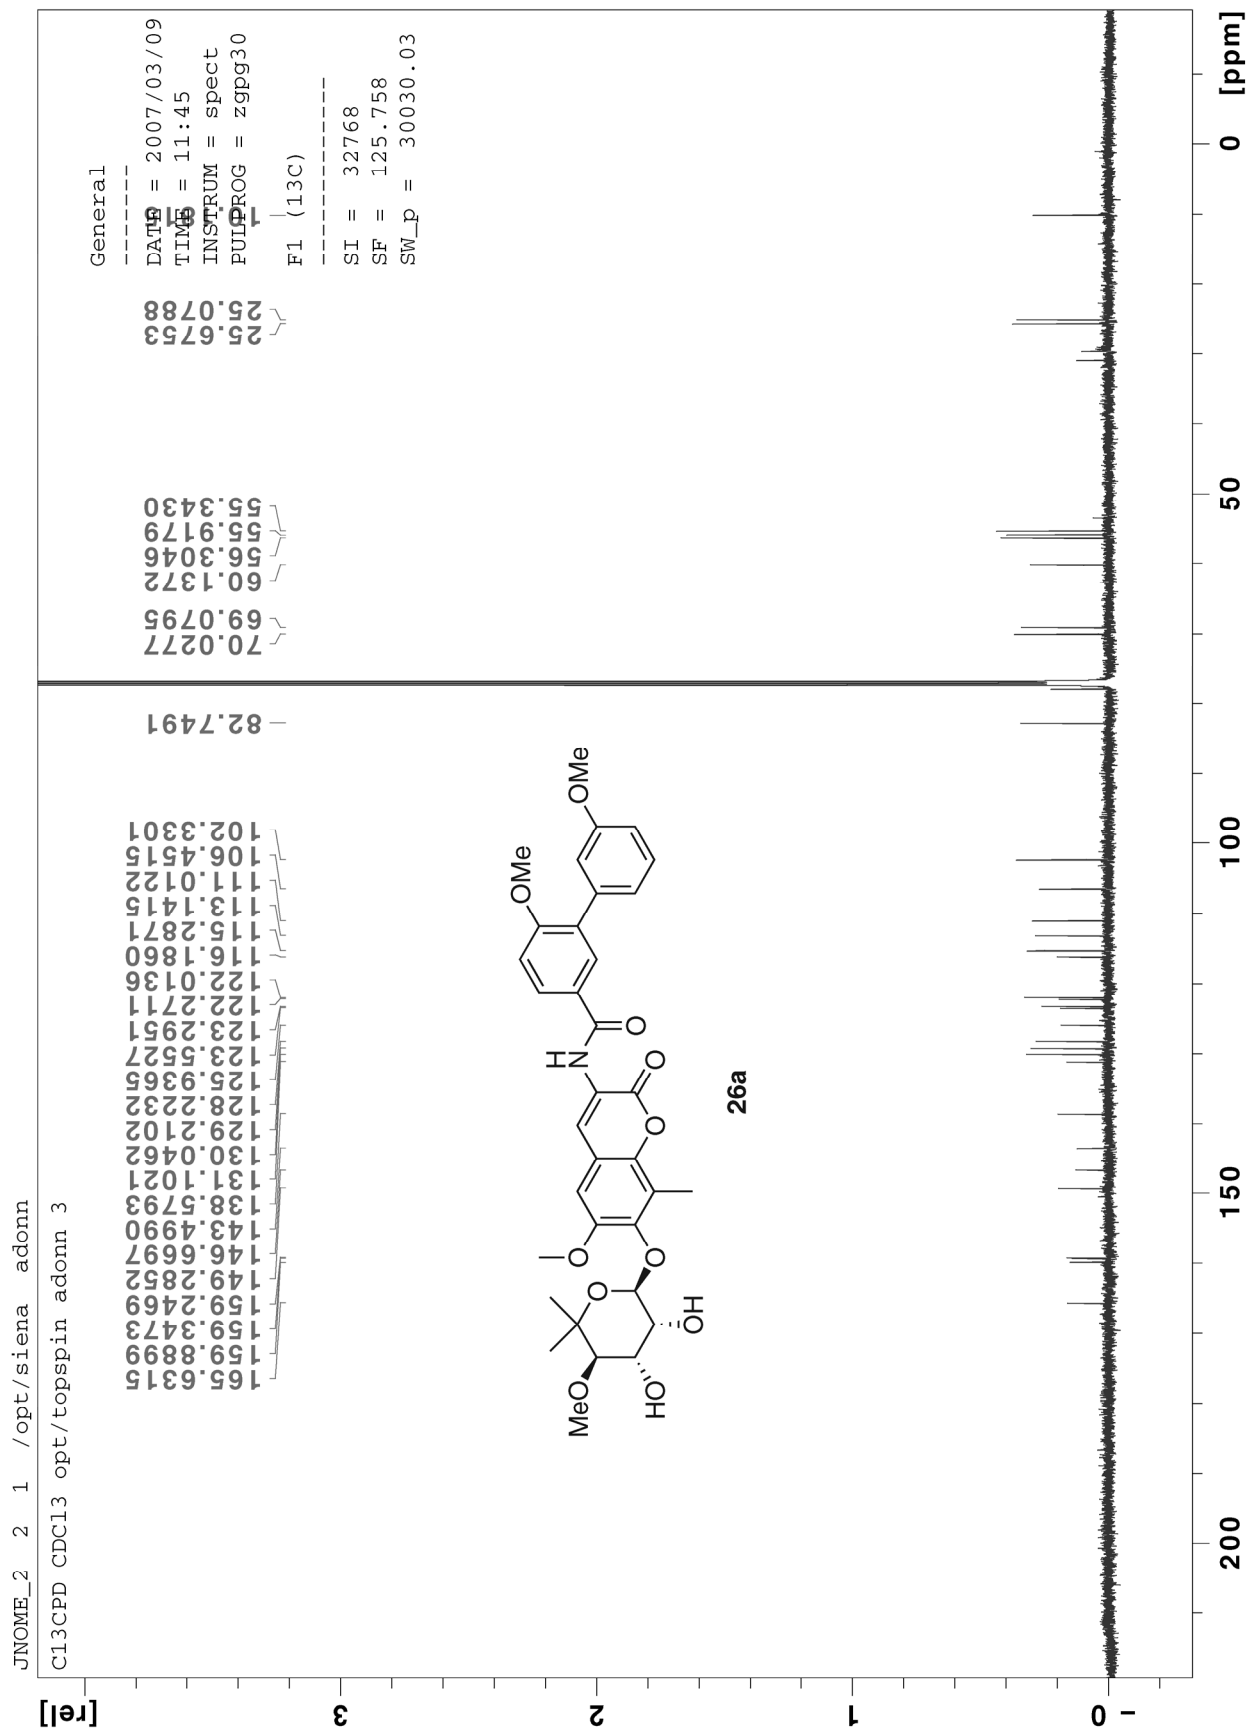

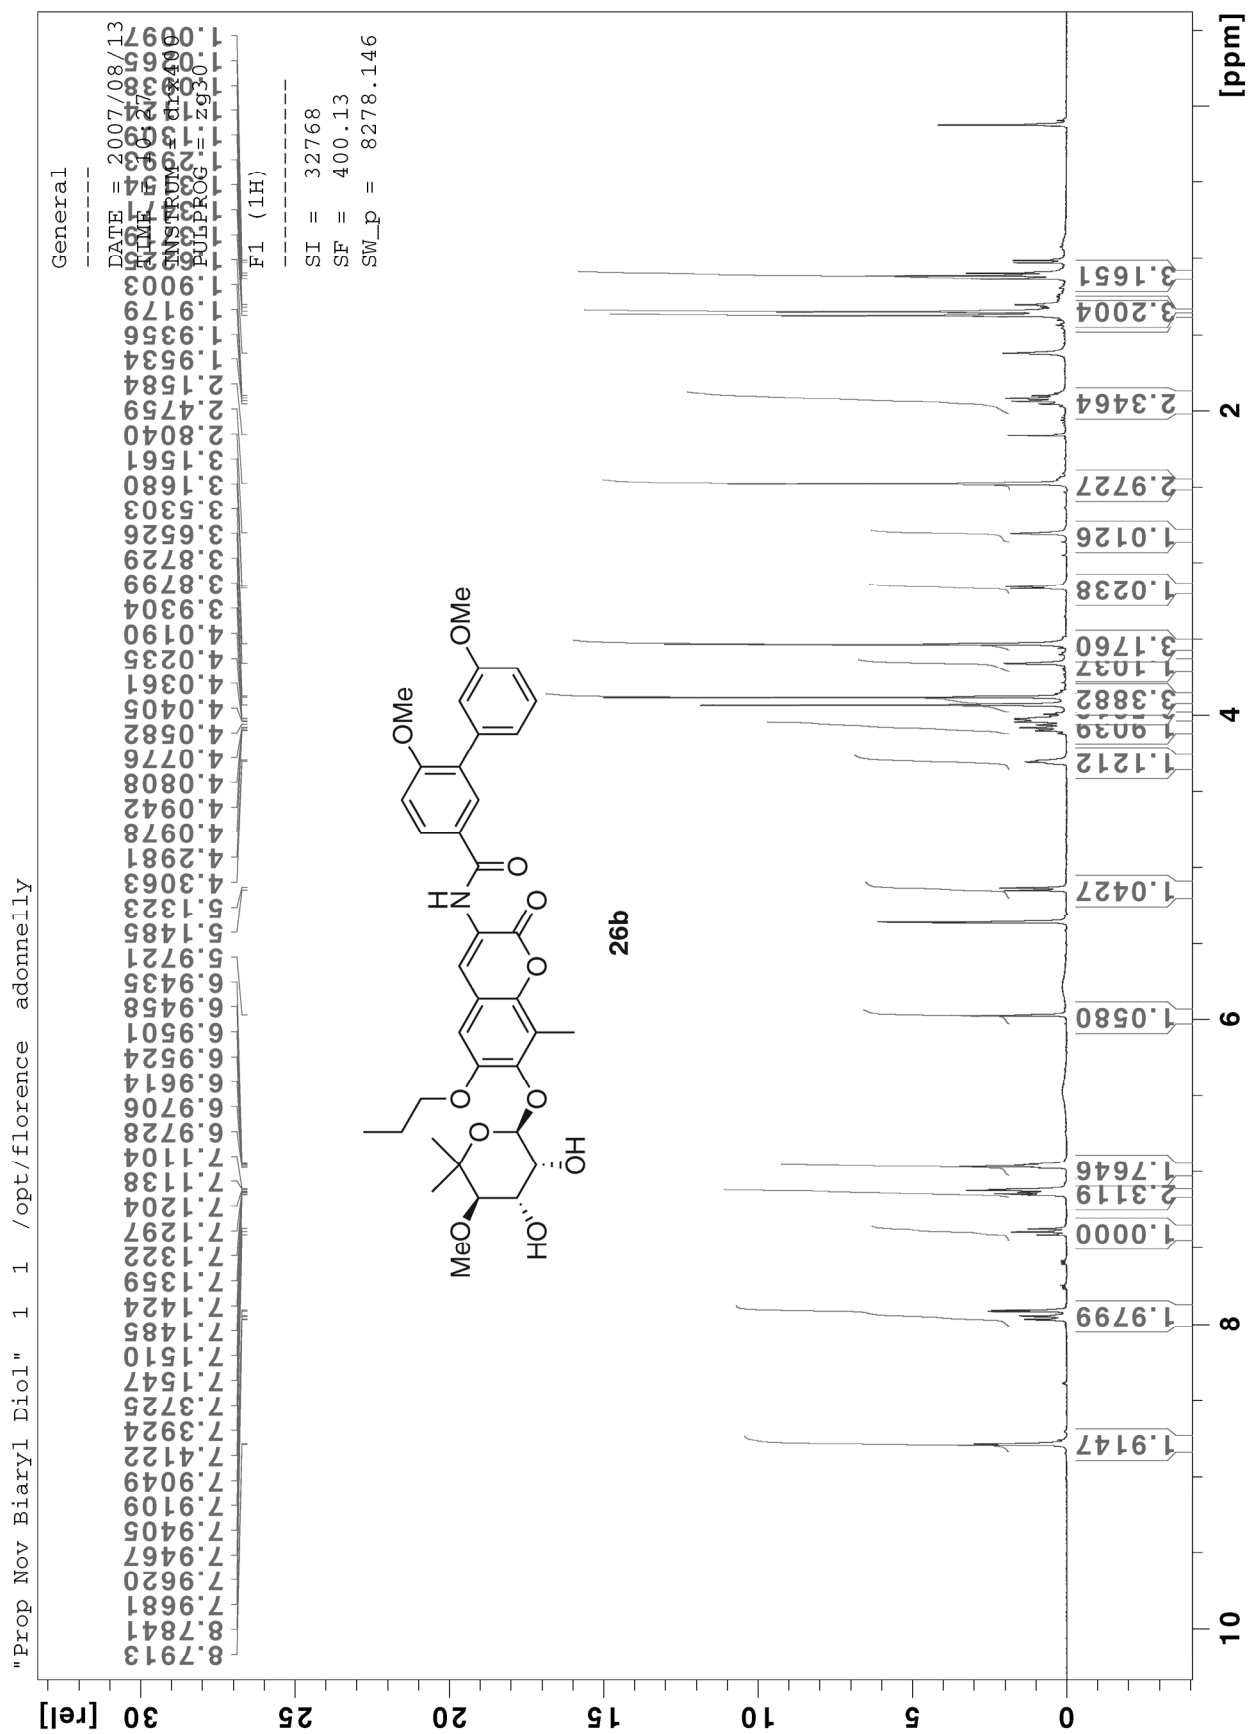

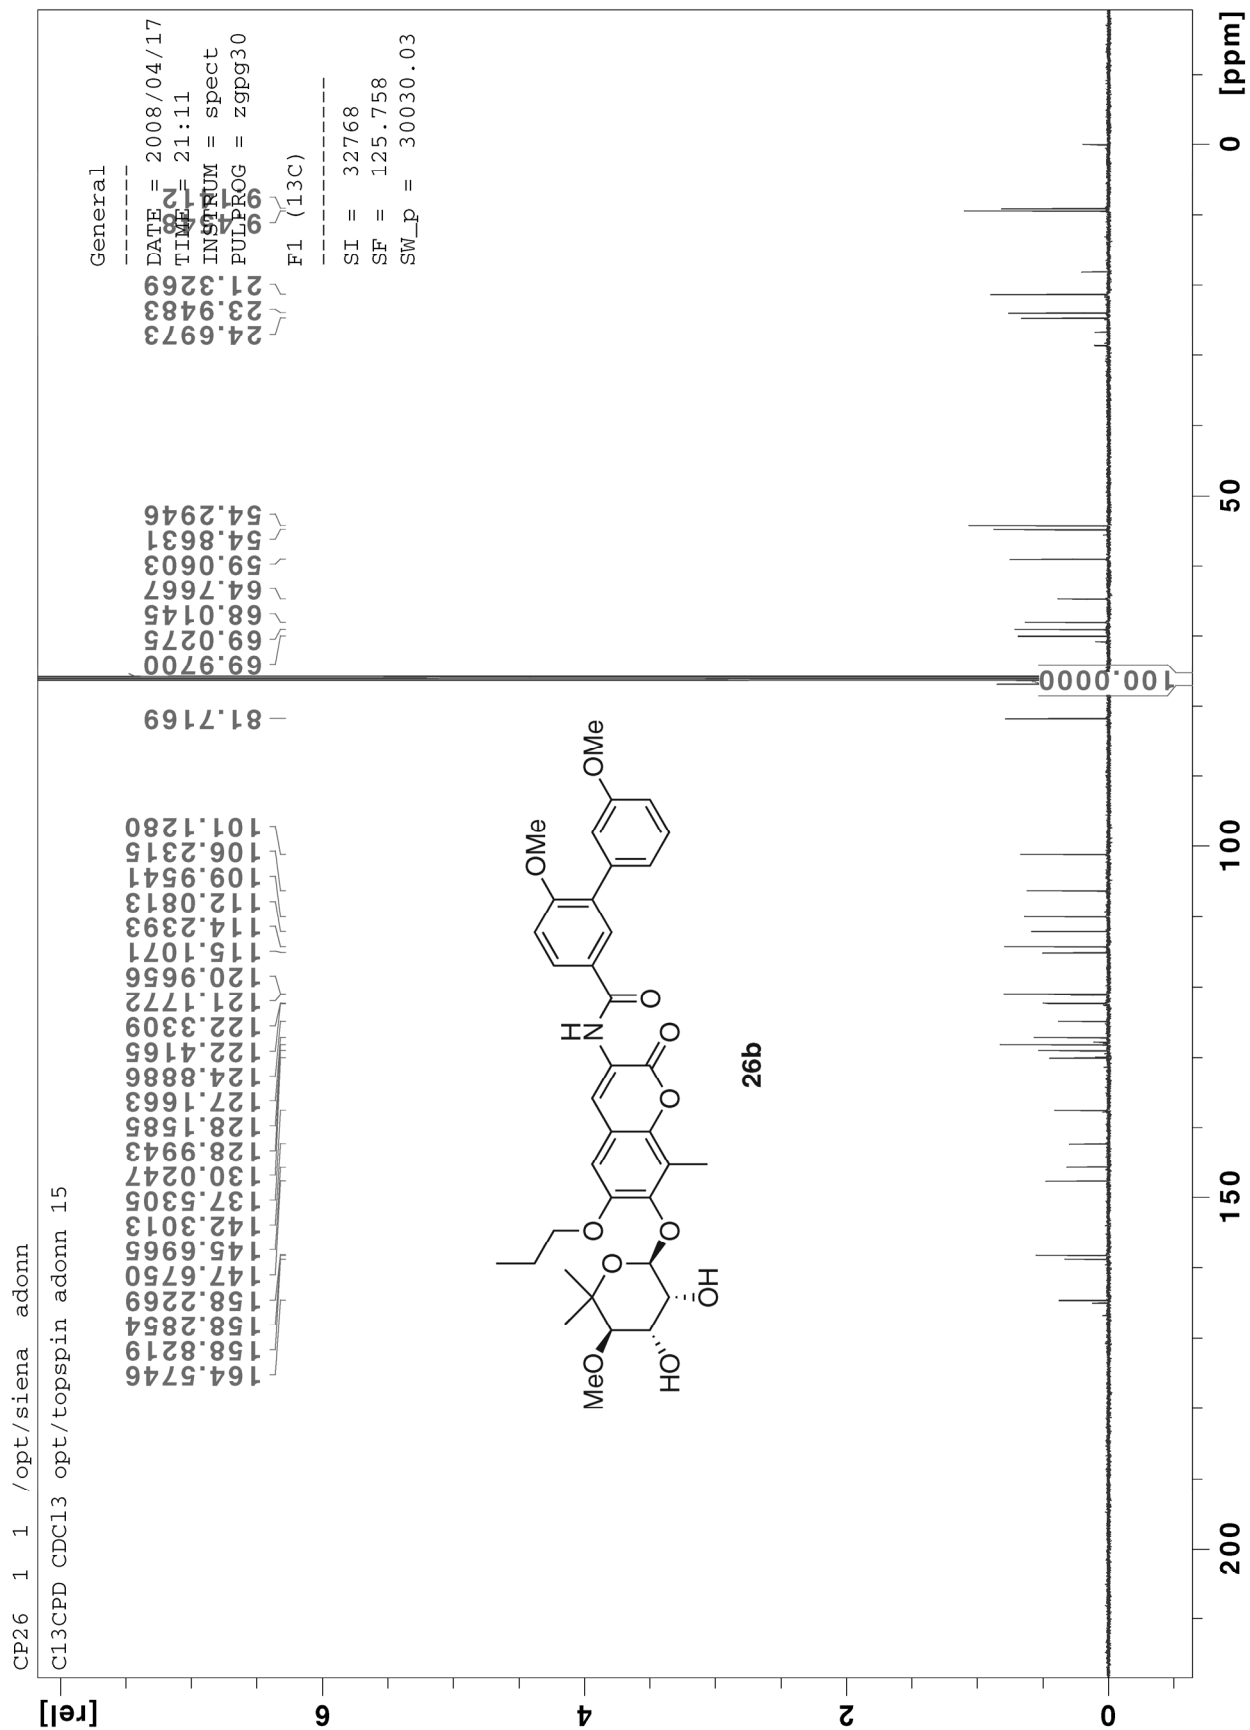

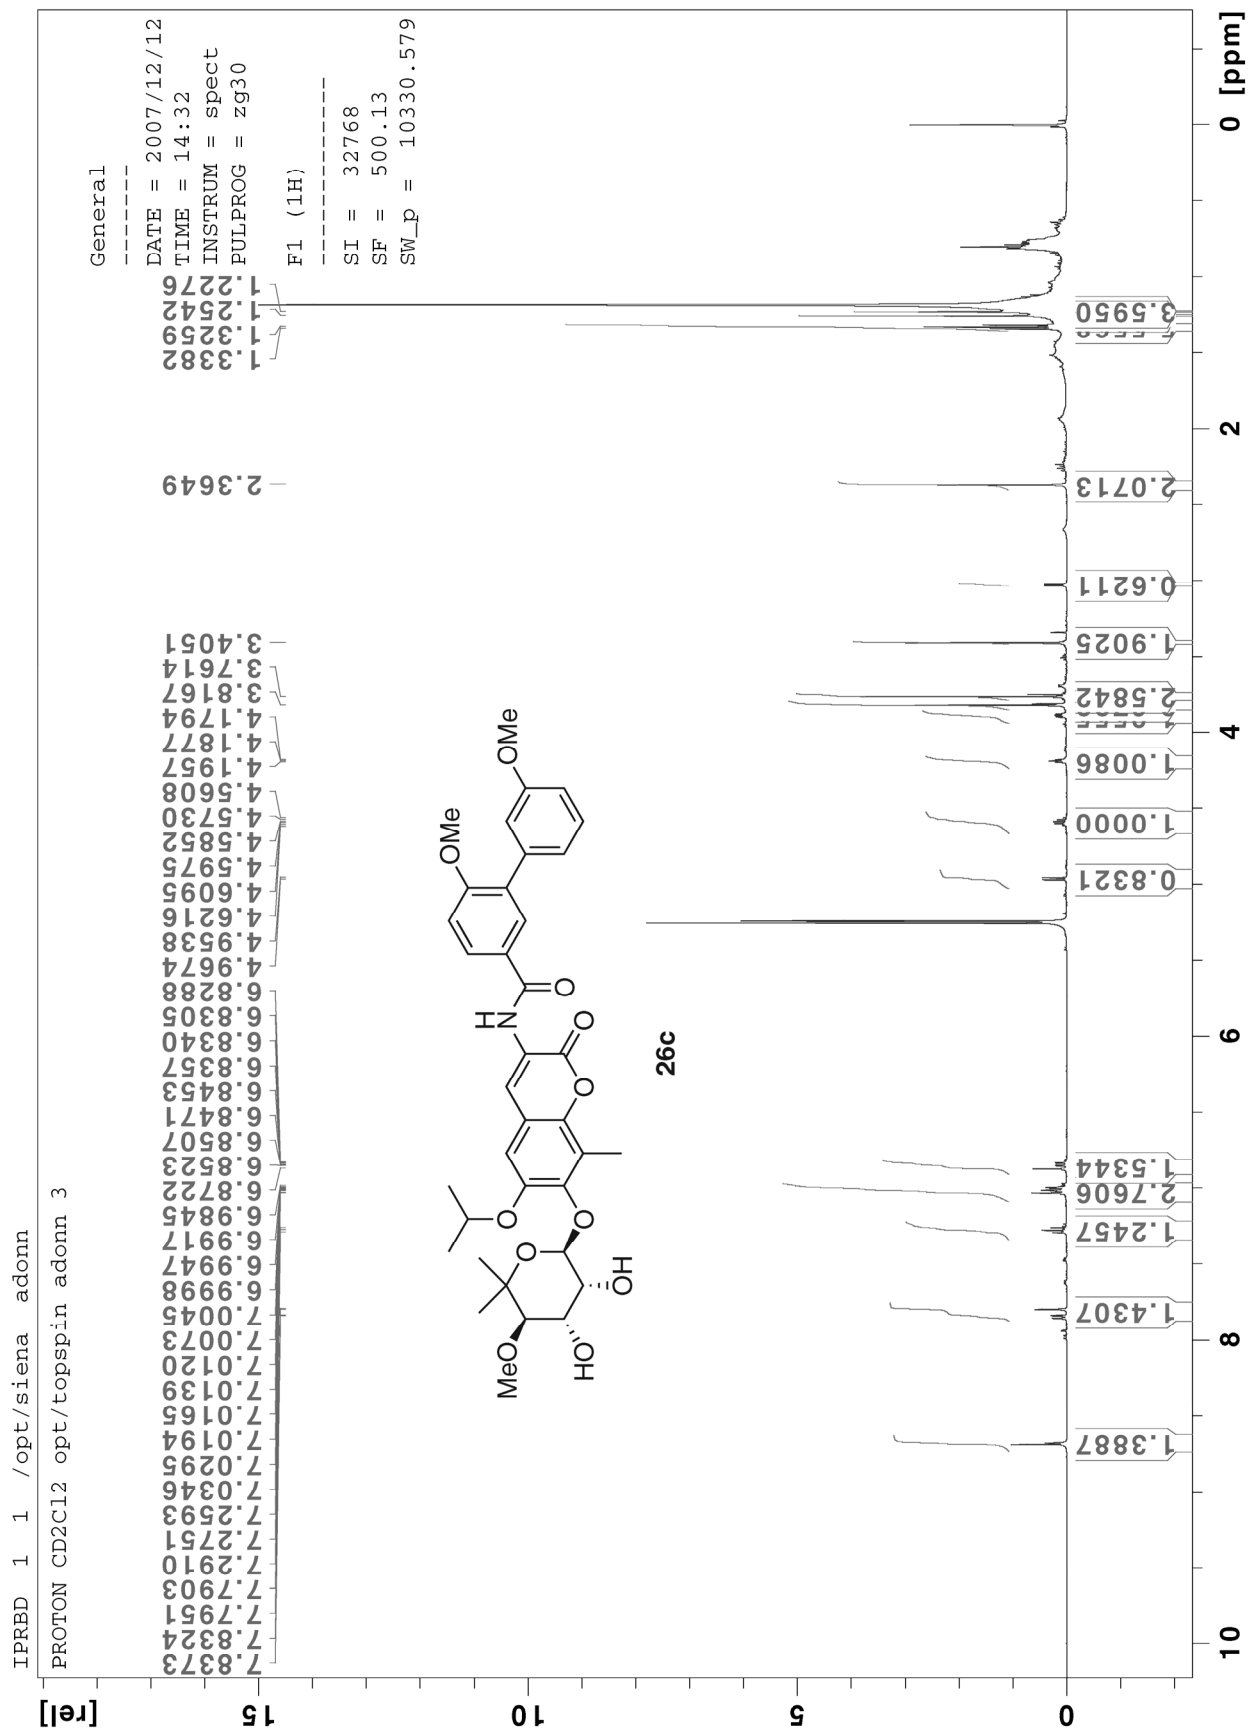

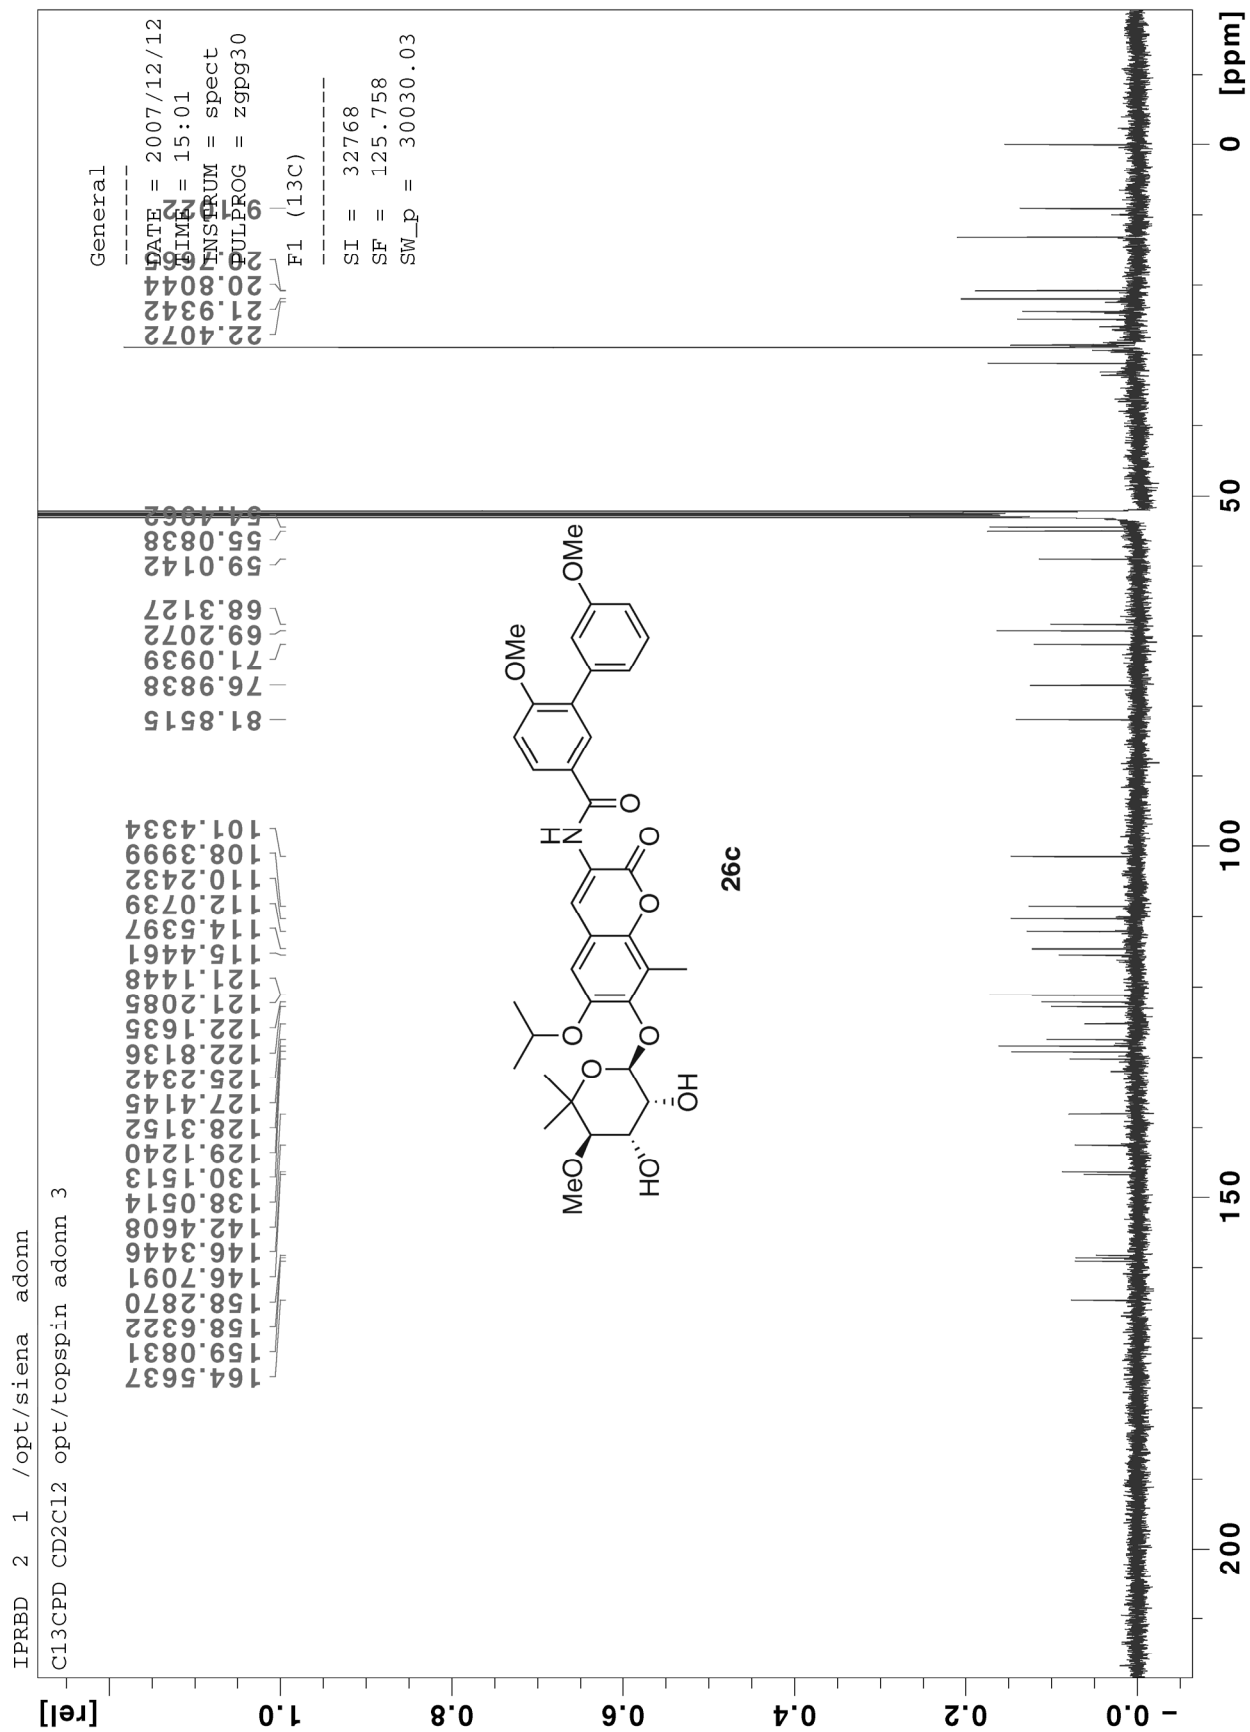



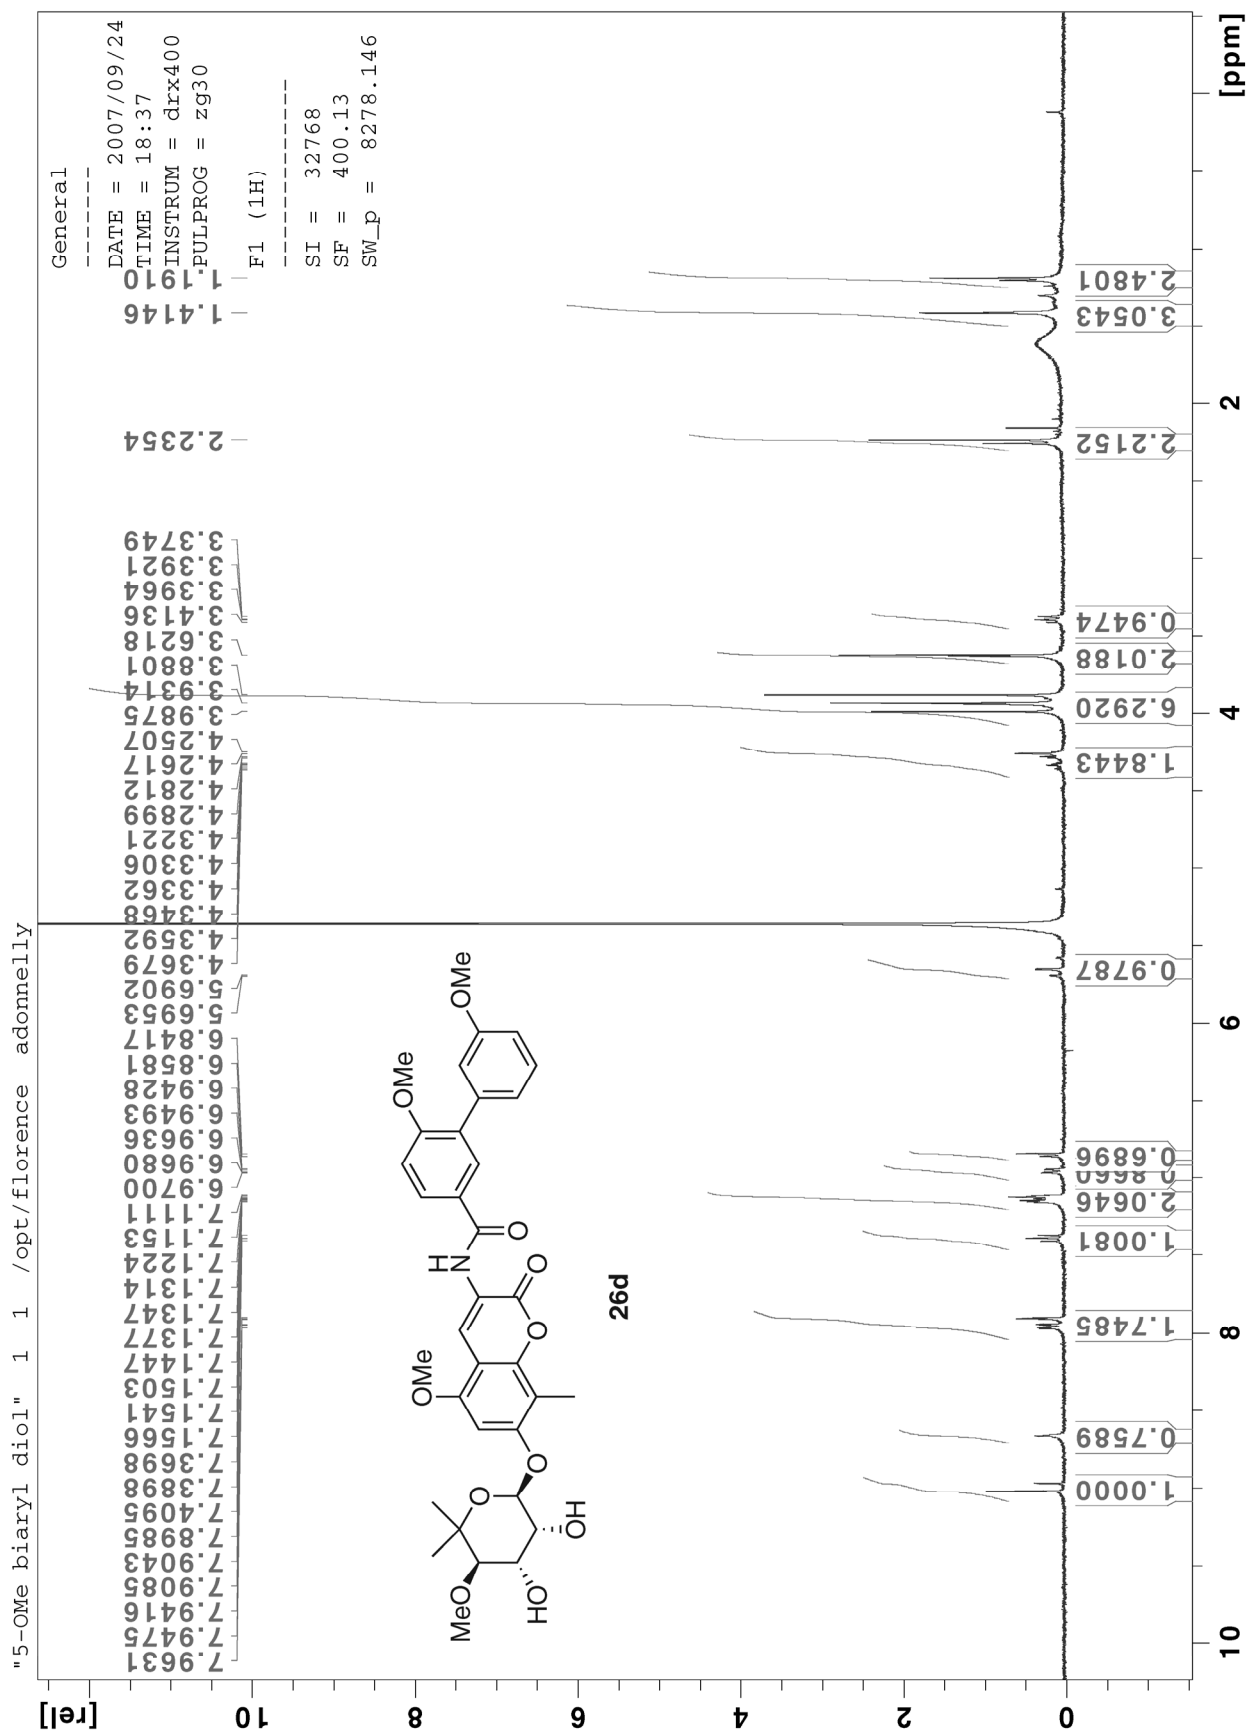

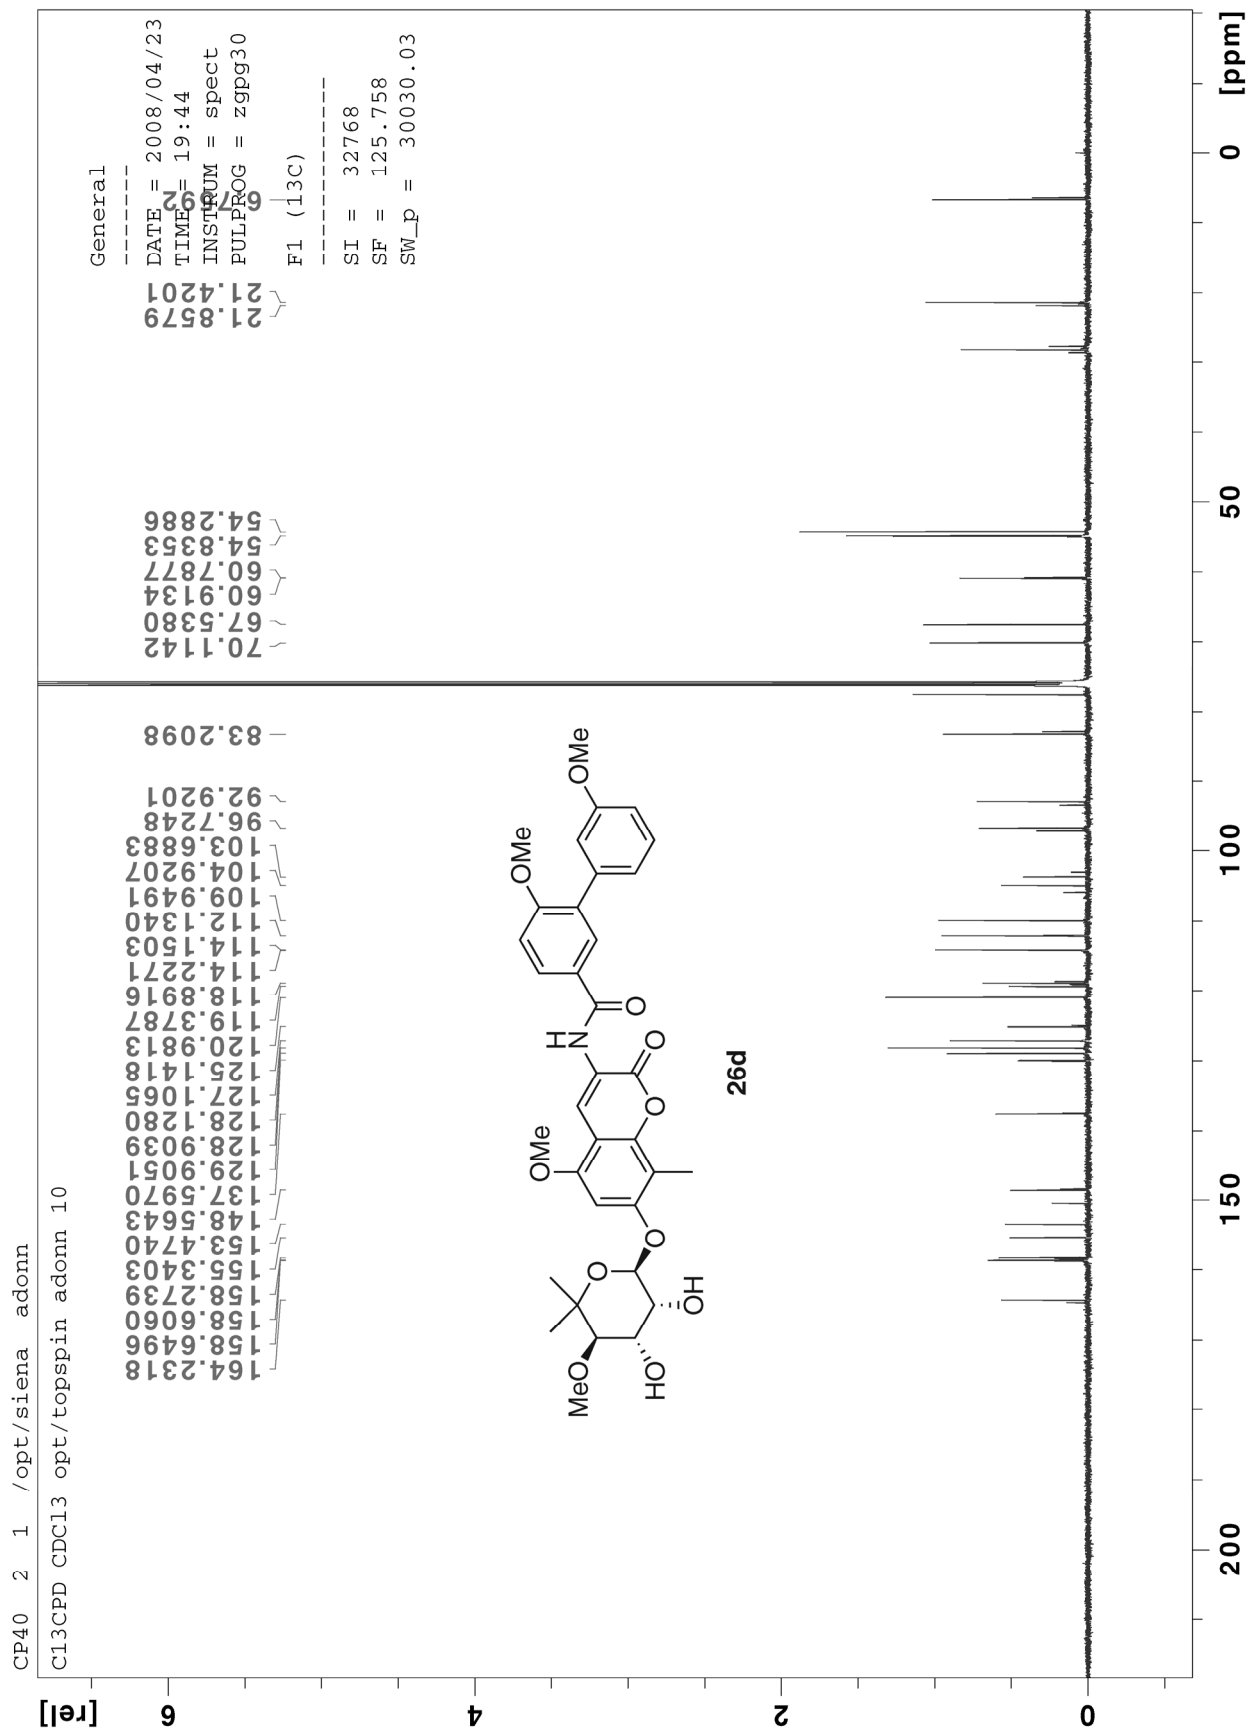

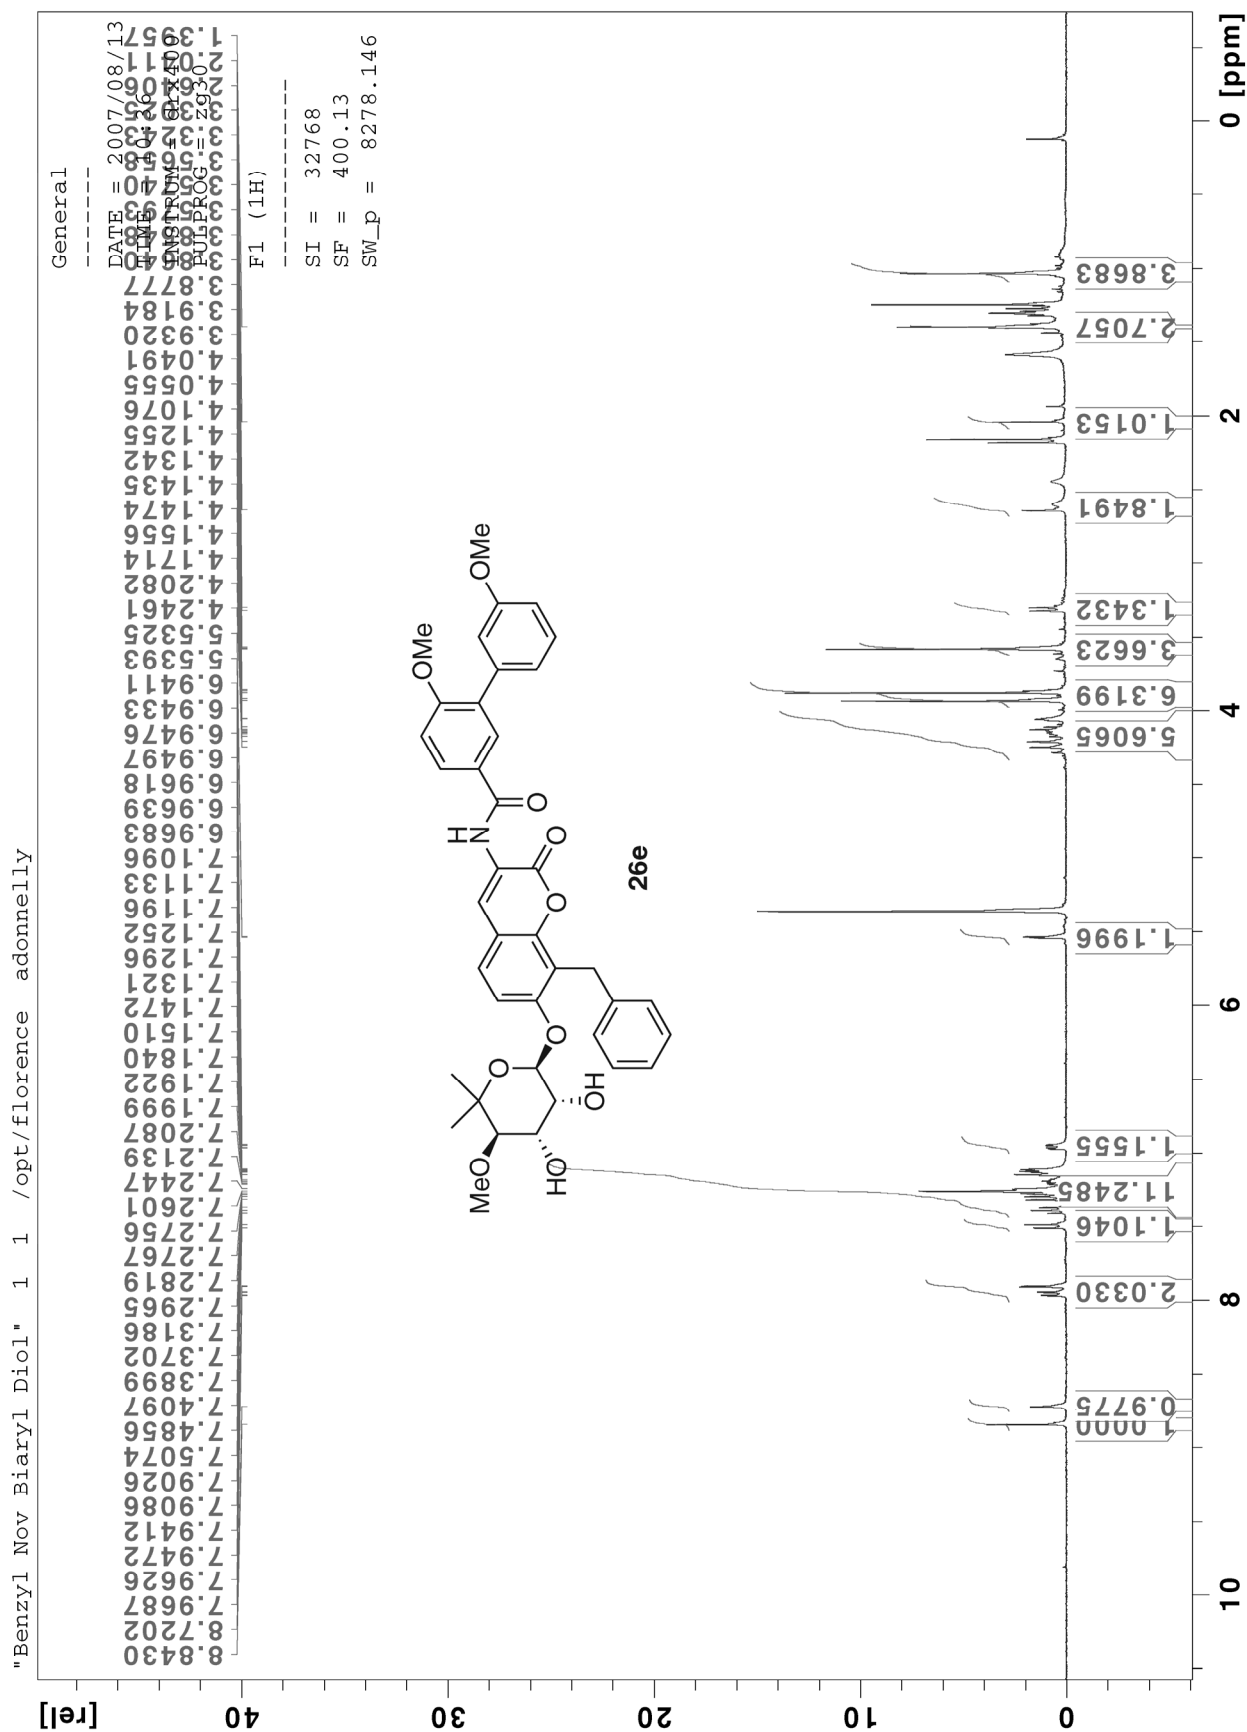

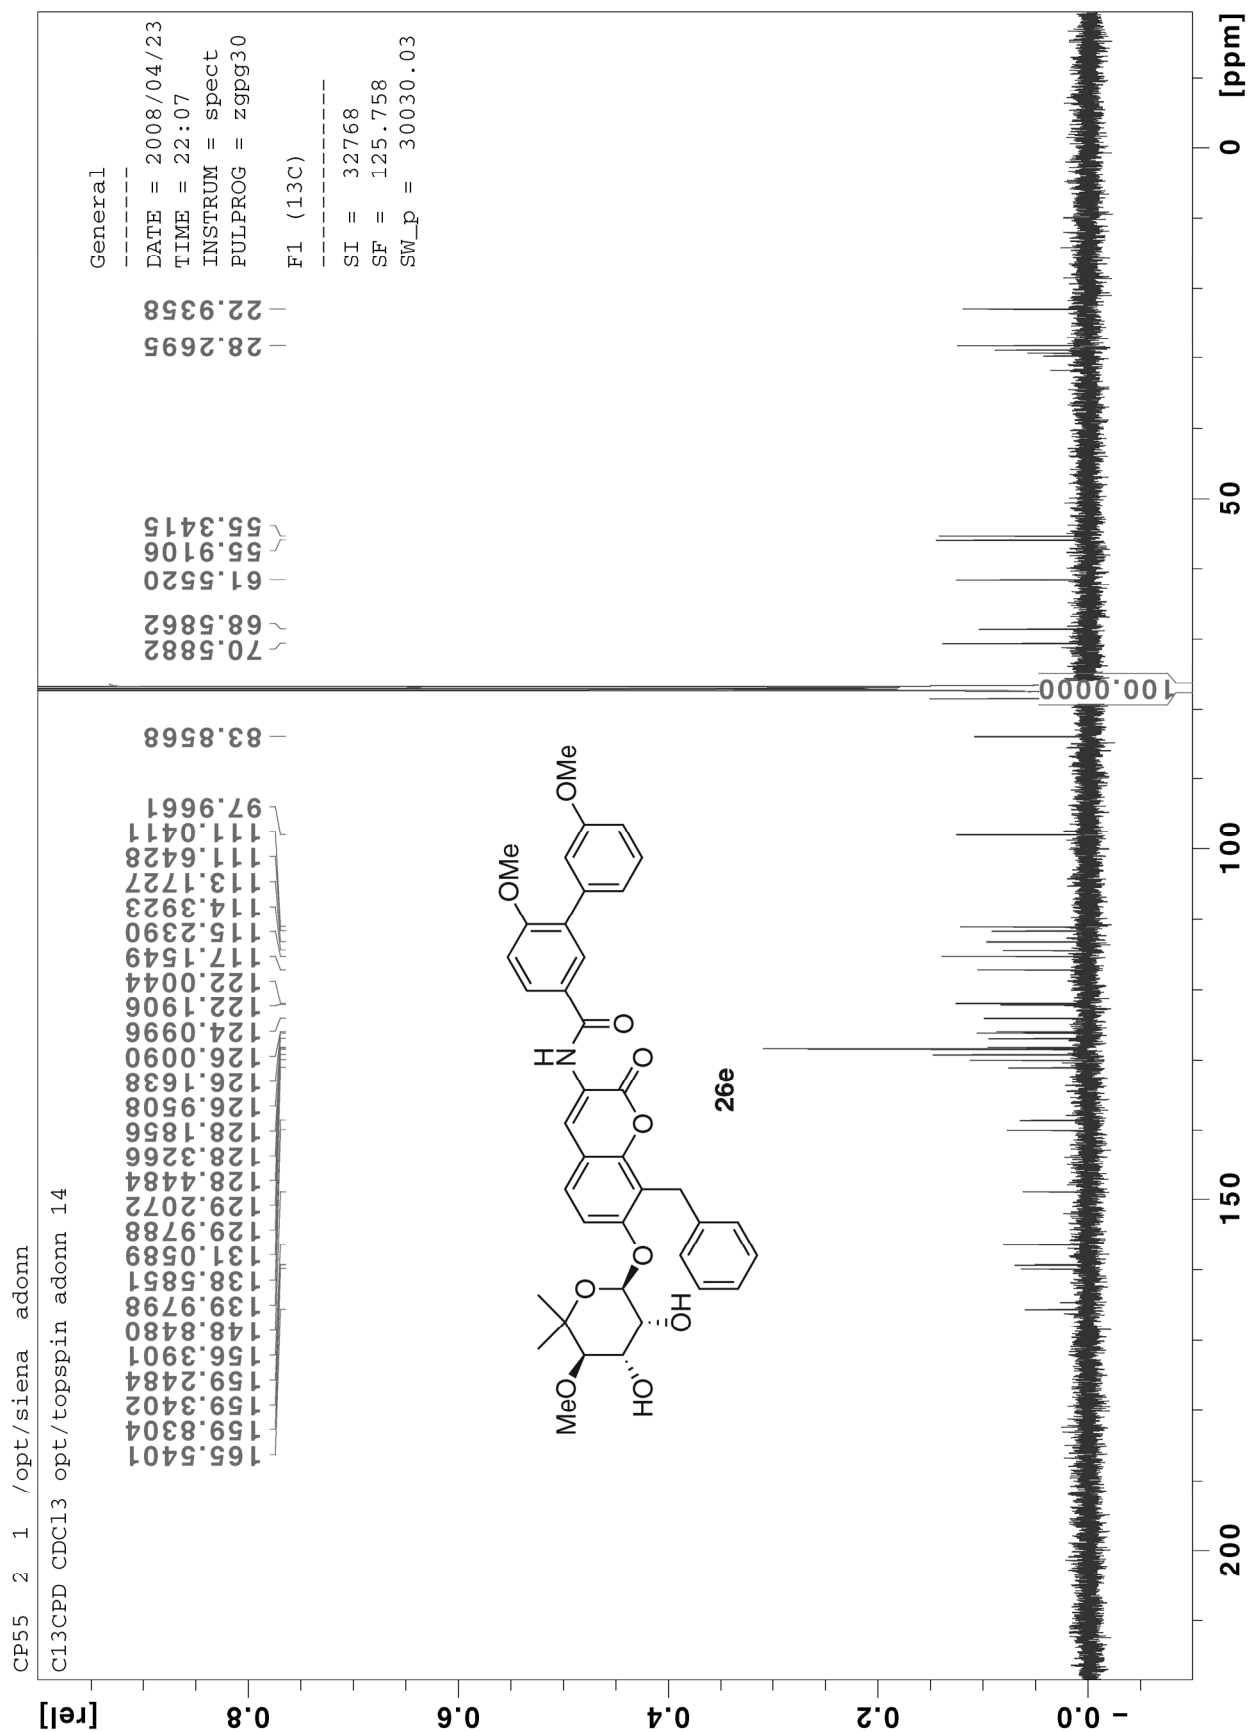

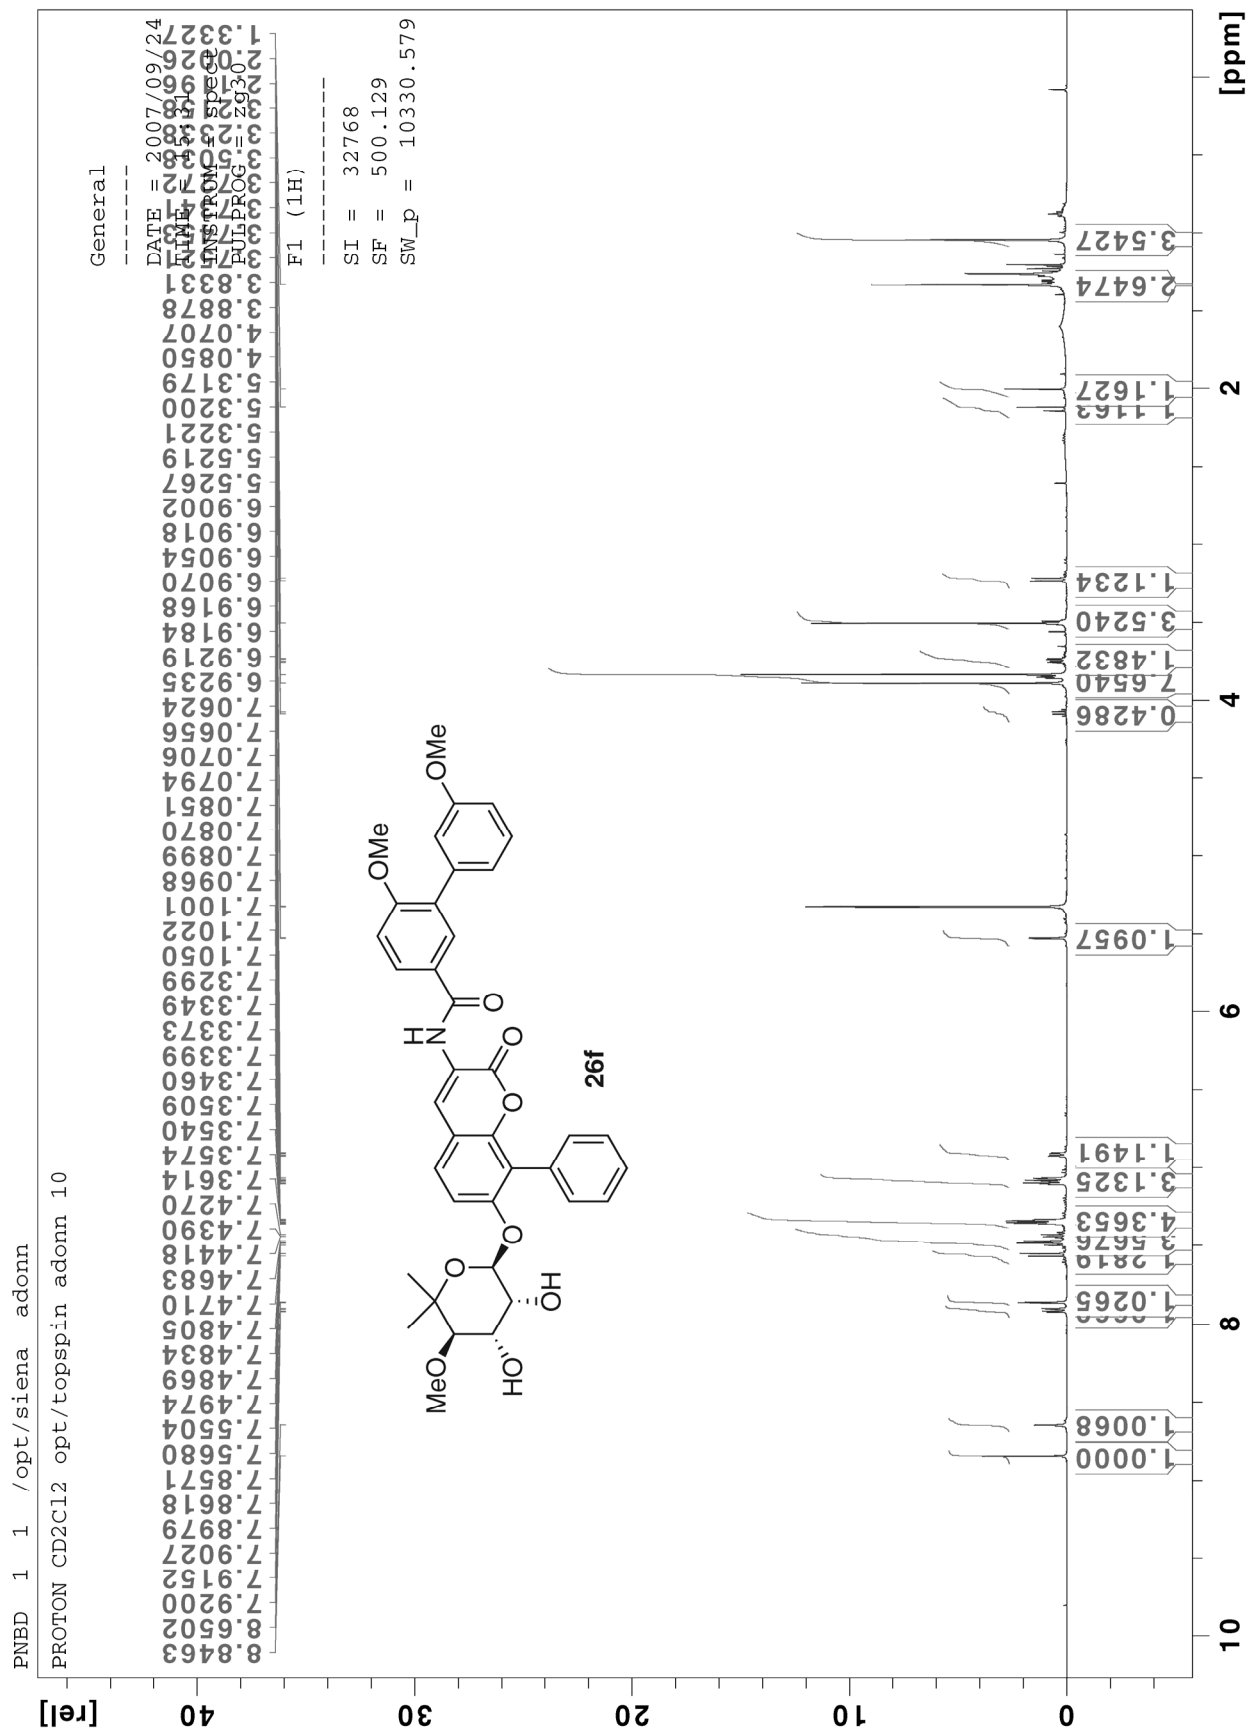

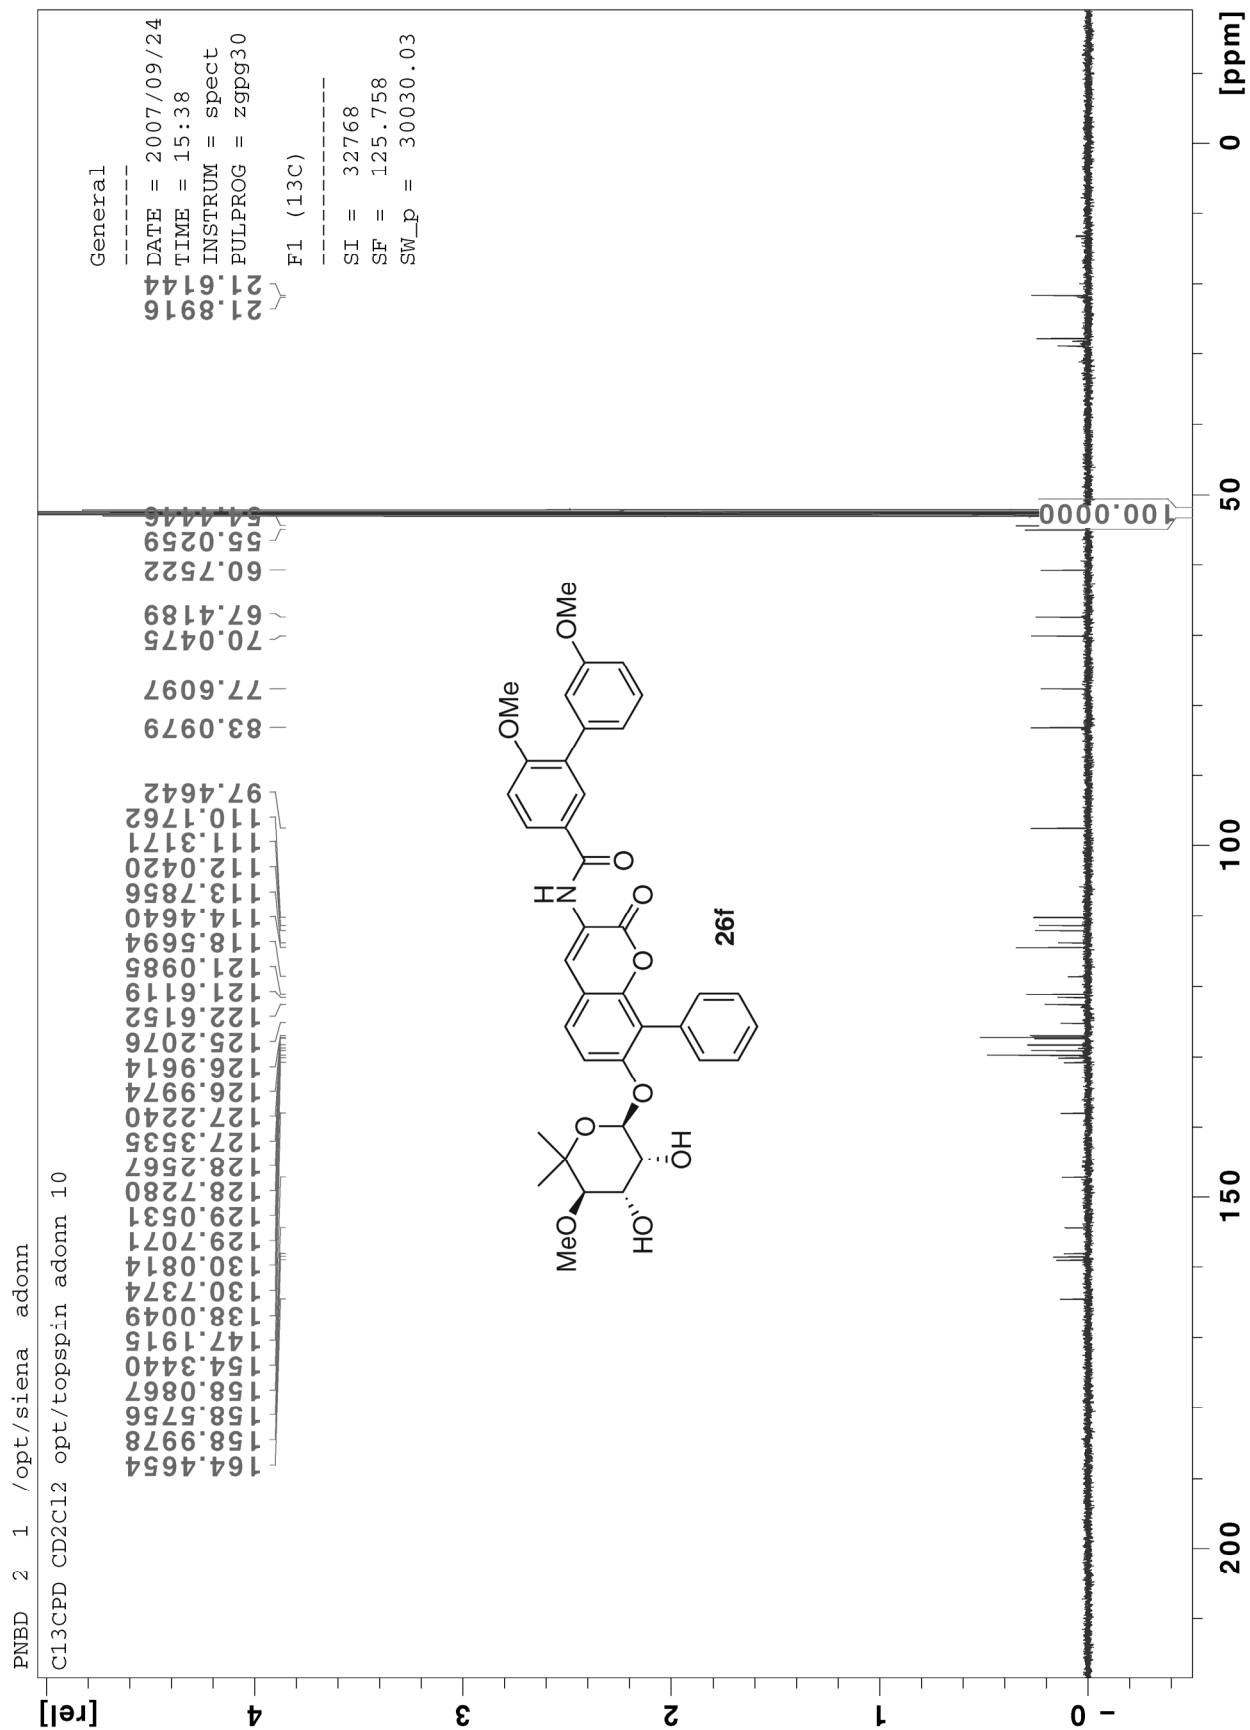

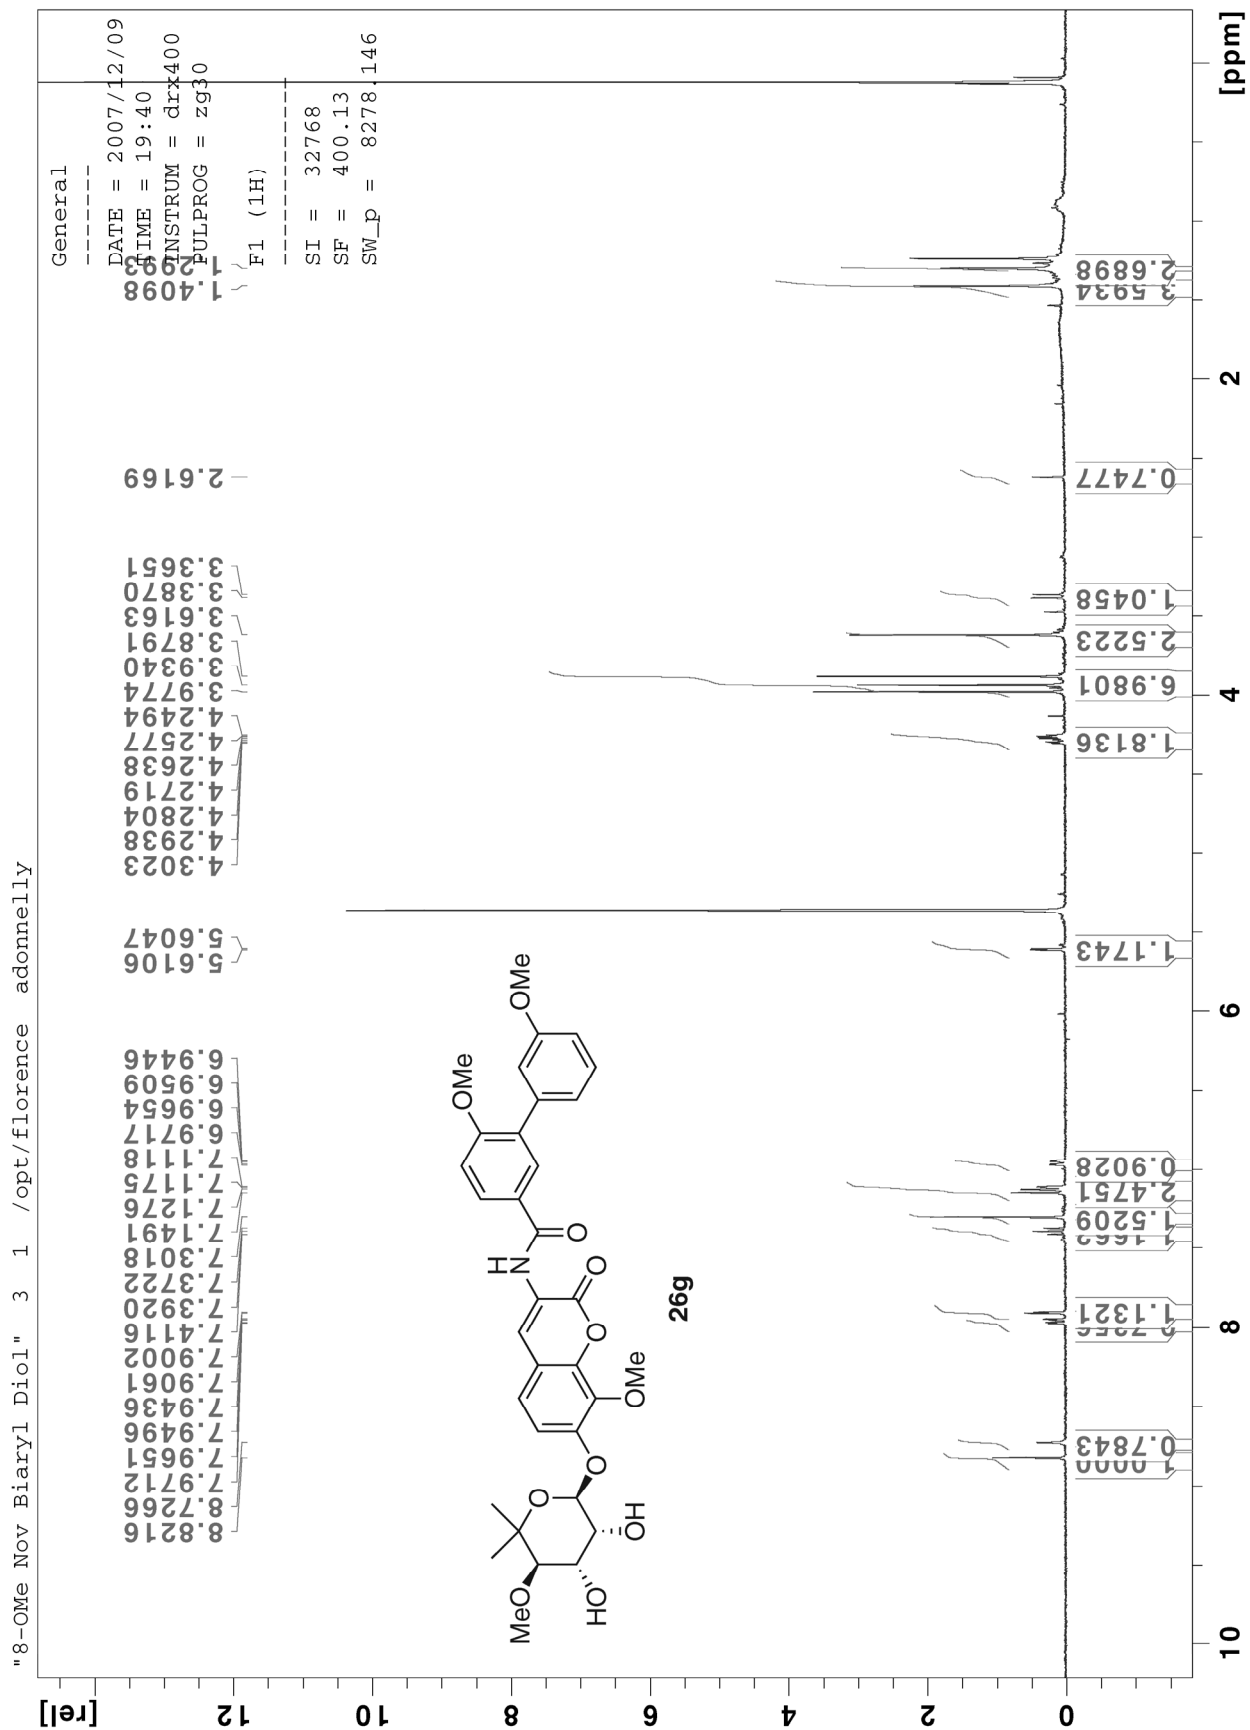

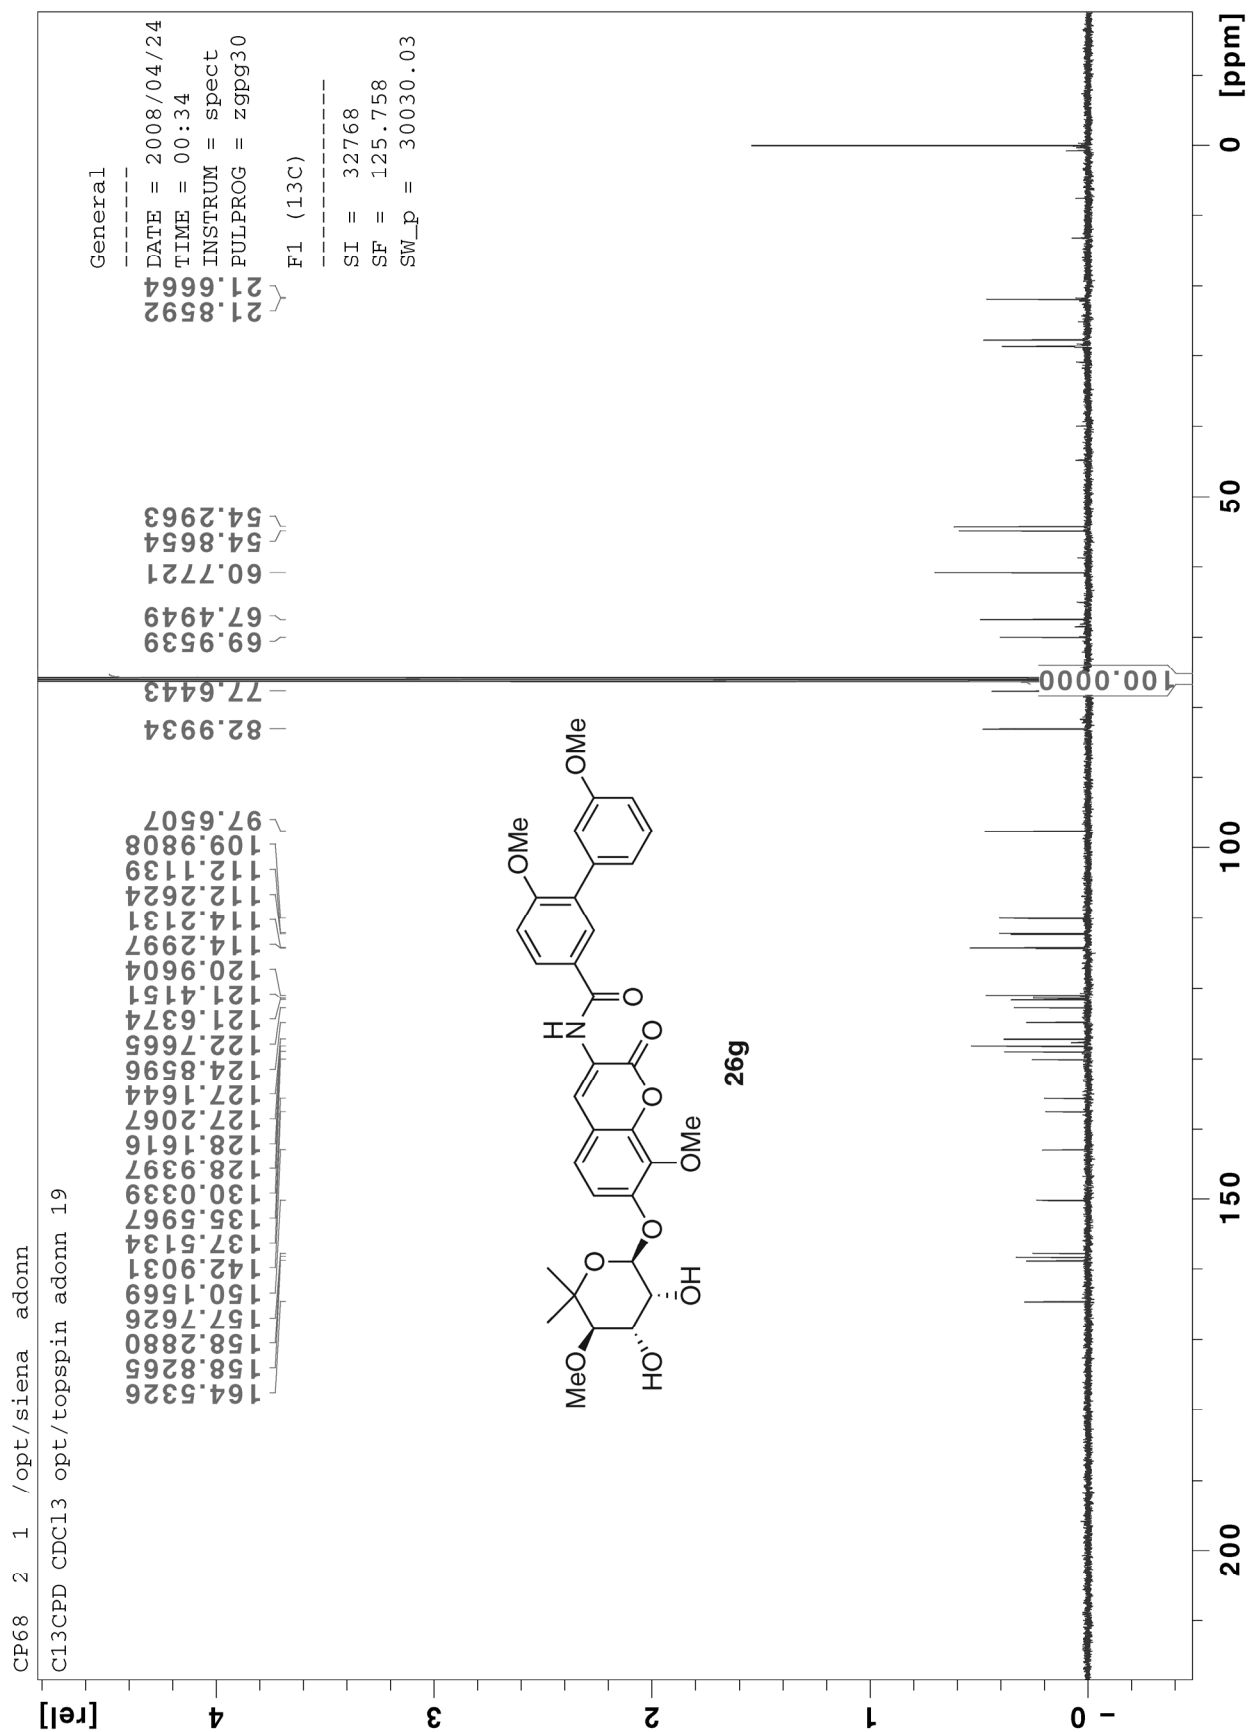



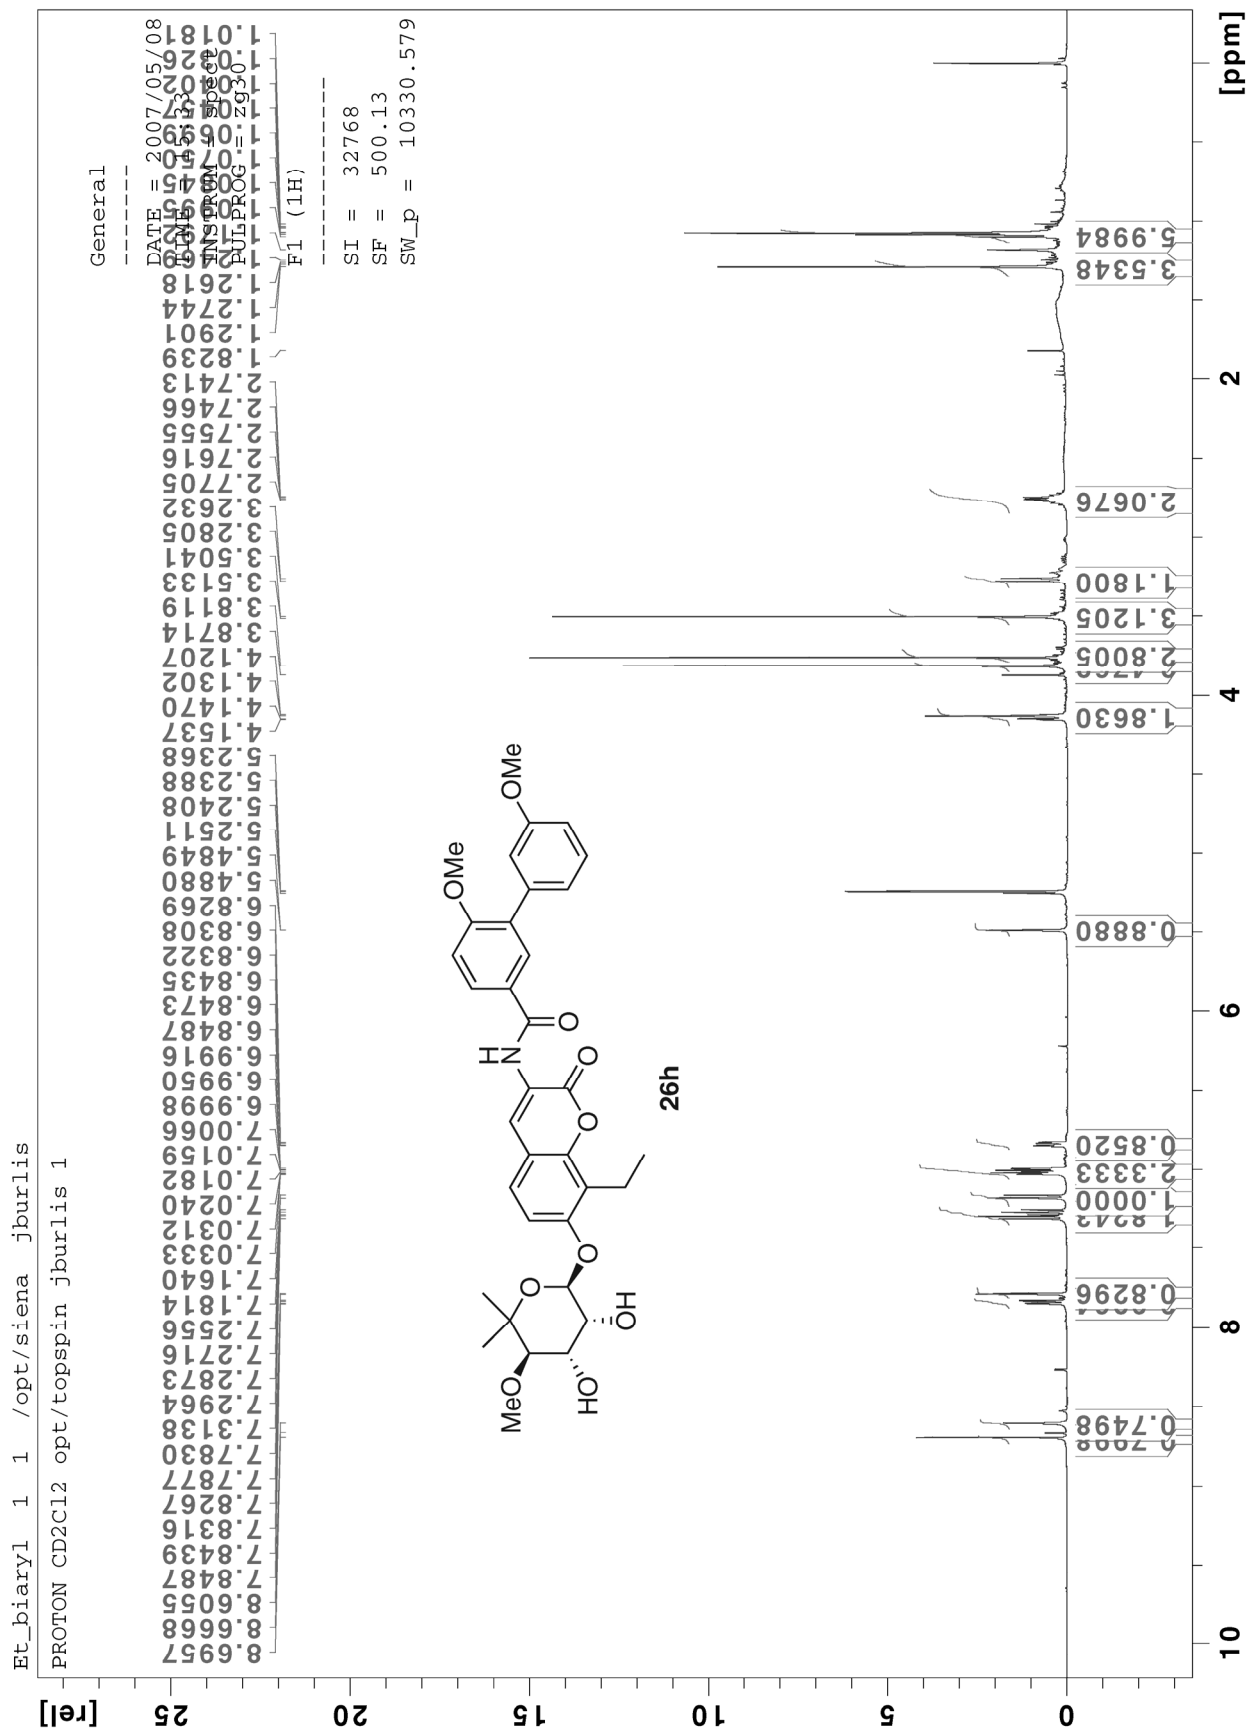

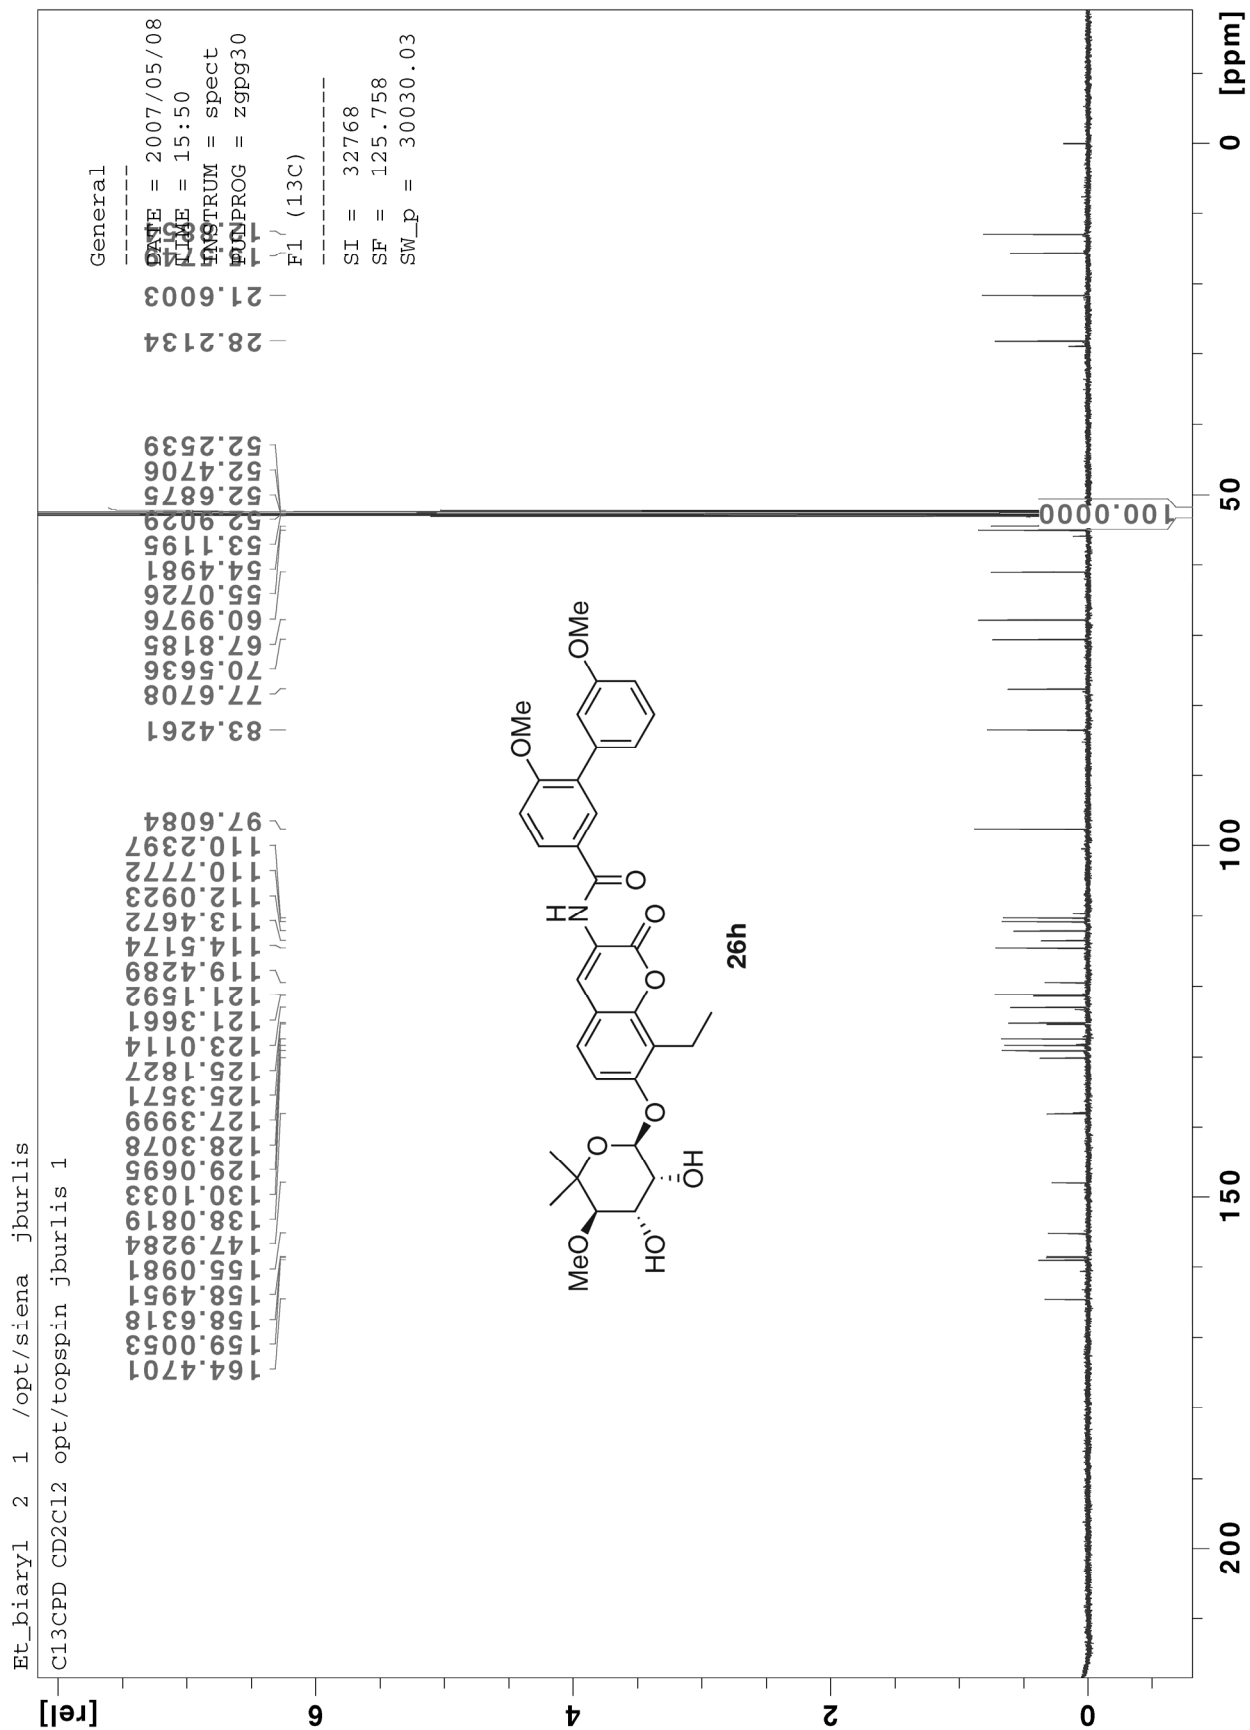

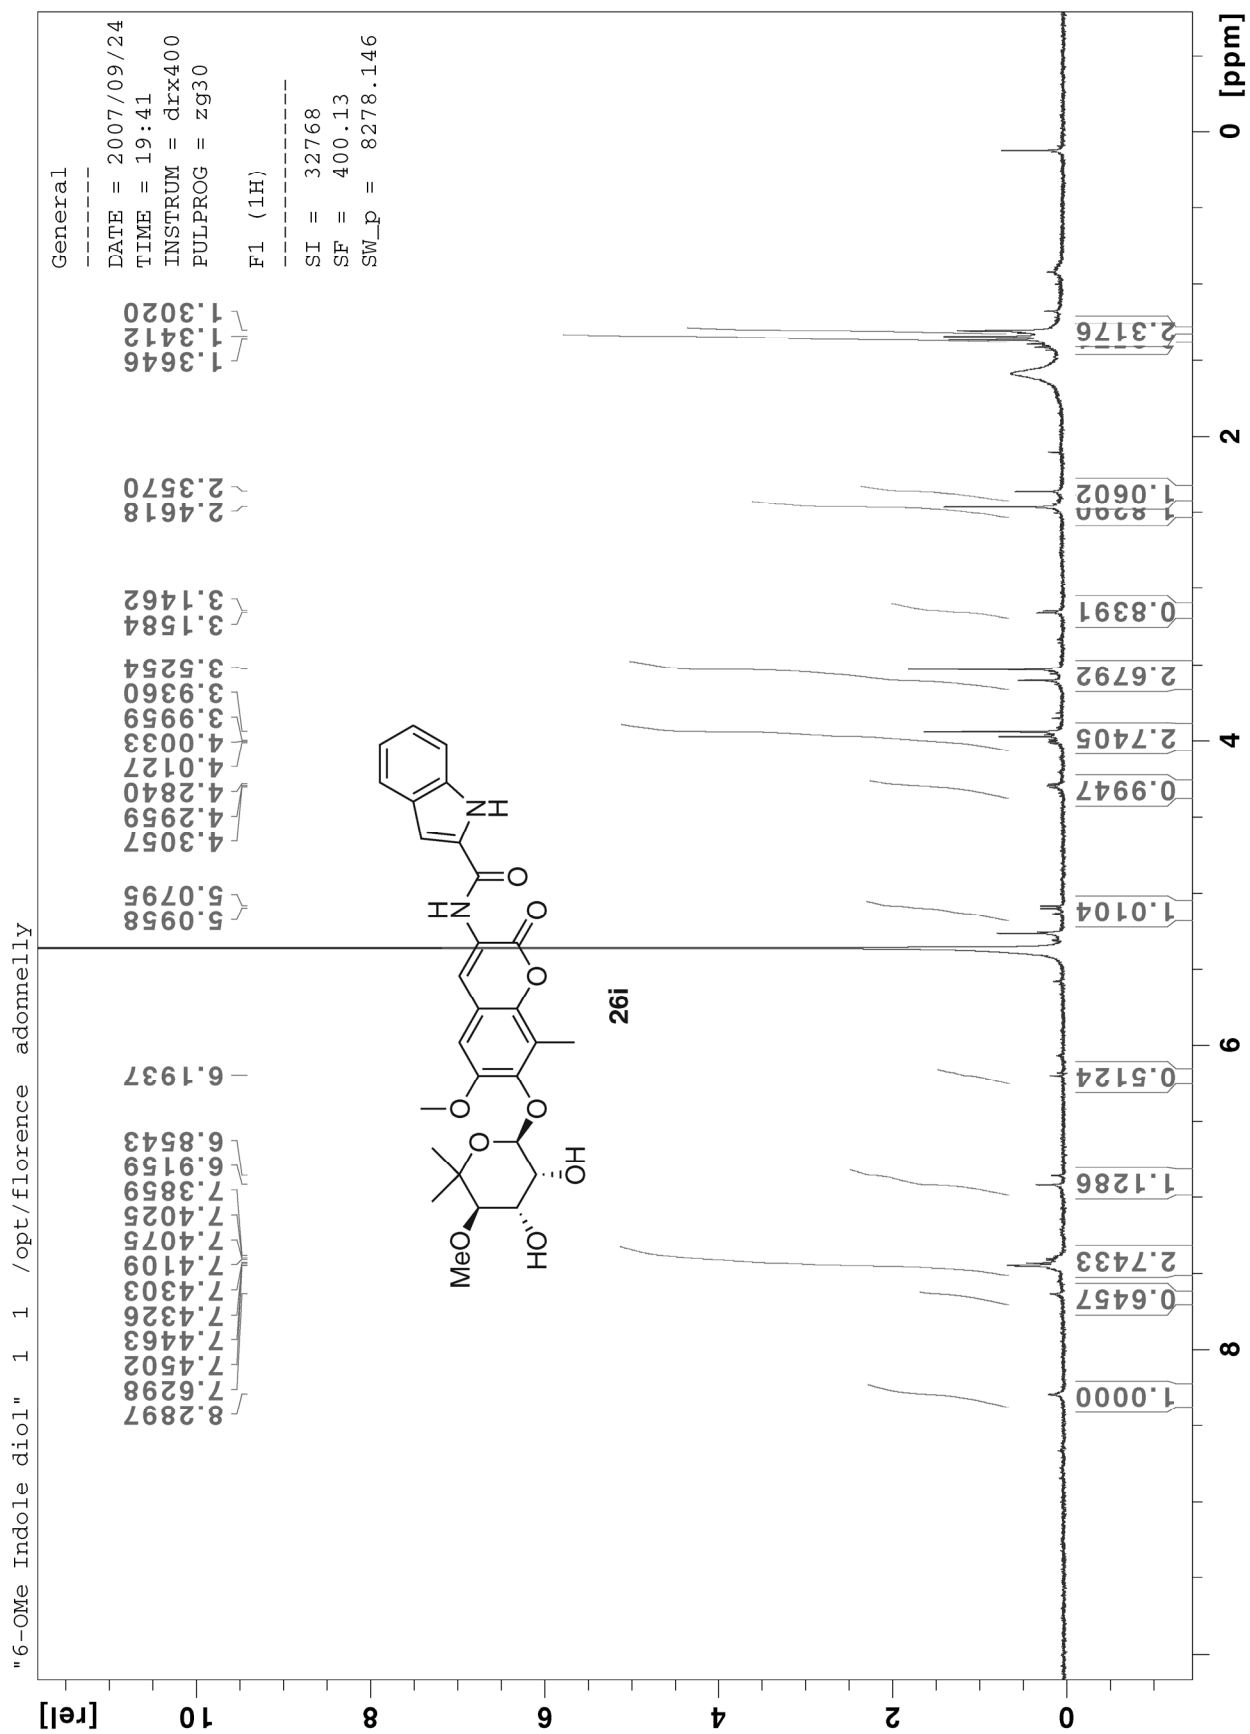

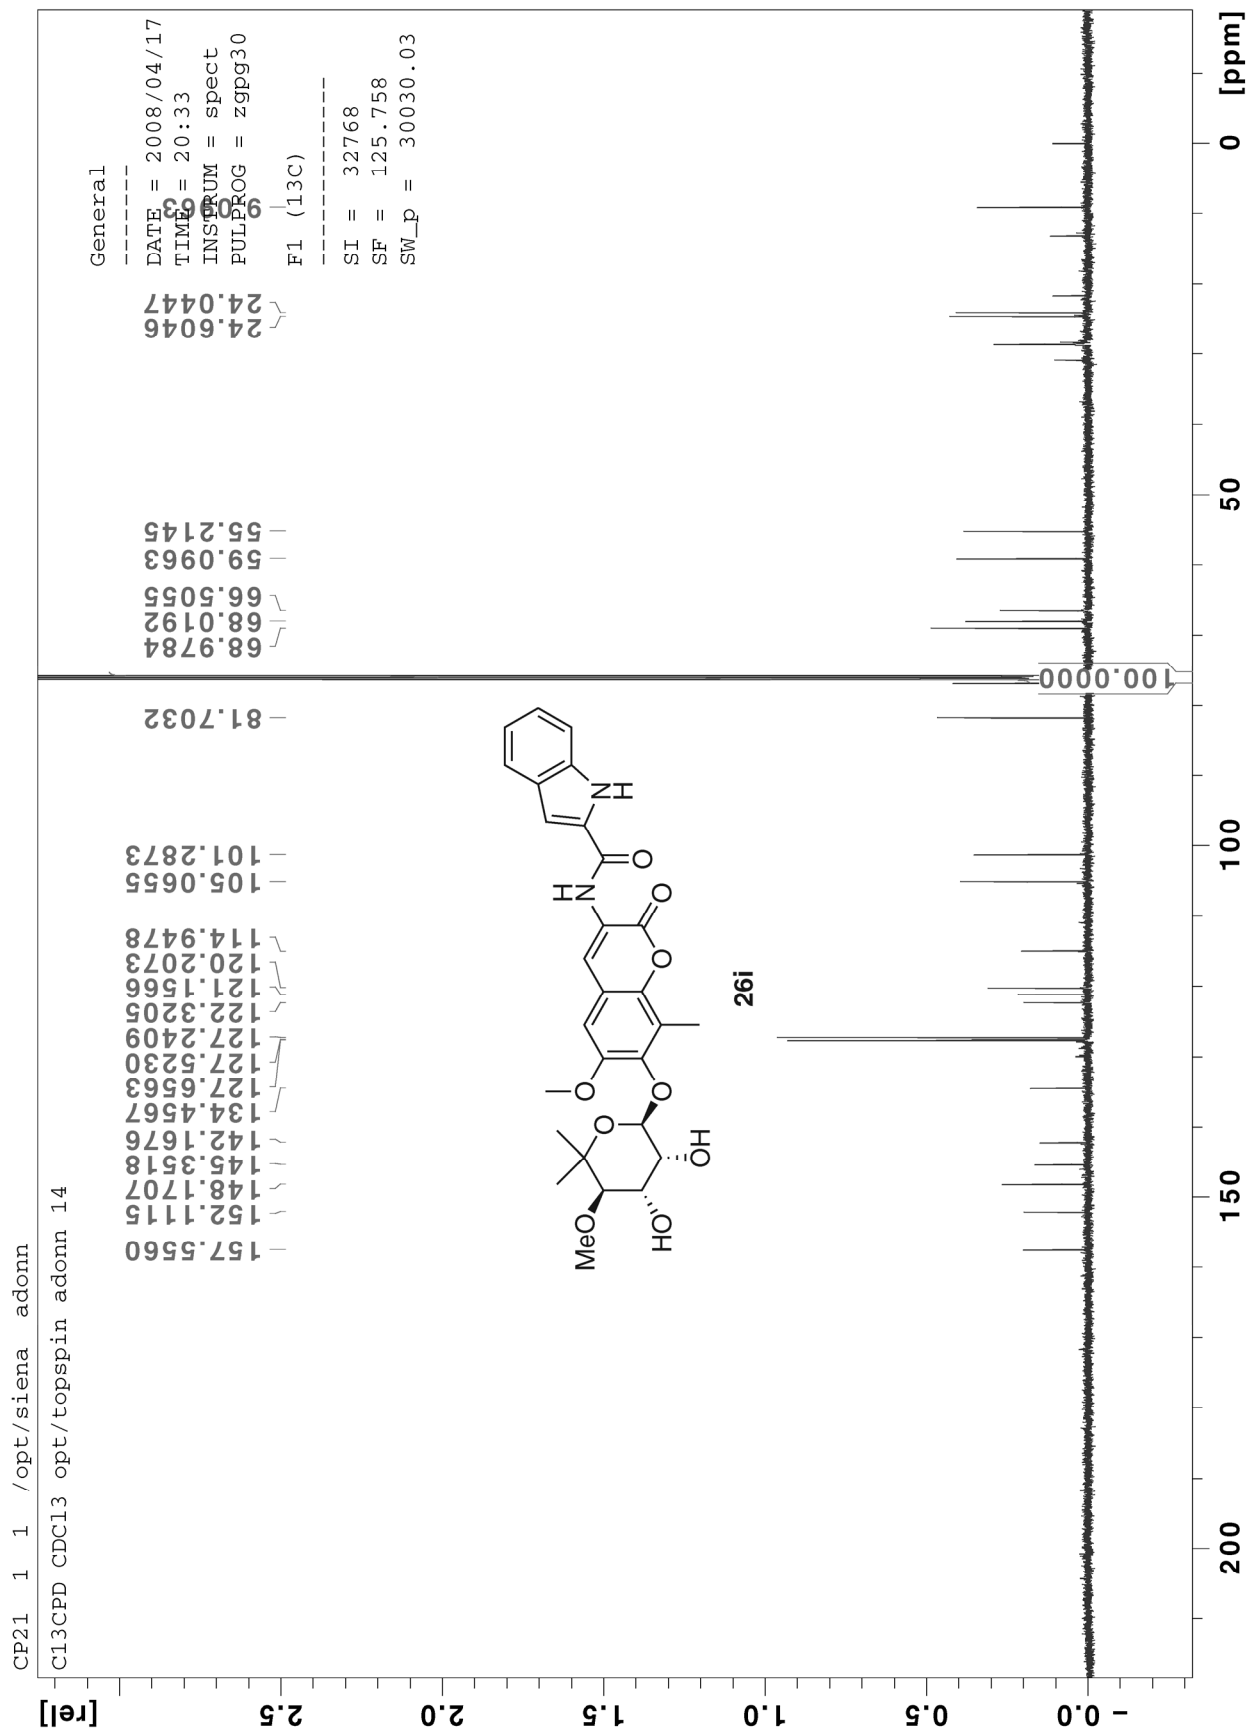

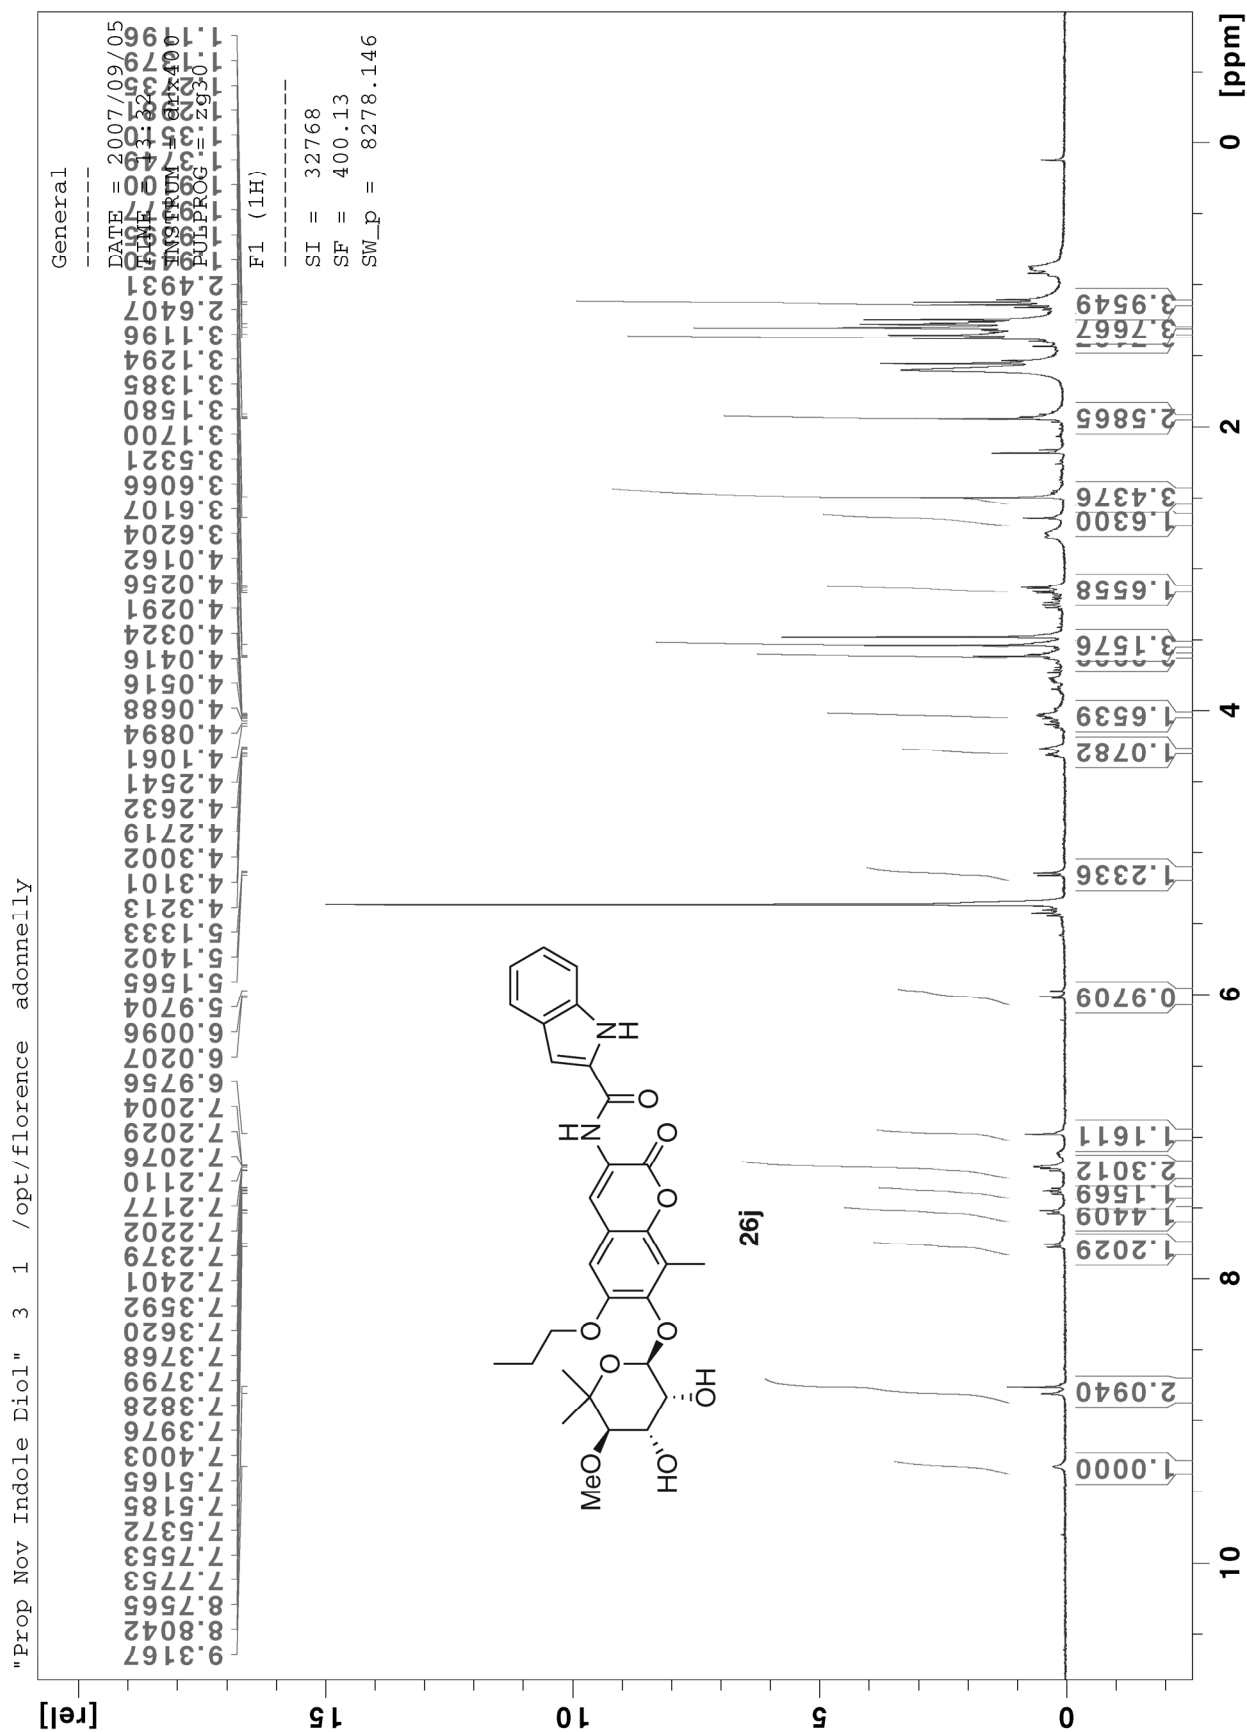

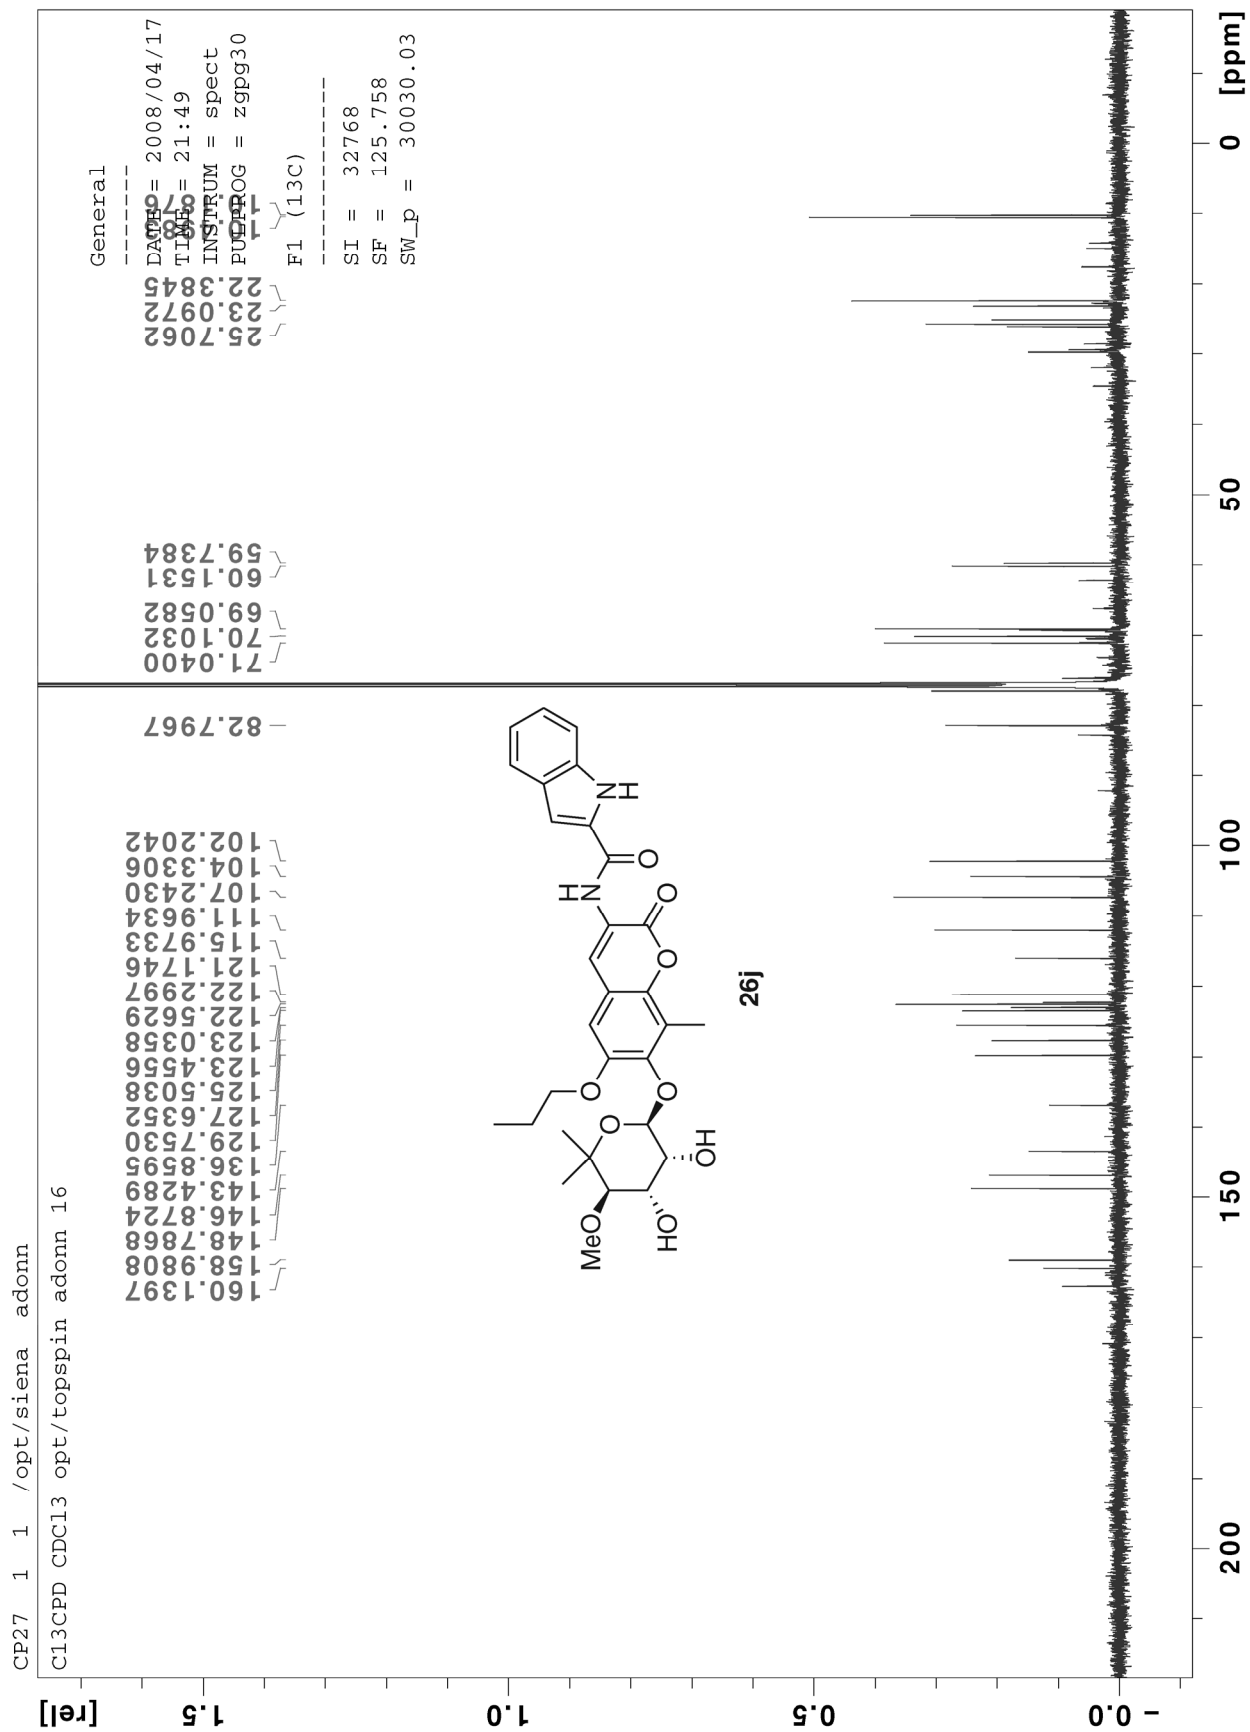

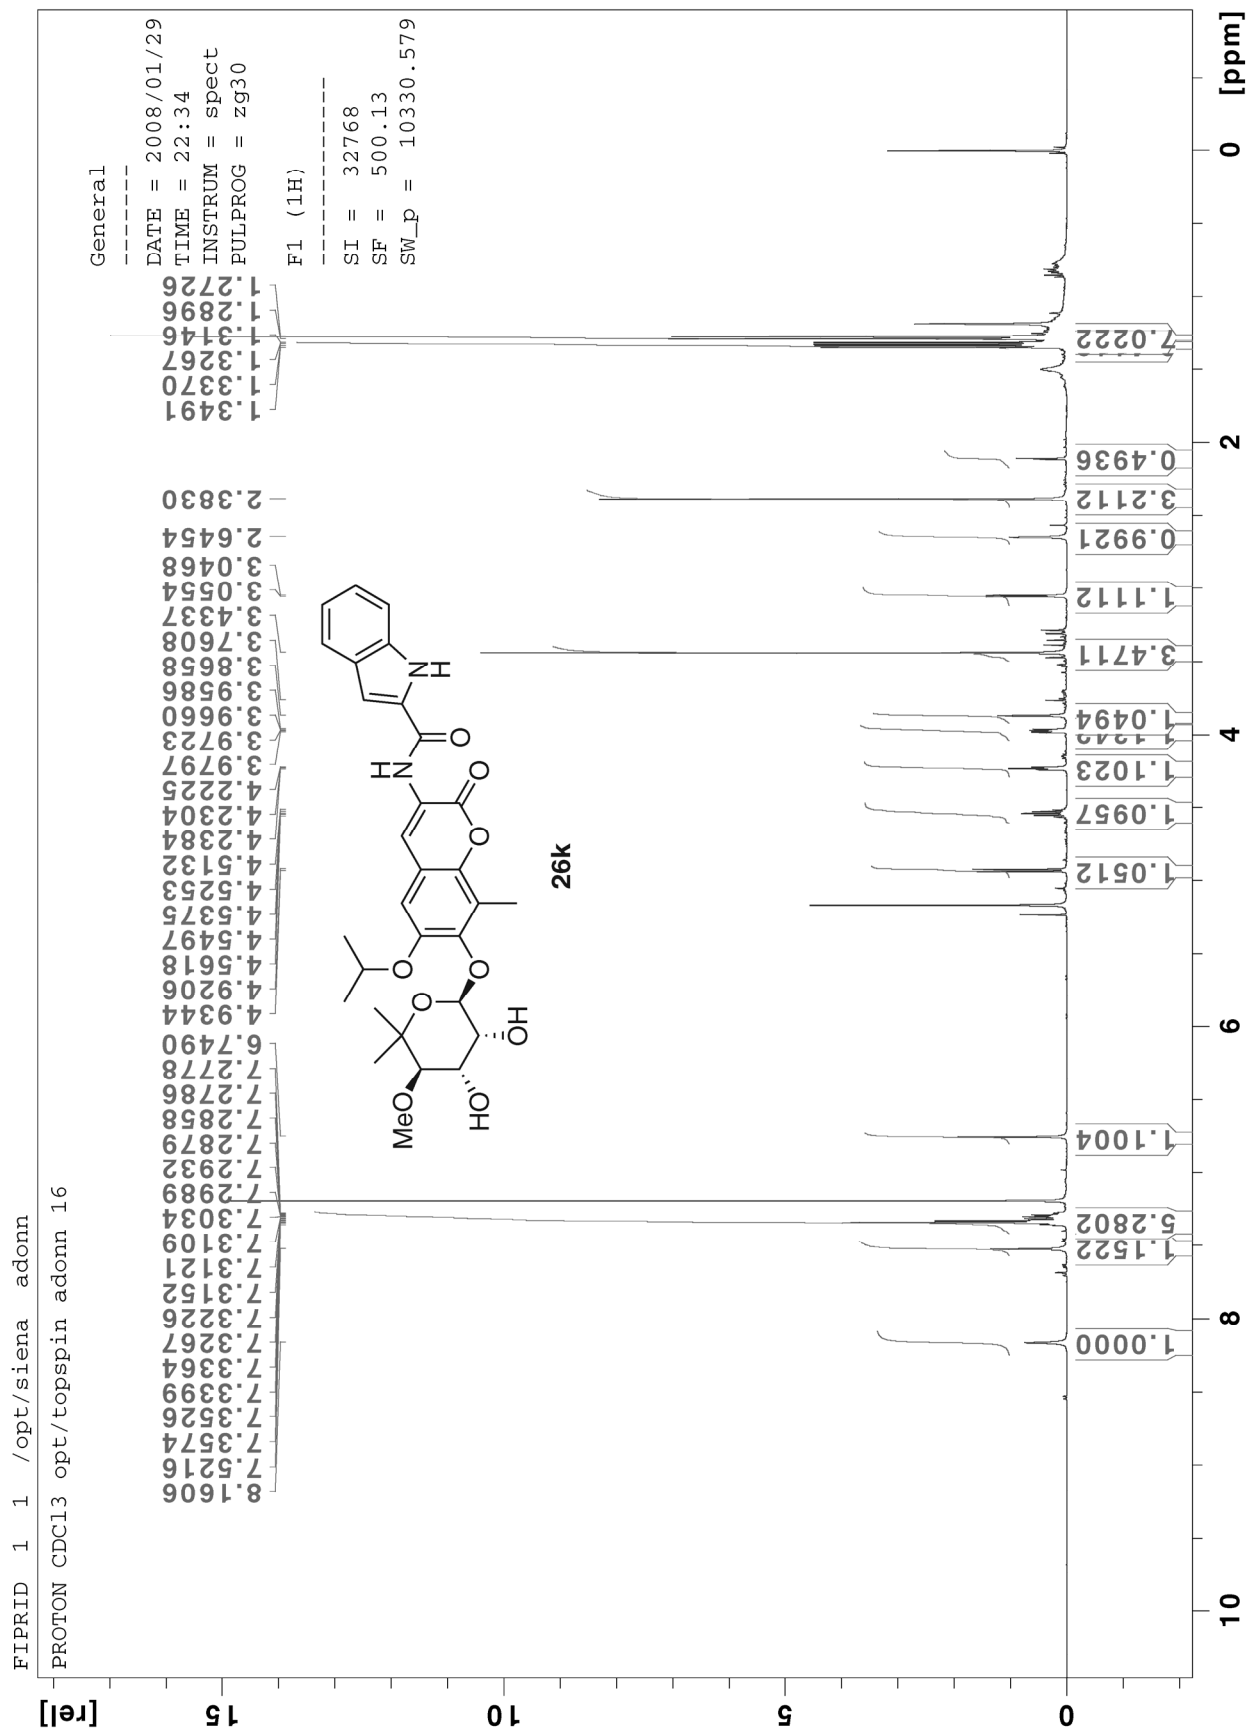

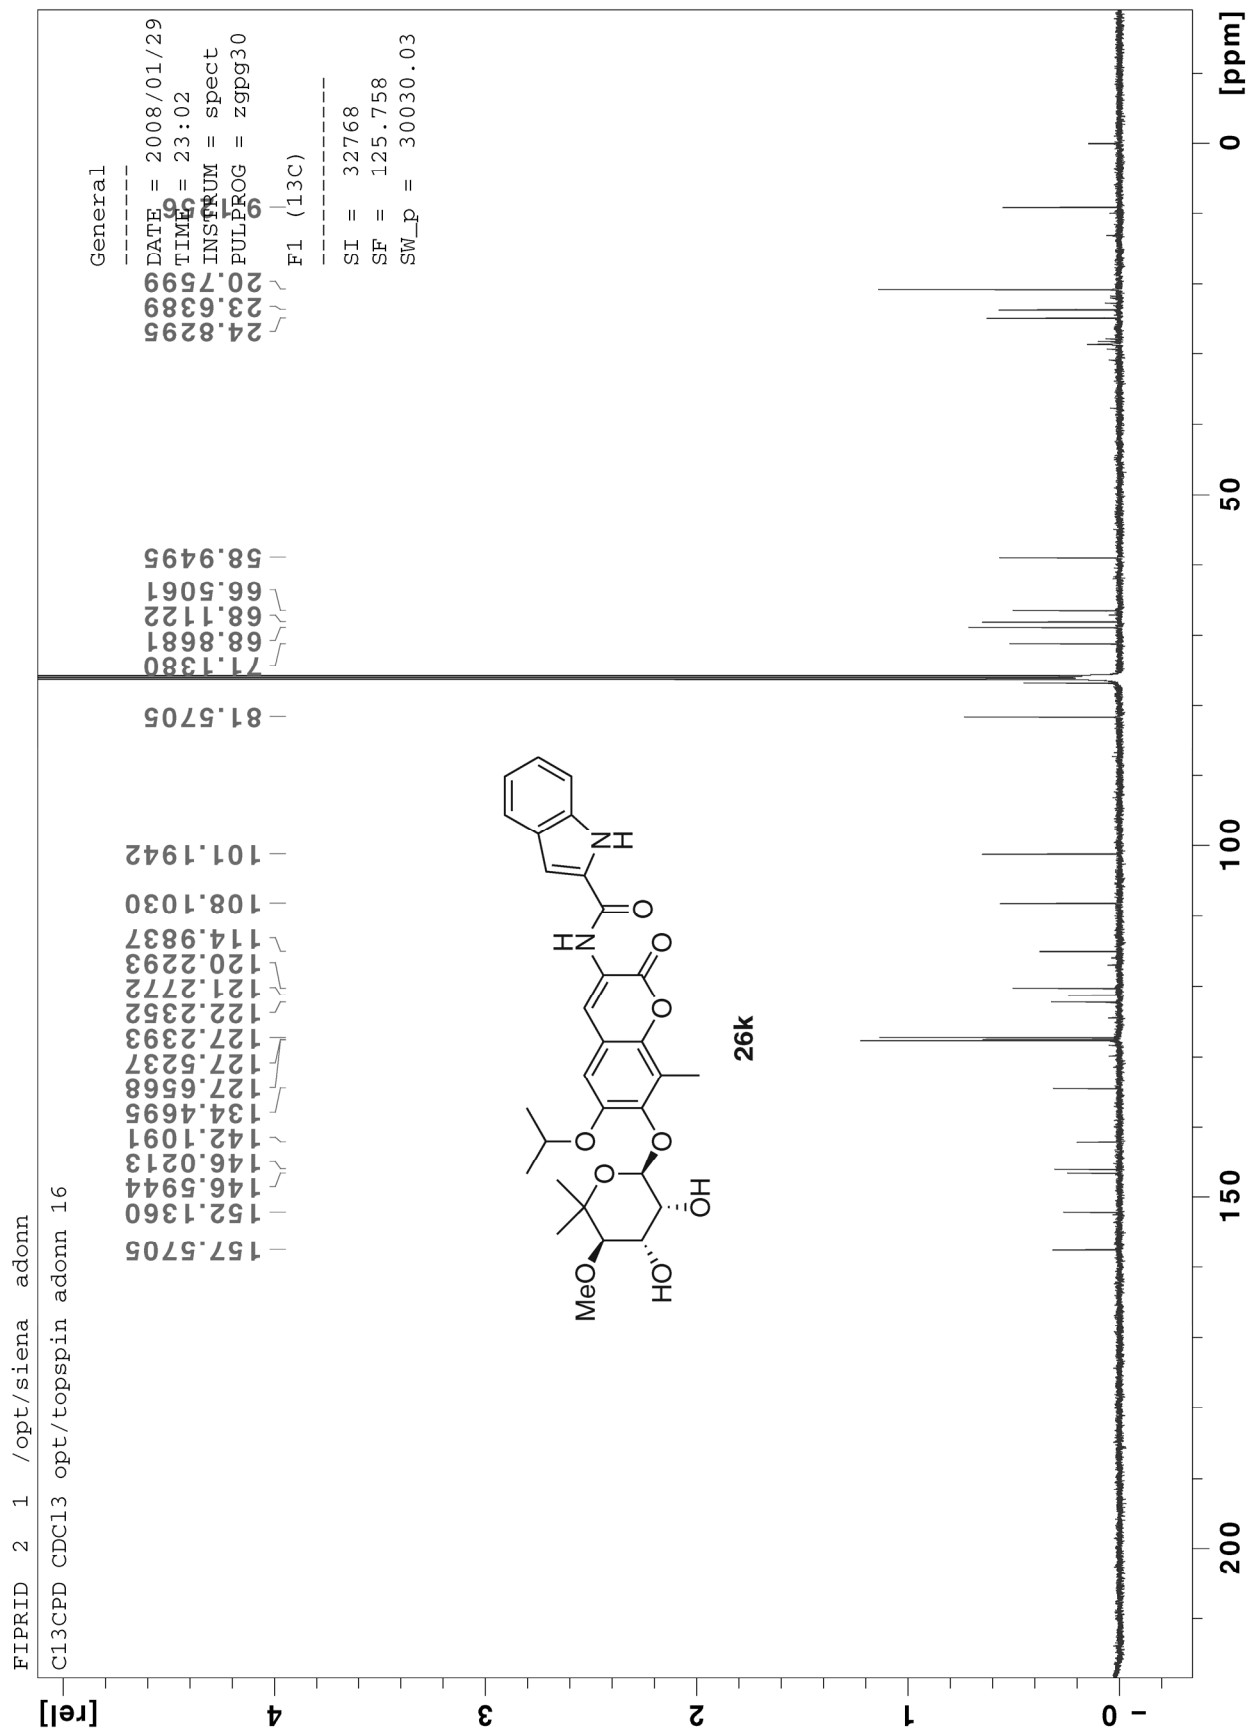



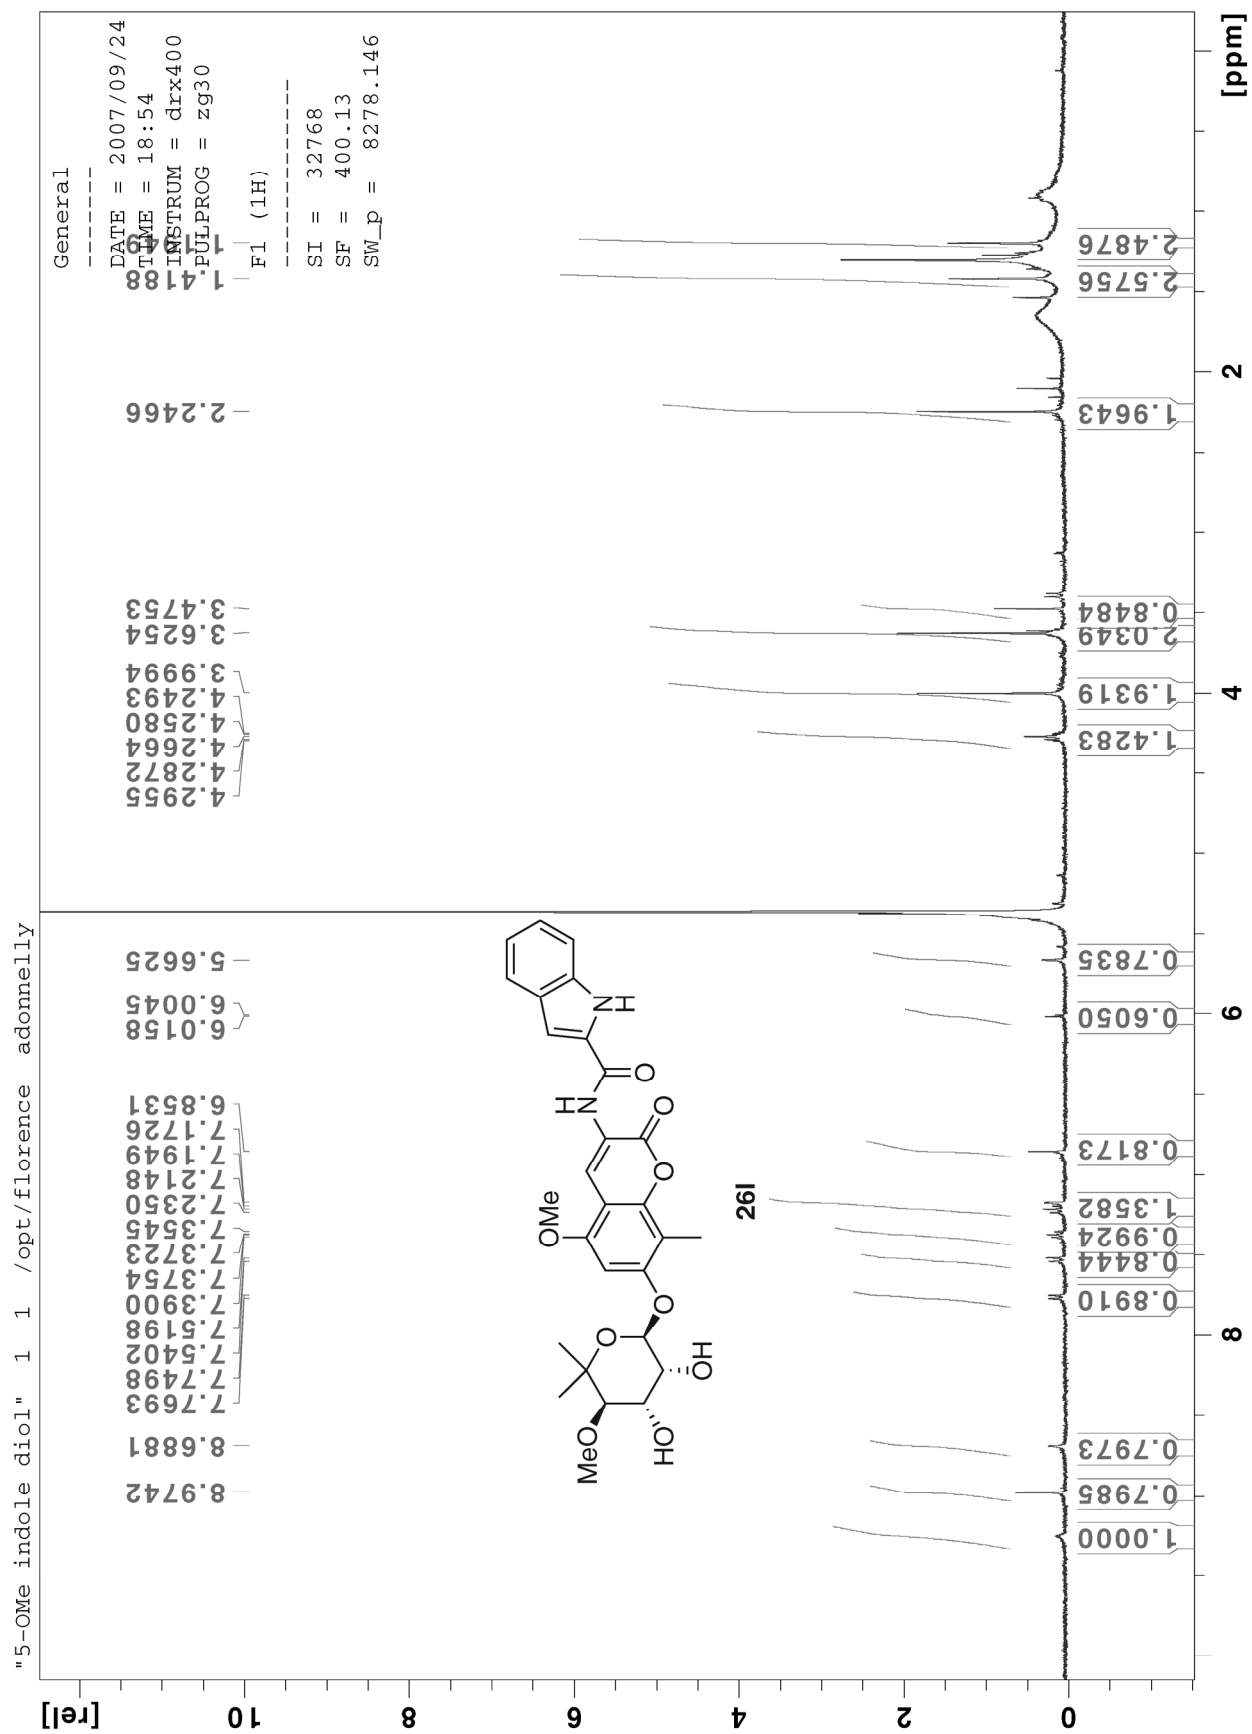

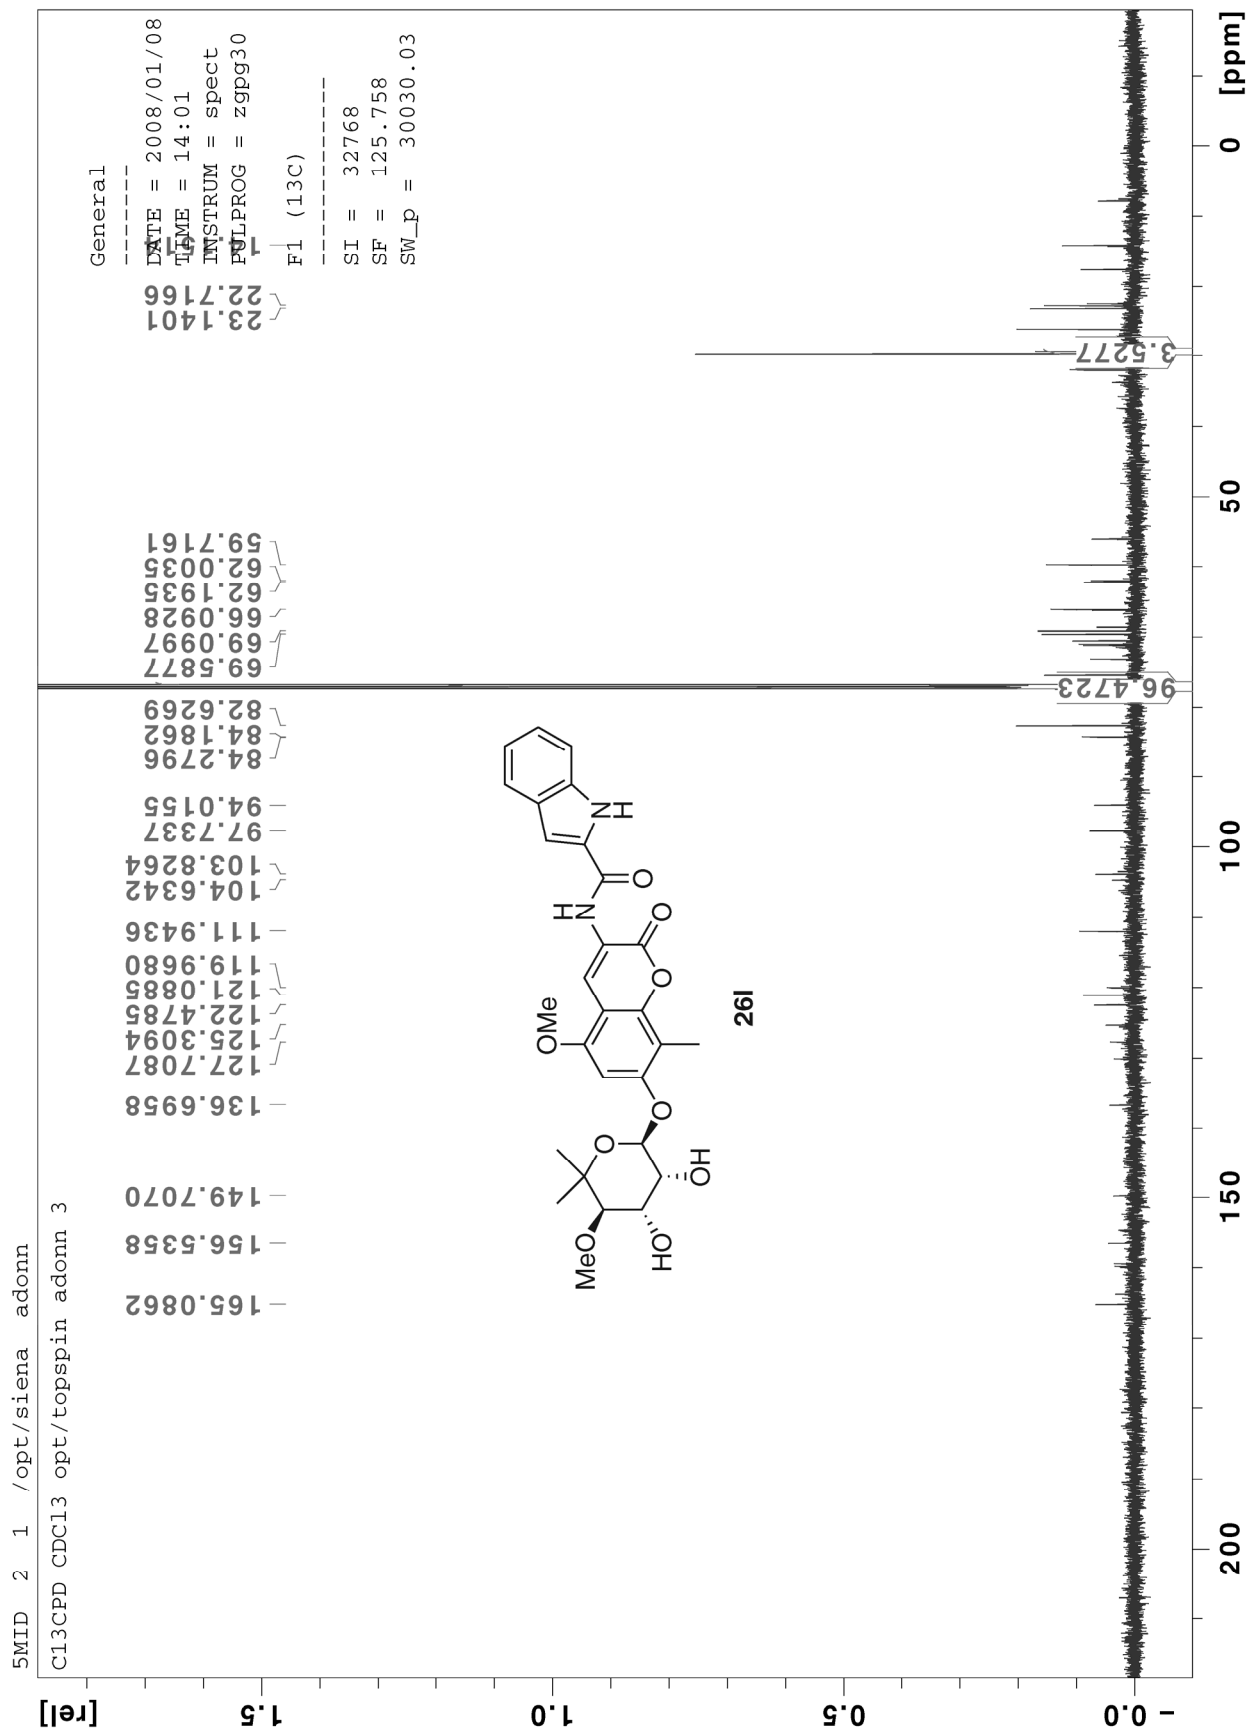

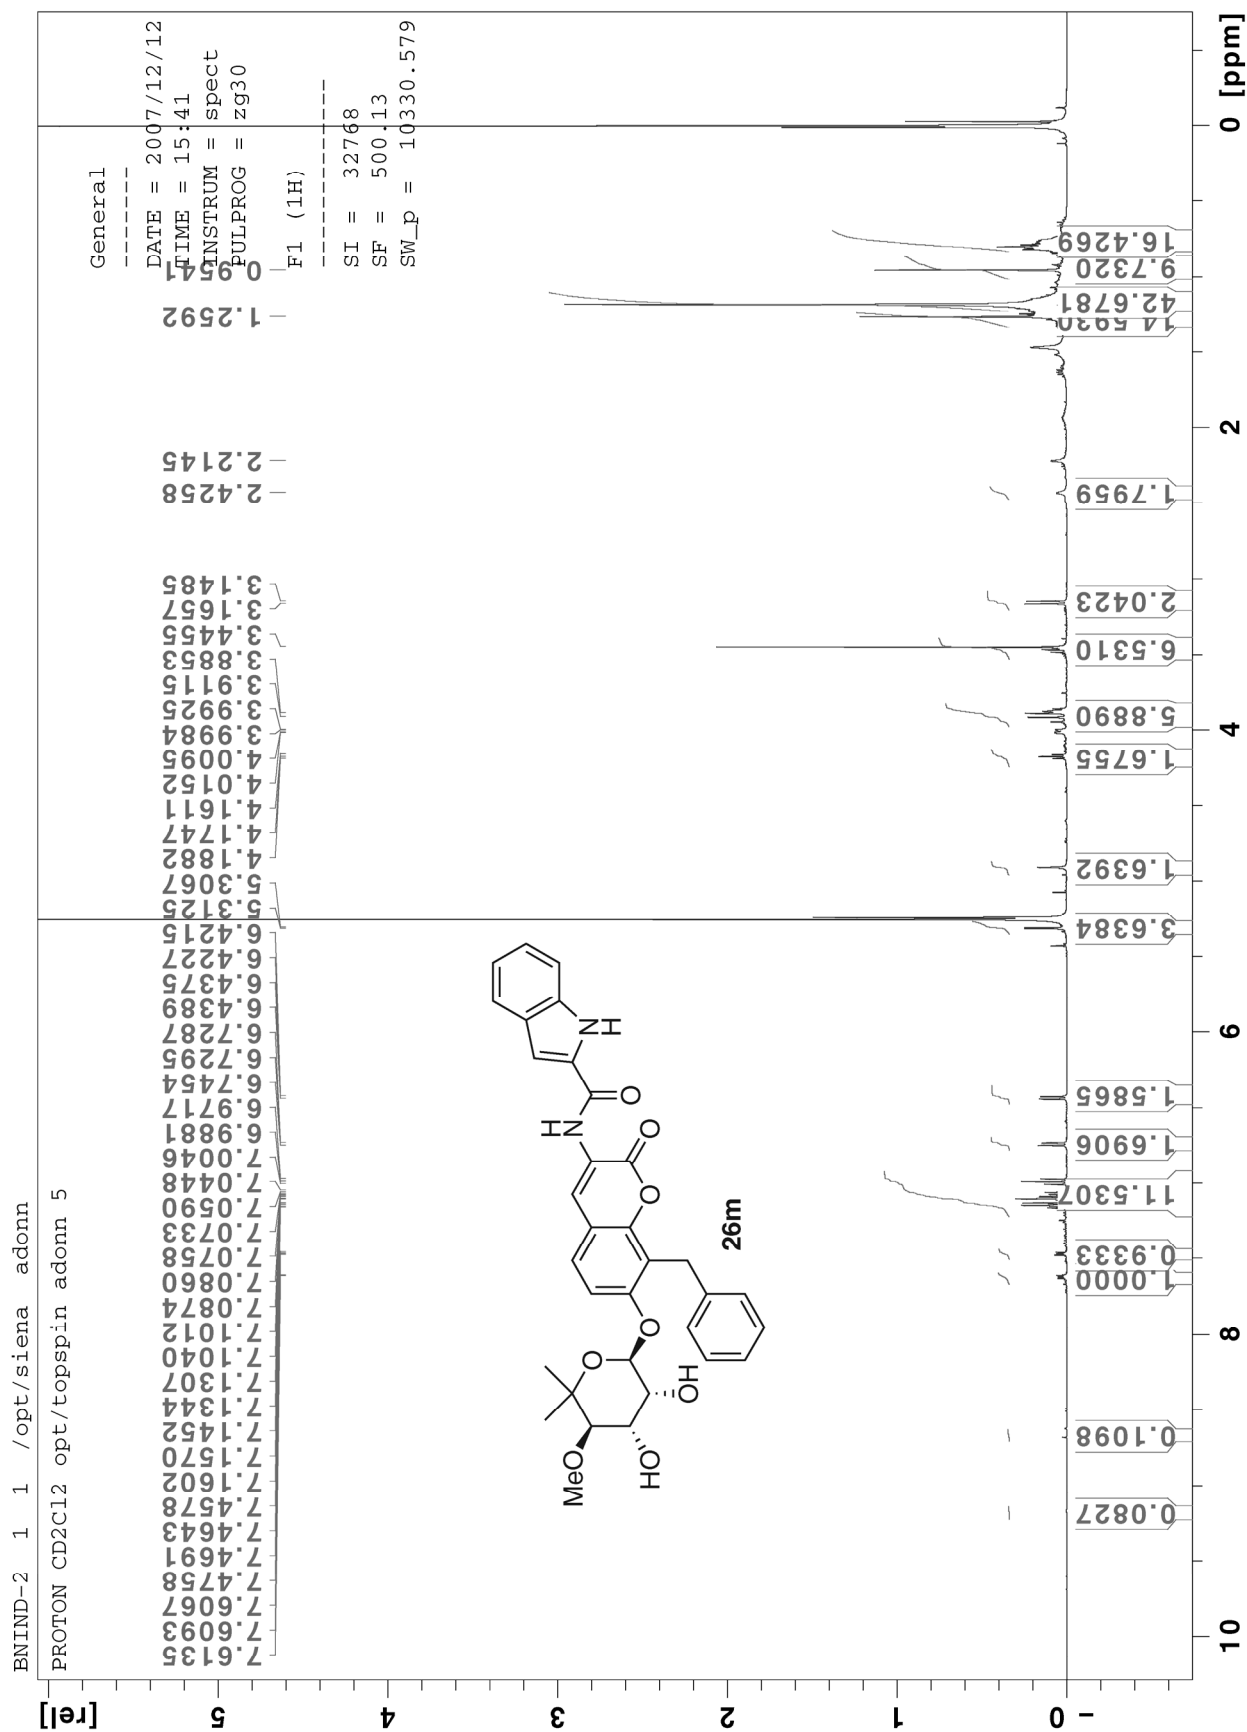

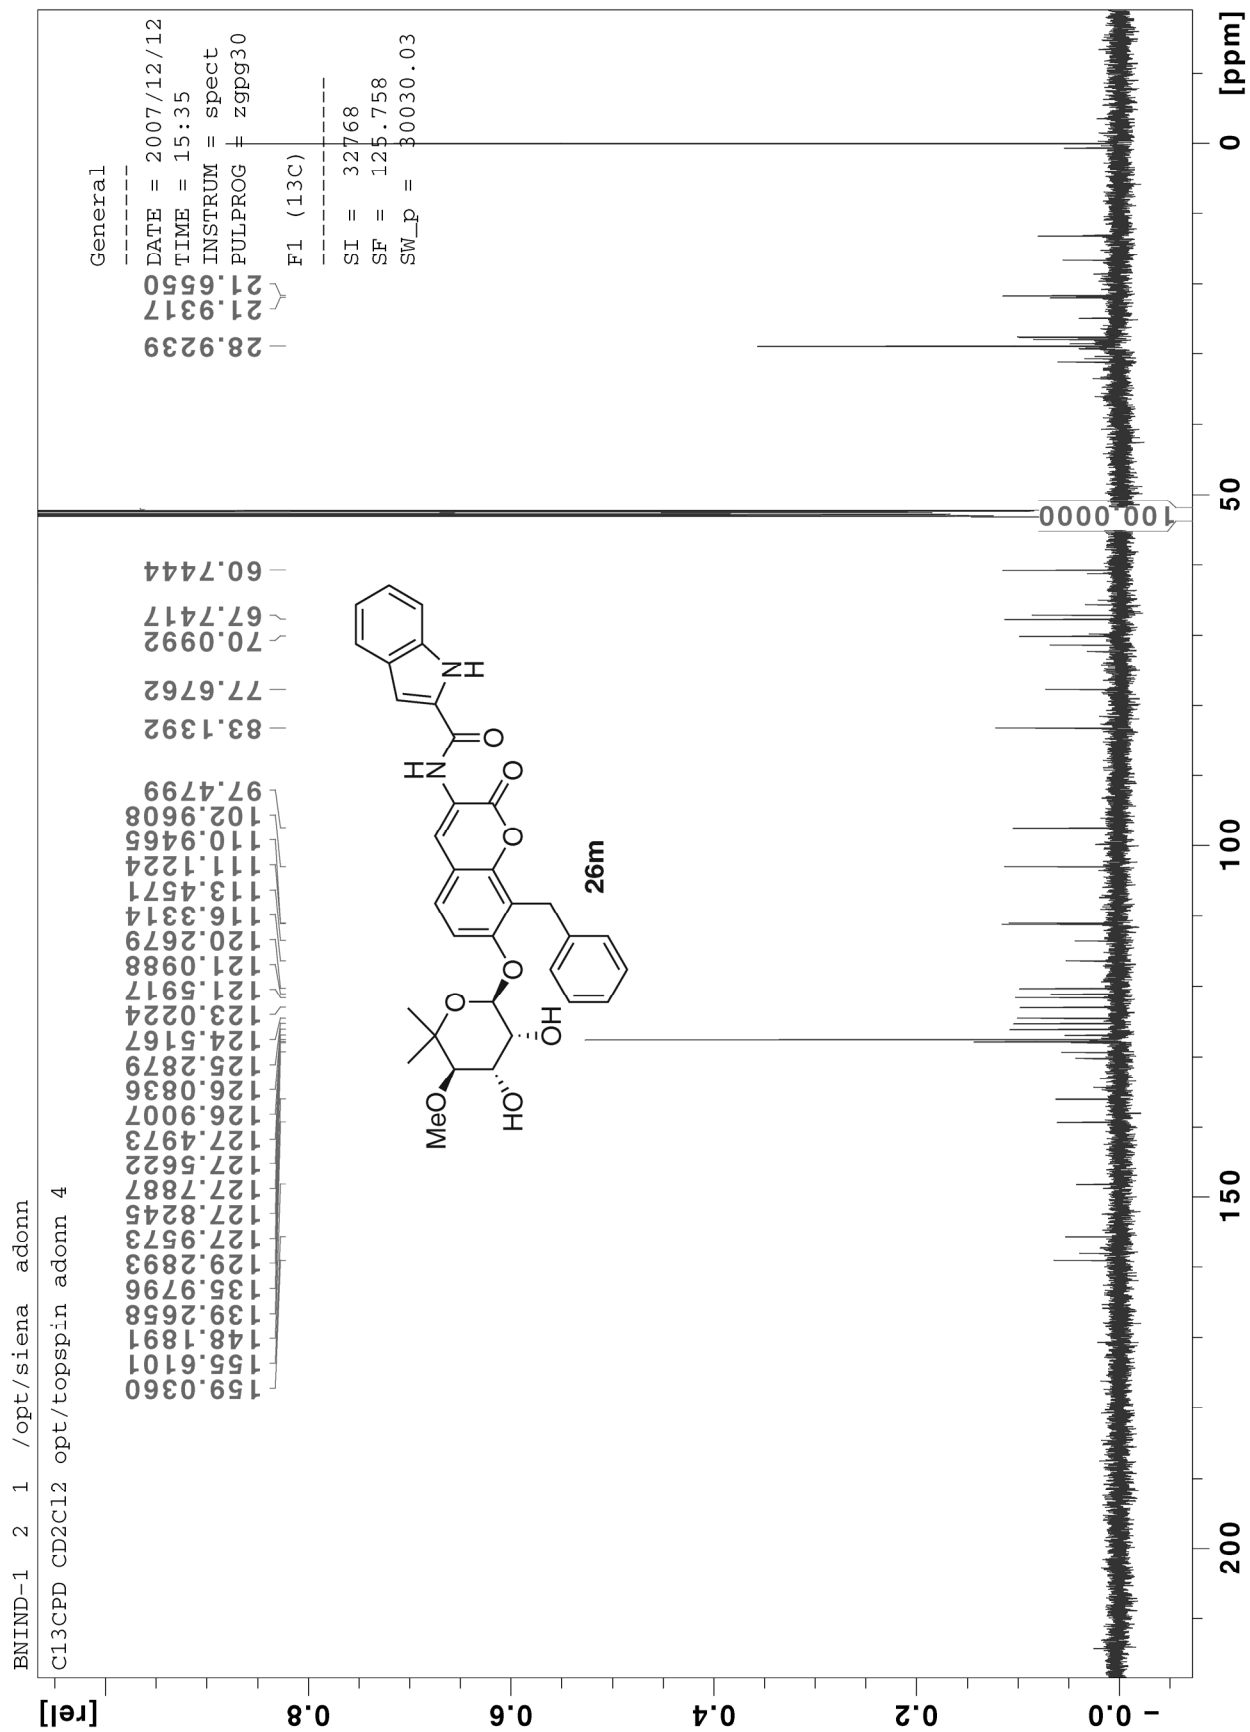

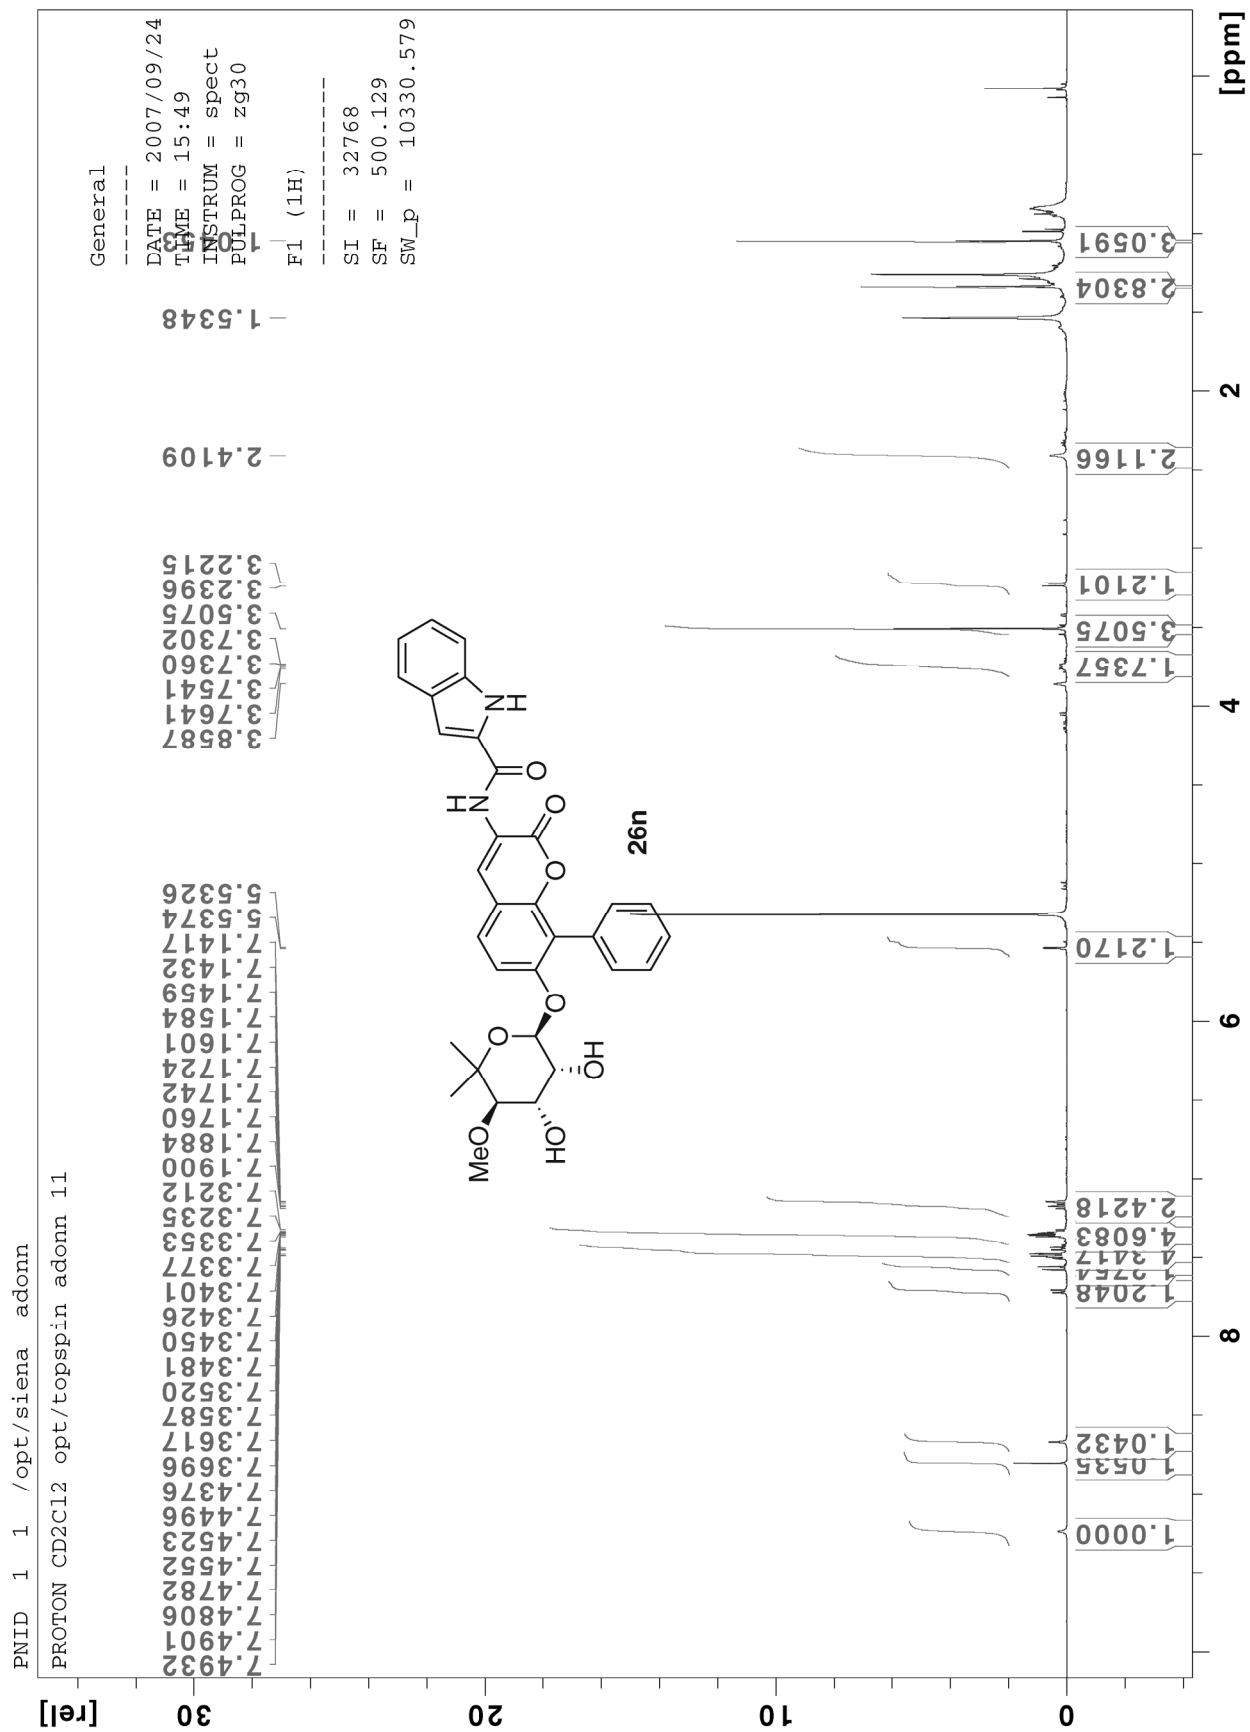

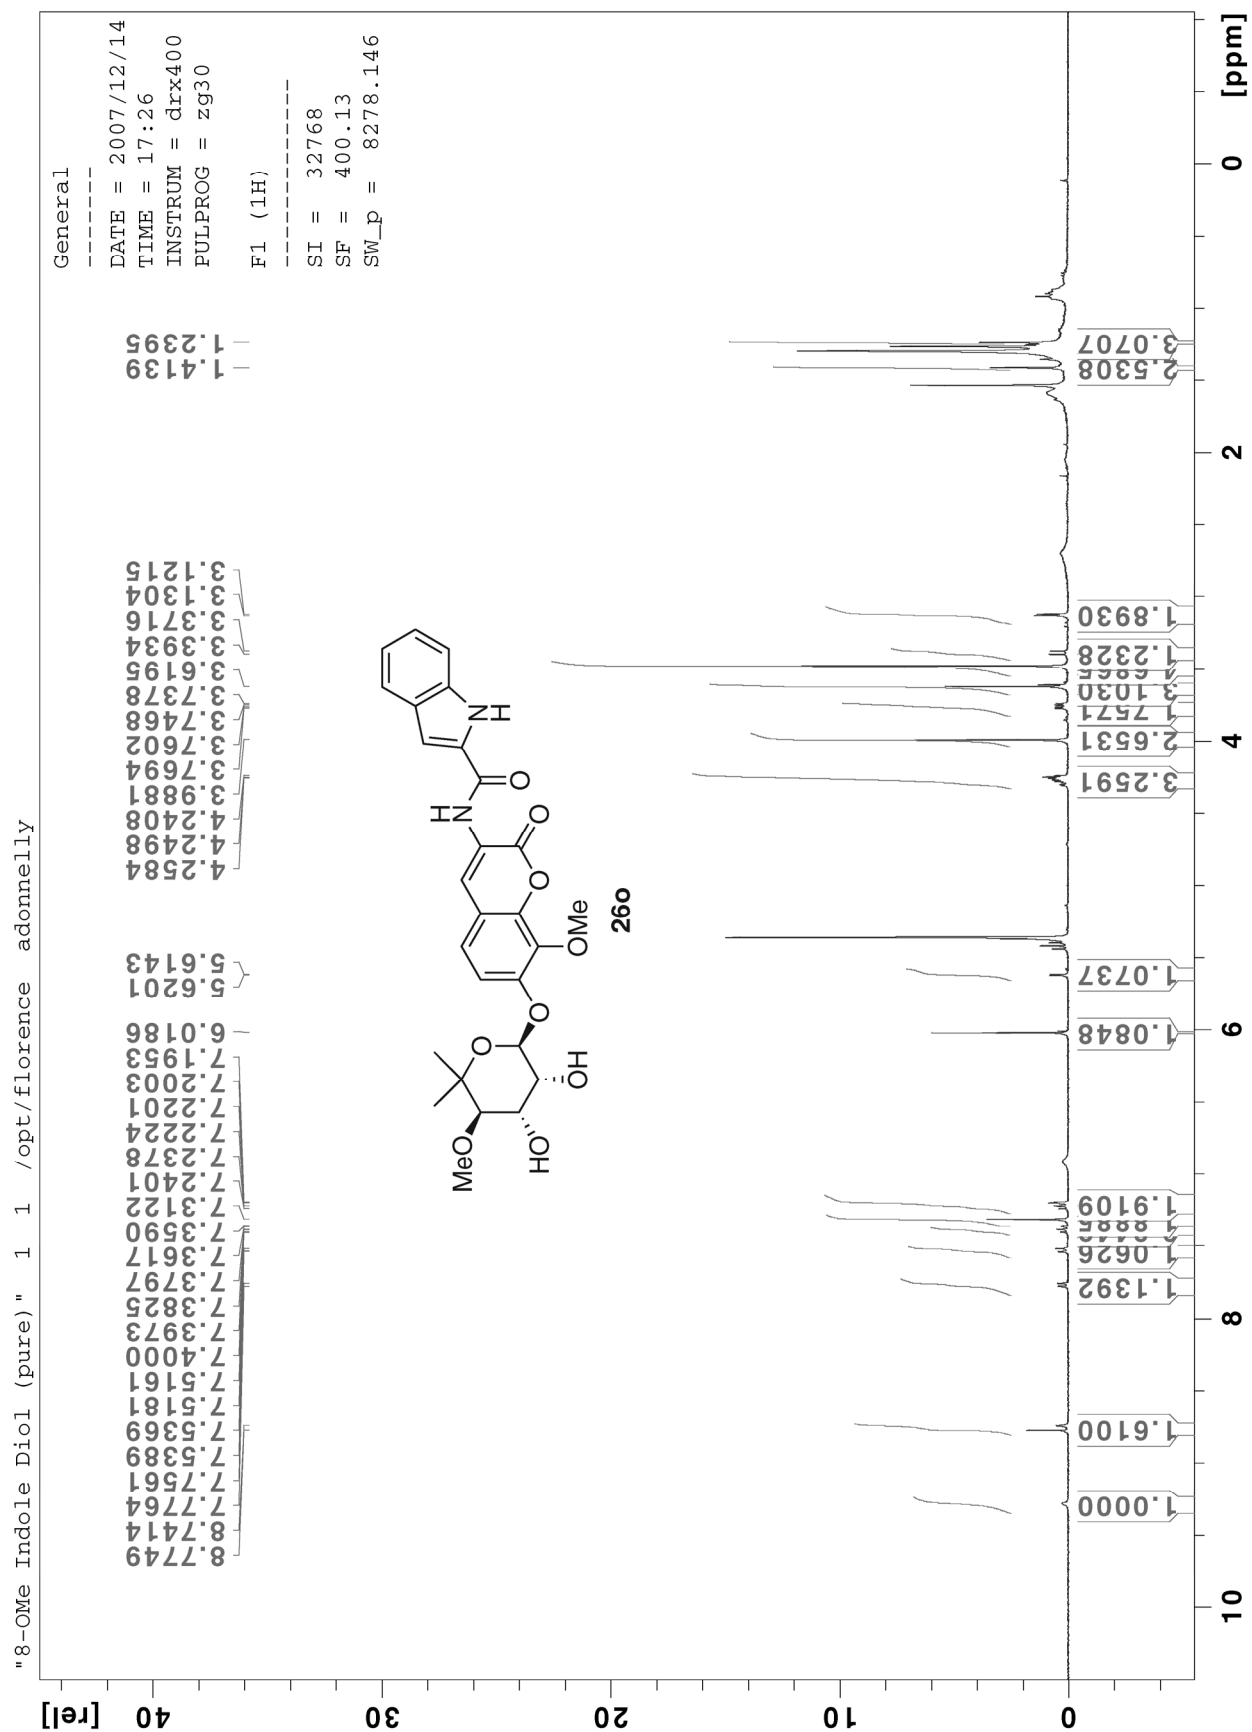

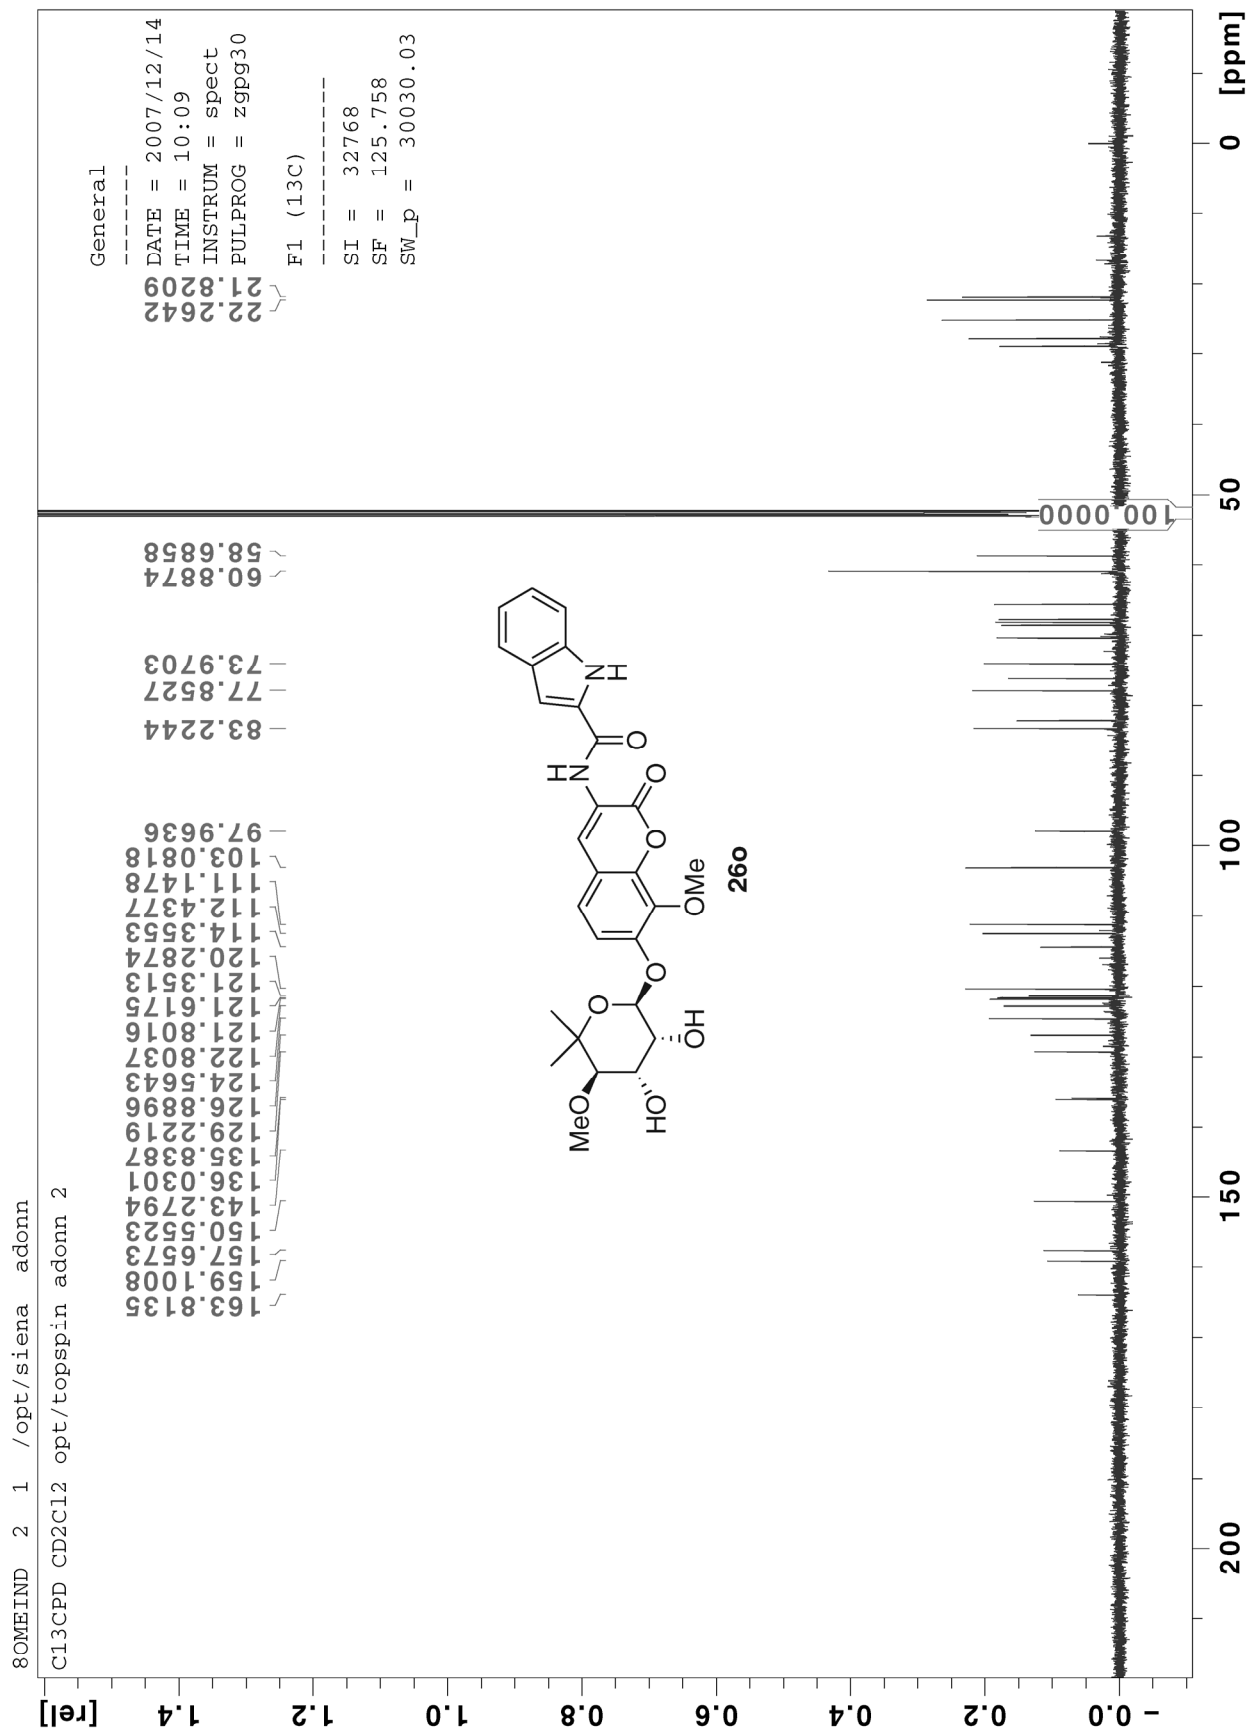

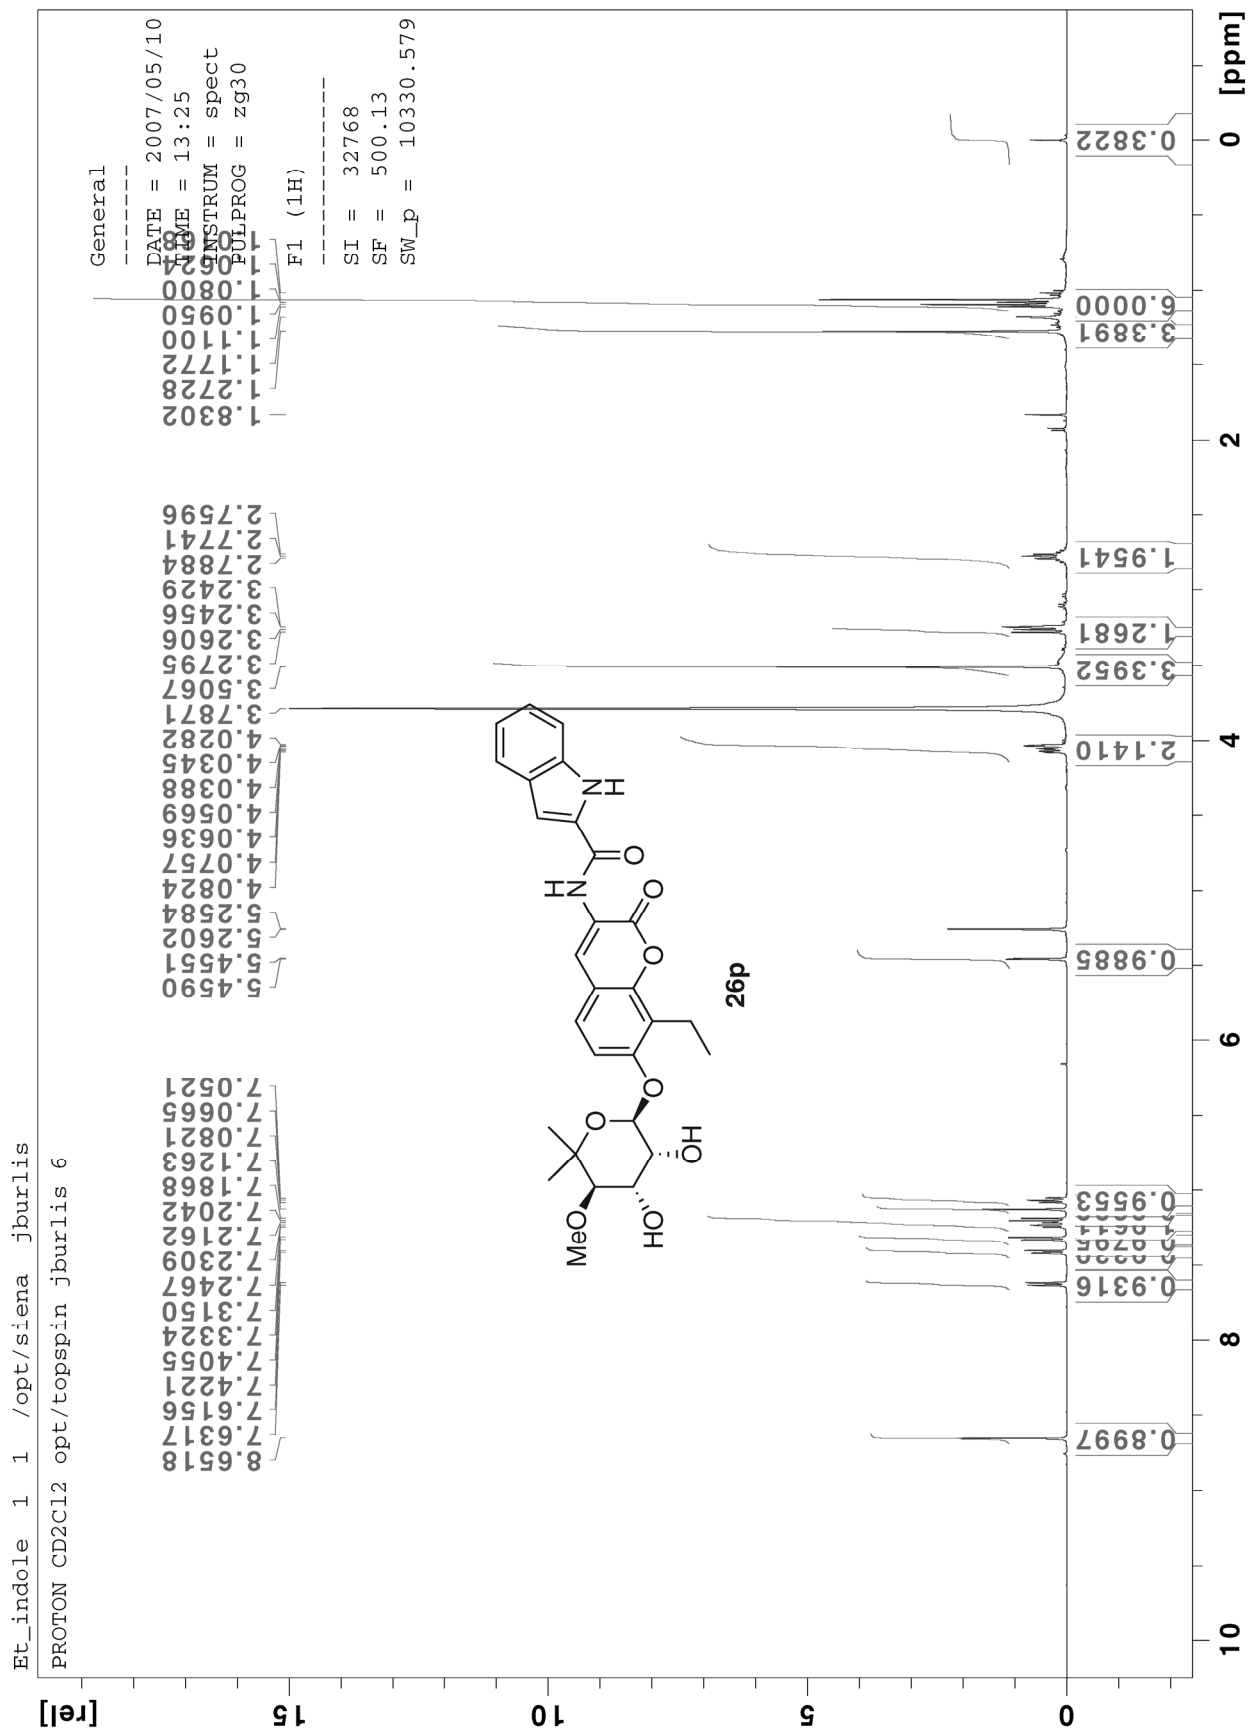



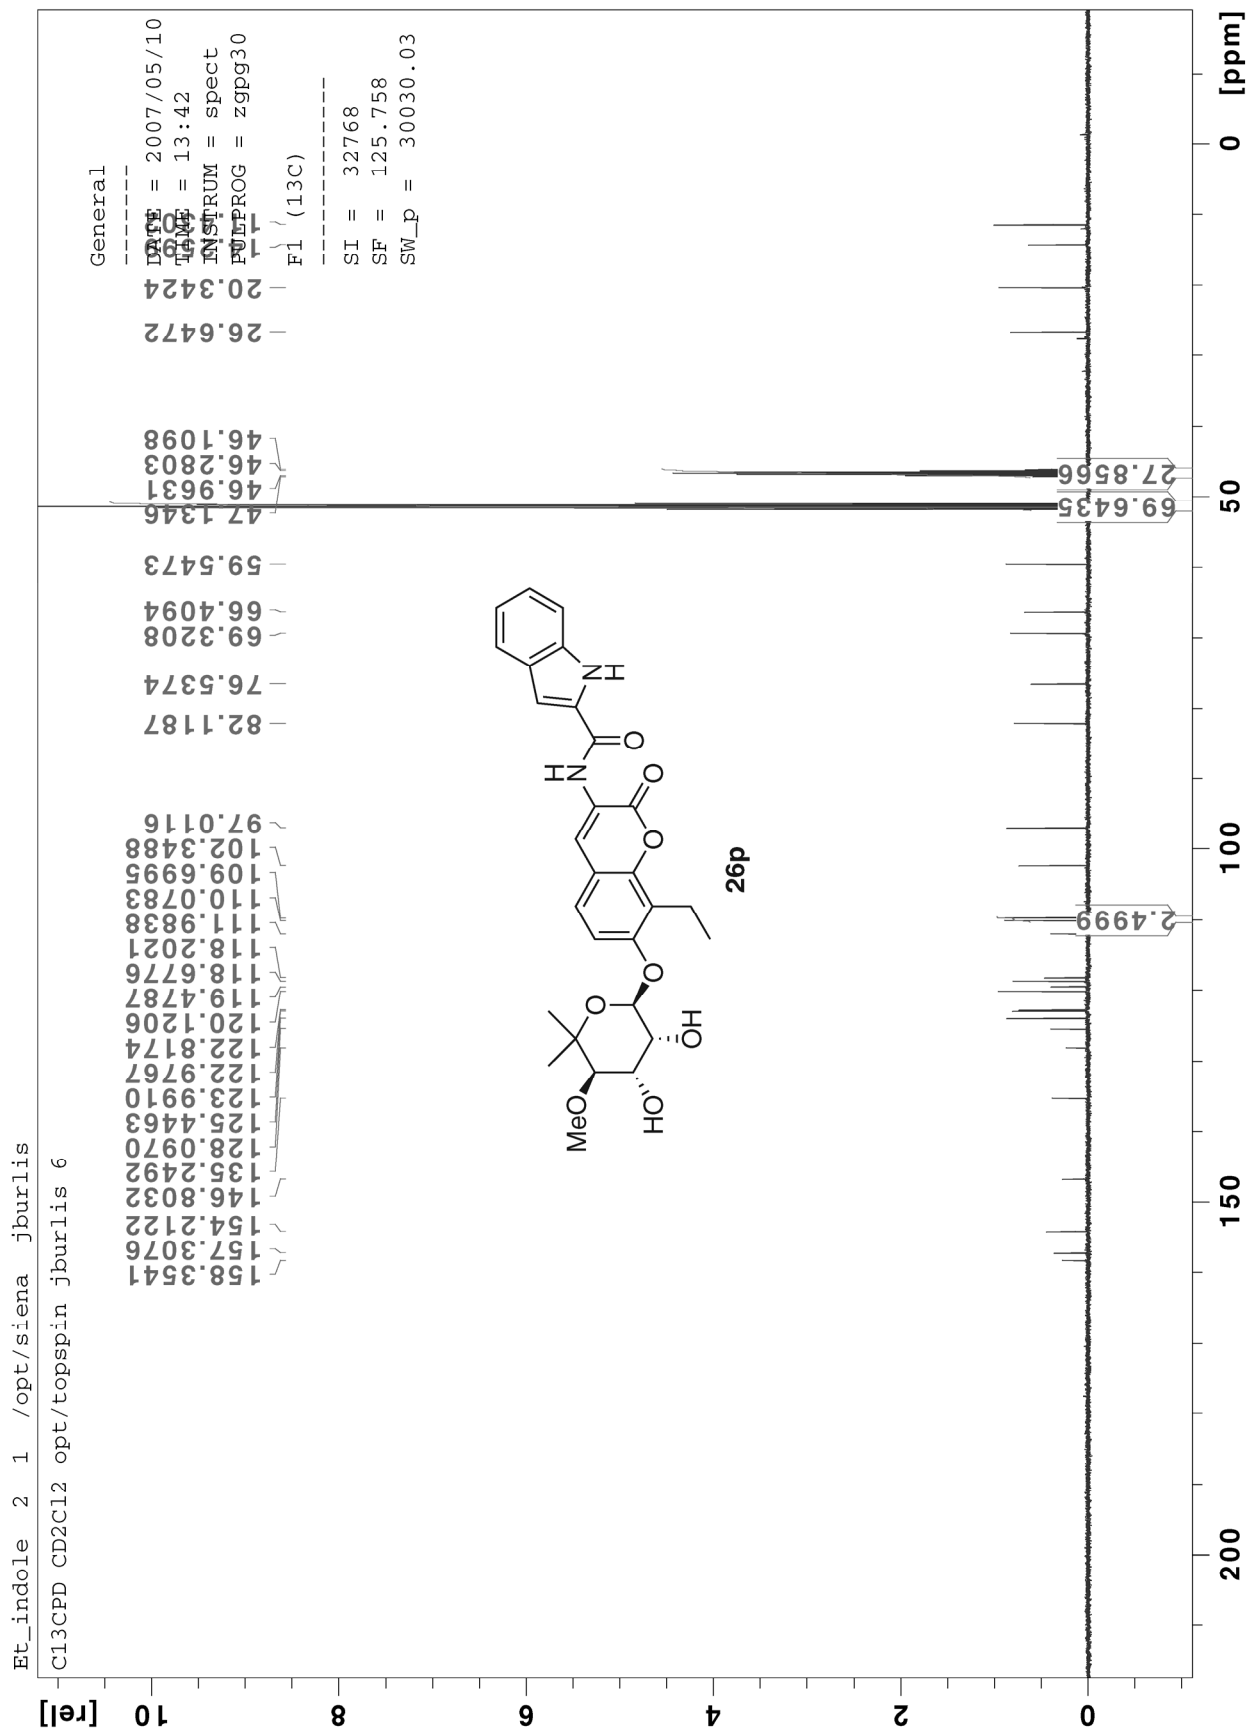

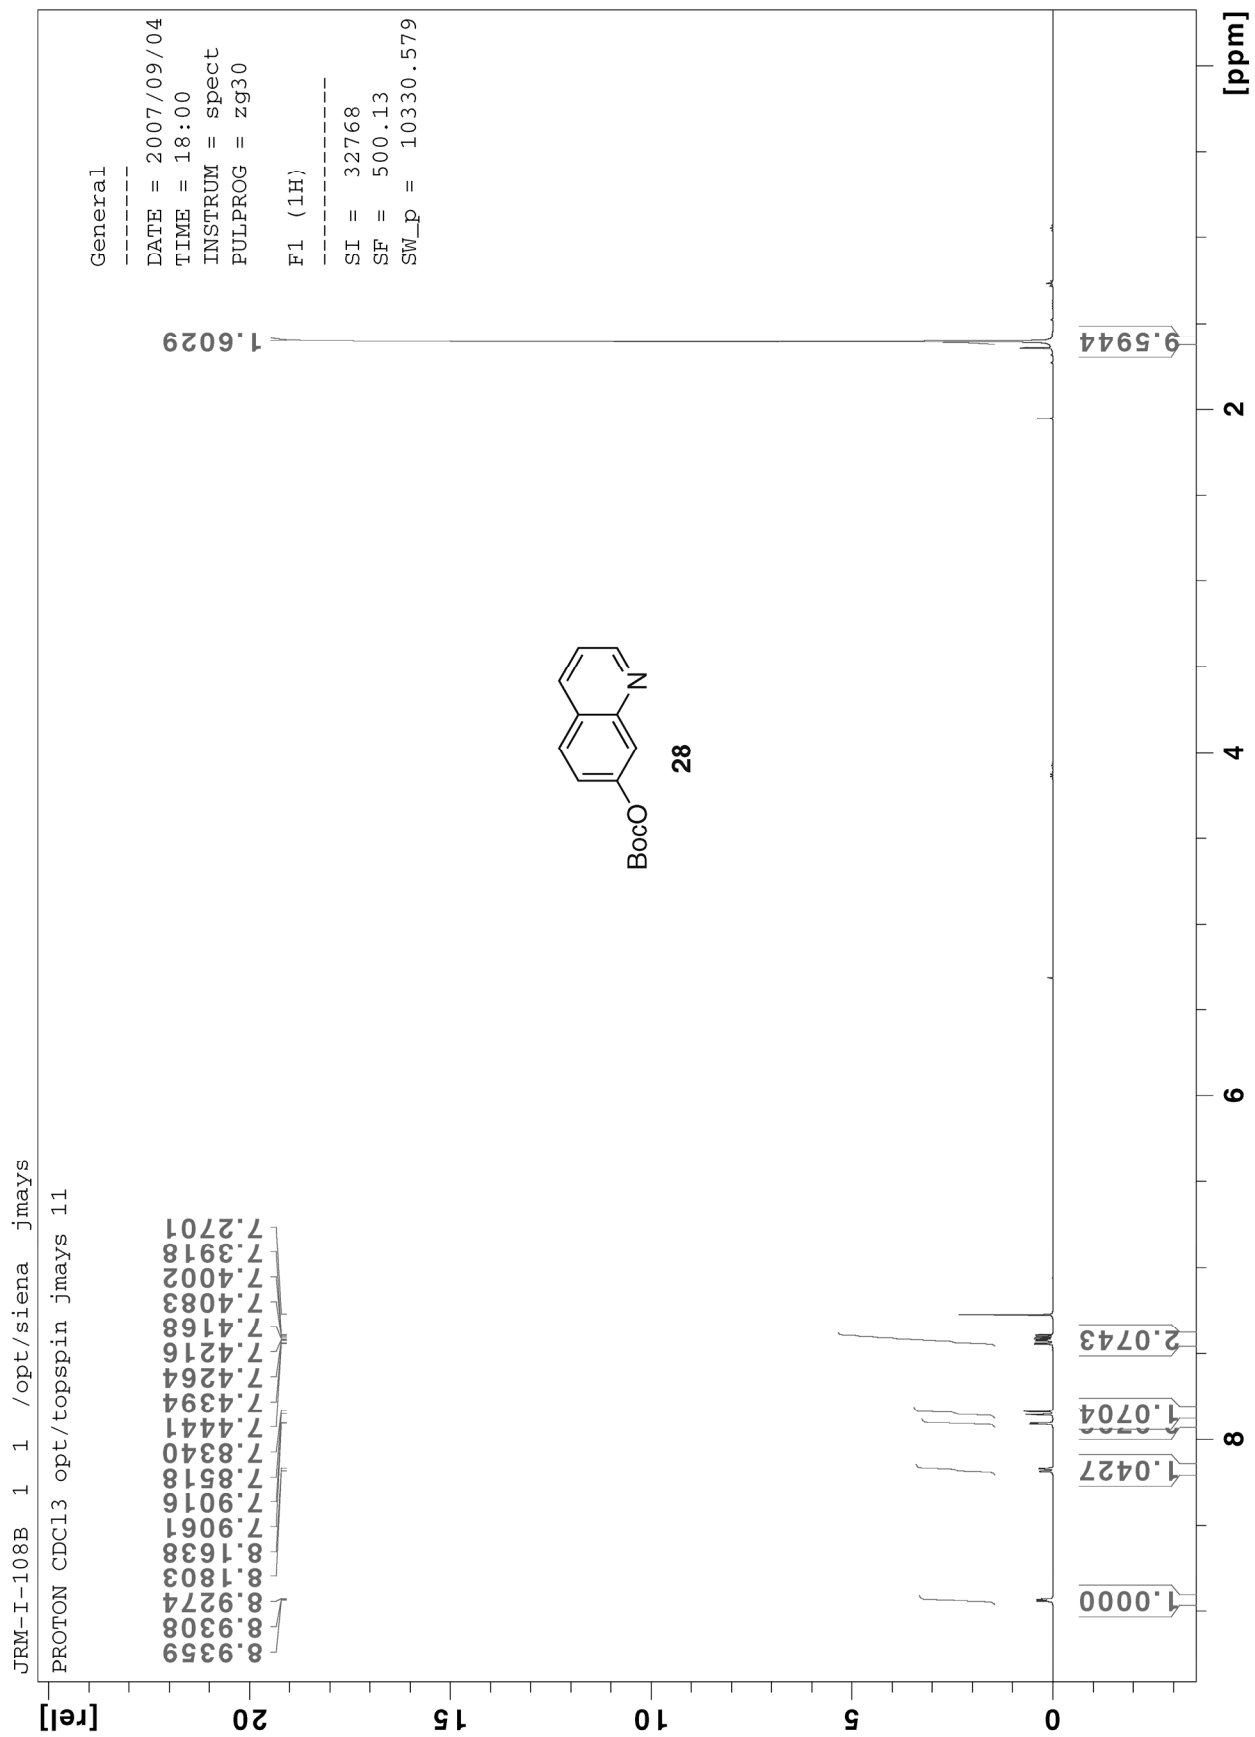

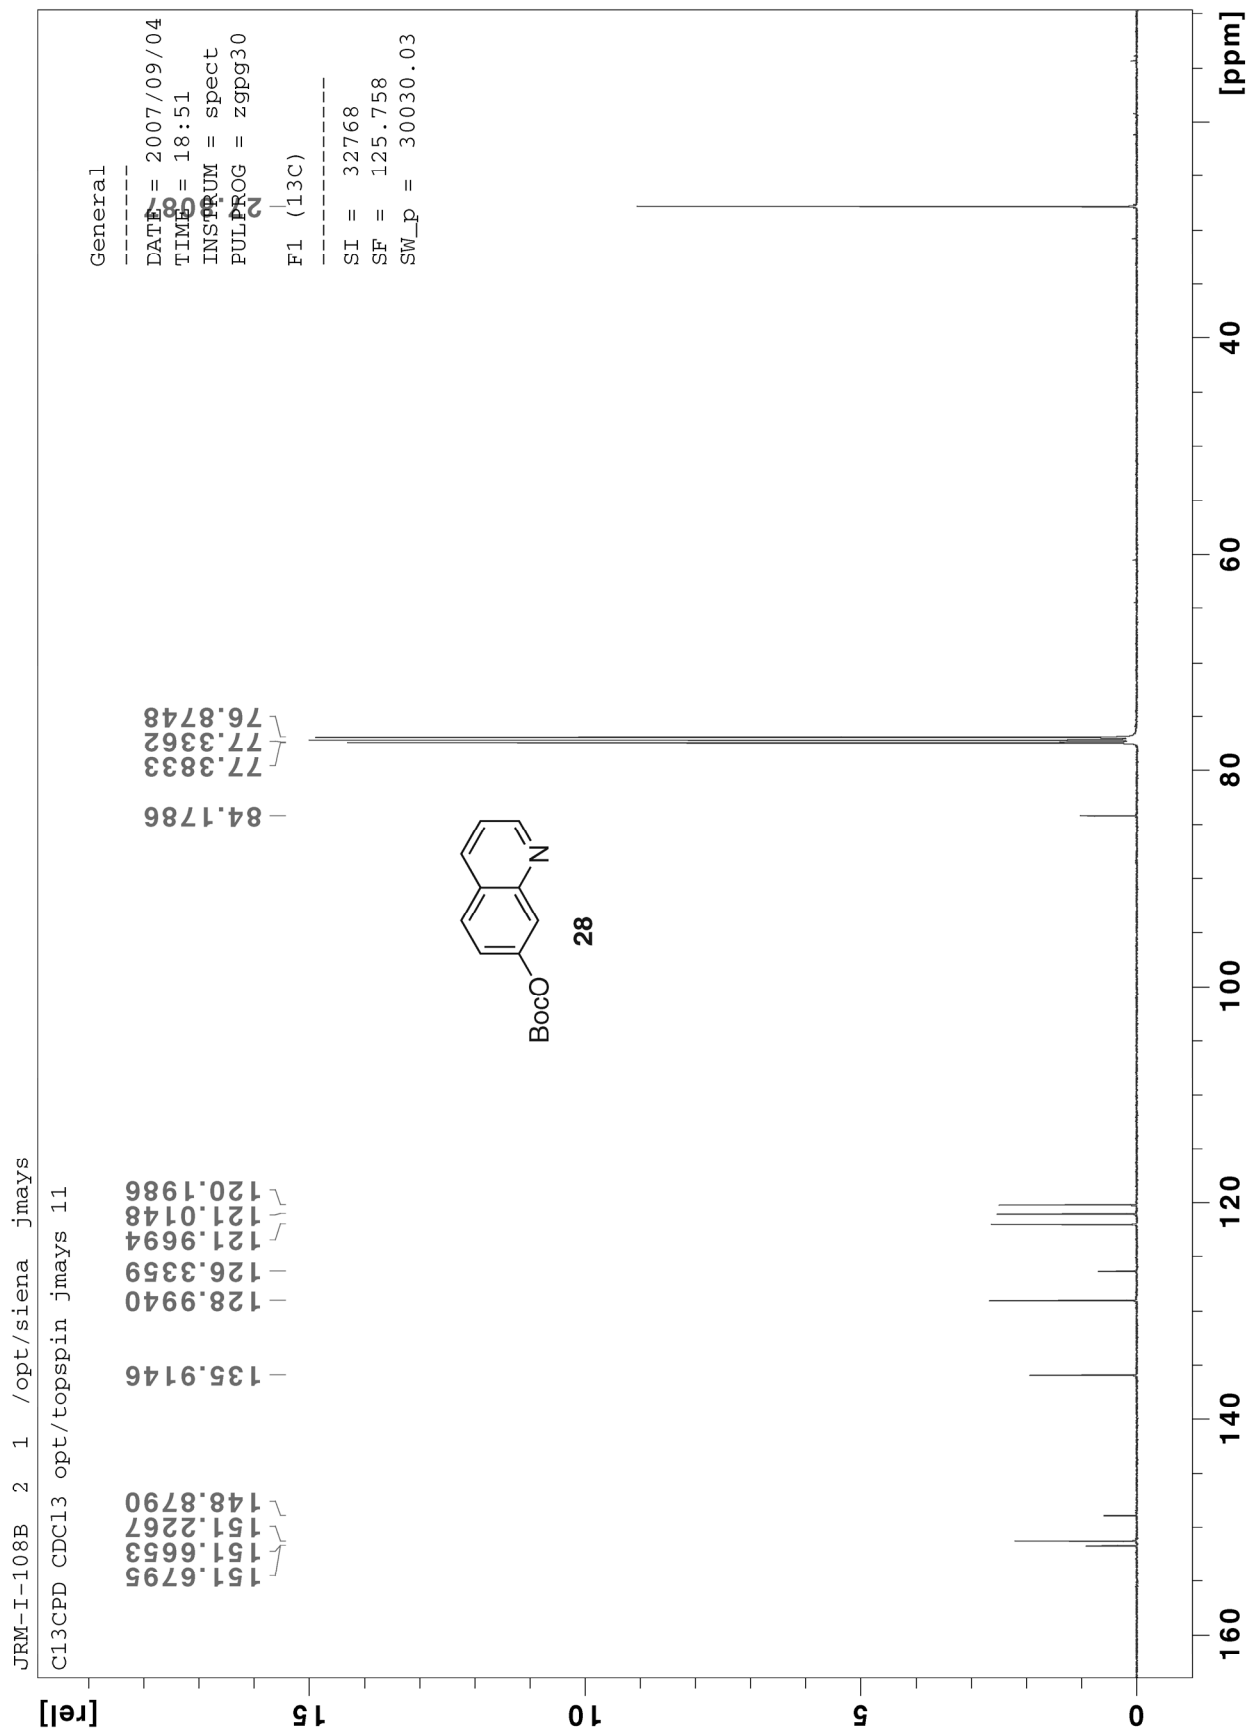

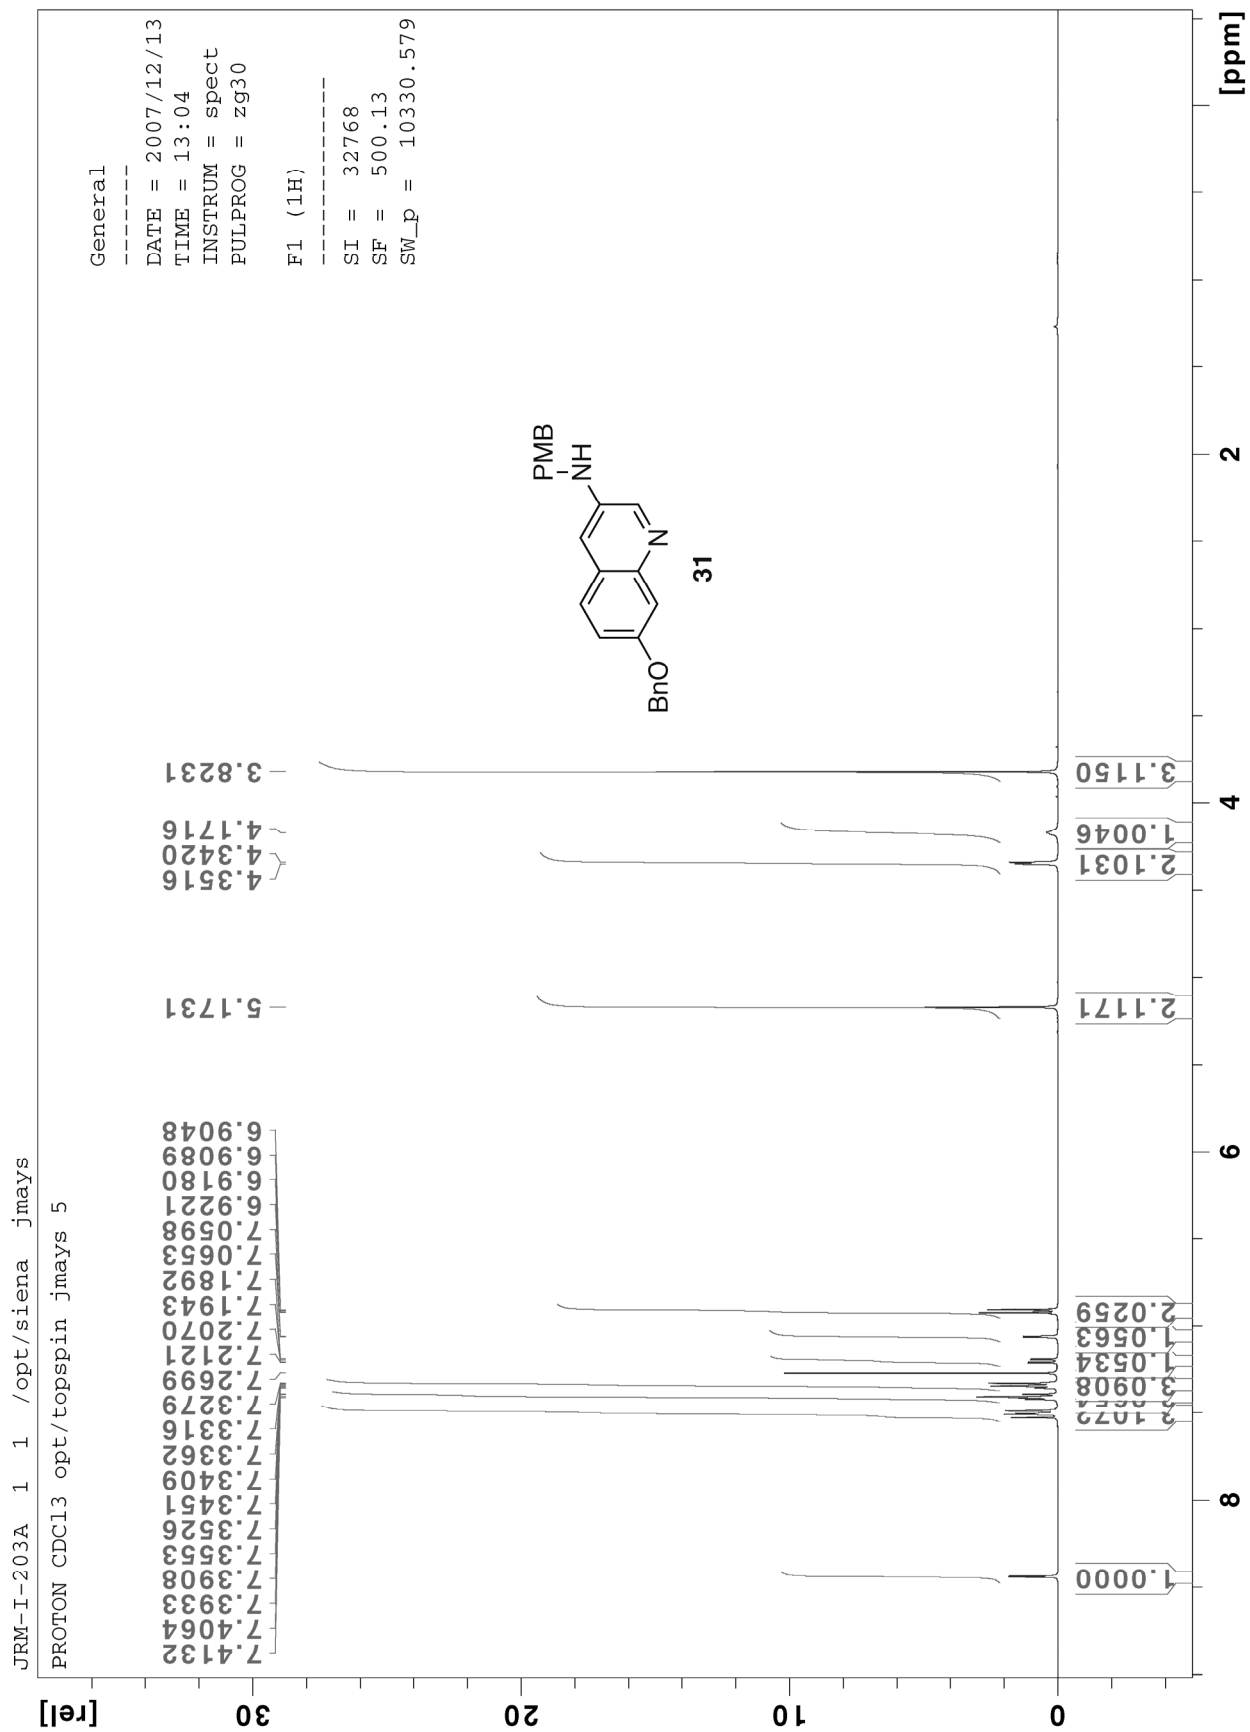

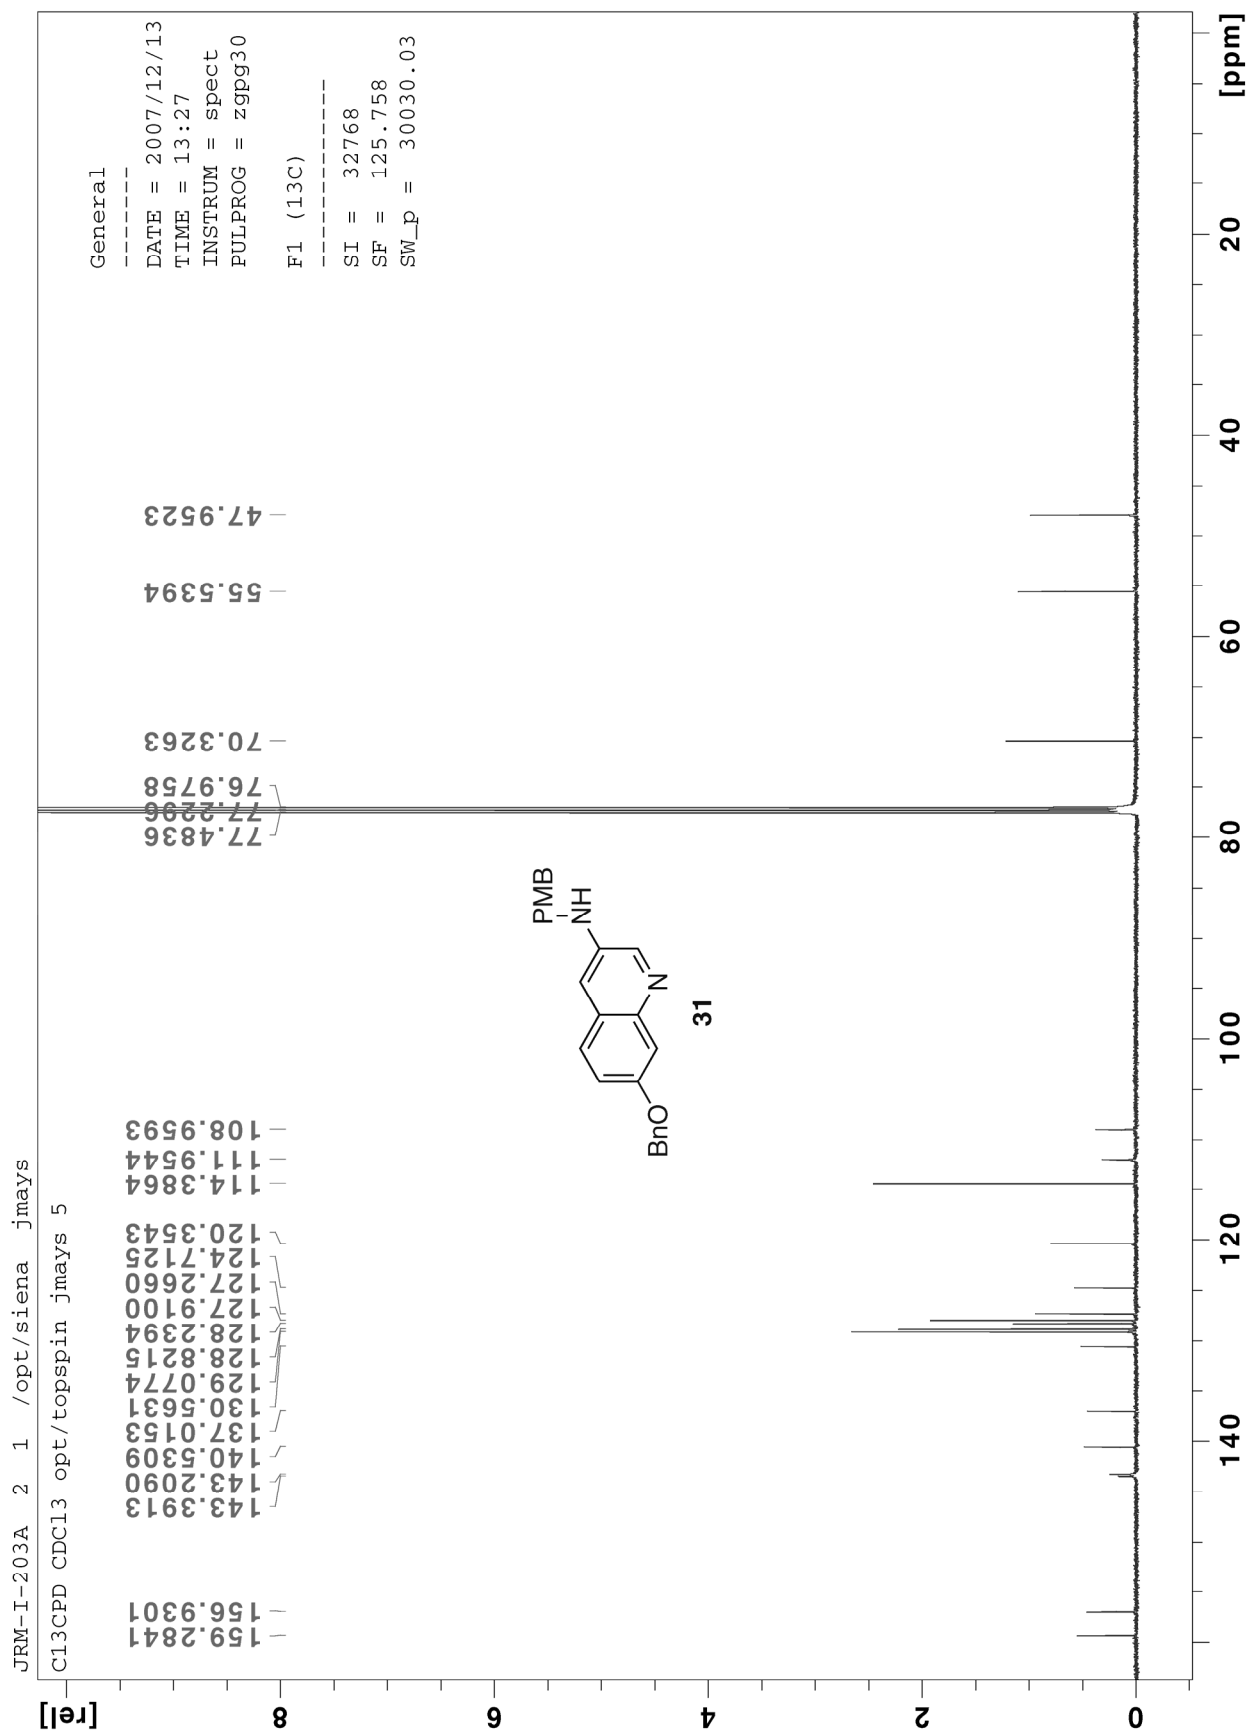

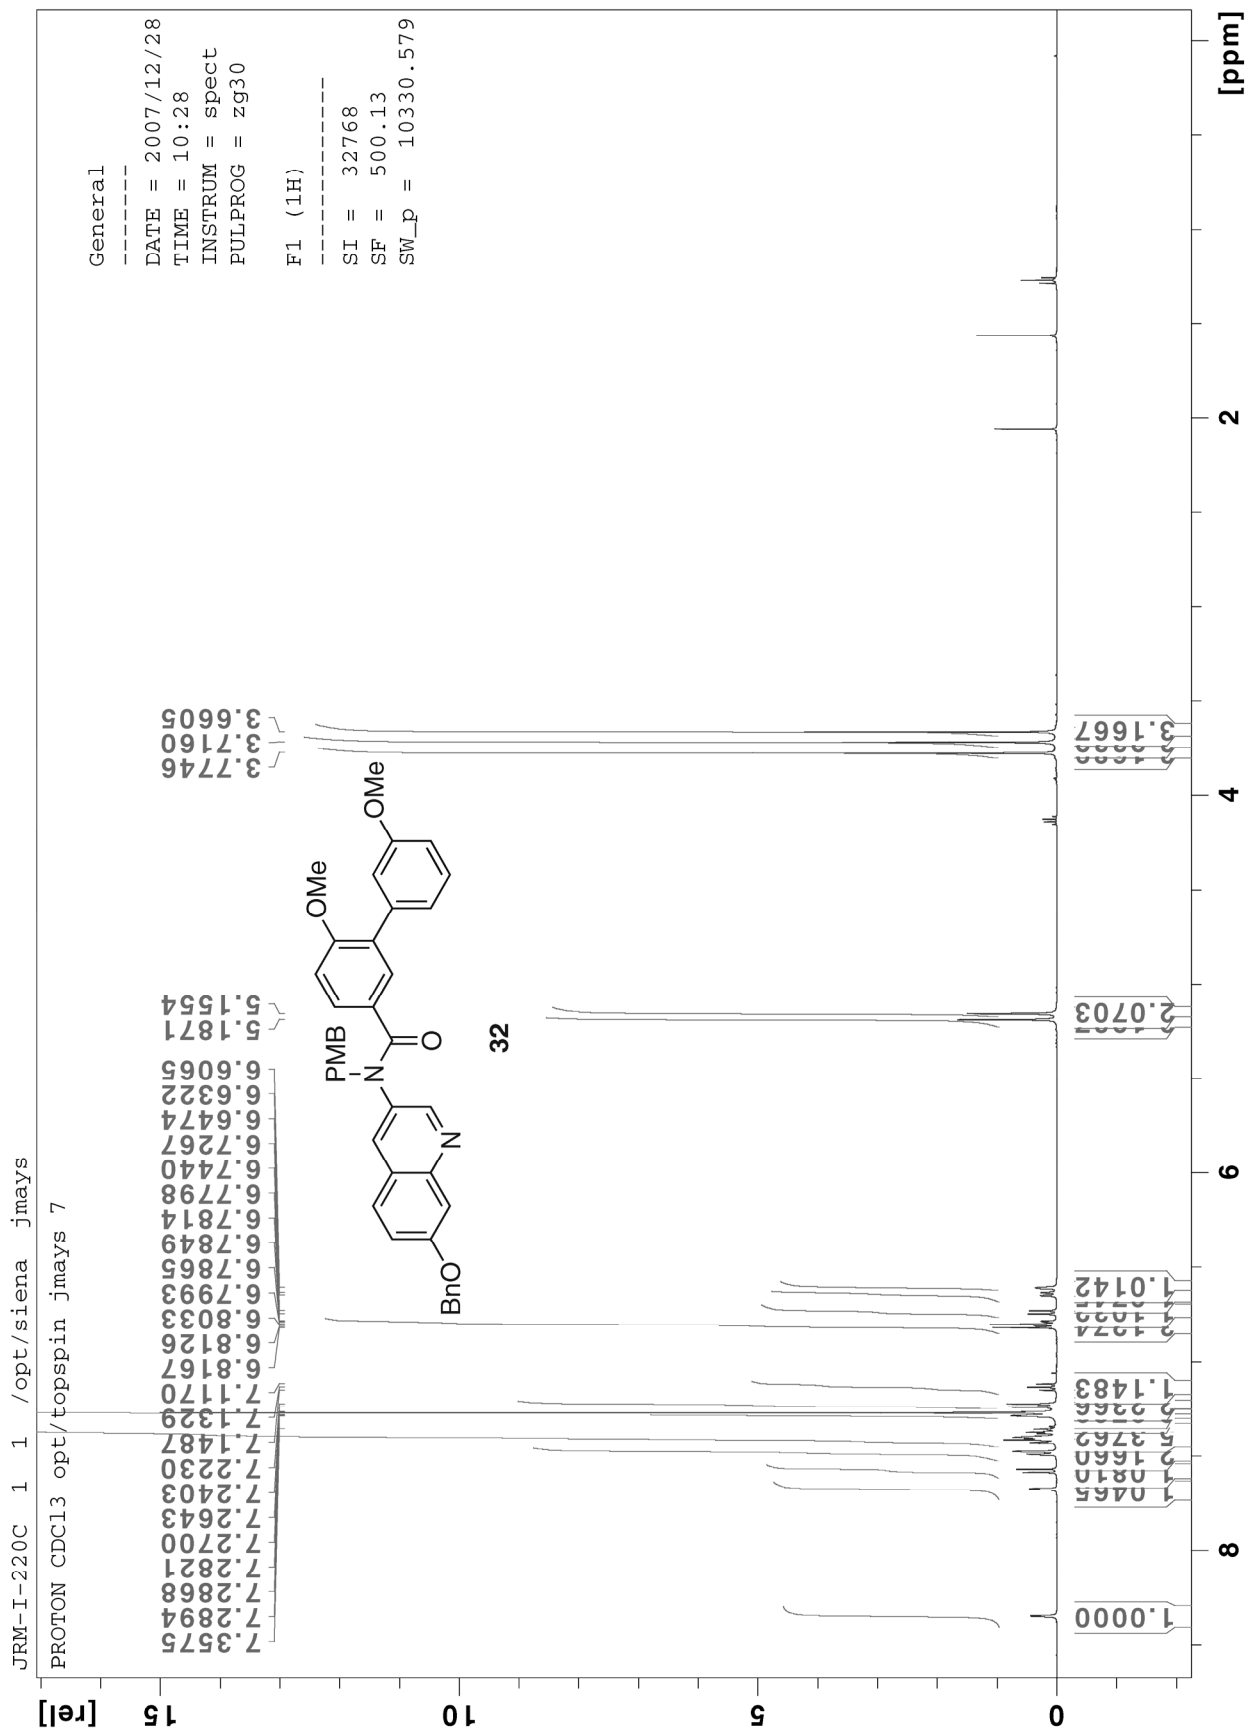

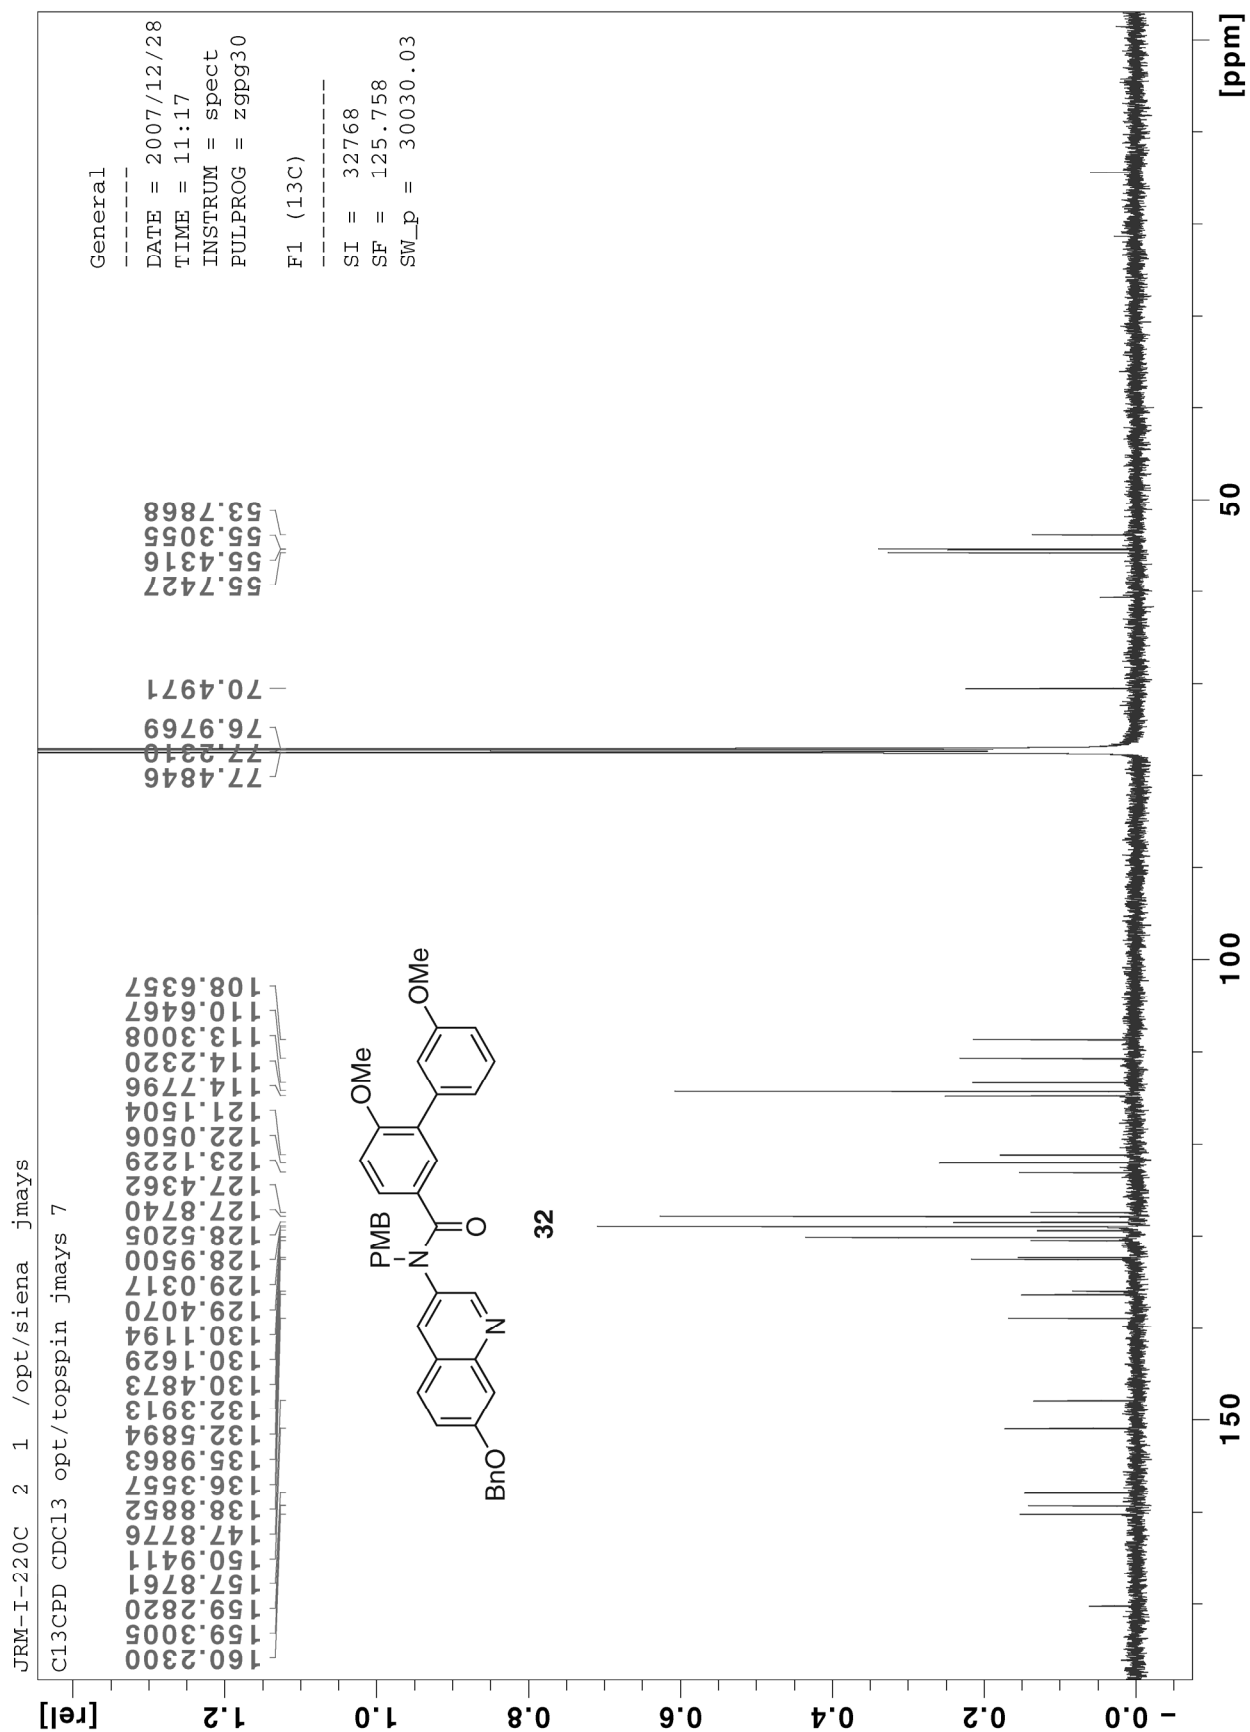

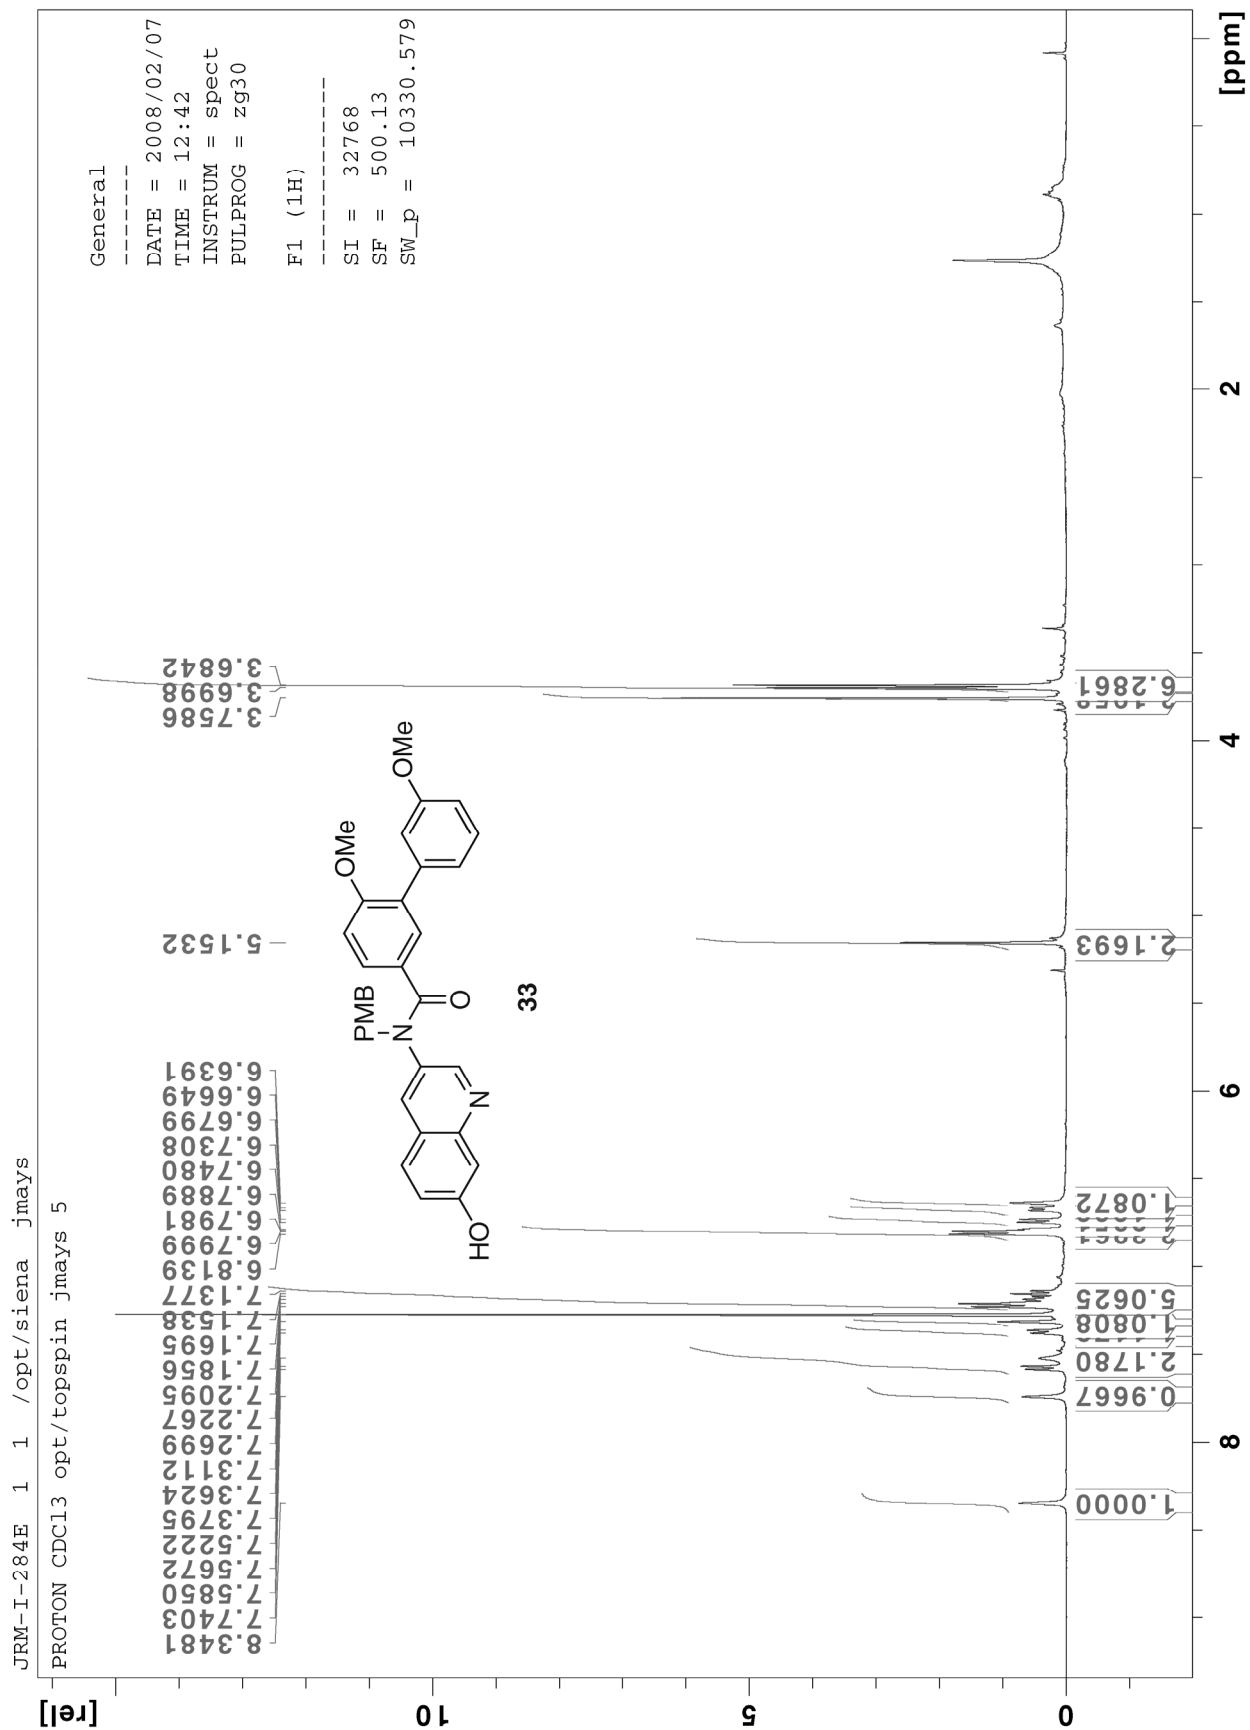



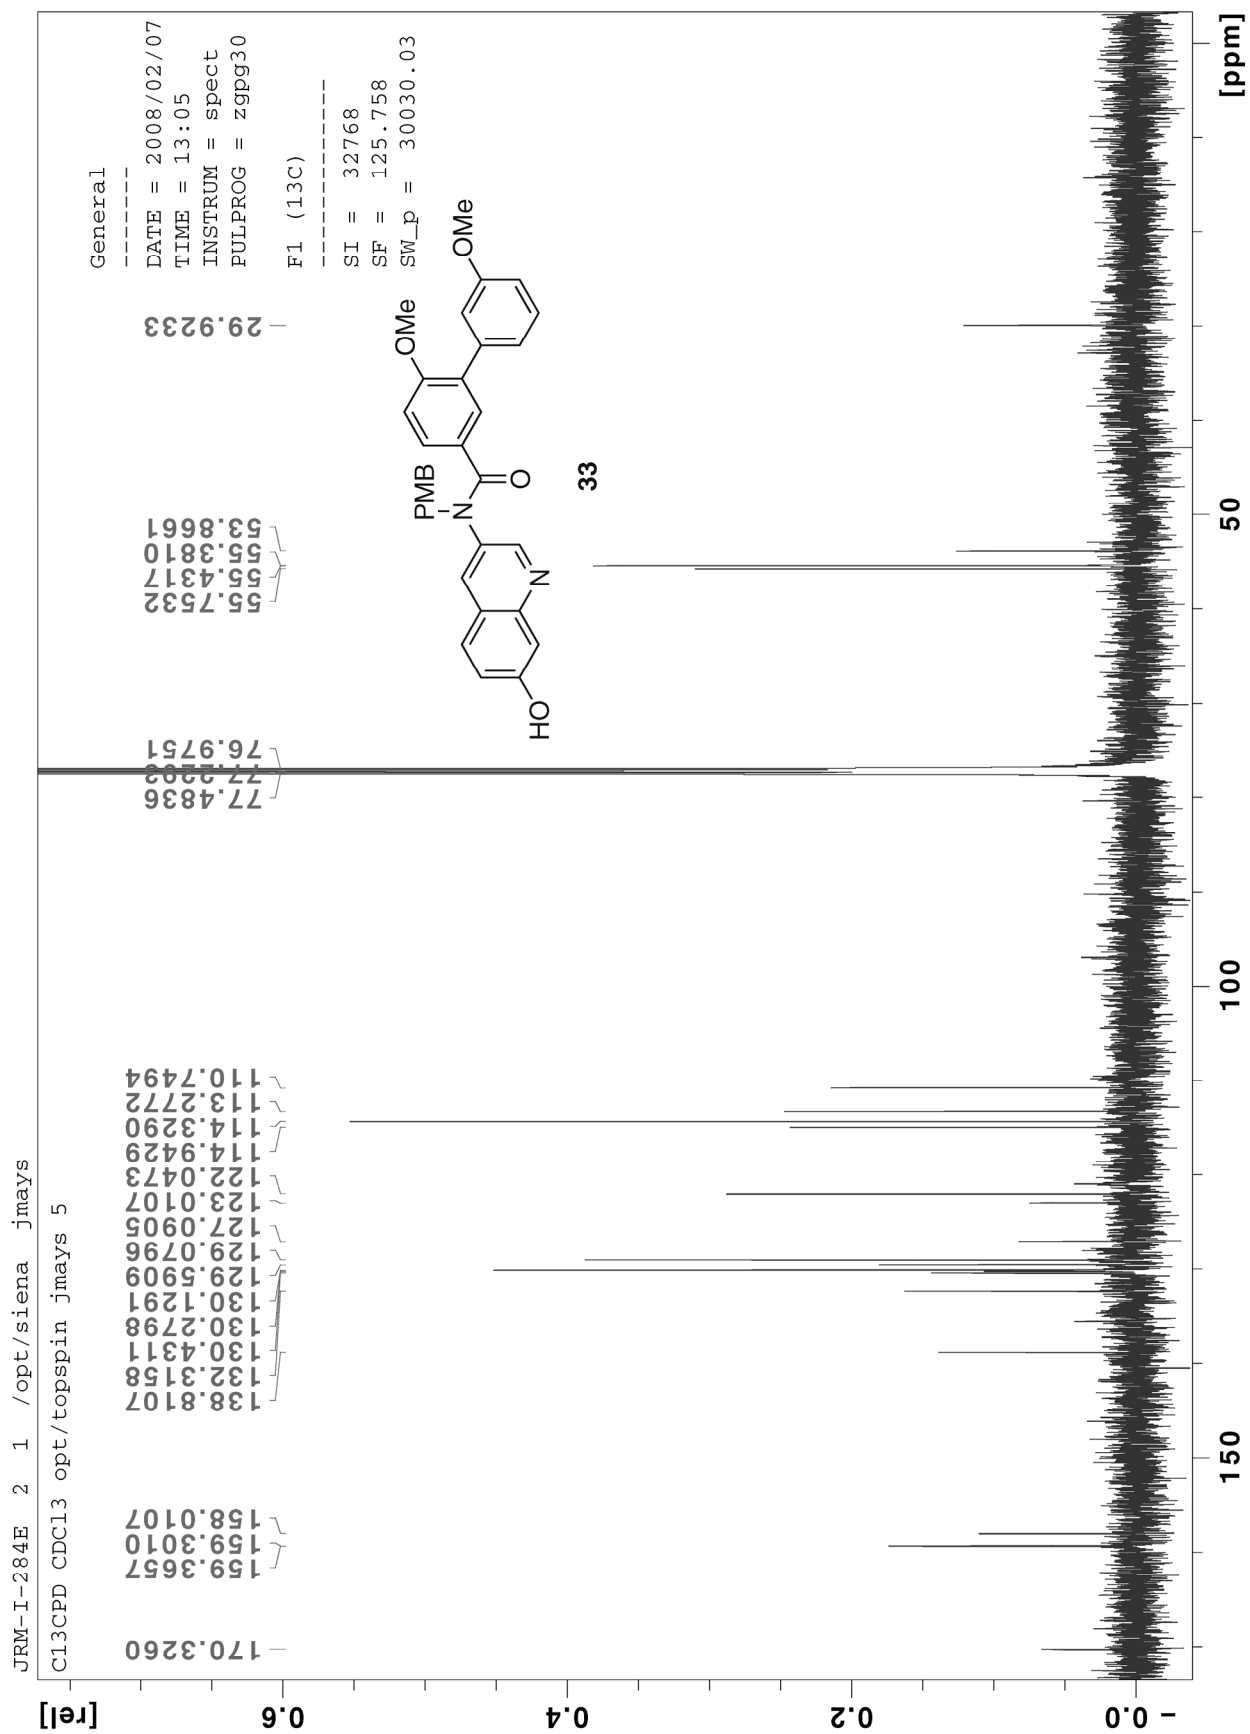

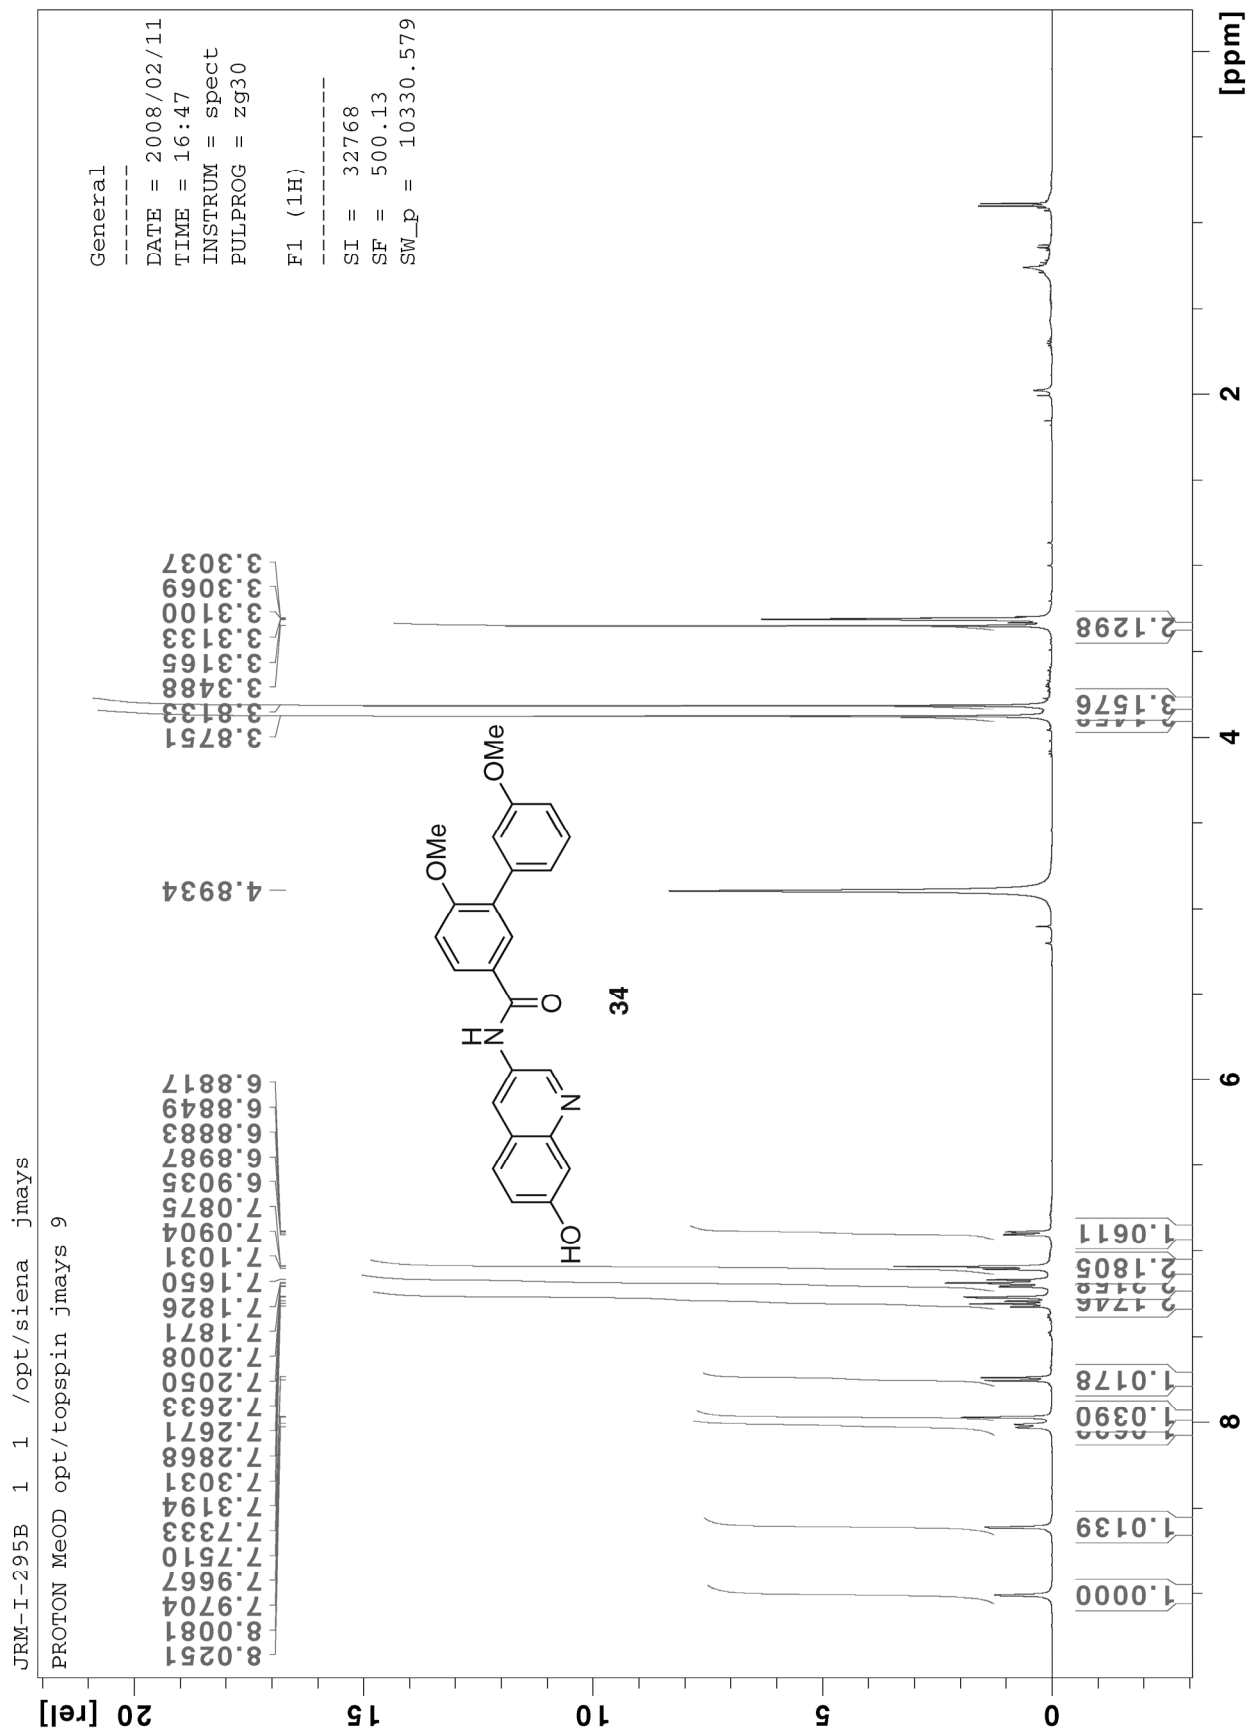

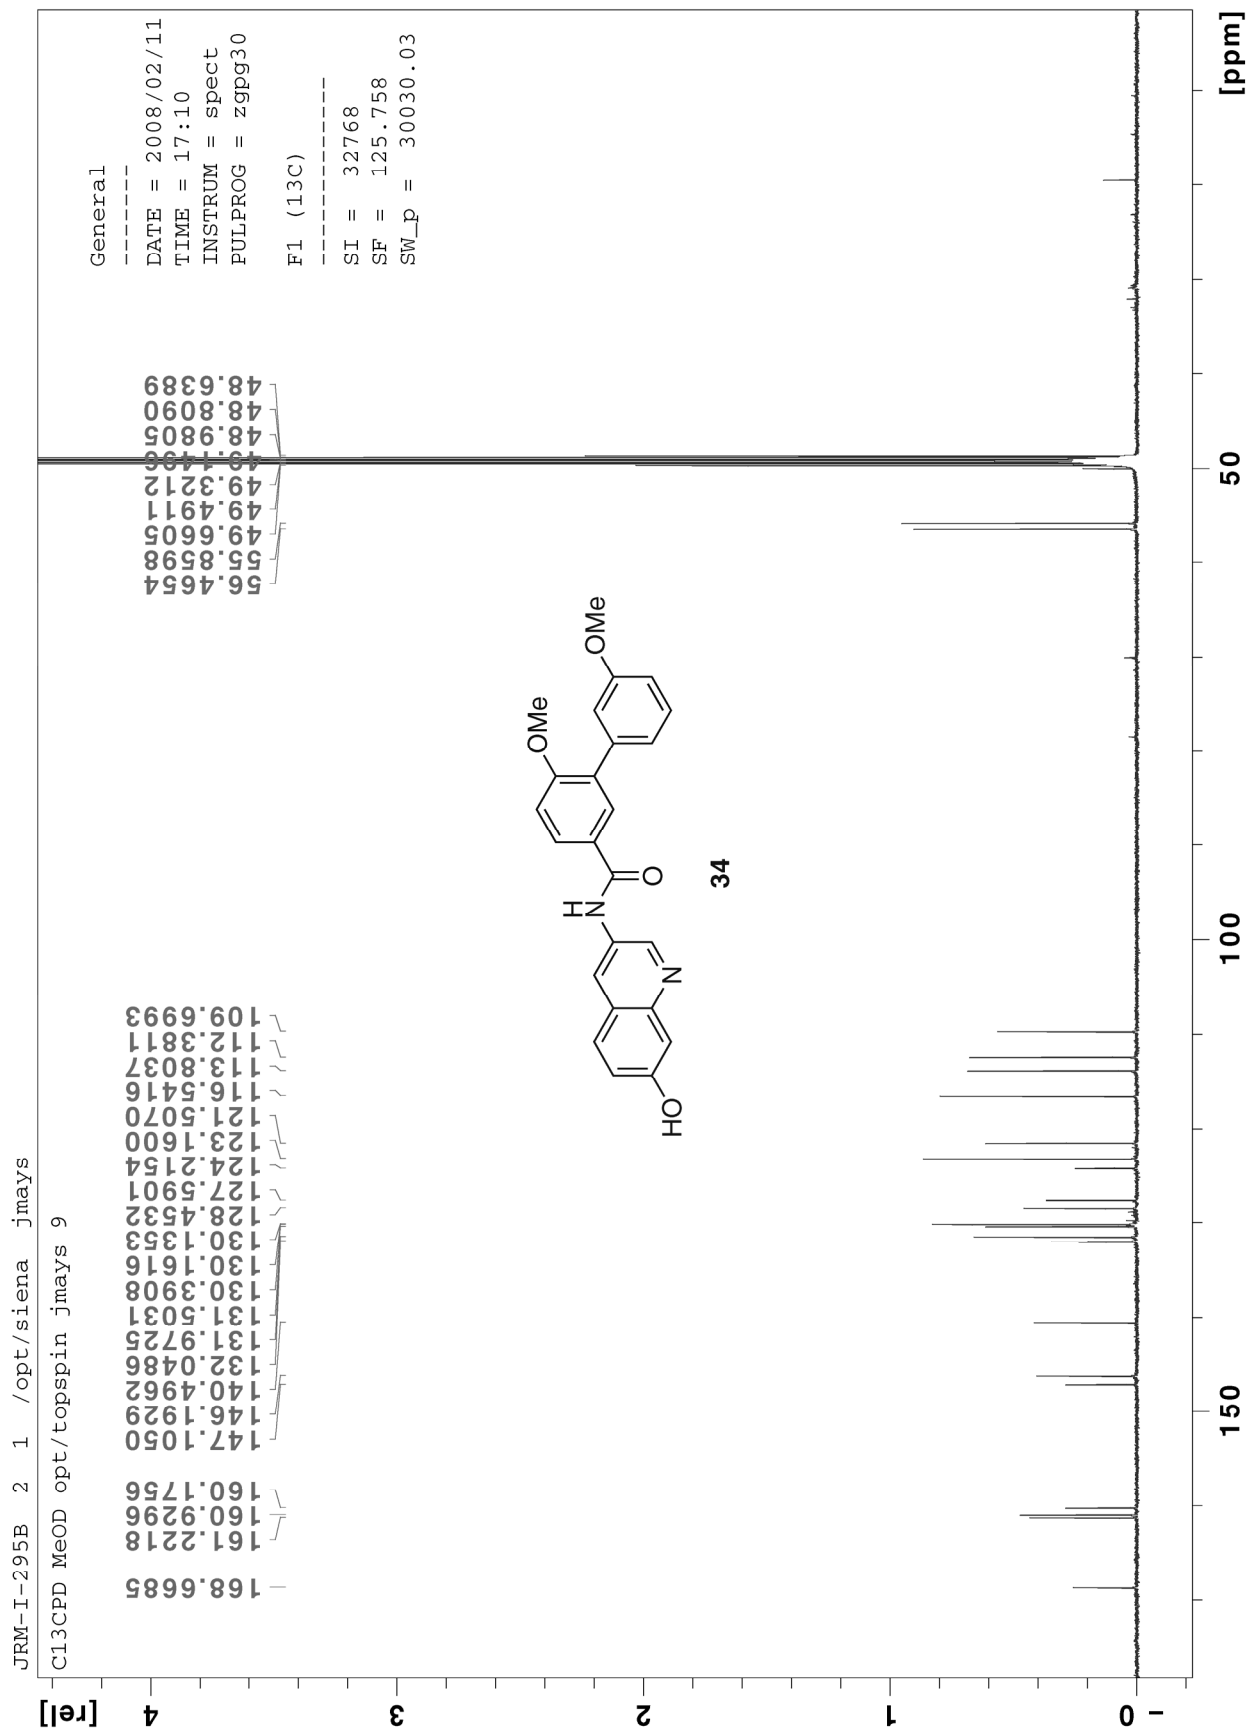

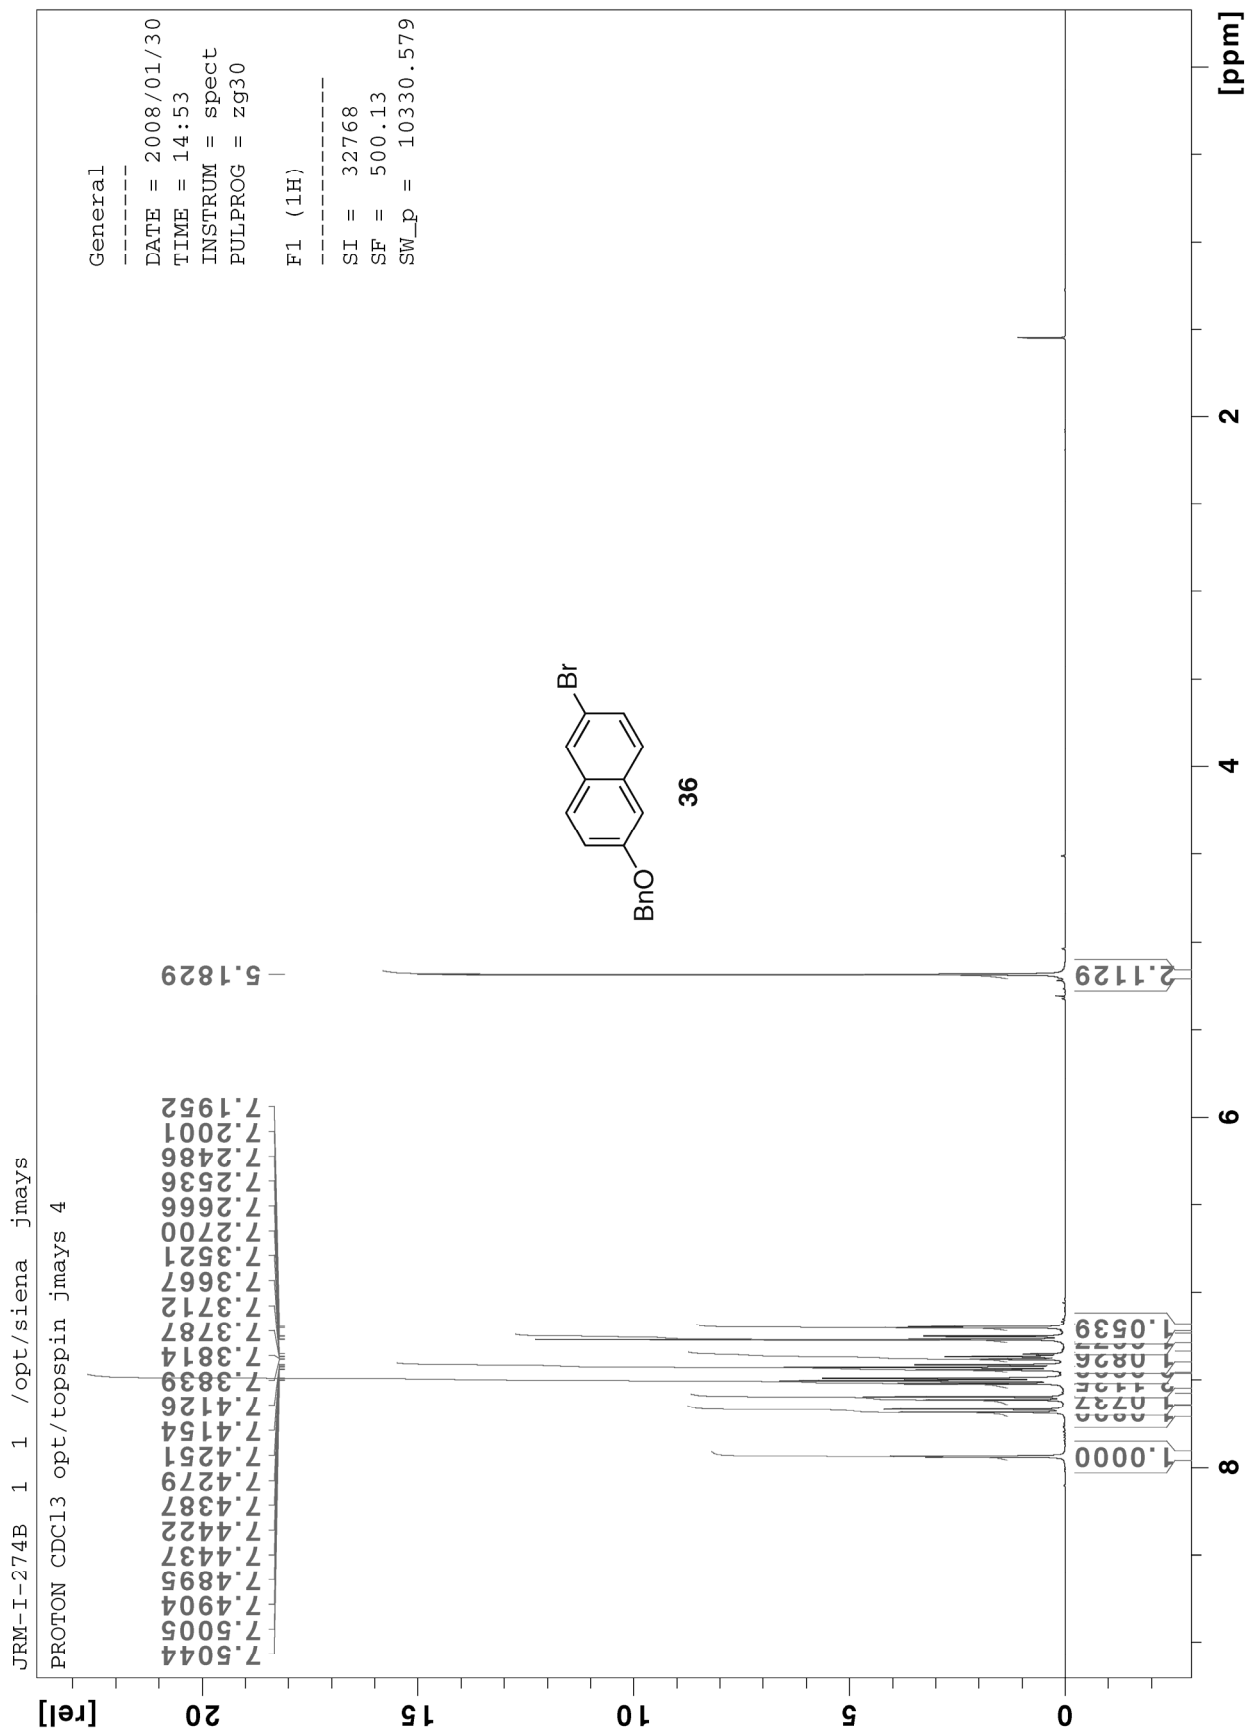

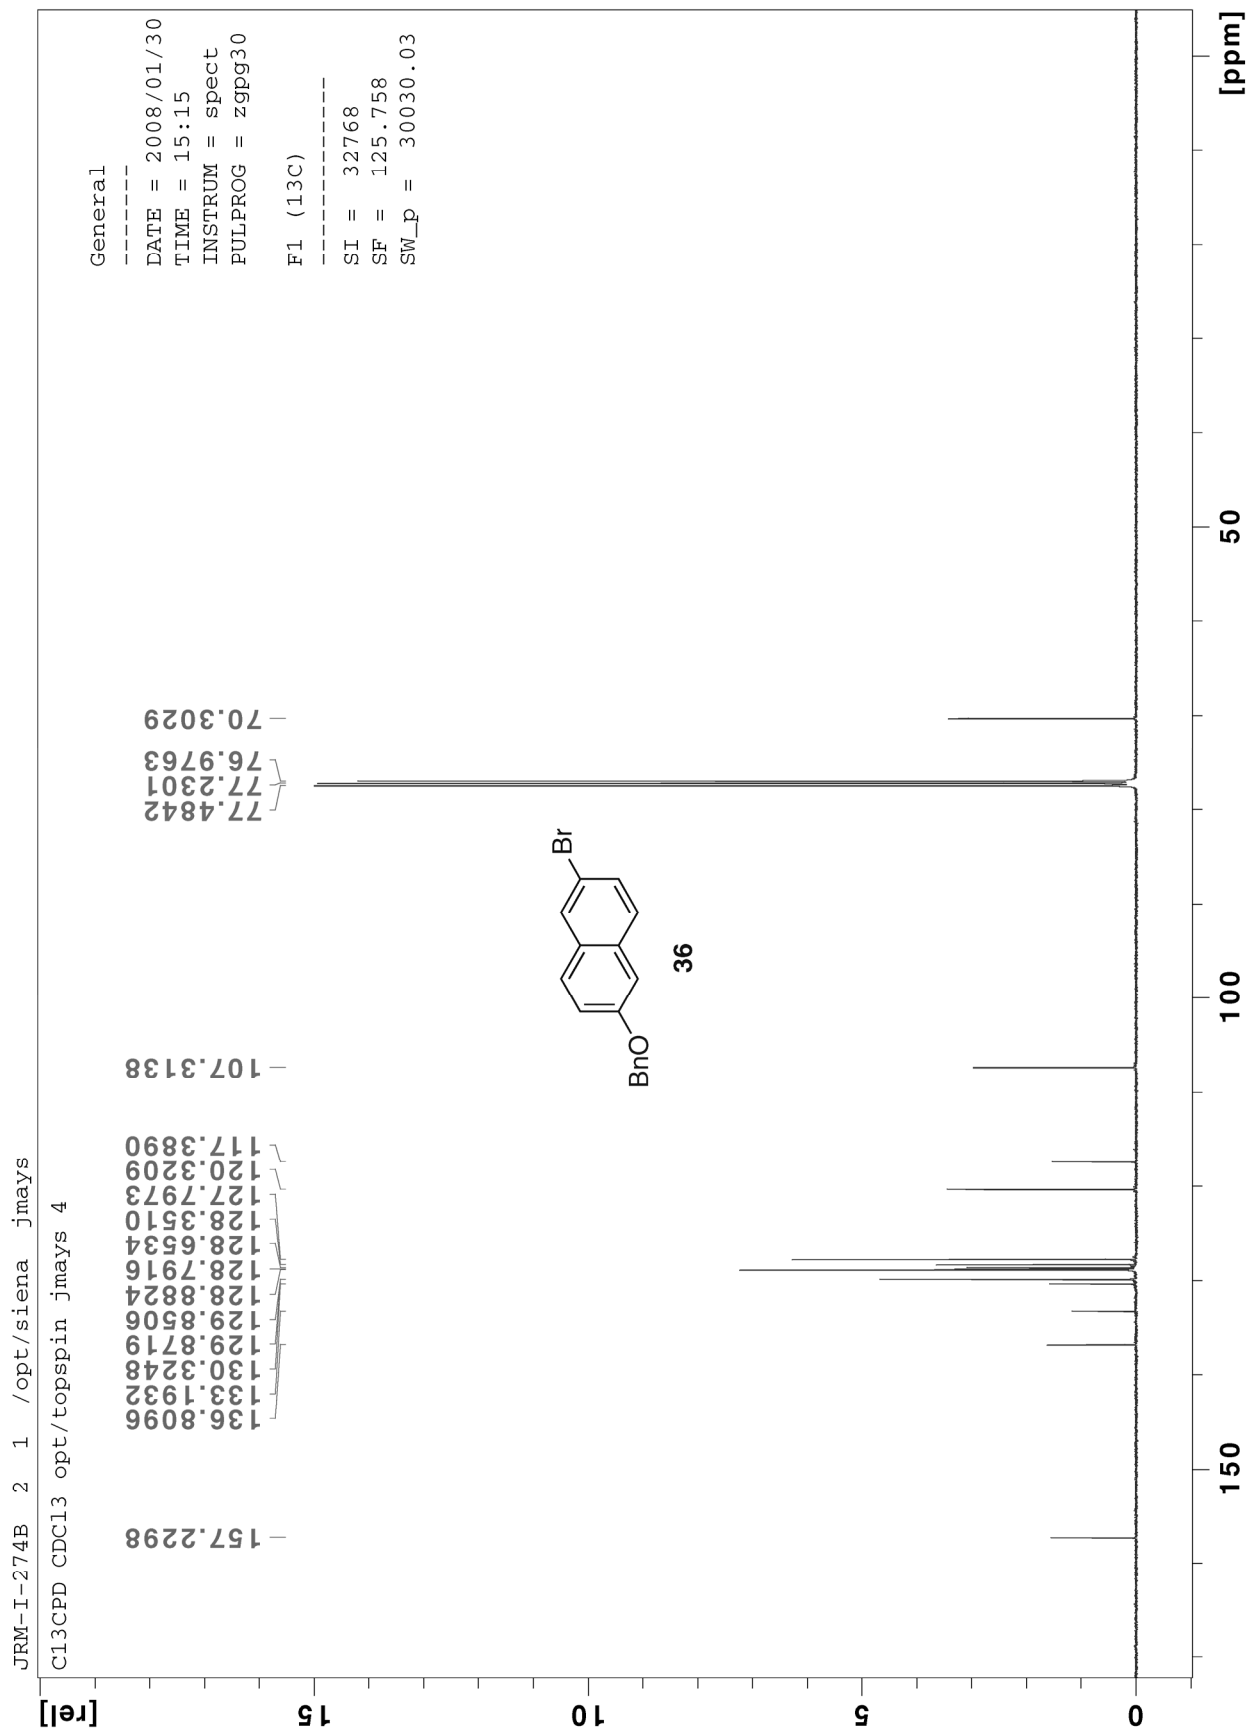

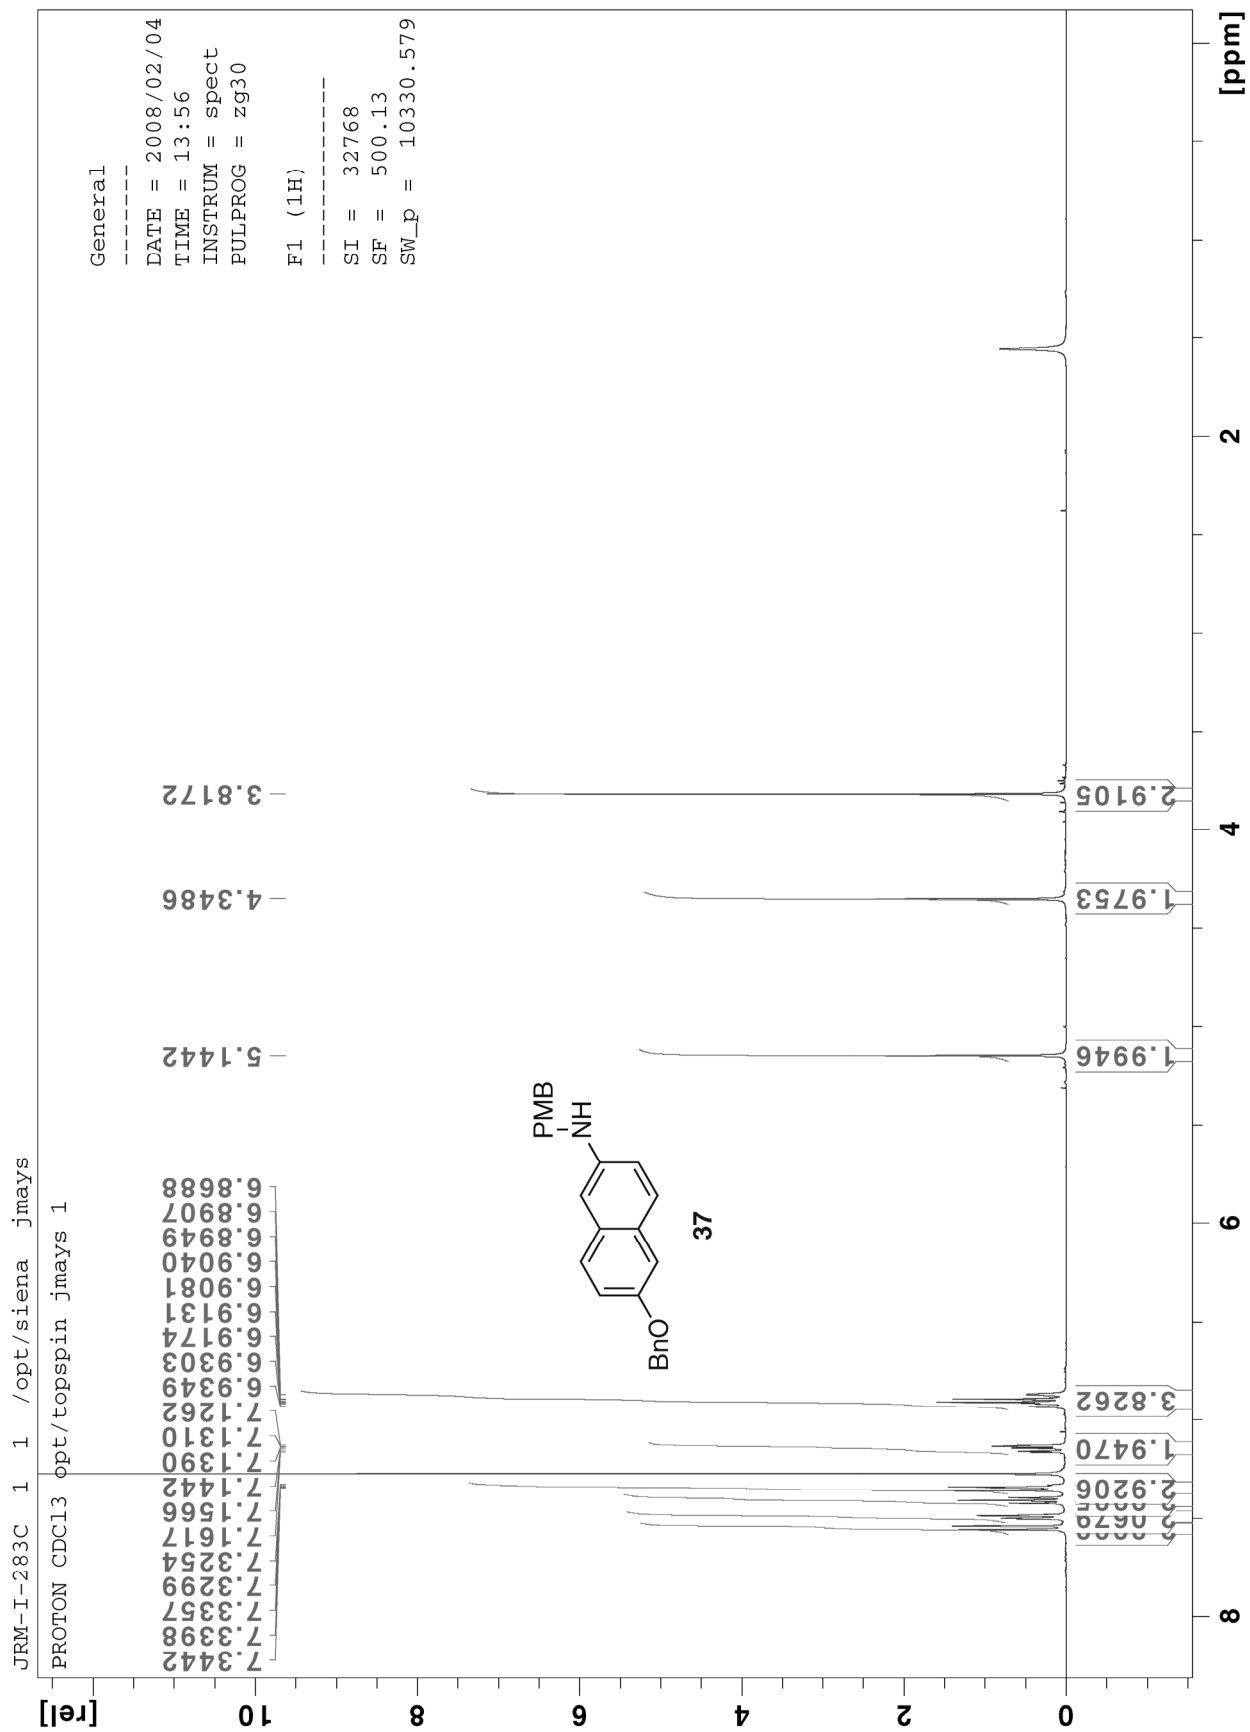

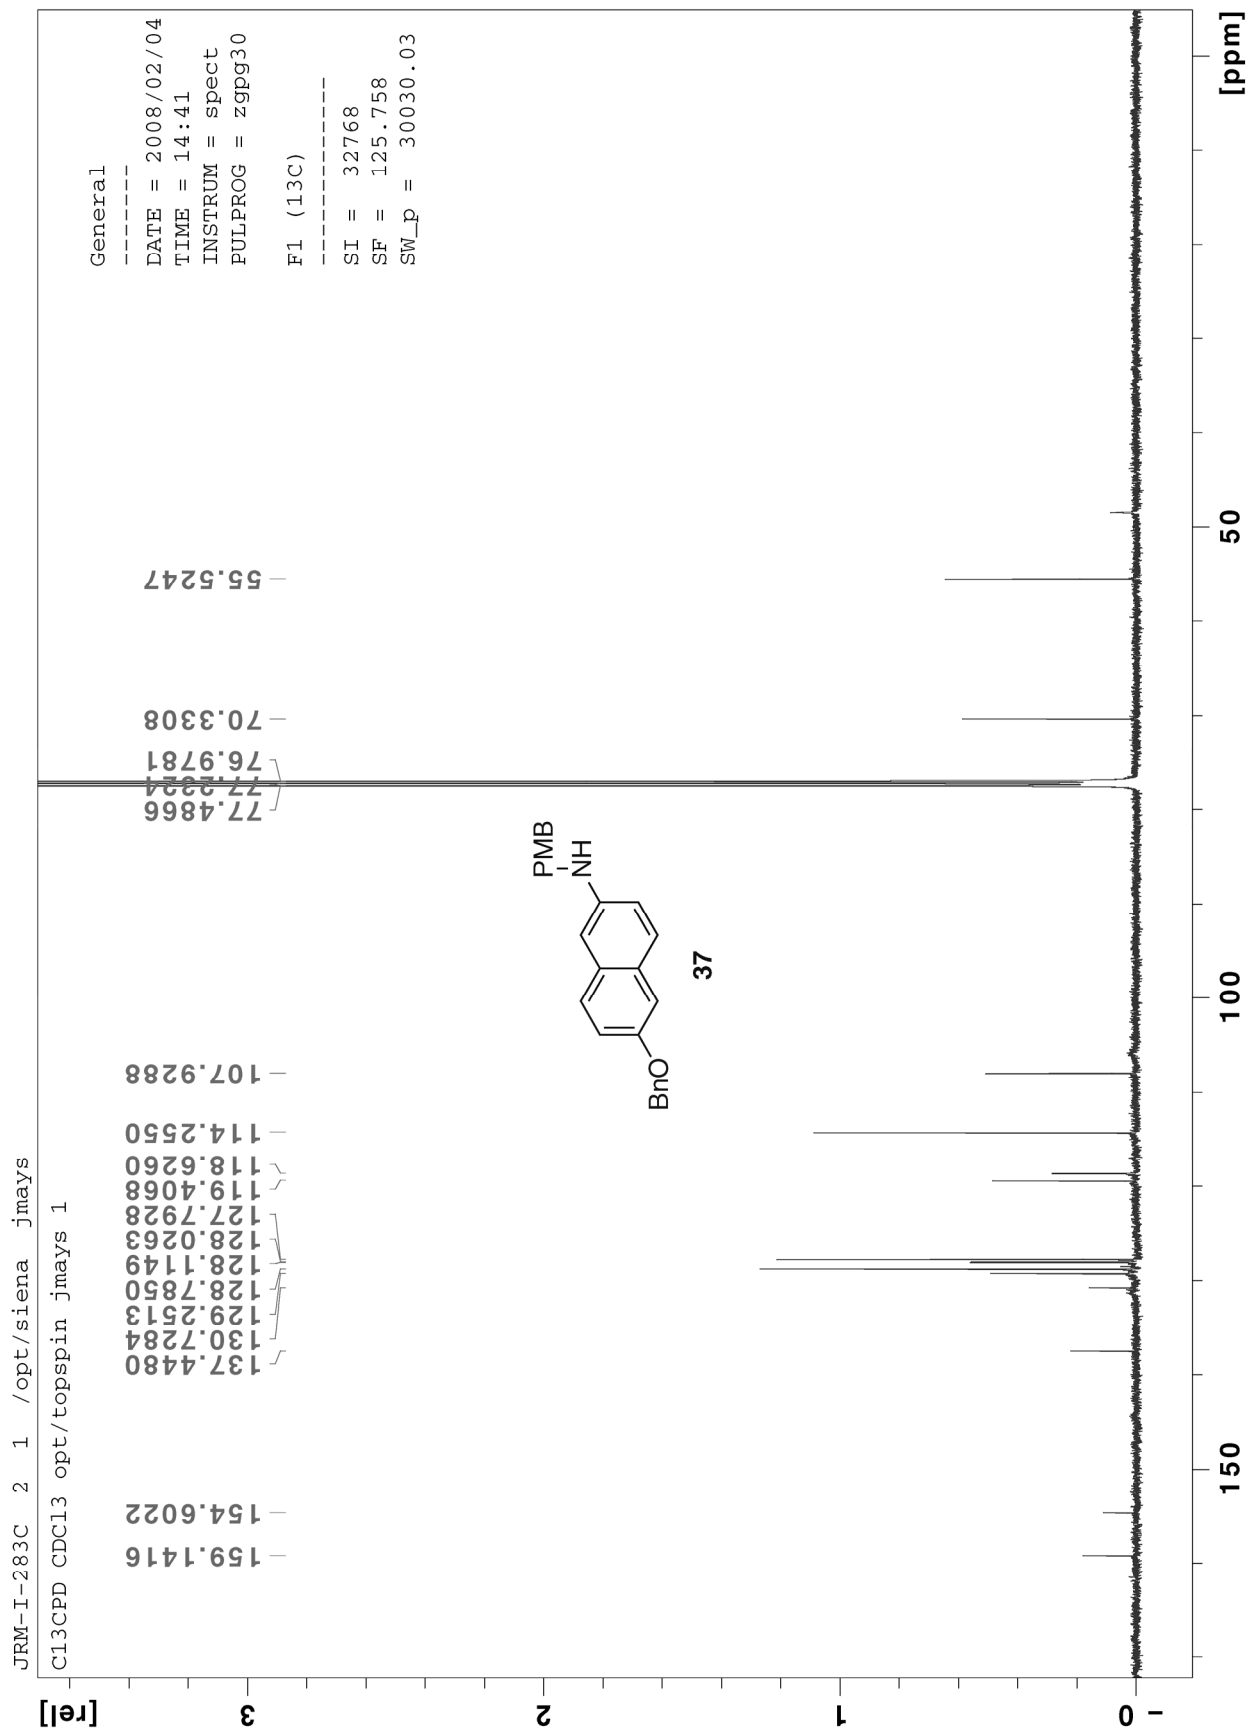

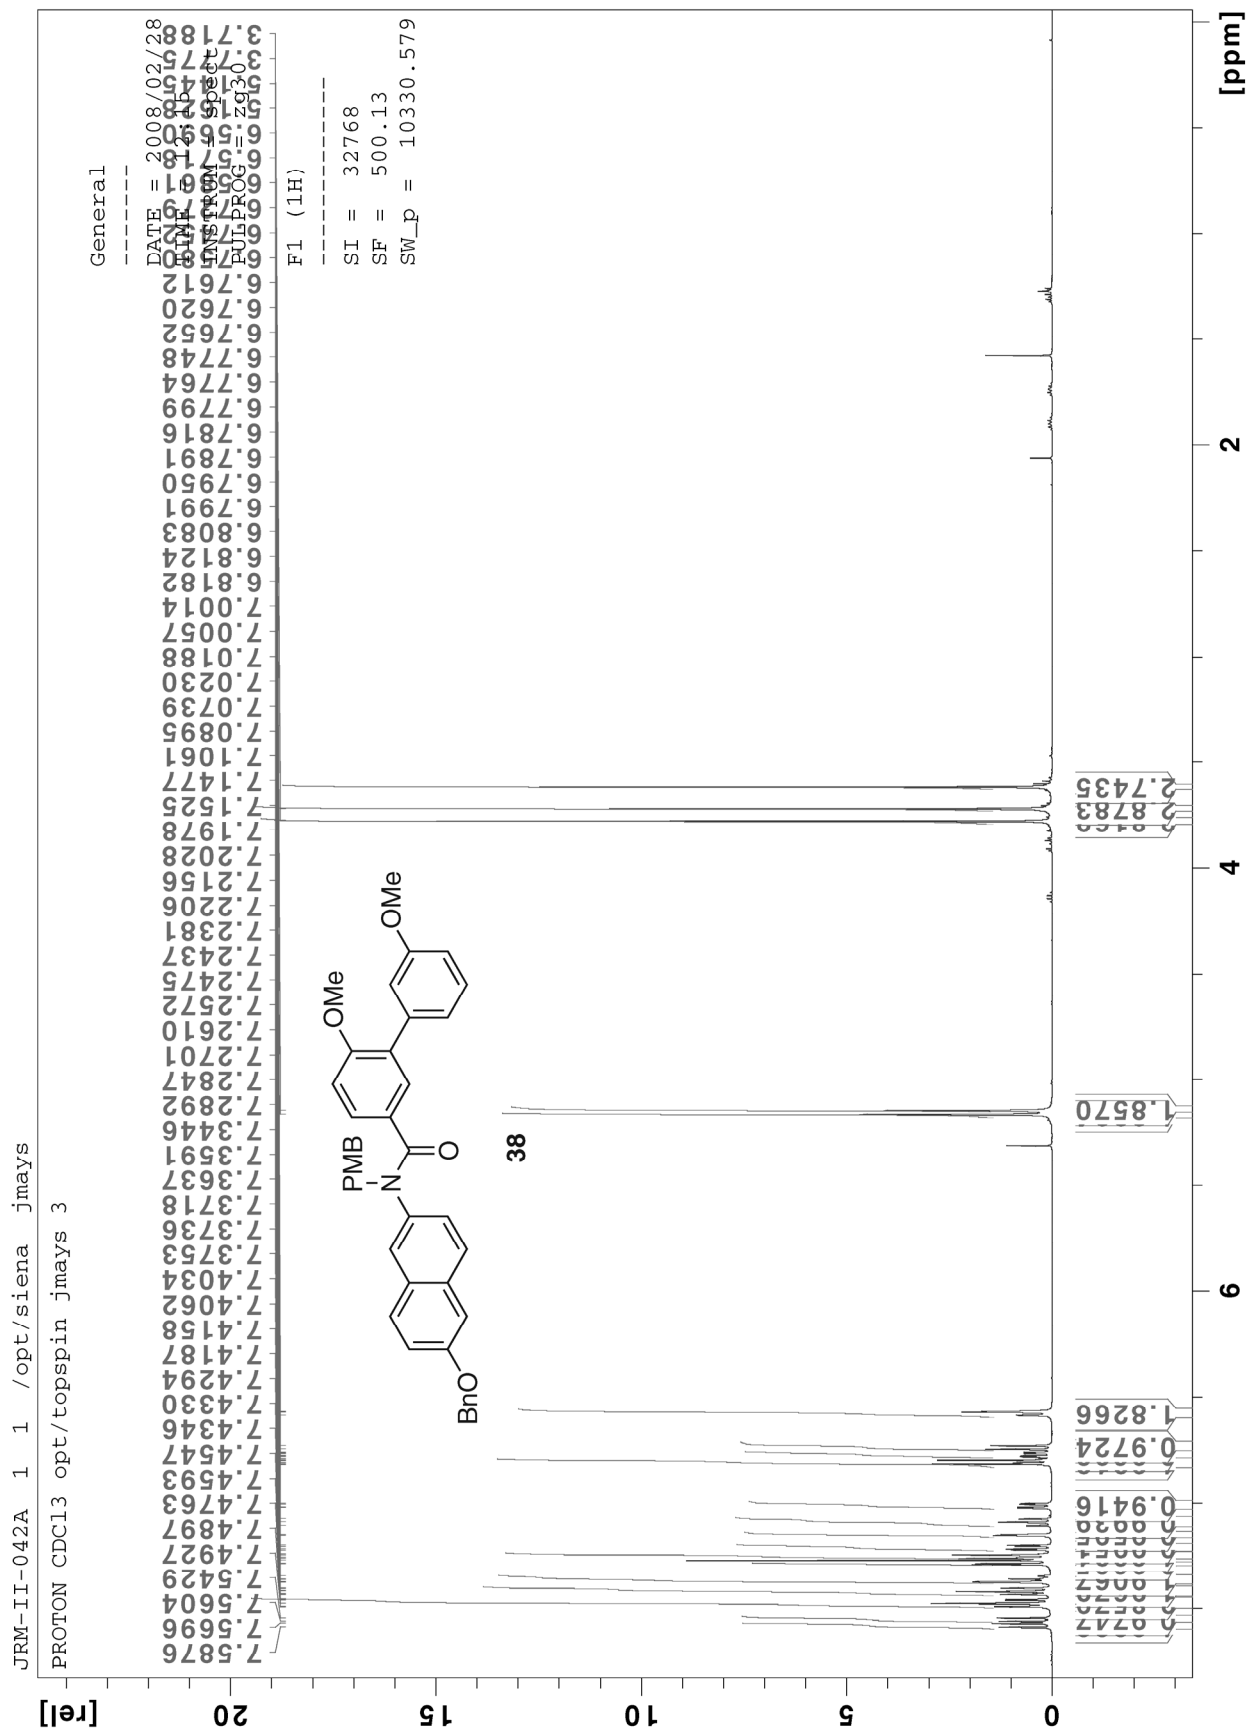



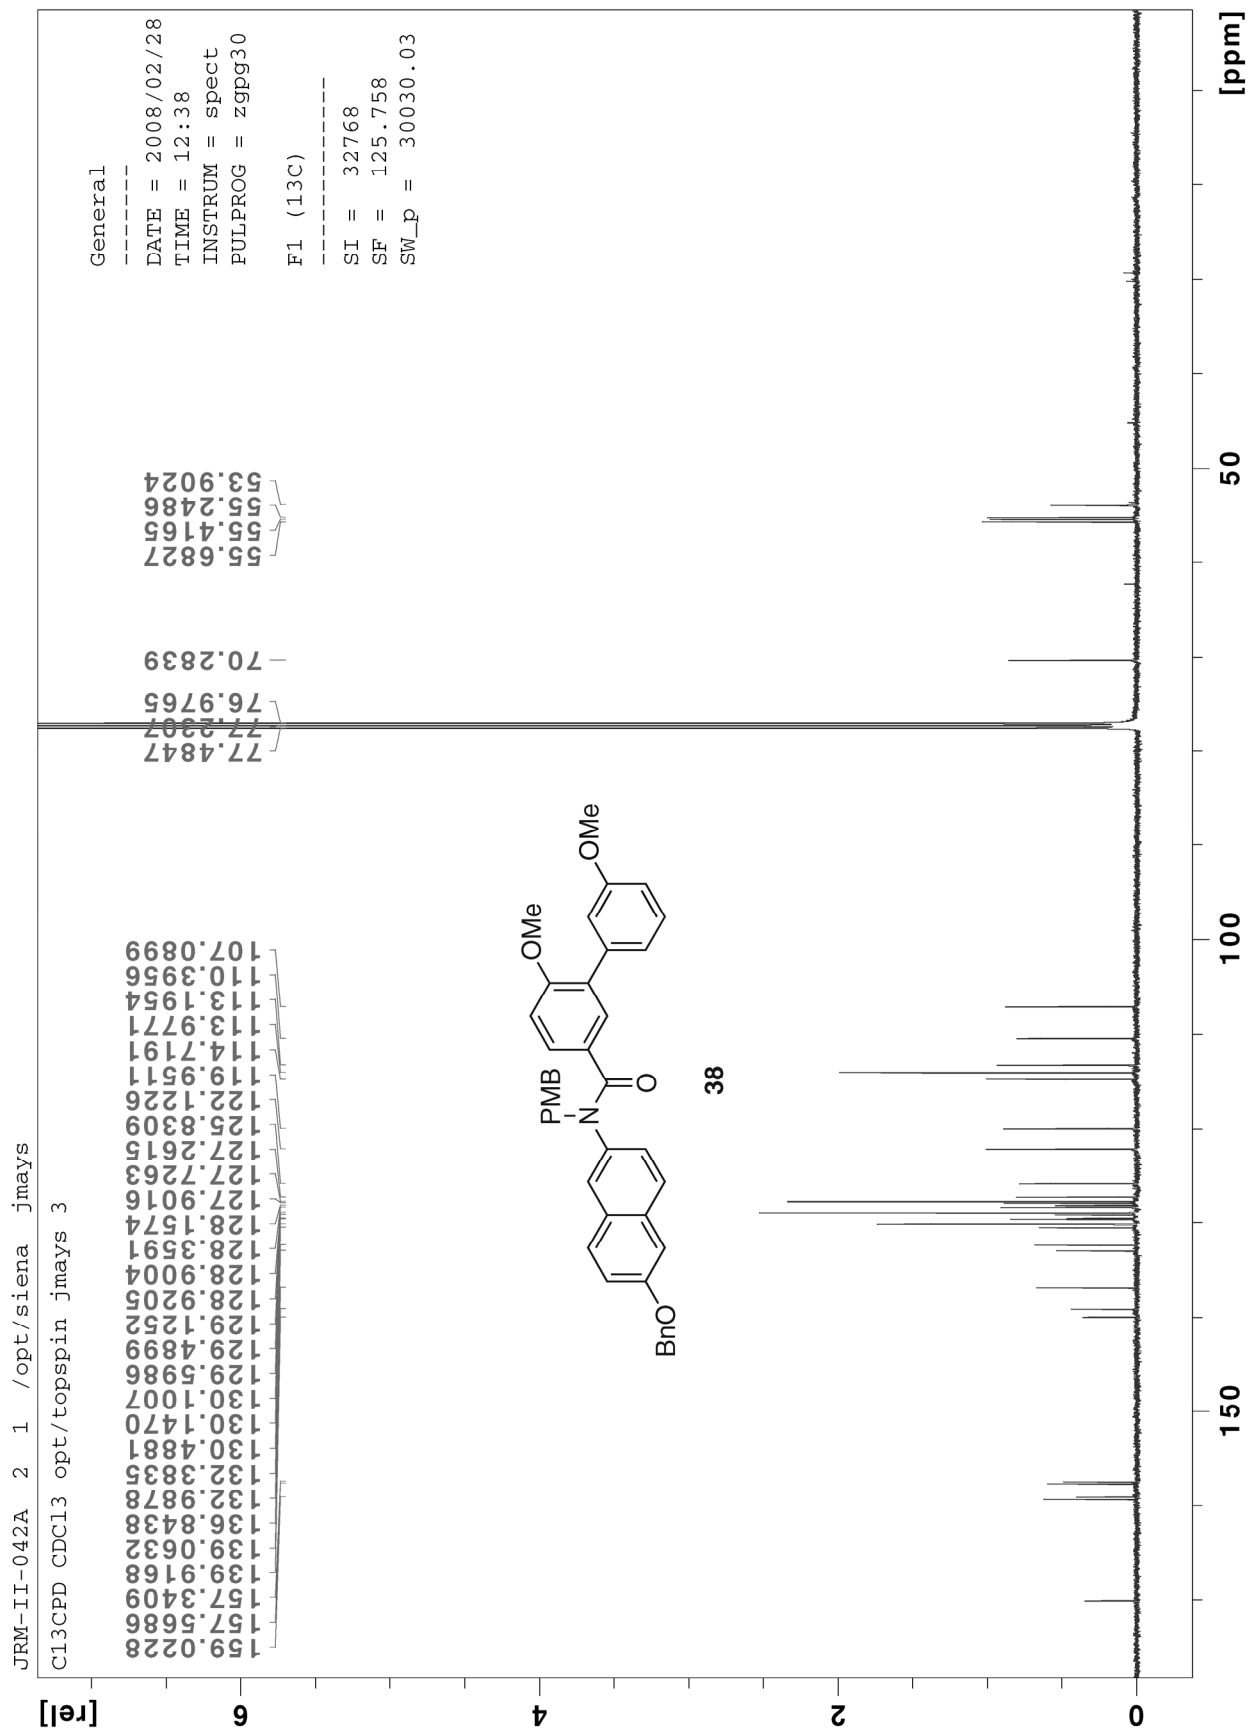

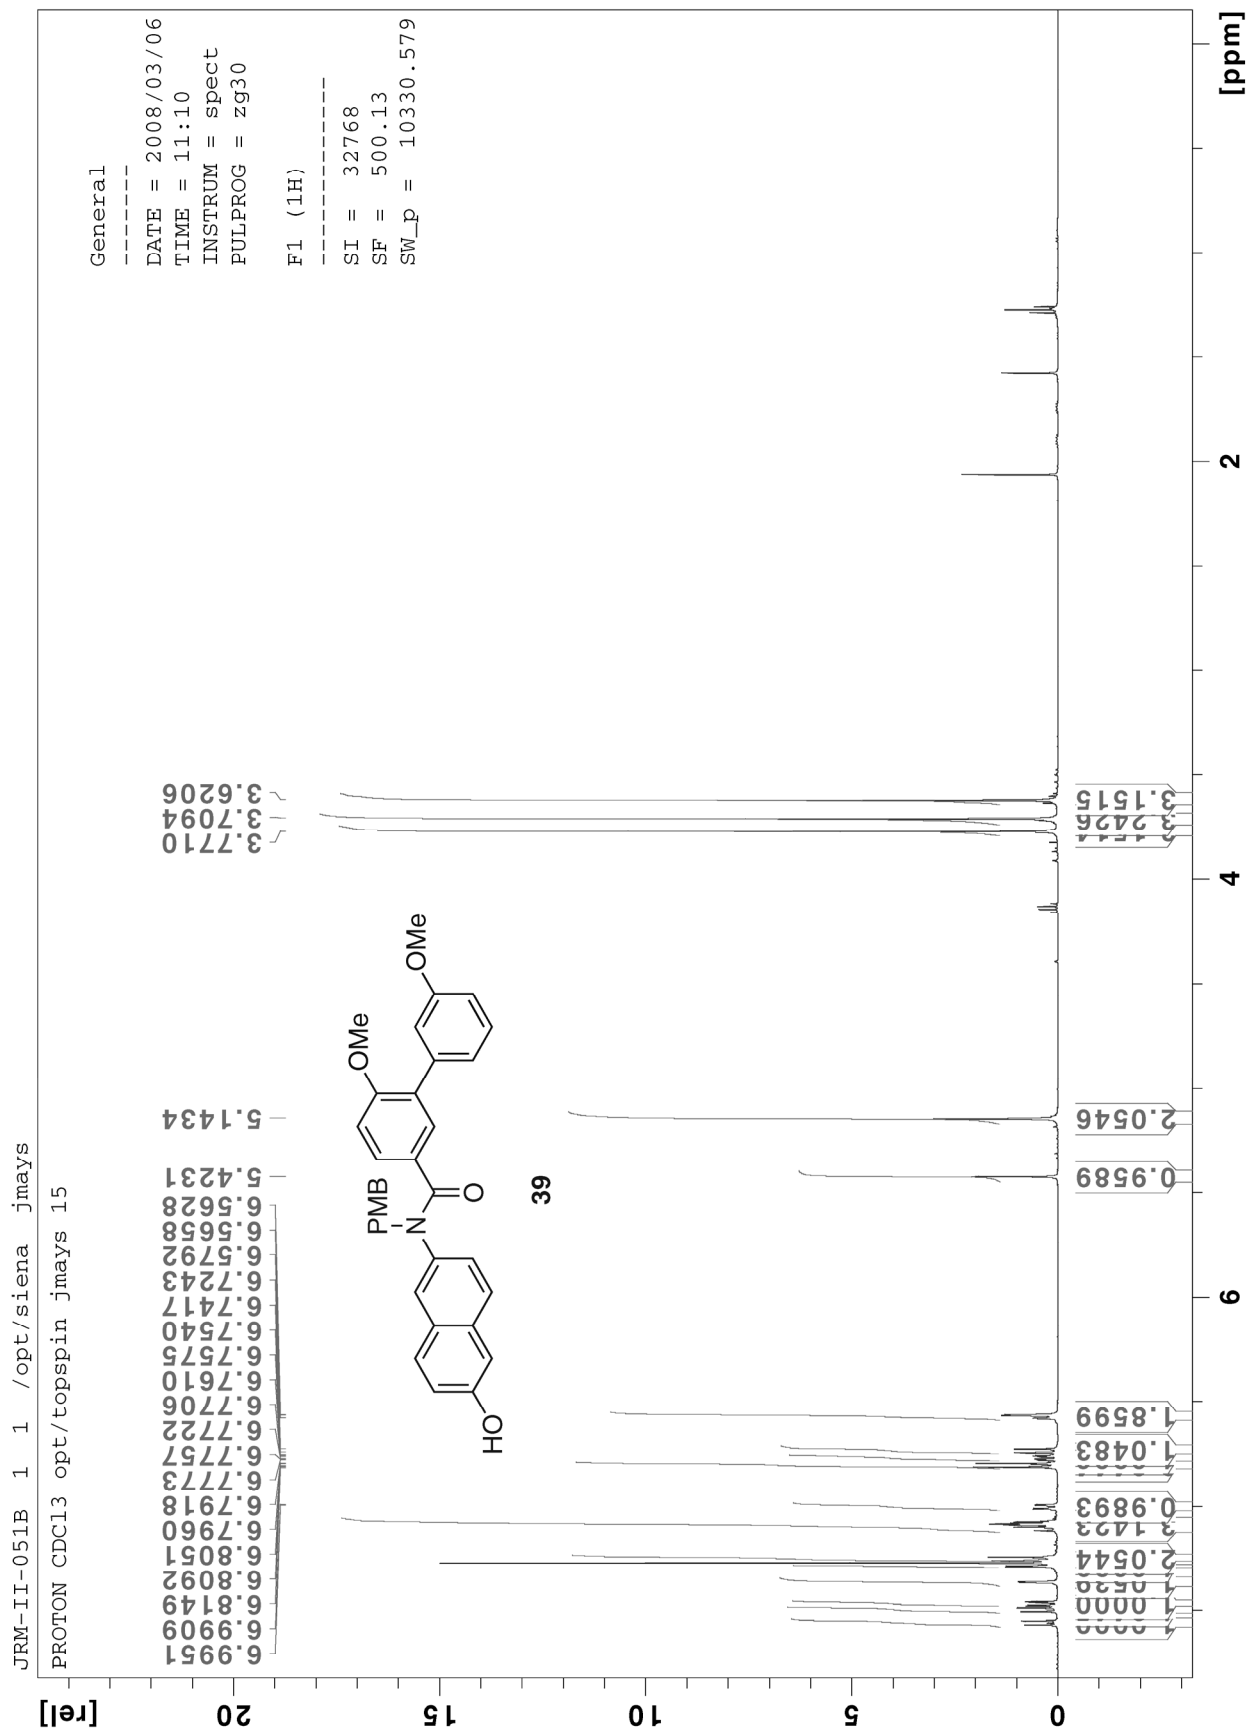

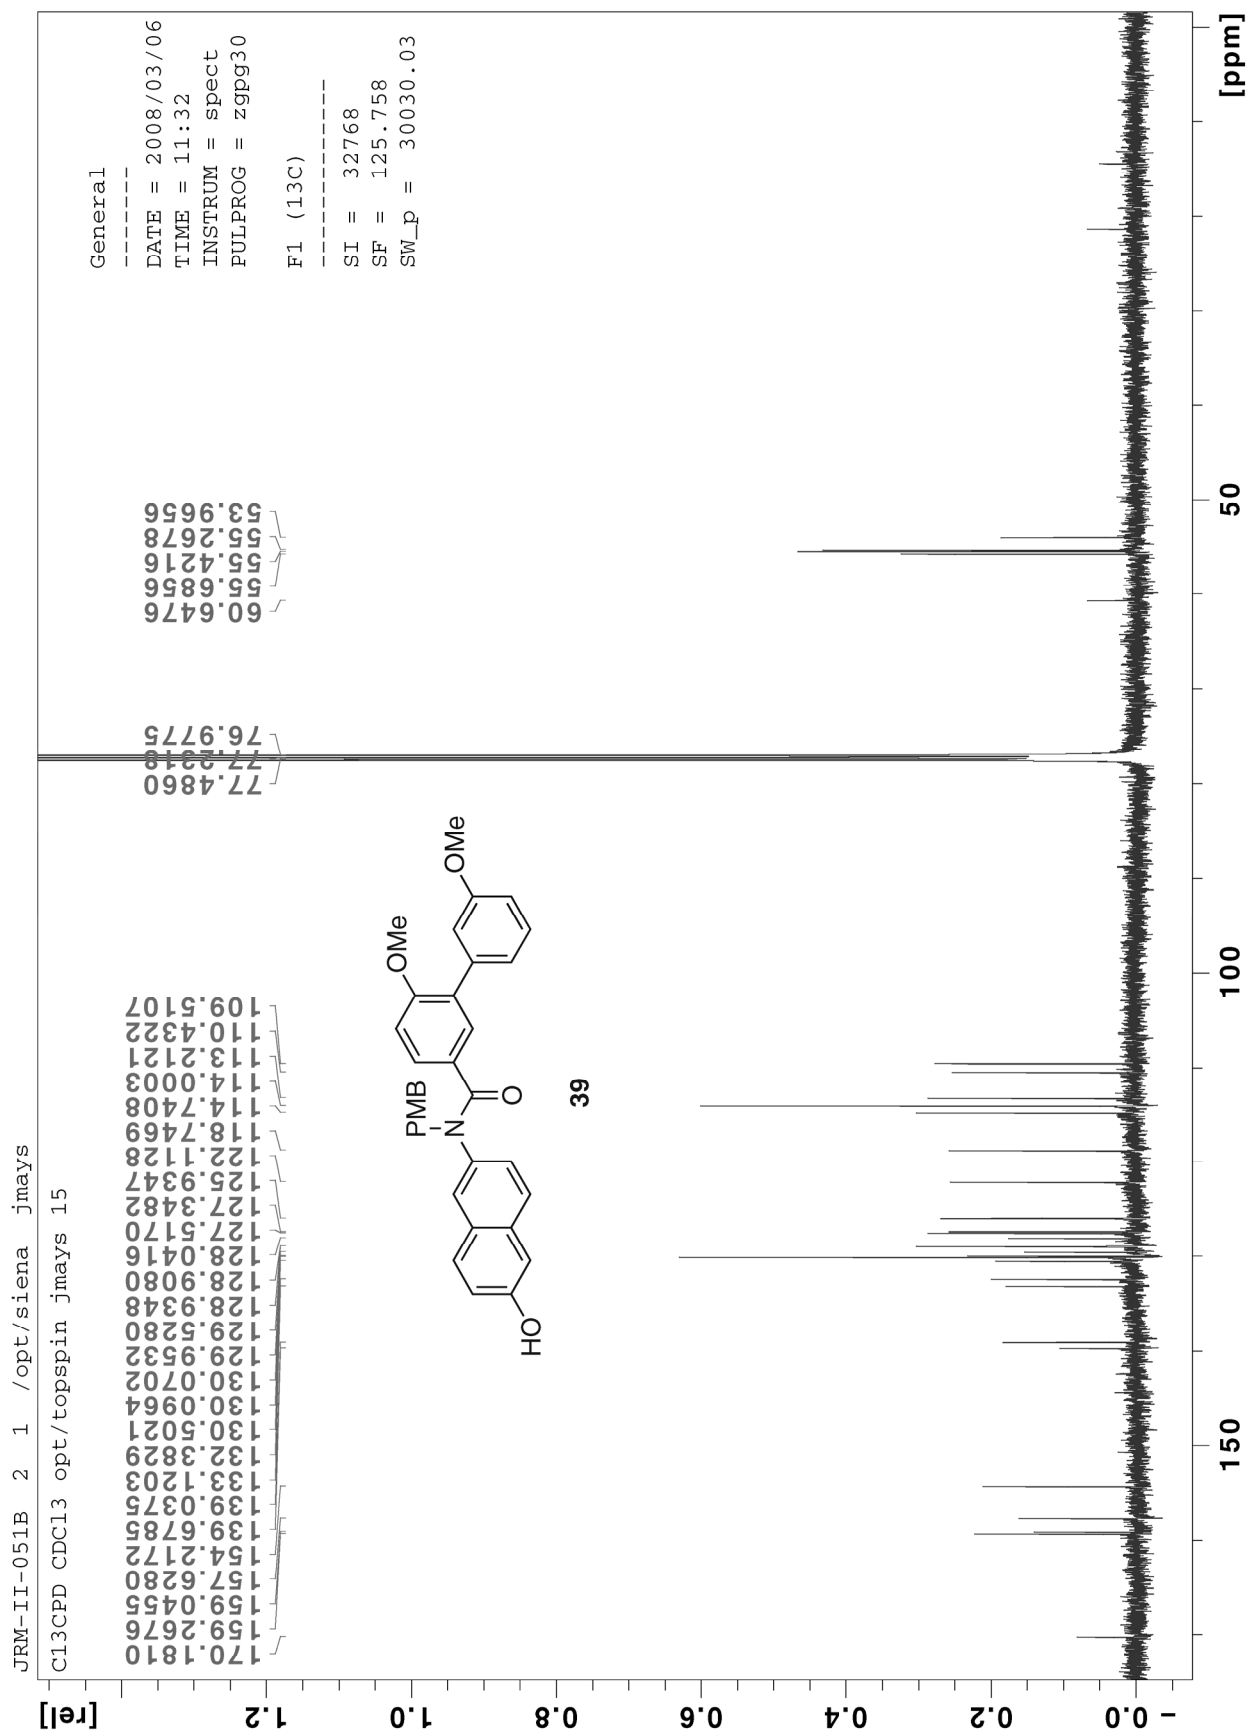

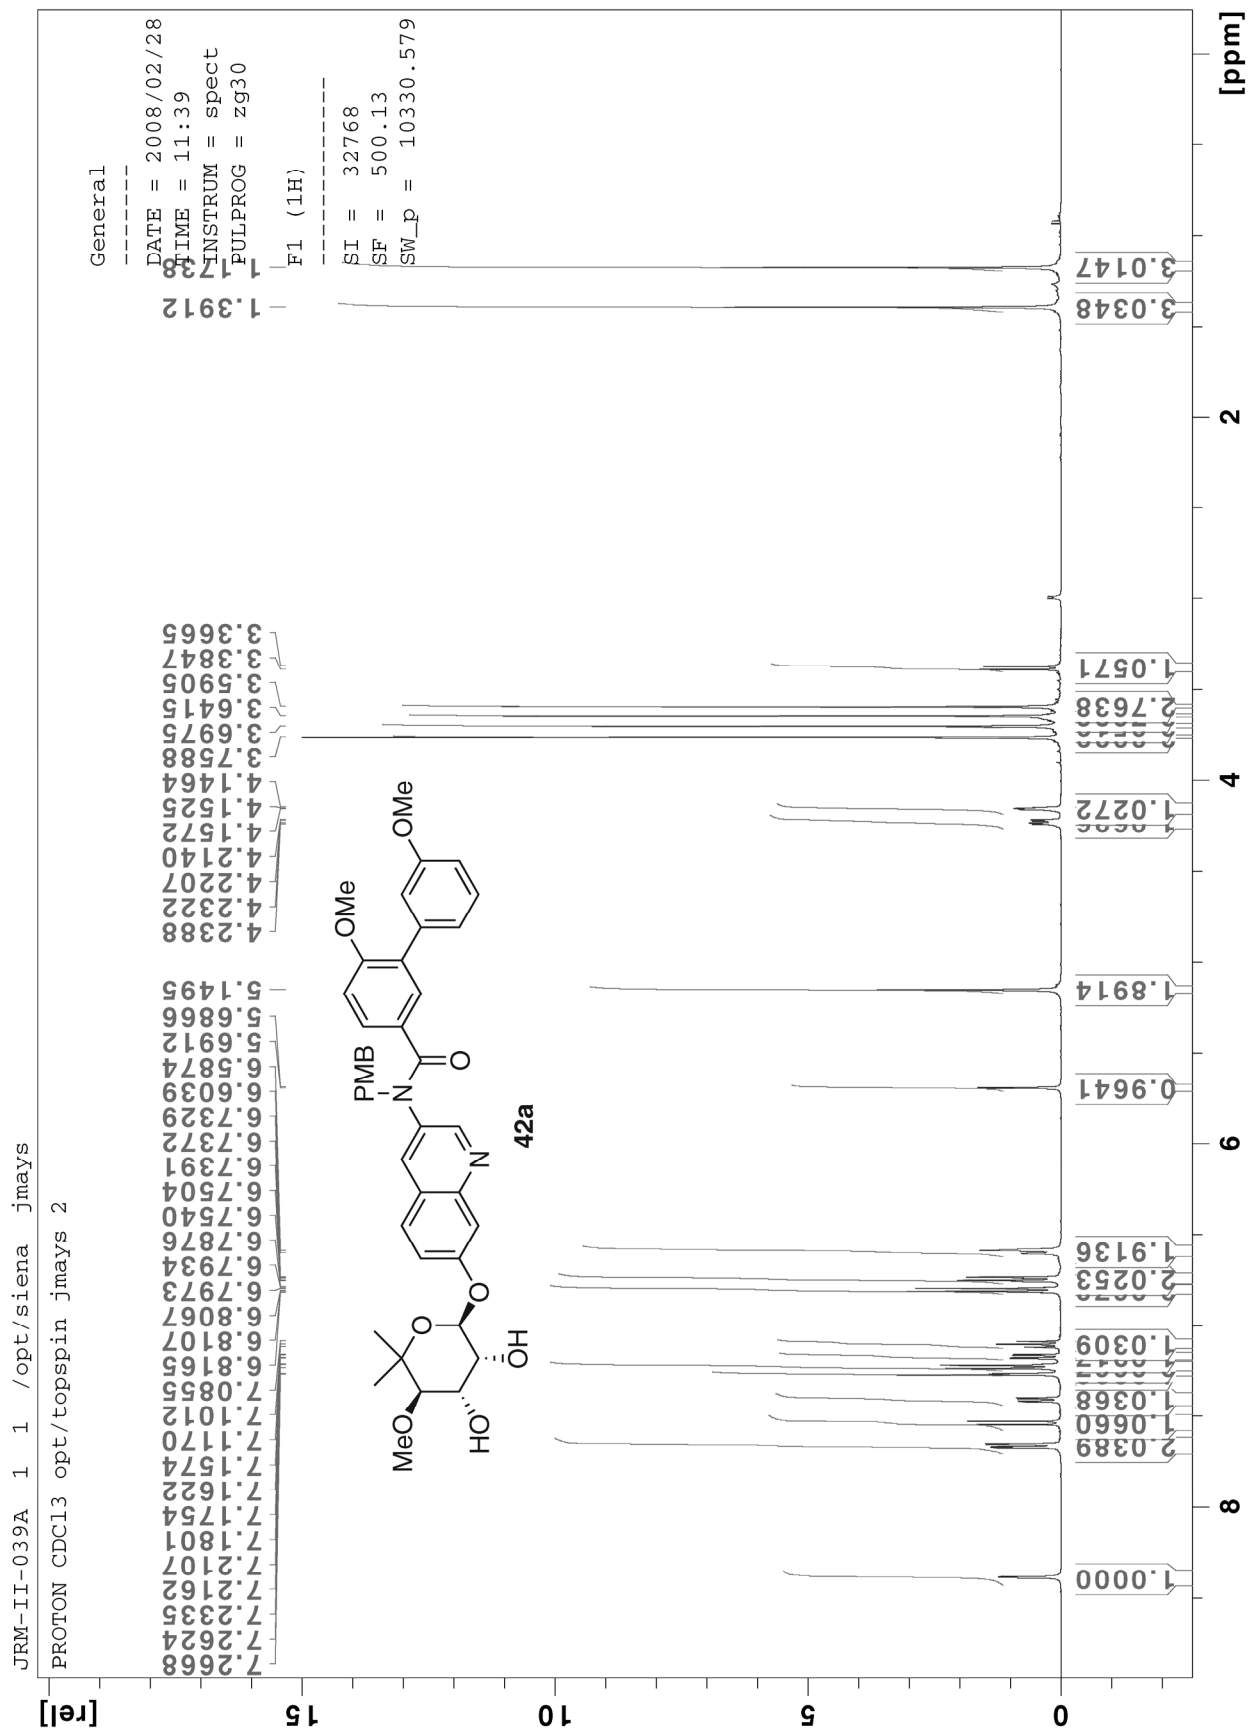

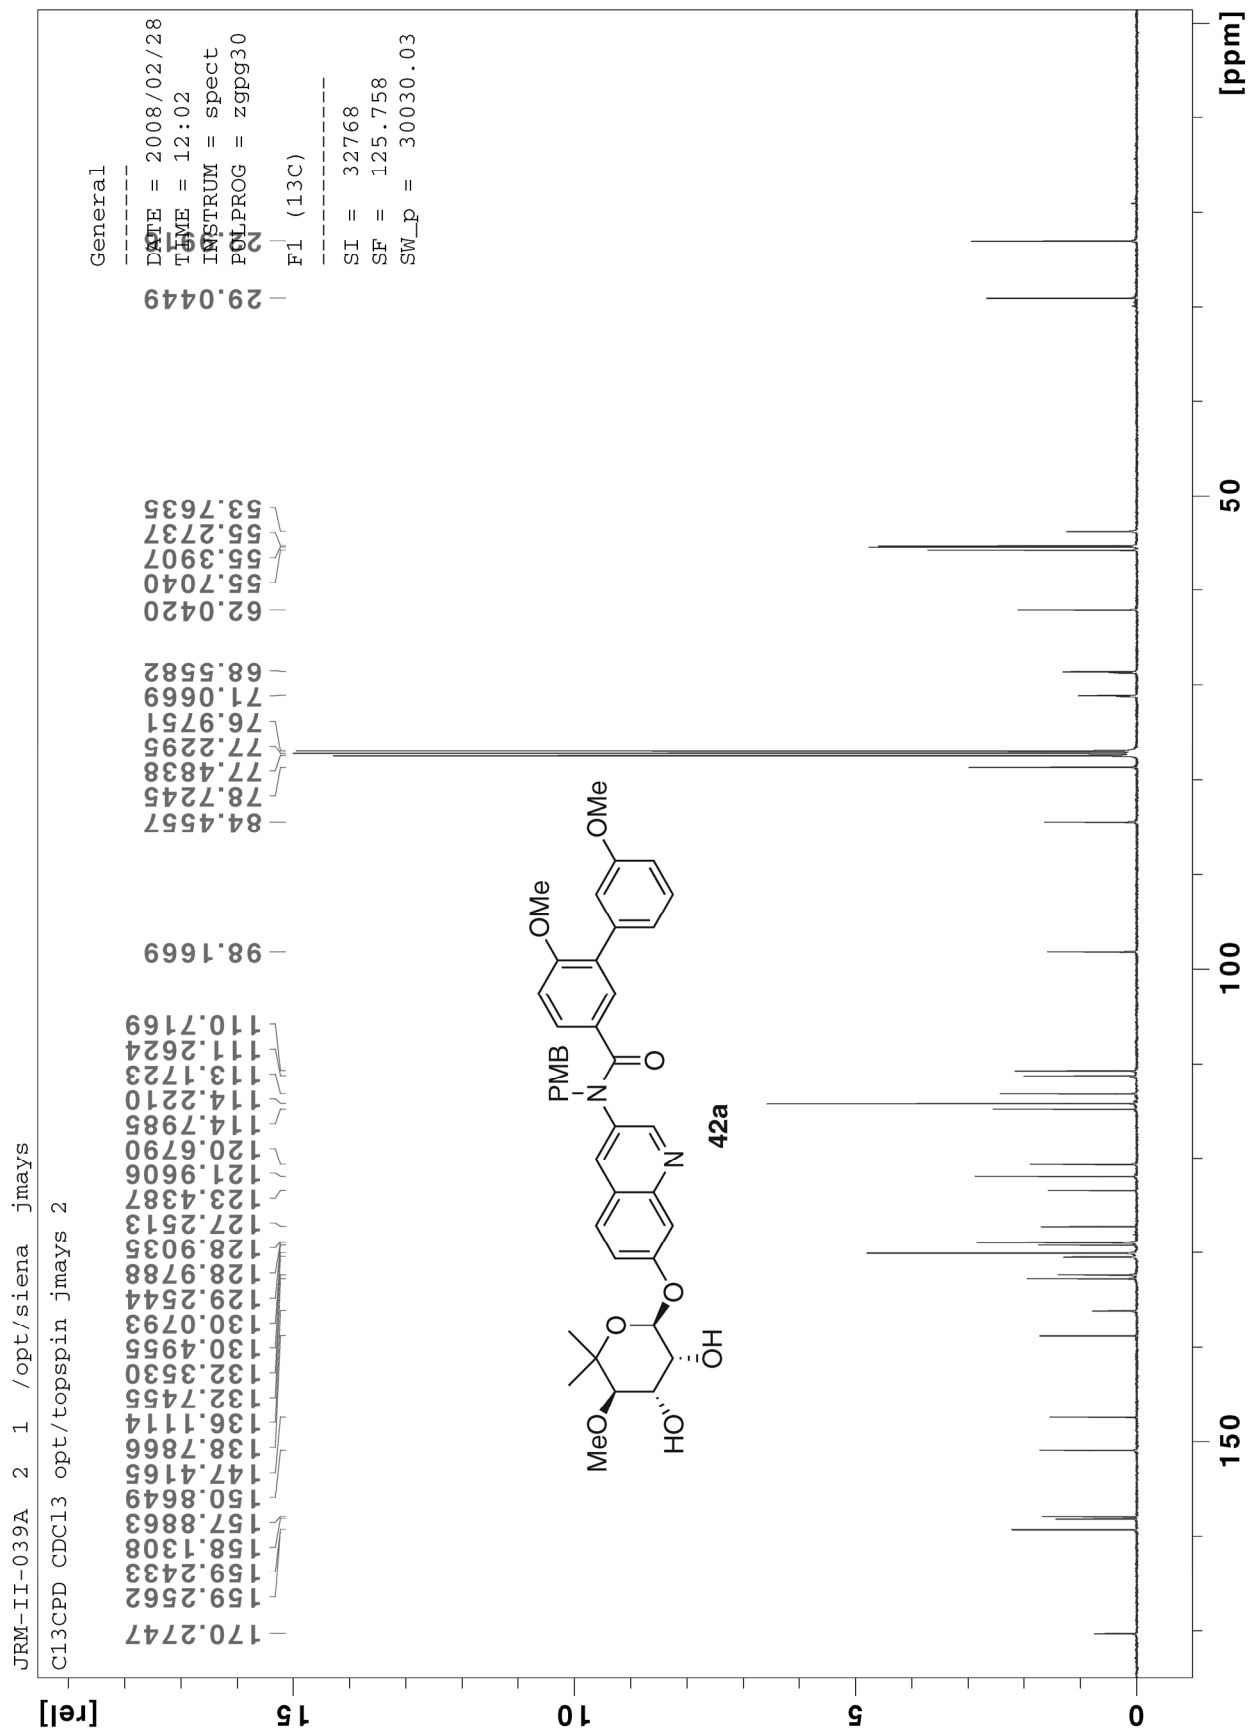

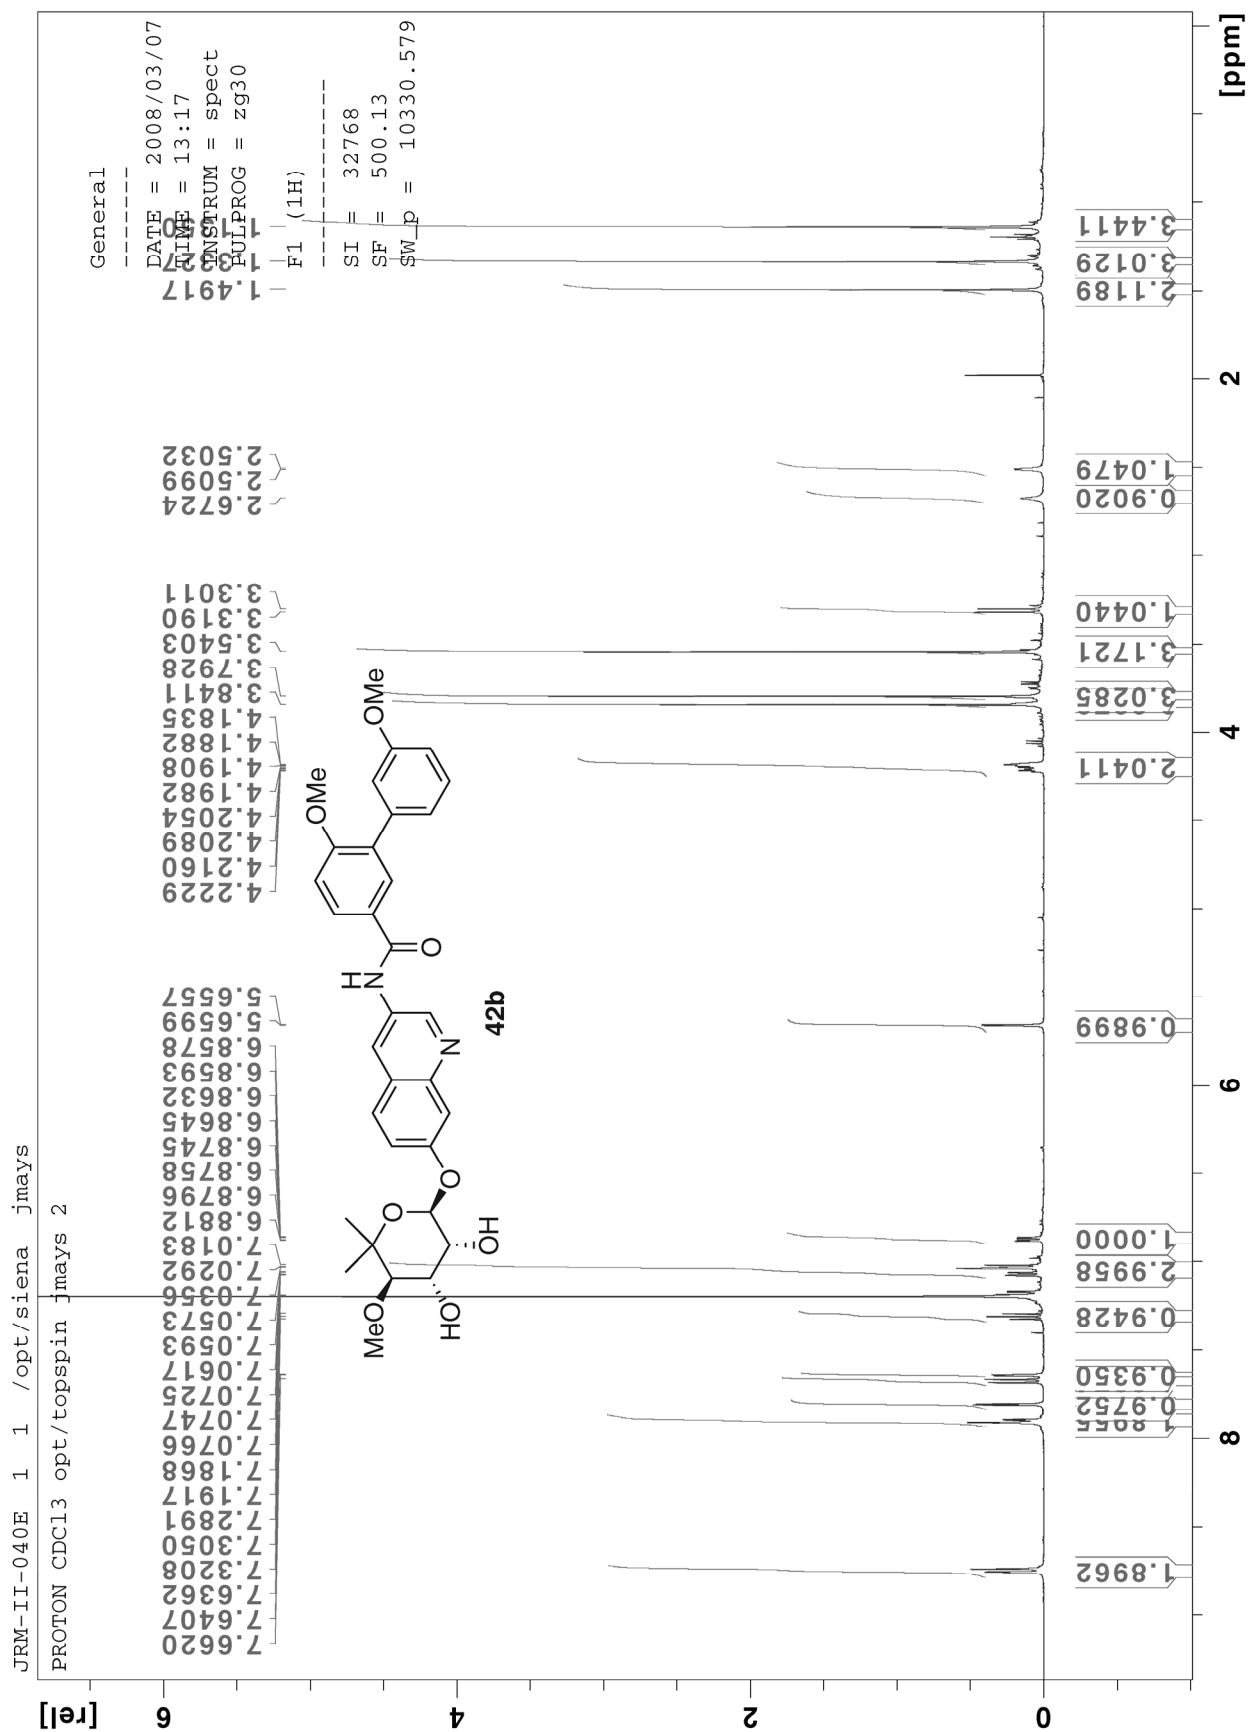

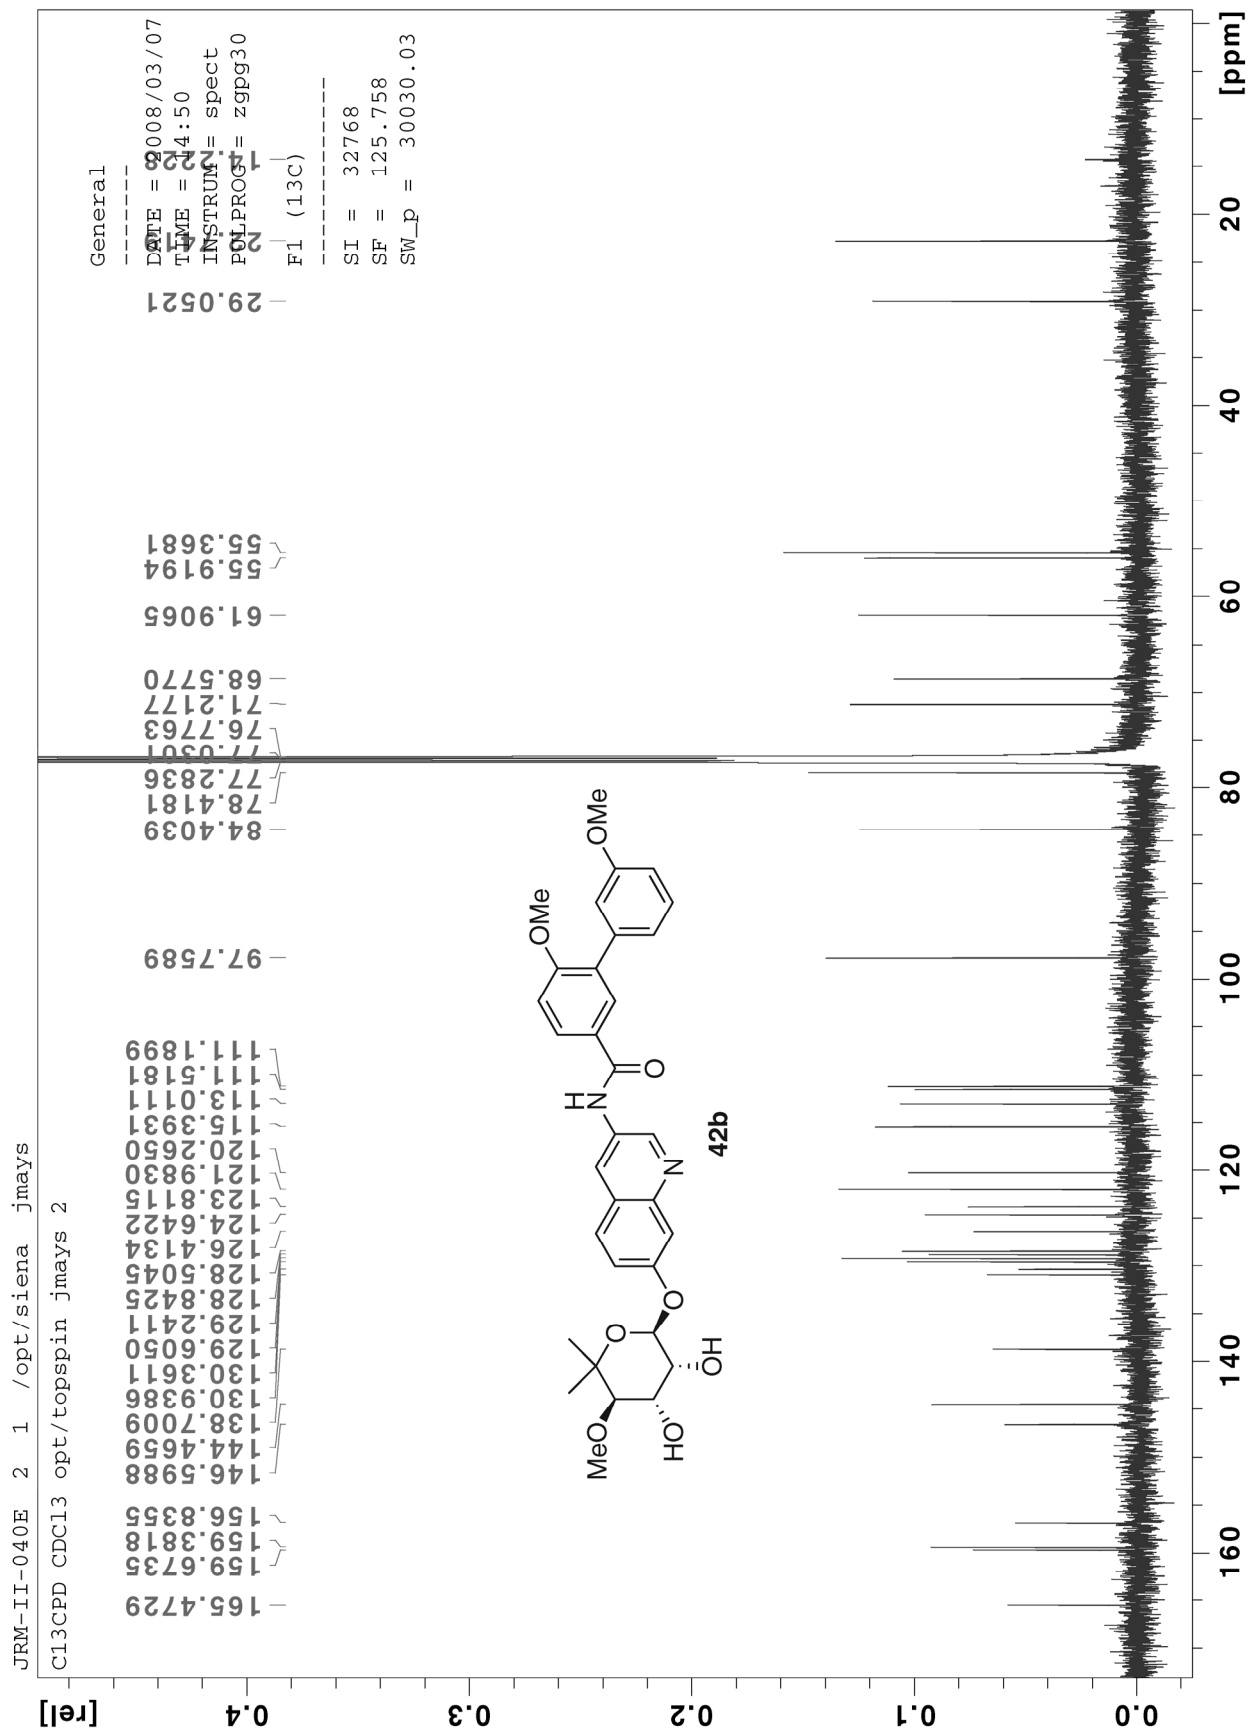

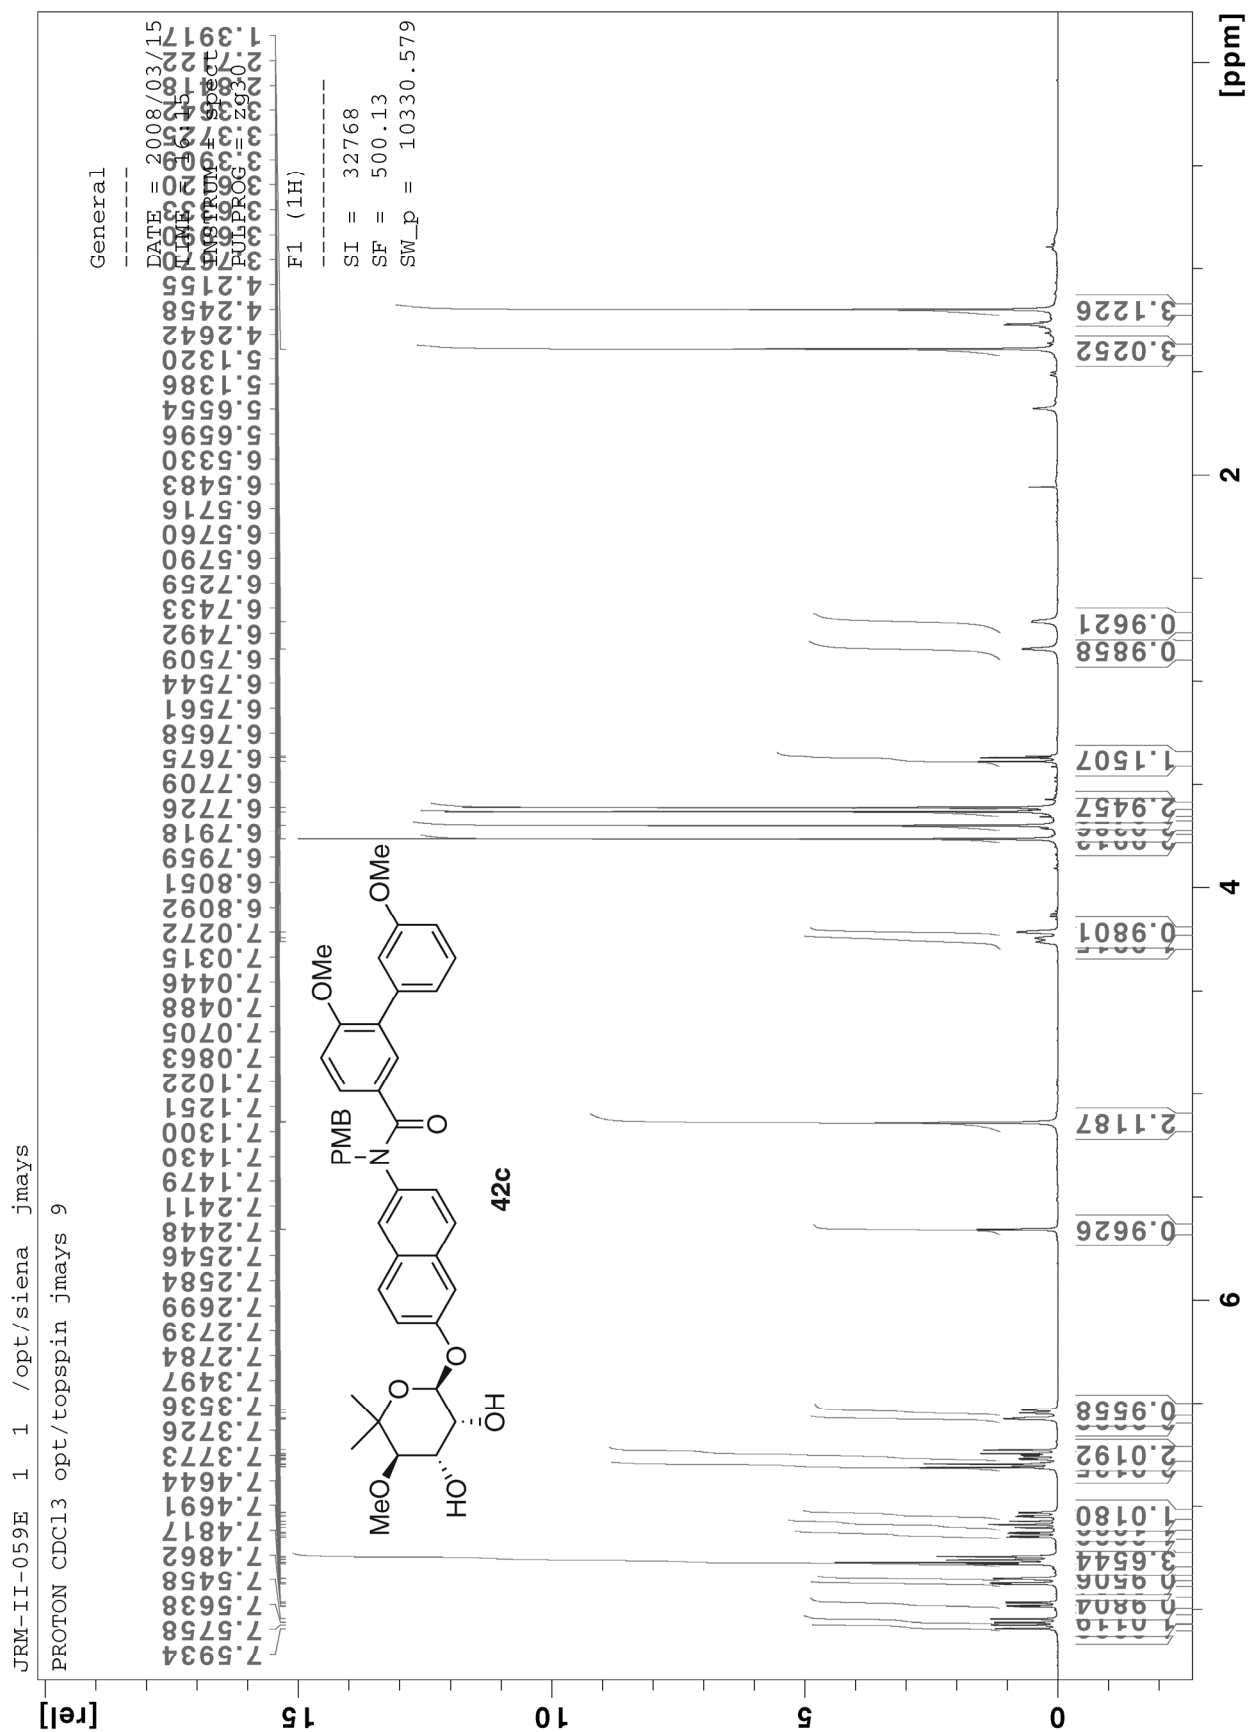



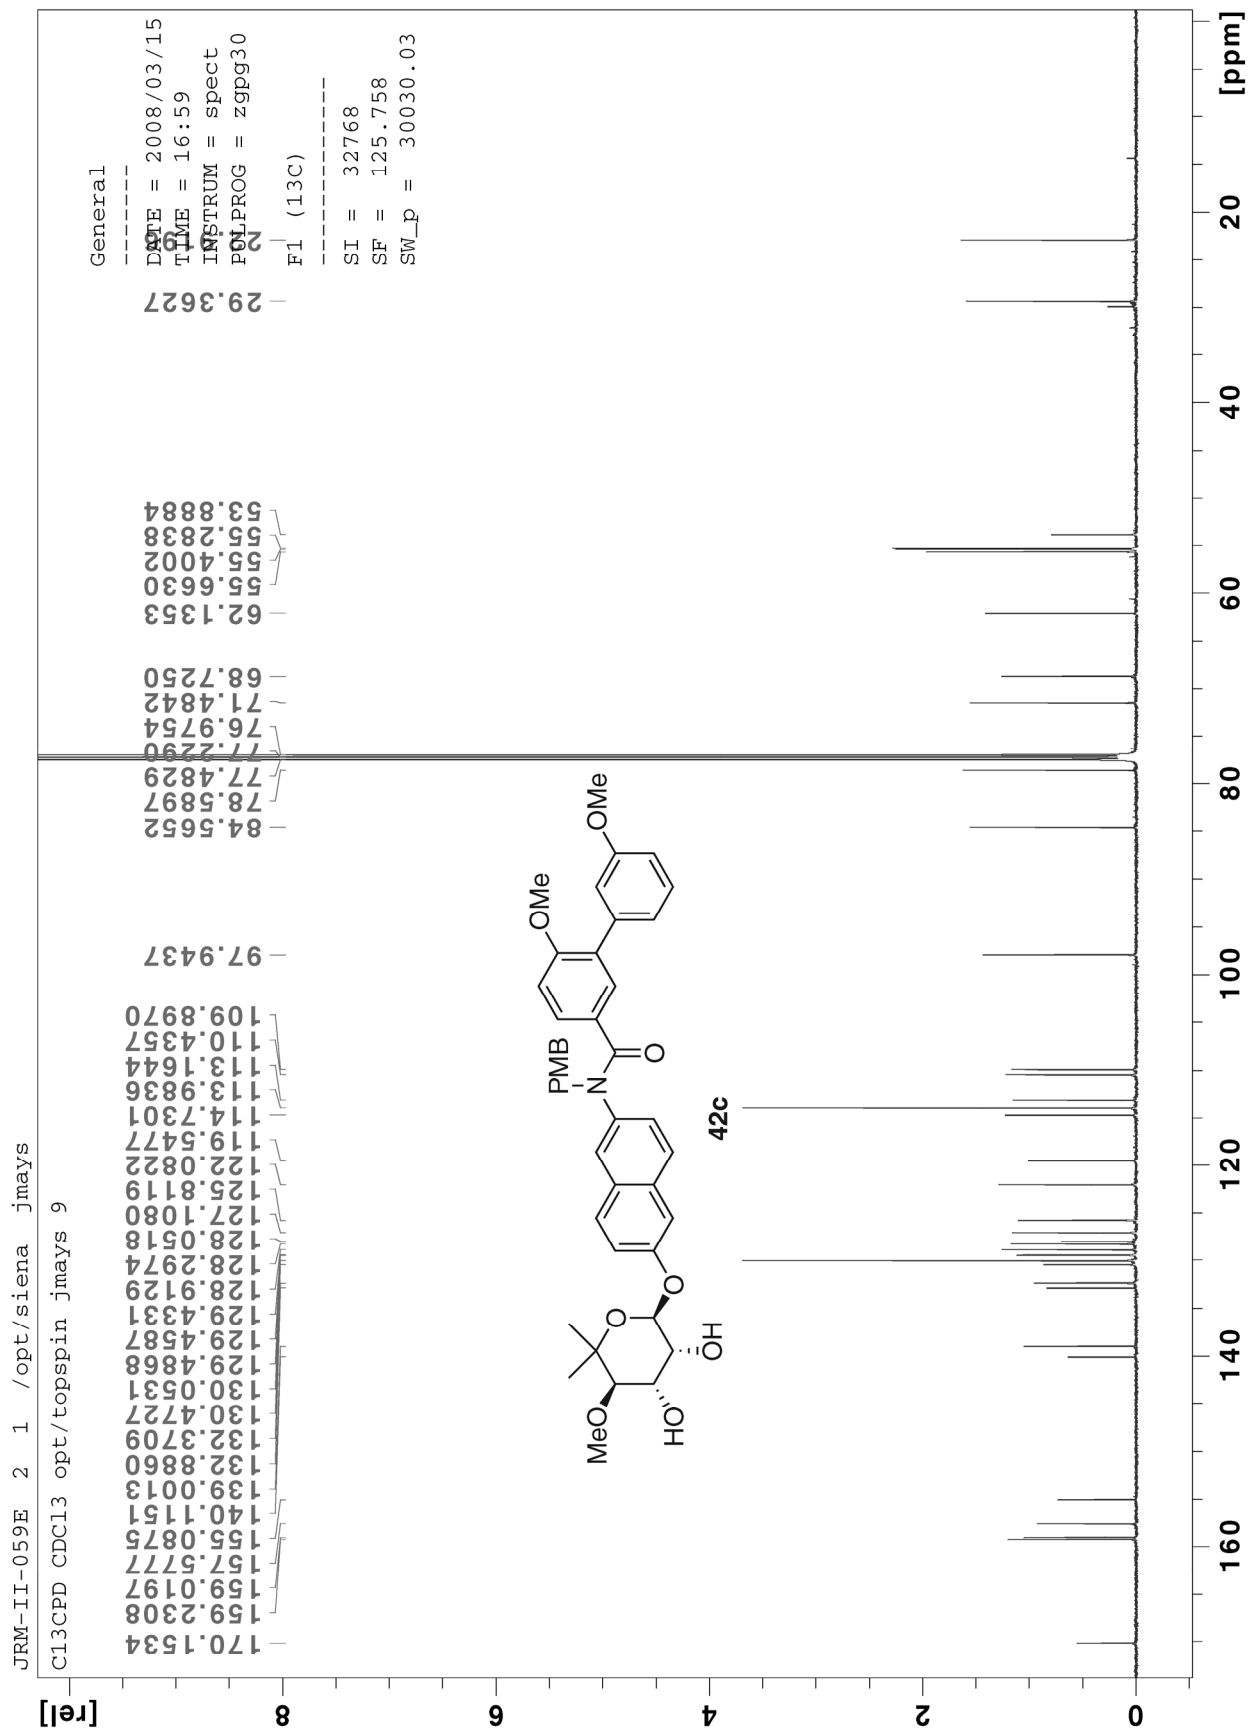



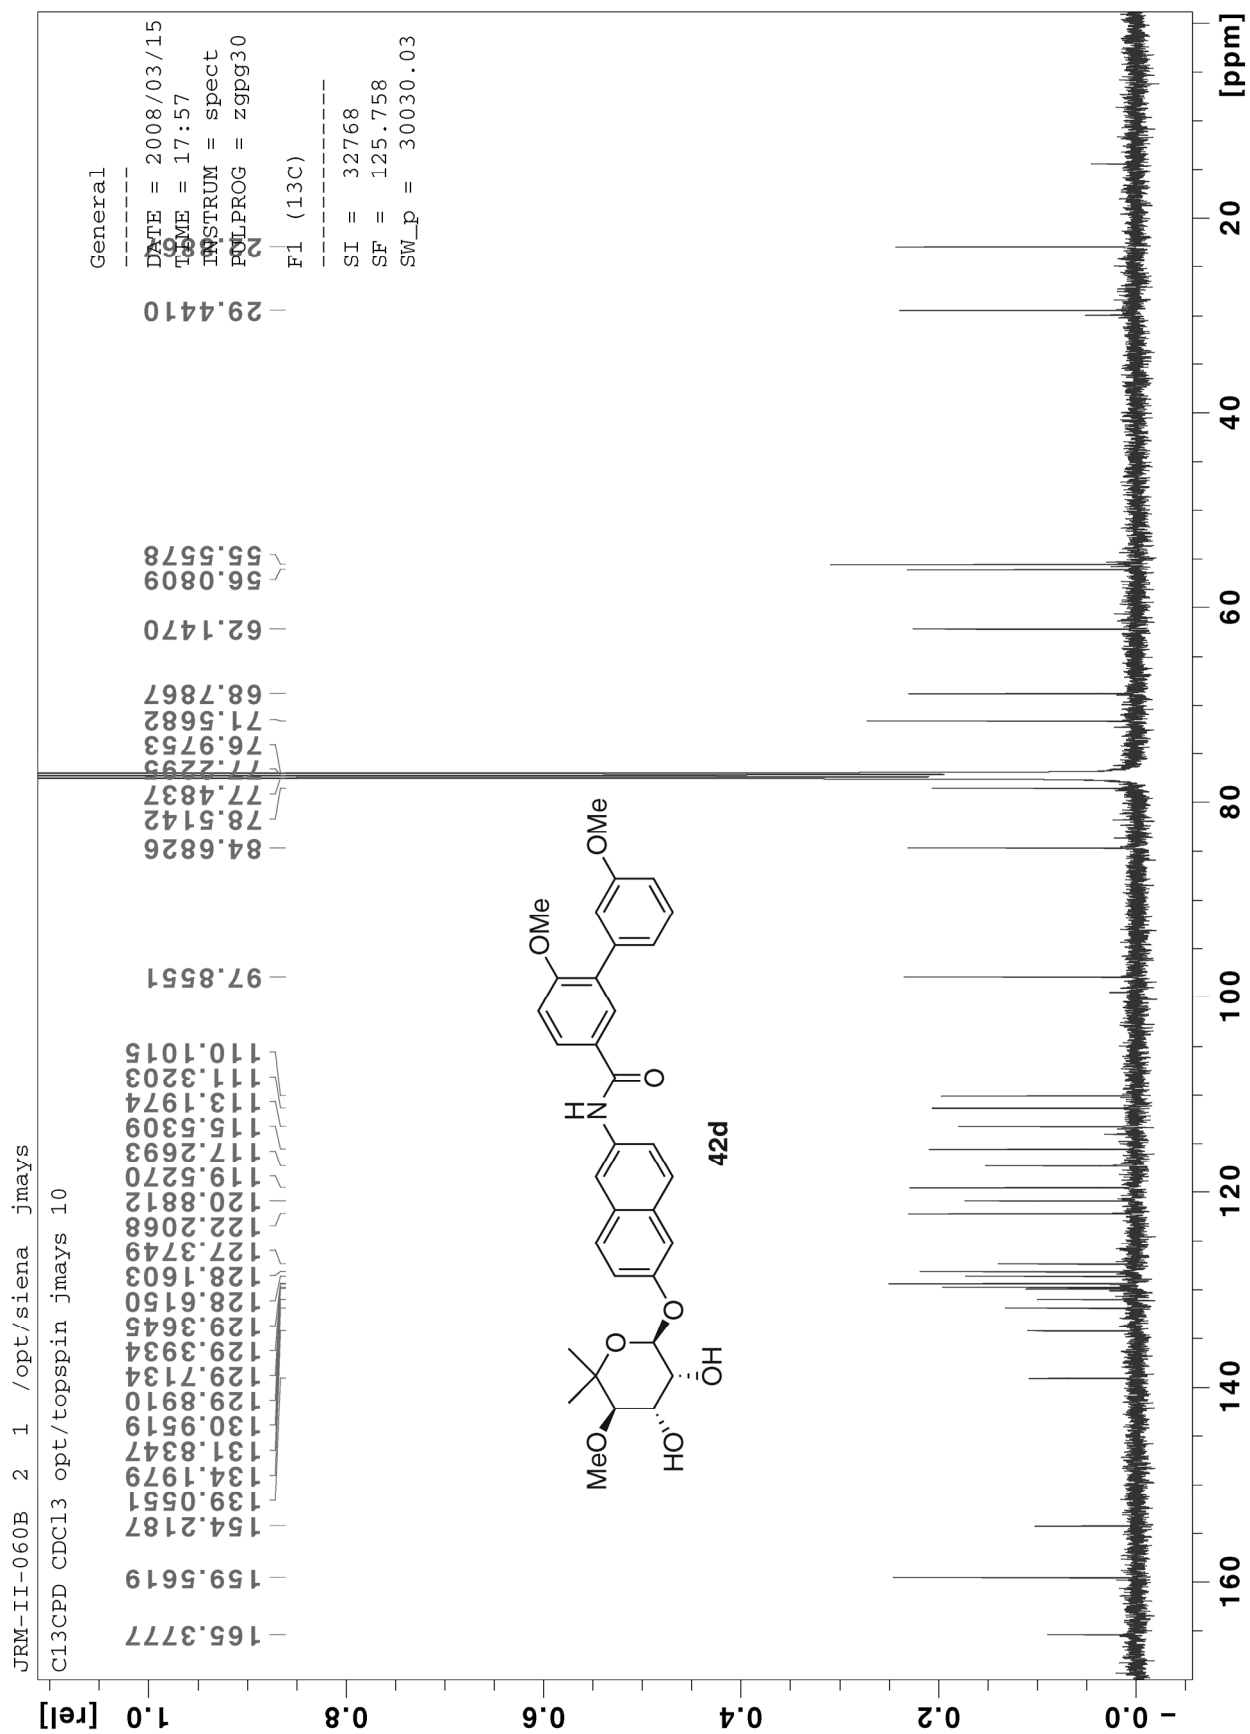

Supplement: NIHMS91111-supplement-1_si_001.pdf [file NIHMS91111-supplement-1_si_001.pdf]
